# Supplementary material
Source: publisher figshare collection journal article supplement (https://gsajournals.figshare.com/articles/dataset/_/6954443)
Supplement: Supplementary file 1 [file 1]

| transcript                | minimum p-value | associated phenotypes (p<2.5E-4)        |
|---------------------------|-----------------|-----------------------------------------|
| <i>CG7420</i>             | 2.03E-05        | female 24hr mortality                   |
| <i>snoRNA:Psi28S-2263</i> | 3.41E-05        | male 3hr knockdown; male 24hr mortality |
| <i>ND-B8</i>              | 5.04E-05        | female 24hr mortality                   |
| <i>CG11099</i>            | 7.41E-05        | male 3hr knockdown                      |
| <i>jb</i>                 | 1.36E-04        | female 24hr mortality                   |
| <i>XLOC_002723</i>        | 1.53E-04        | female 24hr mortality                   |
| <i>XLOC_001737</i>        | 1.89E-04        | female 24hr mortality                   |
| <i>XLOC_004740</i>        | 1.94E-04        | female 24hr mortality                   |
| <i>CG9692</i>             | 2.15E-04        | female 24hr mortality                   |
| <i>smt3</i>               | 2.31E-04        | male 3hr knockdown                      |
| <i>XLOC_003686</i>        | 2.42E-04        | female 24hr mortality                   |
