# Supplementary material
Source: publisher figshare collection journal article supplement (https://gsajournals.figshare.com/articles/dataset/_/6954443)
Supplement: Supplementary file 1 [file 1]

## Sheet: mal.3.pheno
Malathion 3-hour mortality raw phenotypes
DGRP line	male	female
21	0	0.0555556
26	0	0
28	0.481481	0.84127
31	0.34	0.0472222
32	0.388889	0.4
38	0.666667	0.25
40	0	0.0357143
41	0	0
42	0	0
45	0.646667	0.616667
48	0.15625	0
57	0.883333	0.422222
59	0	0.0625
73	0	0
75	0.047619	0
91	1	1
93	0.283333	0.15873
100	0.408333	0.125
101	0	0.281481
109	0	0
129	0	0
136	0.478571	0.275
138	0.174603	0.222222
142	0	0
153	0	0
181	0.15	0
189	0	0.0625
195	0.025	0
208	0.766667	0.205952
217	0	0
227	0	0
228	0	0.0952381
229	0.166667	0.435
235	0.481481	0.333333
237	0	0
239	0.636752	0.166667
280	0	0
287	0.232143	0.404762
301	0	0
303	0.119048	0
304	0	0
306	0	0
307	0	0
309	0	0
313	0	0
315	0	0
317	0	0
318	0.2	0.0844444
319	0	0.037037
320	0	0
321	0	0
324	0.0833333	0.305556
332	0.166667	0.595238
335	0	0
336	0.72381	0.683838
338	0	0
340	0	0.0333333
350	0	0
352	0	0
356	0.666667	0.677249
357	0.75	0
358	0	0
359	0.137037	0.0703704
360	0	0
361	0	0
362	0.0416667	0
365	0	0
367	0.166667	0.544643
370	0.3	0.272727
371	0.448139	0.256667
373	0.047619	0.047619
375	0	0
377	0	0.037037
379	0	0
380	0.477778	0.222222
381	0.666667	0.452381
382	0	0
383	0	0
385	0	0
386	0.075	0.0740741
391	0.357143	0.161111
392	0	0
395	0	0
397	0	0
399	0	0
405	0.48	0.2
406	0.0555556	0.0833333
409	0	0
426	0	0
427	0	0
437	1	0.7
439	0	0
440	0	0
441	0.277778	0.111111
443	0.385714	0.594709
486	1	1
491	0	0.037037
502	0.777778	0.375
509	0	0
517	0.0422222	0.075
528	0	0
530	0.125	0.166667
531	0	0.0666667
535	0.113636	0.12
551	0.336508	0.05
555	0.634921	0.383333
559	0	0
563	0.047619	0.037037
566	0.290794	0.628571
584	0	0
589	0	0
595	0	0
596	0.171429	0.0333333
627	0	0
639	0	0
642	1	1
646	0.0625	0
703	0	0
705	0	0
707	0	0
712	0	0
714	0	0
716	0.333333	0.316667
721	0	0
730	0	0
732	0.0416667	0.12
737	0	0
738	0	0
748	0	0
757	0	0
761	0.111111	0.0952381
765	0	0
774	0.125	0.0333333
776	1	1
783	0	0
786	0.560847	0.52381
787	0.138889	0.0333333
790	0	0
796	0	0
799	0	0
801	0	0
802	0	0.0555556
804	0	0.21875
805	0.05	0
808	0	0
810	0.166667	0.66
812	0	0
818	0	0
819	0.470238	0.825794
820	0	0
821	0.656746	0.916667
832	0.0555556	0
837	0	0
843	0	0
849	0	0
850	0	0
852	0.625	0.570794
853	0.133333	0.0277778
855	0	0
859	0.233333	0.0666667
861	0	0
879	0	0
884	0.0666667	0
892	0.374107	0.142857
894	0.037037	0
897	0.037037	0.0333333
900	0.115	0.15873
907	0	0
908	0	0
913	0	0

## Sheet: mal.3.GWAS
Malathion 3-hour mortality DGRP pipeline output
ID	MinorAllele	MajorAllele	RefAllele	MAF	MinorAlleleCount	MajorAlleleCount	FemaleEff	FemalePval	FemaleMixedPval	MaleEff	MalePval	MaleMixedPval	AvgEff	AvgPval	AvgMixedPval	DiffEff	DiffPval	DiffMixedPval	GeneAnnotation	RegulationAnnotation
2R_8072884_INS	G	GAGTTACGGGTGCCTCCGTTGGATCGGGGGTCCTCCTTTCTCTACTCTTAGTTAGTTGCTGCCCAGGTTTAAATAAATCAACTGCTCGGTTTGGTGTCAAGATCAAGAATGATGAAAGCTTTATTCTTAATGTATACGCACGGGCAAGCAGCAGTGCTTTTGATCCCGTTAGTTCTAGATAGCGAGTCTAGACGAGGACGTCGCGATTACGCAGTGTGTATGTGTGTGTGTAGGTTCATGTTAATTTCAACGTCGAGAGCGTCGCCACCACGCAGTATGTGTGAATATGTGTGTGTGTGTGTGTTCATGCCGATTTCATCATCGGGTGCAACAGAGTTTCAGGTAGCGGGGGACGAGGCTATGCTGGCATGGTAGCTCGTGATCAATATATATATATAC…	G	0.05839	8	129	-0.2439	7.232e-10	2.6777e-10	-0.2234	4.15e-07	3.06877e-06	-0.2337	3.38e-09	3.11084e-08	-0.02047	0.4636	0.451722	SiteClass[FBgn0033693|CG13175|UTR_3_PRIME|0;FBgn0053964|CG33964|UTR_3_PRIME|0;FBgn0025454|Cyp6g1|UPSTREAM|287],TranscriptAnnot[UPSTREAM(MODIFIER||||524|Cyp6g1|protein_coding|CODING|FBtr0087992|);UPSTREAM(MODIFIER||||524|Cyp6g1|protein_coding|CODING|FBtr0339596|);UTR_3_PRIME(MODIFIER||||141|CG13175|protein_coding|CODING|FBtr0100143|3);UTR_3_PRIME(MODIFIER||||482|CG33964|protein_coding|CODING|FBtr0…	(regulatory_region|REDfly_CRMs|FBsf0000435627),(regulatory_region|REDfly_CRMs|FBsf0000436578)
2R_8072837_SNP	C	T	C	0.05	8	152	-0.2427	2.378e-10	2.8713e-10	-0.2224	3.579e-07	2.85681e-06	-0.2325	2.022e-09	3.2541e-08	-0.02029	0.4544	0.453796	SiteClass[FBgn0033693|CG13175|UTR_3_PRIME|0;FBgn0053964|CG33964|UTR_3_PRIME|0;FBgn0025454|Cyp6g1|UPSTREAM|335],TranscriptAnnot[UPSTREAM(MODIFIER||||524|Cyp6g1|protein_coding|CODING|FBtr0087992|);UPSTREAM(MODIFIER||||524|Cyp6g1|protein_coding|CODING|FBtr0339596|);UTR_3_PRIME(MODIFIER||||141|CG13175|protein_coding|CODING|FBtr0100143|3);UTR_3_PRIME(MODIFIER||||482|CG33964|protein_coding|CODING|FBtr0…	(regulatory_region|REDfly_CRMs|FBsf0000435627),(regulatory_region|REDfly_CRMs|FBsf0000436578)
2R_8072902_SNP	T	C	T	0.05	8	152	-0.2427	2.378e-10	2.8713e-10	-0.2224	3.579e-07	2.85681e-06	-0.2325	2.022e-09	3.2541e-08	-0.02029	0.4544	0.453796	SiteClass[FBgn0033693|CG13175|UTR_3_PRIME|0;FBgn0053964|CG33964|UTR_3_PRIME|0;FBgn0025454|Cyp6g1|UPSTREAM|270],TranscriptAnnot[UPSTREAM(MODIFIER||||524|Cyp6g1|protein_coding|CODING|FBtr0087992|);UPSTREAM(MODIFIER||||524|Cyp6g1|protein_coding|CODING|FBtr0339596|);UTR_3_PRIME(MODIFIER||||141|CG13175|protein_coding|CODING|FBtr0100143|3);UTR_3_PRIME(MODIFIER||||482|CG33964|protein_coding|CODING|FBtr0…	(regulatory_region|REDfly_CRMs|FBsf0000435627),(regulatory_region|REDfly_CRMs|FBsf0000435898),(regulatory_region|REDfly_CRMs|FBsf0000436578)
2R_8073503_SNP	T	C	T	0.05	8	152	-0.24	6.137e-10	4.98697e-10	-0.2208	3.873e-07	3.58611e-06	-0.2304	2.769e-09	4.76173e-08	-0.01924	0.4922	0.477448	SiteClass[FBgn0025454|Cyp6g1|INTRON|0;FBgn0033693|CG13175|DOWNSTREAM|492;FBgn0053964|CG33964|DOWNSTREAM|492],TranscriptAnnot[DOWNSTREAM(MODIFIER||||141|CG13175|protein_coding|CODING|FBtr0100143|);DOWNSTREAM(MODIFIER||||482|CG33964|protein_coding|CODING|FBtr0100005|);INTRON(MODIFIER||||524|Cyp6g1|protein_coding|CODING|FBtr0087992|1);INTRON(MODIFIER||||524|Cyp6g1|protein_coding|CODING|FBtr0339596|1…	(regulatory_region|REDfly_CRMs|FBsf0000435668),(regulatory_region|REDfly_CRMs|FBsf0000436578)
2L_14593489_SNP	A	G	G	0.05625	9	151	0.004835	0.9014	0.658822	-0.1417	0.000794	0.00258655	-0.06845	0.07732	0.189487	0.1466	2.683e-09	1.67655e-09	SiteClass[|||],TranscriptAnnot[INTERGENIC(MODIFIER|||||||||)]	(TF_binding_site|BDTNP1_TFBS_twi|FBsf0000201747)
3R_7312014_SNP	G	C	C	0.06173	10	152	-0.1857	2.738e-07	8.0102e-08	-0.2096	1.125e-07	1.30999e-08	-0.1977	3.156e-08	1.8516e-09	0.02399	0.3373	0.324769	SiteClass[|||],TranscriptAnnot[INTERGENIC(MODIFIER|||||||||)]	-
2L_4277819_SNP	T	C	C	0.07407	12	150	-0.1919	4.214e-09	2.11356e-09	-0.121	0.001172	0.00306147	-0.1565	2.438e-06	5.03667e-06	-0.0708	0.001704	0.00134159	SiteClass[FBgn0031592|Art2|UTR_3_PRIME|0],TranscriptAnnot[UTR_3_PRIME(MODIFIER||||355|Art2|protein_coding|CODING|FBtr0077476|3)]	-
3R_9069659_SNP	T	C	C	0.2179	34	122	-0.1219	9.514e-09	2.23346e-09	-0.1013	1.848e-05	1.19492e-05	-0.1116	1.766e-07	2.81909e-08	-0.02061	0.1395	0.15363	SiteClass[FBgn0000024|Ace|SYNONYMOUS_CODING|0],TranscriptAnnot[SYNONYMOUS_CODING(LOW|SILENT|cgG/cgA|R219|636|Ace|protein_coding|CODING|FBtr0335223|);SYNONYMOUS_CODING(LOW|SILENT|cgG/cgA|R219|649|Ace|protein_coding|CODING|FBtr0082780|);SYNONYMOUS_CODING(LOW|SILENT|cgG/cgA|R219|649|Ace|protein_coding|CODING|FBtr0300486|)]	-
3R_6077388_SNP	T	C	C	0.06135	10	153	-0.1821	4.886e-07	1.4908e-07	-0.2075	1.037e-07	1.25763e-08	-0.1948	4.597e-08	2.33857e-09	0.02543	0.2916	0.296282	SiteClass[FBgn0037801|CG3999|SYNONYMOUS_CODING|0;FBgn0261928|CG42795|DOWNSTREAM|389],TranscriptAnnot[DOWNSTREAM(MODIFIER||||2904|CG42795|protein_coding|CODING|FBtr0332437|);SYNONYMOUS_CODING(LOW|SILENT|gtC/gtT|V29|985|CG3999|protein_coding|CODING|FBtr0082225|);SYNONYMOUS_CODING(LOW|SILENT|gtC/gtT|V29|985|CG3999|protein_coding|CODING|FBtr0337048|)]	-
2L_4277785_SNP	A	T	T	0.07273	12	153	-0.1903	3.852e-09	2.62487e-09	-0.1261	0.0006265	0.00181545	-0.1582	1.408e-06	3.63254e-06	-0.06416	0.004359	0.00372988	SiteClass[FBgn0031592|Art2|UTR_3_PRIME|0],TranscriptAnnot[UTR_3_PRIME(MODIFIER||||355|Art2|protein_coding|CODING|FBtr0077476|3)]	-
2L_4277786_SNP	A	G	G	0.07317	12	152	-0.19	4.453e-09	2.68501e-09	-0.1258	0.0006704	0.00181631	-0.1579	1.57e-06	3.60152e-06	-0.06426	0.004423	0.00368152	SiteClass[FBgn0031592|Art2|UTR_3_PRIME|0],TranscriptAnnot[UTR_3_PRIME(MODIFIER||||355|Art2|protein_coding|CODING|FBtr0077476|3)]	-
2L_9095535_DEL	T	TCCTT	TCCTT	0.05357	9	159	-0.1971	1.365e-07	1.80997e-07	-0.2399	3.7e-09	2.78216e-09	-0.2185	3.154e-09	4.91518e-09	0.04276	0.09684	0.0935395	SiteClass[|||],TranscriptAnnot[INTERGENIC(MODIFIER|||||||||)]	-
2R_8070658_SNP	T	G	T	0.06875	11	149	-0.1967	5.278e-09	3.48268e-09	-0.1579	2.999e-05	0.00010245	-0.1773	1.525e-07	7.95087e-07	-0.03878	0.1044	0.0952986	SiteClass[FBgn0033693|CG13175|NON_SYNONYMOUS_CODING|0;FBgn0053964|CG33964|UTR_5_PRIME|0;FBgn0000426|SmF|DOWNSTREAM|691;FBgn0033692|wash|DOWNSTREAM|780],TranscriptAnnot[DOWNSTREAM(MODIFIER||||499|wash|protein_coding|CODING|FBtr0087989|);DOWNSTREAM(MODIFIER||||499|wash|protein_coding|CODING|FBtr0339595|);DOWNSTREAM(MODIFIER||||88|SmF|protein_coding|CODING|FBtr0088010|);NON_SYNONYMOUS_CODING(MODERAT…	(TF_binding_site|mE1_TFBS_sens|FBsf0000227533)
3L_6866488_SNP	T	C	C	0.1938	31	129	-0.08522	0.0001246	0.000138524	-0.1443	8.436e-10	3.71293e-09	-0.1147	1.1e-07	2.80385e-07	0.05904	8.192e-05	5.20828e-05	SiteClass[|||],TranscriptAnnot[INTERGENIC(MODIFIER|||||||||)]	-
2R_9389095_SNP	T	A	A	0.08589	14	149	-0.1776	1.554e-09	4.09406e-09	-0.1507	7.723e-06	1.76365e-05	-0.1642	3.591e-08	1.32867e-07	-0.02696	0.2036	0.195659	SiteClass[FBgn0004638|drk|INTRON|0;FBgn0033845|mars|UPSTREAM|985],TranscriptAnnot[INTRON(MODIFIER||||211|drk|protein_coding|CODING|FBtr0087693|2);INTRON(MODIFIER||||211|drk|protein_coding|CODING|FBtr0087694|2);INTRON(MODIFIER||||211|drk|protein_coding|CODING|FBtr0087695|2);INTRON(MODIFIER||||211|drk|protein_coding|CODING|FBtr0087696|2);INTRON(MODIFIER||||211|drk|protein_coding|CODING|FBtr0087697|…	(TF_binding_site|BDTNP1_TFBS_dl|FBsf0000301889),(TF_binding_site|BDTNP1_TFBS_Med|FBsf0000280212),(TF_binding_site|BDTNP1_TFBS_twi|FBsf0000199269),(TF_binding_site|mE1_TFBS_cad|FBsf0000246553),(TF_binding_site|mE1_TFBS_D|FBsf0000240611),(TF_binding_site|mE1_TFBS_HSA|FBsf0000356358),(TF_binding_site|mE1_TFBS_Trl|FBsf0000338526)
2L_19365969_SNP	T	C	C	0.07453	12	149	-0.03443	0.3051	0.424891	-0.1592	8.224e-06	2.39151e-05	-0.09682	0.003264	0.00909894	0.1248	9.016e-09	4.92133e-09	SiteClass[FBgn0032770|CG13086|DOWNSTREAM|499],TranscriptAnnot[DOWNSTREAM(MODIFIER||||167|CG13086|protein_coding|CODING|FBtr0336818|);DOWNSTREAM(MODIFIER||||182|CG13086|protein_coding|CODING|FBtr0081197|);DOWNSTREAM(MODIFIER||||182|CG13086|protein_coding|CODING|FBtr0336817|);INTERGENIC(MODIFIER|||||||||)]	-
3R_6348794_INS	GAGG	G	G	0.06667	10	140	-0.1979	9.824e-08	8.99928e-09	-0.1617	0.0001002	6.6378e-06	-0.1798	1.392e-06	3.04102e-08	-0.03621	0.1589	0.137415	SiteClass[FBgn0001235|hth|INTRON|0],TranscriptAnnot[INTRON(MODIFIER||||218|hth|protein_coding|CODING|FBtr0301345|4);INTRON(MODIFIER||||458|hth|protein_coding|CODING|FBtr0301956|9);INTRON(MODIFIER||||472|hth|protein_coding|CODING|FBtr0082256|10);INTRON(MODIFIER||||487|hth|protein_coding|CODING|FBtr0082255|10)]	-
3R_8979771_SNP	T	G	G	0.2129	33	122	-0.1203	2.067e-08	1.23204e-08	-0.1028	1.909e-05	9.76459e-06	-0.1116	2.167e-07	6.27598e-08	-0.01743	0.2459	0.233528	SiteClass[FBgn0038118|timeout|INTRON|0;FBgn0260793|2mit|INTRON|0],TranscriptAnnot[INTRON(MODIFIER||||1141|2mit|protein_coding|CODING|FBtr0301436|2);INTRON(MODIFIER||||1155|2mit|protein_coding|CODING|FBtr0330143|2);INTRON(MODIFIER||||1384|timeout|protein_coding|CODING|FBtr0082712|11)]	-
3R_5696879_SNP	G	C	C	0.07273	12	153	-0.1627	8.844e-07	1.3416e-07	-0.1621	9.627e-06	4.3017e-07	-0.1624	8.512e-07	1.43361e-08	-0.0006071	0.9788	0.978372	SiteClass[|||],TranscriptAnnot[INTERGENIC(MODIFIER|||||||||)]	(TF_binding_site|mE1_TFBS_sens|FBsf0000231042)
X_22067684_DEL	T	TAGGAGCCAAGAGTCACTTTTAAAGCT	TAGGAGCCAAGAGTCACTTTTAAAGCT	0.1636	27	138	-0.08828	0.0001491	4.55905e-05	-0.1284	4.45e-07	1.45905e-08	-0.1084	2.68e-06	1.03373e-07	0.04016	0.01053	0.00989729	SiteClass[|||],TranscriptAnnot[INTERGENIC(MODIFIER|||||||||)]	-
3R_6407337_SNP	T	C	C	0.1111	17	136	-0.1499	1.502e-07	1.53753e-08	-0.09202	0.004258	0.000442024	-0.1209	2.854e-05	6.66293e-07	-0.05784	0.002342	0.00228134	SiteClass[FBgn0001235|hth|DOWNSTREAM|863],TranscriptAnnot[DOWNSTREAM(MODIFIER||||266|hth|protein_coding|CODING|FBtr0100454|);INTRON(MODIFIER||||458|hth|protein_coding|CODING|FBtr0301956|5);INTRON(MODIFIER||||472|hth|protein_coding|CODING|FBtr0082256|6);INTRON(MODIFIER||||487|hth|protein_coding|CODING|FBtr0082255|6)]	-
3L_5428592_SNP	G	C	C	0.06548	11	157	-0.1878	3.128e-08	1.64389e-08	-0.1486	8.338e-05	4.08193e-05	-0.1682	7.785e-07	3.75647e-07	-0.0392	0.08568	0.0912067	SiteClass[FBgn0085420|CG34391|INTRON|0],TranscriptAnnot[INTRON(MODIFIER||||469|CG34391|protein_coding|CODING|FBtr0333611|5);INTRON(MODIFIER||||469|CG34391|protein_coding|CODING|FBtr0333612|5);UPSTREAM(MODIFIER||||189|CG34391|protein_coding|CODING|FBtr0290012|)]	-
2R_8060142_SNP	G	A	G	0.07317	12	152	-0.1797	2.405e-08	2.01649e-08	-0.1458	5.789e-05	0.000178777	-0.1627	5.074e-07	2.41597e-06	-0.03389	0.1315	0.129061	SiteClass[FBgn0014184|Oda|INTRON|0],TranscriptAnnot[INTRON(MODIFIER||||254|Oda|protein_coding|CODING|FBtr0088013|1)]	(TF_binding_site|BDTNP1_TFBS_da|FBsf0000323954),(TF_binding_site|BDTNP1_TFBS_dl|FBsf0000301579),(TF_binding_site|BDTNP1_TFBS_hb|FBsf0000290101),(TF_binding_site|BDTNP1_TFBS_Med|FBsf0000280031),(TF_binding_site|BDTNP1_TFBS_slp1|FBsf0000272121),(TF_binding_site|BDTNP1_TFBS_twi|FBsf0000199144),(TF_binding_site|BDTNP1_TFBS_z|FBsf0000196515),(TF_binding_site|mE1_TFBS_cad|FBsf0000246424),(TF_binding_si…
2R_8060123_SNP	A	G	A	0.07317	12	152	-0.1791	2.856e-08	2.23745e-08	-0.1463	5.575e-05	0.000164886	-0.1627	5.089e-07	2.37936e-06	-0.03282	0.1506	0.141643	SiteClass[FBgn0014184|Oda|INTRON|0],TranscriptAnnot[INTRON(MODIFIER||||254|Oda|protein_coding|CODING|FBtr0088013|1)]	(TF_binding_site|BDTNP1_TFBS_da|FBsf0000323954),(TF_binding_site|BDTNP1_TFBS_dl|FBsf0000301579),(TF_binding_site|BDTNP1_TFBS_hb|FBsf0000290101),(TF_binding_site|BDTNP1_TFBS_Med|FBsf0000280031),(TF_binding_site|BDTNP1_TFBS_slp1|FBsf0000272121),(TF_binding_site|BDTNP1_TFBS_twi|FBsf0000199144),(TF_binding_site|BDTNP1_TFBS_z|FBsf0000196515),(TF_binding_site|mE1_TFBS_cad|FBsf0000246424),(TF_binding_si…
2R_8072916_SNP	T	A	T	0.05625	9	151	-0.2073	1.738e-08	2.35965e-08	-0.1901	5.151e-06	3.79978e-05	-0.1987	8.967e-08	1.04951e-06	-0.01714	0.5041	0.503529	SiteClass[FBgn0033693|CG13175|UTR_3_PRIME|0;FBgn0053964|CG33964|UTR_3_PRIME|0;FBgn0025454|Cyp6g1|UPSTREAM|256],TranscriptAnnot[UPSTREAM(MODIFIER||||524|Cyp6g1|protein_coding|CODING|FBtr0087992|);UPSTREAM(MODIFIER||||524|Cyp6g1|protein_coding|CODING|FBtr0339596|);UTR_3_PRIME(MODIFIER||||141|CG13175|protein_coding|CODING|FBtr0100143|3);UTR_3_PRIME(MODIFIER||||482|CG33964|protein_coding|CODING|FBtr0…	(regulatory_region|REDfly_CRMs|FBsf0000435627),(regulatory_region|REDfly_CRMs|FBsf0000435898),(regulatory_region|REDfly_CRMs|FBsf0000436578)
X_15211890_DEL	A	ATA	ATA	0.06587	11	156	-0.1882	3.052e-08	1.3473e-07	-0.2245	1.323e-09	2.38744e-08	-0.2063	7.47e-10	2.63556e-08	0.03626	0.1233	0.11848	SiteClass[FBgn0261703|gce|UTR_3_PRIME|0],TranscriptAnnot[UTR_3_PRIME(MODIFIER||||918|gce|protein_coding|CODING|FBtr0310309|10);UTR_3_PRIME(MODIFIER||||959|gce|protein_coding|CODING|FBtr0303198|10);UTR_3_PRIME(MODIFIER||||959|gce|protein_coding|CODING|FBtr0303199|10);UTR_3_PRIME(MODIFIER||||959|gce|protein_coding|CODING|FBtr0310308|10);UTR_3_PRIME(MODIFIER||||959|gce|protein_coding|CODING|FBtr0331…	-
2R_17639707_SNP	G	A	A	0.0625	10	150	-0.191	3.83e-08	2.49868e-08	-0.1642	3.742e-05	7.3543e-06	-0.1776	4.764e-07	5.34581e-08	-0.0268	0.2777	0.271292	SiteClass[|||],TranscriptAnnot[INTERGENIC(MODIFIER|||||||||)]	-
X_15211895_INS	ACAATT	A	A	0.06627	11	155	-0.1874	3.359e-08	1.5613e-07	-0.2236	1.458e-09	2.79122e-08	-0.2055	8.146e-10	3.09828e-08	0.03618	0.1253	0.119349	SiteClass[FBgn0261703|gce|UTR_3_PRIME|0],TranscriptAnnot[UTR_3_PRIME(MODIFIER||||918|gce|protein_coding|CODING|FBtr0310309|10);UTR_3_PRIME(MODIFIER||||959|gce|protein_coding|CODING|FBtr0303198|10);UTR_3_PRIME(MODIFIER||||959|gce|protein_coding|CODING|FBtr0303199|10);UTR_3_PRIME(MODIFIER||||959|gce|protein_coding|CODING|FBtr0310308|10);UTR_3_PRIME(MODIFIER||||959|gce|protein_coding|CODING|FBtr0331…	-
2R_8068113_SNP	T	G	T	0.07407	12	150	-0.1779	3.918e-08	2.97883e-08	-0.1449	6.92e-05	0.000201413	-0.1614	6.746e-07	3.08004e-06	-0.03298	0.1512	0.13994	SiteClass[FBgn0033692|wash|INTRON|0;FBgn0033691|CG8860|UPSTREAM|706],TranscriptAnnot[INTRON(MODIFIER||||499|wash|protein_coding|CODING|FBtr0339595|1);UPSTREAM(MODIFIER||||499|wash|protein_coding|CODING|FBtr0087989|);UPSTREAM(MODIFIER||||68|CG8860|protein_coding|CODING|FBtr0088011|)]	(TF_binding_site|BDTNP1_TFBS_dl|FBsf0000301585),(TF_binding_site|BDTNP1_TFBS_Med|FBsf0000280036),(TF_binding_site|BDTNP1_TFBS_twi|FBsf0000199149),(TF_binding_site|mE1_TFBS_cad|FBsf0000246426),(TF_binding_site|mE1_TFBS_HSA|FBsf0000355896),(TF_binding_site|mE1_TFBS_Ubx|FBsf0000263038)
3R_8979781_SNP	A	G	G	0.3986	59	89	-0.09681	3.737e-07	4.07795e-08	-0.09615	4.063e-06	1.30442e-06	-0.09648	3.911e-07	3.07642e-08	-0.0006575	0.9571	0.958184	SiteClass[FBgn0038118|timeout|INTRON|0;FBgn0260793|2mit|INTRON|0],TranscriptAnnot[INTRON(MODIFIER||||1141|2mit|protein_coding|CODING|FBtr0301436|2);INTRON(MODIFIER||||1155|2mit|protein_coding|CODING|FBtr0330143|2);INTRON(MODIFIER||||1384|timeout|protein_coding|CODING|FBtr0082712|11)]	-
3R_8979770_SNP	G	A	A	0.2115	33	123	-0.117	7.831e-08	3.18755e-08	-0.09921	4.686e-05	2.07589e-05	-0.1081	7.686e-07	1.69154e-07	-0.01778	0.2345	0.223708	SiteClass[FBgn0038118|timeout|INTRON|0;FBgn0260793|2mit|INTRON|0],TranscriptAnnot[INTRON(MODIFIER||||1141|2mit|protein_coding|CODING|FBtr0301436|2);INTRON(MODIFIER||||1155|2mit|protein_coding|CODING|FBtr0330143|2);INTRON(MODIFIER||||1384|timeout|protein_coding|CODING|FBtr0082712|11)]	-
2L_6237483_SNP	A	T	T	0.05952	10	158	-0.1476	4.267e-05	2.28702e-05	-0.2005	2.244e-07	3.77193e-08	-0.1741	8.823e-07	9.90514e-08	0.05287	0.02908	0.0288701	SiteClass[|||],TranscriptAnnot[INTERGENIC(MODIFIER|||||||||)]	-
2L_10787708_DEL	C	CAAACTTGGC	CAAACTTGGC	0.08929	15	153	-0.1625	3.265e-08	4.17962e-08	-0.1696	1.771e-07	5.54064e-07	-0.166	1.361e-08	5.02572e-08	0.007184	0.725	0.722267	SiteClass[FBgn0051869|CG31869|INTRON|0],TranscriptAnnot[INTRON(MODIFIER||||602|CG31869|protein_coding|CODING|FBtr0290245|2);INTRON(MODIFIER||||777|CG31869|protein_coding|CODING|FBtr0080189|2);INTRON(MODIFIER||||777|CG31869|protein_coding|CODING|FBtr0290246|3)]	-
X_15241453_SNP	T	C	C	0.07101	12	157	-0.1791	3.559e-08	1.34088e-07	-0.2067	6.153e-09	7.91023e-08	-0.1929	1.965e-09	4.54914e-08	0.02755	0.2207	0.217278	SiteClass[FBgn0030631|CG6227|INTRON|0],TranscriptAnnot[INTRON(MODIFIER||||1224|CG6227|protein_coding|CODING|FBtr0074011|3)]	(TF_binding_site|mE1_TFBS_cad|FBsf0000243445),(TF_binding_site|mE1_TFBS_HSA|FBsf0000348104),(TF_binding_site|mE1_TFBS_sens|FBsf0000220968)
3R_5650896_DEL	T	TC	TC	0.05455	9	156	-0.2024	6.818e-08	4.67441e-08	-0.1733	2.252e-05	9.35071e-06	-0.1879	4.382e-07	9.32278e-08	-0.02905	0.2458	0.255897	SiteClass[FBgn0262105|CR42858|UPSTREAM|311;FBgn0037766|Teh1|DOWNSTREAM|906],TranscriptAnnot[DOWNSTREAM(MODIFIER||||279|Teh1|protein_coding|CODING|FBtr0082151|);DOWNSTREAM(MODIFIER||||299|Teh1|protein_coding|CODING|FBtr0330082|);INTERGENIC(MODIFIER|||||||||);UPSTREAM(MODIFIER|||||CR42858|ncRNA|NON_CODING|FBtr0304027|)]	(TF_binding_site|mE1_TFBS_cad|FBsf0000248019),(TF_binding_site|mE1_TFBS_chinmo|FBsf0000212425)
3R_5636504_SNP	C	T	T	0.06587	11	156	-0.1876	3.492e-08	5.01891e-08	-0.1591	2.997e-05	0.000115685	-0.1734	3.855e-07	1.49575e-06	-0.02857	0.2251	0.219214	SiteClass[FBgn0264827|CR44035|EXON|0],TranscriptAnnot[EXON(MODIFIER|||||CR44035|ncRNA|NON_CODING|FBtr0334683|2)]	-
3R_9076310_SNP	A	C	C	0.2092	32	121	-0.1195	4.19e-08	7.19764e-08	-0.1333	3.315e-08	1.95878e-07	-0.1264	5.503e-09	5.08889e-08	0.01379	0.3679	0.352489	SiteClass[FBgn0000024|Ace|INTRON|0],TranscriptAnnot[INTRON(MODIFIER||||636|Ace|protein_coding|CODING|FBtr0335223|1);INTRON(MODIFIER||||649|Ace|protein_coding|CODING|FBtr0082780|1);INTRON(MODIFIER||||649|Ace|protein_coding|CODING|FBtr0300486|2)]	-
3R_10005491_SNP	A	T	T	0.0641	10	146	-0.1931	1.364e-07	5.33531e-08	-0.1815	5.293e-06	7.21373e-06	-0.1873	2.442e-07	2.07478e-07	-0.0116	0.6348	0.634655	SiteClass[FBgn0011582|DopR|INTRON|0],TranscriptAnnot[INTRON(MODIFIER||||481|DopR|protein_coding|CODING|FBtr0301351|5);INTRON(MODIFIER||||496|DopR|protein_coding|CODING|FBtr0290283|5);INTRON(MODIFIER||||511|DopR|protein_coding|CODING|FBtr0308191|5);INTRON(MODIFIER||||560|DopR|protein_coding|CODING|FBtr0330711|5)]	-
3L_4115889_SNP	C	T	T	0.07692	13	156	-0.166	1.304e-07	8.88615e-08	-0.1713	8.222e-07	7.69677e-07	-0.1686	7.145e-08	6.62517e-08	0.005357	0.8053	0.803852	SiteClass[FBgn0035499|Chd64|INTRON|0],TranscriptAnnot[INTRON(MODIFIER||||188|Chd64|protein_coding|CODING|FBtr0073270|1);UPSTREAM(MODIFIER||||175|Chd64|protein_coding|CODING|FBtr0310531|)]	-
3R_8986205_SNP	T	A	A	0.2704	43	116	-0.1004	4.992e-07	2.22991e-07	-0.1029	2.822e-06	1.20091e-06	-0.1016	2.963e-07	6.98873e-08	0.002504	0.8558	0.851105	SiteClass[FBgn0038118|timeout|INTRON|0],TranscriptAnnot[INTRON(MODIFIER||||1384|timeout|protein_coding|CODING|FBtr0082712|14)]	-
X_11614946_SNP	T	A	T	0.08929	15	153	-0.1412	2.096e-06	1.04373e-06	-0.1575	1.446e-06	4.61825e-07	-0.1494	4.302e-07	7.0083e-08	0.0163	0.4244	0.419604	SiteClass[FBgn0030330|Tango10|SYNONYMOUS_CODING|0],TranscriptAnnot[SYNONYMOUS_CODING(LOW|SILENT|gcT/gcA|A84|587|Tango10|protein_coding|CODING|FBtr0073552|);SYNONYMOUS_CODING(LOW|SILENT|gcT/gcA|A84|587|Tango10|protein_coding|CODING|FBtr0073553|);SYNONYMOUS_CODING(LOW|SILENT|gcT/gcA|A84|587|Tango10|protein_coding|CODING|FBtr0332955|)]	(TF_binding_site|BDTNP1_TFBS_dl|FBsf0000318449),(TF_binding_site|BDTNP1_TFBS_sna|FBsf0000270208),(TF_binding_site|BDTNP1_TFBS_twi|FBsf0000205756),(TF_binding_site|mE1_TFBS_cad|FBsf0000243274),(TF_binding_site|mE1_TFBS_HSA|FBsf0000381602)
3R_13258656_SNP	A	G	G	0.05063	8	150	-0.2116	6.774e-08	7.46939e-08	-0.1502	0.0006855	0.00115233	-0.1809	4.646e-06	8.08937e-06	-0.0614	0.02489	0.0224758	SiteClass[FBgn0038511|CG5873|INTRON|0],TranscriptAnnot[INTRON(MODIFIER||||753|CG5873|protein_coding|CODING|FBtr0083442|1)]	(TF_binding_site|BDTNP1_TFBS_twi|FBsf0000265321)
3R_8979756_SNP	T	C	C	0.3608	57	101	-0.09147	8.746e-07	7.72947e-08	-0.08112	8.392e-05	1.10996e-05	-0.0863	3.404e-06	1.72088e-07	-0.01035	0.416	0.402537	SiteClass[FBgn0038118|timeout|INTRON|0;FBgn0260793|2mit|INTRON|0],TranscriptAnnot[INTRON(MODIFIER||||1141|2mit|protein_coding|CODING|FBtr0301436|2);INTRON(MODIFIER||||1155|2mit|protein_coding|CODING|FBtr0330143|2);INTRON(MODIFIER||||1384|timeout|protein_coding|CODING|FBtr0082712|11)]	-
2L_14218429_SNP	T	G	G	0.08442	13	141	0.008605	0.7872	0.769677	-0.1027	0.003535	0.0080665	-0.04704	0.1387	0.216721	0.1113	3.197e-07	8.41636e-08	SiteClass[FBgn0016930|smi35A|INTRON|0],TranscriptAnnot[INTRON(MODIFIER||||722|smi35A|protein_coding|CODING|FBtr0089288|2);INTRON(MODIFIER||||722|smi35A|protein_coding|CODING|FBtr0089289|3);INTRON(MODIFIER||||722|smi35A|protein_coding|CODING|FBtr0089290|3);INTRON(MODIFIER||||722|smi35A|protein_coding|CODING|FBtr0100447|3);INTRON(MODIFIER||||722|smi35A|protein_coding|CODING|FBtr0100448|3);INTRON(MO…	-
3L_5428593_SNP	G	C	C	0.07101	12	157	-0.1734	1.04e-07	8.75967e-08	-0.1561	1.771e-05	9.24735e-06	-0.1648	4.493e-07	3.41247e-07	-0.01734	0.4414	0.438035	SiteClass[FBgn0085420|CG34391|INTRON|0],TranscriptAnnot[INTRON(MODIFIER||||469|CG34391|protein_coding|CODING|FBtr0333611|5);INTRON(MODIFIER||||469|CG34391|protein_coding|CODING|FBtr0333612|5);UPSTREAM(MODIFIER||||189|CG34391|protein_coding|CODING|FBtr0290012|)]	-
3L_20172441_SNP	A	G	G	0.1296	21	141	-0.1367	1.053e-07	8.7792e-08	-0.1198	3.131e-05	1.57284e-05	-0.1283	6.586e-07	2.68778e-07	-0.01693	0.3416	0.331874	SiteClass[FBgn0261556|CG42674|INTRON|0],TranscriptAnnot[INTRON(MODIFIER||||1412|CG42674|protein_coding|CODING|FBtr0302716|2);INTRON(MODIFIER||||1412|CG42674|protein_coding|CODING|FBtr0332698|3);INTRON(MODIFIER||||1445|CG42674|protein_coding|CODING|FBtr0302715|3);INTRON(MODIFIER||||1480|CG42674|protein_coding|CODING|FBtr0302713|2);INTRON(MODIFIER||||1626|CG42674|protein_coding|CODING|FBtr0302712|2…	(TF_binding_site|mE1_TFBS_inv|FBsf0000236193)
3R_9033676_SNP	G	C	C	0.3533	53	97	-0.0921	1.942e-06	1.70621e-06	-0.1097	1.249e-07	1.42103e-07	-0.1009	1.341e-07	8.92739e-08	0.01758	0.1448	0.167101	SiteClass[FBgn0038126|CG8483|DOWNSTREAM|800],TranscriptAnnot[DOWNSTREAM(MODIFIER||||392|CG8483|protein_coding|CODING|FBtr0082782|);INTERGENIC(MODIFIER|||||||||)]	(TF_binding_site|mE1_TFBS_Trl|FBsf0000340966)
3R_6370589_SNP	G	A	A	0.05455	9	156	-0.198	1.235e-07	9.64401e-08	-0.1136	0.007798	0.00231448	-0.1558	4.279e-05	7.39903e-06	-0.08442	0.0009541	0.000806025	SiteClass[FBgn0001235|hth|INTRON|0],TranscriptAnnot[INTRON(MODIFIER||||218|hth|protein_coding|CODING|FBtr0301345|2);INTRON(MODIFIER||||458|hth|protein_coding|CODING|FBtr0301956|7);INTRON(MODIFIER||||472|hth|protein_coding|CODING|FBtr0082256|8);INTRON(MODIFIER||||487|hth|protein_coding|CODING|FBtr0082255|8)]	-
2L_8758627_SNP	C	T	T	0.06122	9	138	-0.1993	5.649e-08	1.02792e-07	-0.1737	1.604e-05	2.47053e-05	-0.1865	2.83e-07	7.63037e-07	-0.02552	0.3202	0.320043	SiteClass[|||],TranscriptAnnot[INTERGENIC(MODIFIER|||||||||)]	-
3R_6312944_SNP	A	G	G	0.05521	9	154	-0.1985	1.524e-07	1.05184e-07	-0.1275	0.002881	0.00123789	-0.163	2.01e-05	5.2407e-06	-0.07107	0.006226	0.00501369	SiteClass[|||],TranscriptAnnot[INTERGENIC(MODIFIER|||||||||)]	-
X_12758474_DEL	ACA	A	ACA	0.4013	63	94	-0.07472	5.741e-05	1.51297e-05	-0.09413	3.365e-06	1.06149e-07	-0.08442	4.355e-06	1.94161e-07	0.01941	0.124	0.109306	SiteClass[FBgn0259171|Pde9|INTRON|0],TranscriptAnnot[INTRON(MODIFIER||||1526|Pde9|protein_coding|CODING|FBtr0299635|2);INTRON(MODIFIER||||1526|Pde9|protein_coding|CODING|FBtr0333524|1);INTRON(MODIFIER||||1526|Pde9|protein_coding|CODING|FBtr0333525|2);INTRON(MODIFIER||||1623|Pde9|protein_coding|CODING|FBtr0330395|2)]	-
2R_8059576_SNP	T	C	C	0.06024	10	156	-0.1822	3.636e-07	1.08207e-07	-0.1379	0.0006102	0.000259596	-0.16	8.991e-06	2.62816e-06	-0.04429	0.0722	0.0678555	SiteClass[FBgn0014184|Oda|INTRON|0],TranscriptAnnot[INTRON(MODIFIER||||254|Oda|protein_coding|CODING|FBtr0088013|1);UPSTREAM(MODIFIER||||270|Oda|protein_coding|CODING|FBtr0088014|)]	(TF_binding_site|BDTNP1_TFBS_dl|FBsf0000301579),(TF_binding_site|BDTNP1_TFBS_hb|FBsf0000290101),(TF_binding_site|BDTNP1_TFBS_twi|FBsf0000199144),(TF_binding_site|mE1_TFBS_zfh1|FBsf0000334660)
3R_9031928_SNP	T	C	C	0.4362	65	84	-0.09236	7.373e-07	2.09614e-07	-0.09529	3.849e-06	1.96591e-06	-0.09383	4.621e-07	1.10319e-07	0.002937	0.8171	0.811933	SiteClass[|||],TranscriptAnnot[INTERGENIC(MODIFIER|||||||||)]	-
X_11614932_SNP	A	G	A	0.09036	15	151	-0.1389	3.608e-06	1.62961e-06	-0.1559	2.01e-06	6.54806e-07	-0.1474	7.044e-07	1.11737e-07	0.01698	0.4057	0.400716	SiteClass[FBgn0030330|Tango10|NON_SYNONYMOUS_CODING|0],TranscriptAnnot[NON_SYNONYMOUS_CODING(MODERATE|MISSENSE|Att/Gtt|I80V|587|Tango10|protein_coding|CODING|FBtr0073552|);NON_SYNONYMOUS_CODING(MODERATE|MISSENSE|Att/Gtt|I80V|587|Tango10|protein_coding|CODING|FBtr0073553|);NON_SYNONYMOUS_CODING(MODERATE|MISSENSE|Att/Gtt|I80V|587|Tango10|protein_coding|CODING|FBtr0332955|)]	(TF_binding_site|BDTNP1_TFBS_dl|FBsf0000318449),(TF_binding_site|BDTNP1_TFBS_sna|FBsf0000270208),(TF_binding_site|BDTNP1_TFBS_twi|FBsf0000205756),(TF_binding_site|mE1_TFBS_cad|FBsf0000243274),(TF_binding_site|mE1_TFBS_HSA|FBsf0000381602)
3R_6382372_SNP	C	G	G	0.05422	9	157	-0.197	1.58e-07	1.12992e-07	-0.1132	0.007854	0.0023683	-0.1551	4.62e-05	8.01069e-06	-0.08376	0.001074	0.000886035	SiteClass[FBgn0001235|hth|INTRON|0],TranscriptAnnot[INTRON(MODIFIER||||218|hth|protein_coding|CODING|FBtr0301345|1);INTRON(MODIFIER||||458|hth|protein_coding|CODING|FBtr0301956|6);INTRON(MODIFIER||||472|hth|protein_coding|CODING|FBtr0082256|7);INTRON(MODIFIER||||487|hth|protein_coding|CODING|FBtr0082255|7)]	-
3R_6385704_SNP	T	C	C	0.05422	9	157	-0.197	1.58e-07	1.12992e-07	-0.1132	0.007854	0.0023683	-0.1551	4.62e-05	8.01069e-06	-0.08376	0.001074	0.000886035	SiteClass[FBgn0001235|hth|INTRON|0],TranscriptAnnot[INTRON(MODIFIER||||218|hth|protein_coding|CODING|FBtr0301345|1);INTRON(MODIFIER||||458|hth|protein_coding|CODING|FBtr0301956|6);INTRON(MODIFIER||||472|hth|protein_coding|CODING|FBtr0082256|7);INTRON(MODIFIER||||487|hth|protein_coding|CODING|FBtr0082255|7)]	(TF_binding_site|BDTNP1_TFBS_dl|FBsf0000310935)
3R_9076317_DEL	A	AG	AG	0.2026	31	122	-0.1182	7.882e-08	1.58692e-07	-0.1325	5.609e-08	3.72018e-07	-0.1253	1.043e-08	1.13025e-07	0.01427	0.3572	0.341763	SiteClass[FBgn0000024|Ace|INTRON|0],TranscriptAnnot[INTRON(MODIFIER||||636|Ace|protein_coding|CODING|FBtr0335223|1);INTRON(MODIFIER||||649|Ace|protein_coding|CODING|FBtr0082780|1);INTRON(MODIFIER||||649|Ace|protein_coding|CODING|FBtr0300486|2)]	-
2R_8061931_SNP	A	C	C	0.06061	10	155	-0.1857	1.346e-07	1.22948e-07	-0.1417	0.0003485	0.0011294	-0.1637	3.747e-06	1.88879e-05	-0.04395	0.07526	0.0700429	SiteClass[FBgn0014184|Oda|UPSTREAM|162;FBgn0010621|Cct5|UPSTREAM|376],TranscriptAnnot[INTERGENIC(MODIFIER|||||||||);UPSTREAM(MODIFIER||||254|Oda|protein_coding|CODING|FBtr0088013|);UPSTREAM(MODIFIER||||512|Cct5|protein_coding|CODING|FBtr0087988|);UPSTREAM(MODIFIER||||542|Cct5|protein_coding|CODING|FBtr0087987|)]	(TF_binding_site|BDTNP1_TFBS_dl|FBsf0000301581),(TF_binding_site|BDTNP1_TFBS_Med|FBsf0000280033),(TF_binding_site|BDTNP1_TFBS_twi|FBsf0000199146),(TF_binding_site|mE1_TFBS_D|FBsf0000240555),(TF_binding_site|mE1_TFBS_disco|FBsf0000259690),(TF_binding_site|mE1_TFBS_GATAe|FBsf0000258380),(TF_binding_site|mE1_TFBS_HSA|FBsf0000355891),(TF_binding_site|mE1_TFBS_Ubx|FBsf0000263036)
2R_4730821_SNP	G	A	A	0.05488	9	155	-2.742e-05	0.9994	0.788564	-0.1297	0.002348	0.0102279	-0.06489	0.09688	0.231491	0.1297	2.185e-07	1.34162e-07	SiteClass[FBgn0024189|sns|INTRON|0],TranscriptAnnot[INTRON(MODIFIER||||1479|sns|protein_coding|CODING|FBtr0088635|19);INTRON(MODIFIER||||1492|sns|protein_coding|CODING|FBtr0339277|19);INTRON(MODIFIER||||1542|sns|protein_coding|CODING|FBtr0111043|20)]	(TF_binding_site|mE1_TFBS_chinmo|FBsf0000210921),(TF_binding_site|mE1_TFBS_HSA|FBsf0000354690)
3R_8986215_SNP	A	T	T	0.2704	43	116	-0.09946	6.539e-07	2.87168e-07	-0.1017	3.917e-06	2.04148e-06	-0.1006	4.168e-07	1.39009e-07	0.002246	0.8707	0.866303	SiteClass[FBgn0038118|timeout|INTRON|0],TranscriptAnnot[INTRON(MODIFIER||||1384|timeout|protein_coding|CODING|FBtr0082712|14)]	-
3R_9069721_SNP	C	T	T	0.3851	57	91	0.09411	1.235e-06	3.72416e-07	0.1004	2.512e-06	1.73235e-06	0.09727	4.427e-07	1.43256e-07	-0.006318	0.6366	0.616557	SiteClass[FBgn0000024|Ace|NON_SYNONYMOUS_CODING|0],TranscriptAnnot[NON_SYNONYMOUS_CODING(MODERATE|MISSENSE|Atc/Gtc|I199V|636|Ace|protein_coding|CODING|FBtr0335223|);NON_SYNONYMOUS_CODING(MODERATE|MISSENSE|Atc/Gtc|I199V|649|Ace|protein_coding|CODING|FBtr0082780|);NON_SYNONYMOUS_CODING(MODERATE|MISSENSE|Atc/Gtc|I199V|649|Ace|protein_coding|CODING|FBtr0300486|)]	-
3R_9087504_INS	TATAGGGAT	T	T	0.2038	32	125	-0.1084	7.805e-07	4.26155e-07	-0.1074	1.06e-05	2.5068e-06	-0.1079	9.115e-07	1.4725e-07	-0.000951	0.9489	0.94877	SiteClass[FBgn0040551|CG11686|INTRON|0;FBgn0038128|Ravus|DOWNSTREAM|949],TranscriptAnnot[DOWNSTREAM(MODIFIER||||359|Ravus|protein_coding|CODING|FBtr0082779|);INTRON(MODIFIER||||70|CG11686|protein_coding|CODING|FBtr0082735|2);INTRON(MODIFIER||||70|CG11686|protein_coding|CODING|FBtr0335222|2)]	-
3R_6358830_SNP	G	T	T	0.05063	8	150	-0.2077	6.241e-08	1.5619e-07	-0.1482	0.0007144	0.000258136	-0.1779	4.344e-06	1.92049e-06	-0.05945	0.03352	0.0271986	SiteClass[FBgn0001235|hth|INTRON|0],TranscriptAnnot[INTRON(MODIFIER||||218|hth|protein_coding|CODING|FBtr0301345|3);INTRON(MODIFIER||||458|hth|protein_coding|CODING|FBtr0301956|8);INTRON(MODIFIER||||472|hth|protein_coding|CODING|FBtr0082256|9);INTRON(MODIFIER||||487|hth|protein_coding|CODING|FBtr0082255|9)]	-
3R_9076308_SNP	C	T	T	0.2157	33	120	-0.1154	9.982e-08	1.72617e-07	-0.1275	1.076e-07	6.68854e-07	-0.1214	1.782e-08	1.65268e-07	0.01215	0.4222	0.407448	SiteClass[FBgn0000024|Ace|INTRON|0],TranscriptAnnot[INTRON(MODIFIER||||636|Ace|protein_coding|CODING|FBtr0335223|1);INTRON(MODIFIER||||649|Ace|protein_coding|CODING|FBtr0082780|1);INTRON(MODIFIER||||649|Ace|protein_coding|CODING|FBtr0300486|2)]	-
3L_9900525_SNP	A	T	T	0.1812	29	131	-0.1032	2.209e-06	1.57812e-06	-0.1107	5.644e-06	1.29238e-06	-0.107	8.593e-07	1.68557e-07	0.007431	0.6388	0.627839	SiteClass[FBgn0085385|CG34356|UPSTREAM|695],TranscriptAnnot[INTERGENIC(MODIFIER|||||||||);UPSTREAM(MODIFIER||||834|CG34356|protein_coding|CODING|FBtr0331577|);UPSTREAM(MODIFIER||||854|CG34356|protein_coding|CODING|FBtr0331579|)]	-
X_5332300_SNP	T	C	C	0.1481	24	138	-0.1202	6.053e-07	7.13922e-07	-0.1237	4.419e-06	1.5108e-06	-0.1219	4.553e-07	1.69981e-07	0.003513	0.8321	0.831654	SiteClass[|||],TranscriptAnnot[INTERGENIC(MODIFIER|||||||||)]	-
3L_2025658_SNP	G	C	C	0.1145	19	147	-0.09552	0.0004846	0.000247082	-0.1417	1.677e-06	1.71661e-07	-0.1186	1.113e-05	1.05199e-06	0.0462	0.01166	0.0104377	SiteClass[|||],TranscriptAnnot[INTERGENIC(MODIFIER|||||||||)]	-
3R_9031918_SNP	A	C	C	0.44	66	84	-0.09112	9.307e-07	3.35967e-07	-0.09422	5.414e-06	2.86394e-06	-0.09267	6.369e-07	1.76214e-07	0.003091	0.8086	0.801443	SiteClass[|||],TranscriptAnnot[INTERGENIC(MODIFIER|||||||||)]	-
3R_9087531_SNP	T	G	G	0.3309	46	93	-0.09425	6.711e-06	1.79242e-06	-0.1063	3.997e-06	9.59626e-07	-0.1003	1.505e-06	1.82423e-07	0.01204	0.3951	0.370596	SiteClass[FBgn0040551|CG11686|INTRON|0;FBgn0038128|Ravus|DOWNSTREAM|923],TranscriptAnnot[DOWNSTREAM(MODIFIER||||359|Ravus|protein_coding|CODING|FBtr0082779|);INTRON(MODIFIER||||70|CG11686|protein_coding|CODING|FBtr0082735|2);INTRON(MODIFIER||||70|CG11686|protein_coding|CODING|FBtr0335222|2)]	-
X_15241431_SNP	T	C	C	0.06548	11	157	-0.1829	6.707e-08	1.83381e-07	-0.201	5.047e-08	9.25048e-07	-0.1919	9.387e-09	1.86599e-07	0.01809	0.4379	0.437271	SiteClass[FBgn0030631|CG6227|INTRON|0],TranscriptAnnot[INTRON(MODIFIER||||1224|CG6227|protein_coding|CODING|FBtr0074011|3)]	(TF_binding_site|mE1_TFBS_cad|FBsf0000243445),(TF_binding_site|mE1_TFBS_HSA|FBsf0000348104),(TF_binding_site|mE1_TFBS_sens|FBsf0000220968)
3R_13277147_SNP	G	C	C	0.08642	14	148	-0.1569	1.64e-07	2.05316e-07	-0.1459	2.203e-05	2.16718e-05	-0.1514	7.368e-07	7.66705e-07	-0.01101	0.5912	0.598208	SiteClass[|||],TranscriptAnnot[INTERGENIC(MODIFIER|||||||||)]	-
3R_6728127_SNP	C	T	T	0.09317	15	146	-0.1547	2.914e-07	2.09145e-07	-0.1604	1.088e-06	3.66617e-06	-0.1575	1.31e-07	2.84827e-07	0.005753	0.7787	0.776434	SiteClass[|||],TranscriptAnnot[INTERGENIC(MODIFIER|||||||||)]	-
3L_13670237_SNP	G	A	A	0.05357	9	159	0.01116	0.7747	0.731798	-0.1166	0.005935	0.0110295	-0.05271	0.1739	0.2465	0.1277	2.799e-07	2.10234e-07	SiteClass[FBgn0264001|bru-3|INTRON|0],TranscriptAnnot[INTRON(MODIFIER||||403|bru-3|protein_coding|CODING|FBtr0330356|4);INTRON(MODIFIER||||403|bru-3|protein_coding|CODING|FBtr0330357|4)]	-
2L_6334848_SNP	C	A	A	0.09639	16	150	-0.1467	3.969e-07	2.10694e-07	-0.1273	8.143e-05	6.94362e-05	-0.137	2.317e-06	1.45041e-06	-0.01944	0.329	0.321844	SiteClass[FBgn0031799|Pez|SYNONYMOUS_CODING|0],TranscriptAnnot[SYNONYMOUS_CODING(LOW|SILENT|ccT/ccG|P816|1252|Pez|protein_coding|CODING|FBtr0079284|);SYNONYMOUS_CODING(LOW|SILENT|ccT/ccG|P816|1252|Pez|protein_coding|CODING|FBtr0331226|)]	(TF_binding_site|mE1_TFBS_cad|FBsf0000241510),(TF_binding_site|mE1_TFBS_chinmo|FBsf0000207348)
3R_9078332_SNP	G	C	C	0.2308	36	120	-0.1055	7.919e-07	2.14575e-07	-0.0969	3.481e-05	1.92484e-05	-0.1012	1.847e-06	3.51085e-07	-0.008602	0.5509	0.544403	SiteClass[FBgn0000024|Ace|INTRON|0],TranscriptAnnot[INTRON(MODIFIER||||636|Ace|protein_coding|CODING|FBtr0335223|1);INTRON(MODIFIER||||649|Ace|protein_coding|CODING|FBtr0082780|1);INTRON(MODIFIER||||649|Ace|protein_coding|CODING|FBtr0300486|2)]	-
3R_9114055_SNP	T	A	A	0.3333	52	104	-0.09672	4.458e-07	2.1961e-07	-0.08807	2.812e-05	2.43969e-05	-0.09239	1.22e-06	4.91383e-07	-0.008649	0.5046	0.495199	SiteClass[FBgn0038132|CG15887|INTRON|0],TranscriptAnnot[INTRON(MODIFIER||||137|CG15887|protein_coding|CODING|FBtr0082776|1)]	(TF_binding_site|mE1_TFBS_inv|FBsf0000237171)
3R_11631830_SNP	C	G	G	0.08383	14	153	-0.1561	3.515e-07	2.19859e-07	-0.1458	1.893e-05	2.11423e-05	-0.1509	8.368e-07	8.54158e-07	-0.01027	0.627	0.622312	SiteClass[FBgn0026616|alpha-Man-IIb|INTRON|0],TranscriptAnnot[INTRON(MODIFIER||||1249|alpha-Man-IIb|protein_coding|CODING|FBtr0083179|1)]	-
3L_6864577_SNP	G	C	G	0.1879	31	134	-0.06385	0.004583	0.00407553	-0.1258	1.528e-07	2.20823e-07	-0.09482	1.72e-05	2.0658e-05	0.06194	2.641e-05	1.93195e-05	SiteClass[|||],TranscriptAnnot[INTERGENIC(MODIFIER|||||||||)]	(TF_binding_site|mE1_TFBS_chinmo|FBsf0000209884),(TF_binding_site|mE1_TFBS_HSA|FBsf0000362802)
3L_19037671_SNP	A	T	T	0.05389	9	158	-0.06855	0.07643	0.0675012	-0.196	2.144e-06	1.81766e-06	-0.1323	0.0005095	0.000627297	0.1274	3.285e-07	2.27618e-07	SiteClass[FBgn0002945|nkd|UTR_5_PRIME|0],TranscriptAnnot[UTR_5_PRIME(MODIFIER||||553|nkd|protein_coding|CODING|FBtr0332649|1);UTR_5_PRIME(MODIFIER||||806|nkd|protein_coding|CODING|FBtr0332650|1);UTR_5_PRIME(MODIFIER||||928|nkd|protein_coding|CODING|FBtr0075039|1)]	(TF_binding_site|BDTNP1_TFBS_bcd|FBsf0000333940),(TF_binding_site|BDTNP1_TFBS_da|FBsf0000327596),(TF_binding_site|BDTNP1_TFBS_dl|FBsf0000308516),(TF_binding_site|BDTNP1_TFBS_hb|FBsf0000291564),(TF_binding_site|BDTNP1_TFBS_Med|FBsf0000283628),(TF_binding_site|BDTNP1_TFBS_prd|FBsf0000275729),(TF_binding_site|BDTNP1_TFBS_slp1|FBsf0000272700),(TF_binding_site|BDTNP1_TFBS_sna|FBsf0000269578),(TF_bindi…
3R_6318598_SNP	T	C	C	0.09375	15	145	-0.1509	6.308e-07	2.32961e-07	-0.1012	0.002922	0.000893743	-0.126	3.643e-05	5.01672e-06	-0.04968	0.01552	0.0133795	SiteClass[|||],TranscriptAnnot[INTERGENIC(MODIFIER|||||||||)]	-
X_12617153_SNP	G	T	T	0.1091	18	147	-0.1153	2.797e-05	2.5878e-05	-0.1493	6.324e-07	2.34201e-07	-0.1323	1.122e-06	3.97041e-07	0.03404	0.07213	0.0667282	SiteClass[FBgn0264678|CR43963|INTRON|0;FBgn0263865|Smr|INTRON|0],TranscriptAnnot[INTRON(MODIFIER||||3601|Smr|protein_coding|CODING|FBtr0333765|2);INTRON(MODIFIER||||3601|Smr|protein_coding|CODING|FBtr0333766|3);INTRON(MODIFIER||||3601|Smr|protein_coding|CODING|FBtr0333767|2);INTRON(MODIFIER||||3607|Smr|protein_coding|CODING|FBtr0333768|3);INTRON(MODIFIER|||||CR43963|ncRNA|NON_CODING|FBtr0333774|1…	-
3R_8990415_SNP	G	A	A	0.1519	24	134	-0.107	1.549e-05	5.81624e-06	-0.1225	8.476e-06	9.1995e-07	-0.1147	3.614e-06	2.44274e-07	0.01554	0.3573	0.347416	SiteClass[FBgn0038118|timeout|DOWNSTREAM|817],TranscriptAnnot[DOWNSTREAM(MODIFIER||||1384|timeout|protein_coding|CODING|FBtr0082712|);INTERGENIC(MODIFIER|||||||||)]	-
2L_6237389_SNP	A	G	G	0.05389	9	158	-0.1542	4.681e-05	1.86078e-05	-0.1908	3.502e-06	3.8491e-07	-0.1725	3.921e-06	2.49725e-07	0.03656	0.1563	0.152136	SiteClass[|||],TranscriptAnnot[INTERGENIC(MODIFIER|||||||||)]	-
3R_7311619_SNP	T	C	C	0.08589	14	149	-0.1345	1.641e-05	6.42332e-06	-0.1564	4.784e-06	7.51343e-07	-0.1454	2.623e-06	2.50067e-07	0.02194	0.3025	0.292708	SiteClass[|||],TranscriptAnnot[INTERGENIC(MODIFIER|||||||||)]	-
X_15222038_SNP	T	A	A	0.06918	11	148	-0.1758	1.894e-07	3.11465e-07	-0.1952	1.073e-07	1.26679e-06	-0.1855	2.239e-08	2.51449e-07	0.01935	0.4192	0.406796	SiteClass[FBgn0004924|Top1|UTR_3_PRIME|0;FBgn0015926|dah|UPSTREAM|341],TranscriptAnnot[UPSTREAM(MODIFIER||||646|dah|protein_coding|CODING|FBtr0330404|);UPSTREAM(MODIFIER||||649|dah|protein_coding|CODING|FBtr0074007|);UTR_3_PRIME(MODIFIER||||974|Top1|protein_coding|CODING|FBtr0074005|8);UTR_3_PRIME(MODIFIER||||974|Top1|protein_coding|CODING|FBtr0100294|9)]	(TF_binding_site|BDTNP1_TFBS_dl|FBsf0000319189)
3R_5651319_SNP	A	T	T	0.06548	11	157	-0.1745	3.229e-07	3.73161e-07	-0.1679	8.731e-06	6.79201e-06	-0.1712	5.037e-07	2.57128e-07	-0.006552	0.7781	0.778569	SiteClass[FBgn0037766|Teh1|DOWNSTREAM|484;FBgn0262105|CR42858|UPSTREAM|733],TranscriptAnnot[DOWNSTREAM(MODIFIER||||279|Teh1|protein_coding|CODING|FBtr0082151|);DOWNSTREAM(MODIFIER||||299|Teh1|protein_coding|CODING|FBtr0330082|);INTERGENIC(MODIFIER|||||||||);UPSTREAM(MODIFIER|||||CR42858|ncRNA|NON_CODING|FBtr0304027|)]	-
3R_9087502_SNP	C	T	T	0.216	35	127	-0.09999	1.792e-06	9.5873e-07	-0.1017	1.262e-05	5.28508e-06	-0.1009	1.547e-06	2.65491e-07	0.001753	0.9013	0.902211	SiteClass[FBgn0040551|CG11686|INTRON|0;FBgn0038128|Ravus|DOWNSTREAM|952],TranscriptAnnot[DOWNSTREAM(MODIFIER||||359|Ravus|protein_coding|CODING|FBtr0082779|);INTRON(MODIFIER||||70|CG11686|protein_coding|CODING|FBtr0082735|2);INTRON(MODIFIER||||70|CG11686|protein_coding|CODING|FBtr0335222|2)]	-
3R_11025977_SNP	G	A	A	0.1656	26	131	-0.1223	3.935e-07	2.69802e-07	-0.1234	2.948e-06	5.67861e-06	-0.1228	2.823e-07	4.67343e-07	0.001108	0.9459	0.944925	SiteClass[FBgn0260659|CG42542|INTRON|0],TranscriptAnnot[INTRON(MODIFIER||||323|CG42542|protein_coding|CODING|FBtr0301101|4);INTRON(MODIFIER||||323|CG42542|protein_coding|CODING|FBtr0301102|4);INTRON(MODIFIER||||323|CG42542|protein_coding|CODING|FBtr0302324|4);INTRON(MODIFIER||||503|CG42542|protein_coding|CODING|FBtr0301103|4);INTRON(MODIFIER||||503|CG42542|protein_coding|CODING|FBtr0301104|4);UPS…	-
X_12758481_SNP	C	A	C	0.3976	66	100	-0.07046	6.719e-05	2.73623e-05	-0.08904	3.873e-06	2.88282e-07	-0.07975	5.153e-06	4.55255e-07	0.01858	0.1216	0.115551	SiteClass[FBgn0259171|Pde9|INTRON|0],TranscriptAnnot[INTRON(MODIFIER||||1526|Pde9|protein_coding|CODING|FBtr0299635|2);INTRON(MODIFIER||||1526|Pde9|protein_coding|CODING|FBtr0333524|1);INTRON(MODIFIER||||1526|Pde9|protein_coding|CODING|FBtr0333525|2);INTRON(MODIFIER||||1623|Pde9|protein_coding|CODING|FBtr0330395|2)]	-
X_11614988_SNP	T	C	T	0.08982	15	152	-0.1384	3.758e-06	2.11301e-06	-0.1506	4.715e-06	2.23126e-06	-0.1445	1.182e-06	2.90859e-07	0.01216	0.5518	0.547276	SiteClass[FBgn0030330|Tango10|SYNONYMOUS_CODING|0],TranscriptAnnot[SYNONYMOUS_CODING(LOW|SILENT|aaT/aaC|N98|587|Tango10|protein_coding|CODING|FBtr0073552|);SYNONYMOUS_CODING(LOW|SILENT|aaT/aaC|N98|587|Tango10|protein_coding|CODING|FBtr0073553|);SYNONYMOUS_CODING(LOW|SILENT|aaT/aaC|N98|587|Tango10|protein_coding|CODING|FBtr0332955|)]	(TF_binding_site|BDTNP1_TFBS_dl|FBsf0000318449),(TF_binding_site|BDTNP1_TFBS_sna|FBsf0000270208),(TF_binding_site|BDTNP1_TFBS_twi|FBsf0000205756),(TF_binding_site|mE1_TFBS_cad|FBsf0000243274),(TF_binding_site|mE1_TFBS_HSA|FBsf0000381602)
3R_9069608_SNP	A	G	G	0.1635	26	133	-0.1169	1.019e-06	2.98399e-07	-0.08678	0.00109	0.000625677	-0.1019	2.151e-05	4.0293e-06	-0.03015	0.06039	0.0585552	SiteClass[FBgn0000024|Ace|SYNONYMOUS_CODING|0],TranscriptAnnot[SYNONYMOUS_CODING(LOW|SILENT|ttC/ttT|F236|636|Ace|protein_coding|CODING|FBtr0335223|);SYNONYMOUS_CODING(LOW|SILENT|ttC/ttT|F236|649|Ace|protein_coding|CODING|FBtr0082780|);SYNONYMOUS_CODING(LOW|SILENT|ttC/ttT|F236|649|Ace|protein_coding|CODING|FBtr0300486|)]	-
2L_14039221_SNP	T	C	C	0.1456	23	135	-0.0934	0.0002359	0.000170068	-0.1333	7.894e-07	3.01106e-07	-0.1133	4.838e-06	1.77964e-06	0.03986	0.01904	0.0170944	SiteClass[FBgn0028875|nAcRalpha-34E|UPSTREAM|949],TranscriptAnnot[INTERGENIC(MODIFIER|||||||||);UPSTREAM(MODIFIER||||482|nAcRalpha-34E|protein_coding|CODING|FBtr0301836|);UPSTREAM(MODIFIER||||808|nAcRalpha-34E|protein_coding|CODING|FBtr0080594|);UPSTREAM(MODIFIER||||808|nAcRalpha-34E|protein_coding|CODING|FBtr0300594|);UPSTREAM(MODIFIER||||808|nAcRalpha-34E|protein_coding|CODING|FBtr0309867|)]	(TF_binding_site|BDTNP1_TFBS_dl|FBsf0000298573),(TF_binding_site|mE1_TFBS_cad|FBsf0000242101)
3L_19018585_SNP	A	C	C	0.05389	9	158	-0.06348	0.1031	0.0880901	-0.1897	5.221e-06	8.0015e-06	-0.1266	0.0009664	0.00140491	0.1262	3.779e-07	3.02601e-07	SiteClass[FBgn0002945|nkd|INTRON|0],TranscriptAnnot[INTRON(MODIFIER||||553|nkd|protein_coding|CODING|FBtr0332649|1);INTRON(MODIFIER||||806|nkd|protein_coding|CODING|FBtr0332650|1);INTRON(MODIFIER||||928|nkd|protein_coding|CODING|FBtr0075039|1)]	-
3R_11643387_SNP	T	A	A	0.1181	17	127	-0.1063	0.0001877	0.00029955	-0.156	3.08e-07	3.2393e-07	-0.1311	2.252e-06	4.36064e-06	0.04969	0.01318	0.00929175	SiteClass[FBgn0026616|alpha-Man-IIb|INTRON|0],TranscriptAnnot[INTRON(MODIFIER||||1249|alpha-Man-IIb|protein_coding|CODING|FBtr0083179|1);INTRON(MODIFIER||||1249|alpha-Man-IIb|protein_coding|CODING|FBtr0334593|1)]	-
3R_9076306_SNP	A	T	T	0.2179	34	122	-0.1114	1.515e-07	3.44078e-07	-0.1239	1.375e-07	1.16993e-06	-0.1177	2.593e-08	3.30083e-07	0.01249	0.3989	0.388119	SiteClass[FBgn0000024|Ace|INTRON|0],TranscriptAnnot[INTRON(MODIFIER||||636|Ace|protein_coding|CODING|FBtr0335223|1);INTRON(MODIFIER||||649|Ace|protein_coding|CODING|FBtr0082780|1);INTRON(MODIFIER||||649|Ace|protein_coding|CODING|FBtr0300486|2)]	-
3R_10005528_SNP	C	G	G	0.06918	11	148	-0.1756	4.949e-07	3.35053e-07	-0.1789	2.336e-06	3.48047e-06	-0.1773	2.767e-07	3.58822e-07	0.00327	0.8891	0.888626	SiteClass[FBgn0011582|DopR|INTRON|0],TranscriptAnnot[INTRON(MODIFIER||||481|DopR|protein_coding|CODING|FBtr0301351|5);INTRON(MODIFIER||||496|DopR|protein_coding|CODING|FBtr0290283|5);INTRON(MODIFIER||||511|DopR|protein_coding|CODING|FBtr0308191|5);INTRON(MODIFIER||||560|DopR|protein_coding|CODING|FBtr0330711|5)]	-
2R_8675762_SNP	A	G	G	0.1688	27	133	-0.01238	0.6052	0.677702	-0.08975	0.0005437	0.000599351	-0.05107	0.03135	0.0414053	0.07737	7.177e-07	3.4824e-07	SiteClass[FBgn0003326|sca|INTRON|0],TranscriptAnnot[INTRON(MODIFIER||||799|sca|protein_coding|CODING|FBtr0087855|2);INTRON(MODIFIER||||799|sca|protein_coding|CODING|FBtr0087856|2)]	-
3R_9076302_SNP	T	A	A	0.2194	34	121	-0.1113	1.768e-07	3.67949e-07	-0.1237	1.624e-07	1.25401e-06	-0.1175	3.098e-08	3.53907e-07	0.0124	0.4042	0.391938	SiteClass[FBgn0000024|Ace|INTRON|0],TranscriptAnnot[INTRON(MODIFIER||||636|Ace|protein_coding|CODING|FBtr0335223|1);INTRON(MODIFIER||||649|Ace|protein_coding|CODING|FBtr0082780|1);INTRON(MODIFIER||||649|Ace|protein_coding|CODING|FBtr0300486|2)]	-
3R_9087655_SNP	T	C	C	0.1013	16	142	-0.1082	0.0002521	0.000145498	-0.1469	5.65e-06	3.56407e-07	-0.1275	1.403e-05	1.16172e-06	0.03875	0.05051	0.0479049	SiteClass[FBgn0040551|CG11686|INTRON|0;FBgn0038128|Ravus|DOWNSTREAM|799],TranscriptAnnot[DOWNSTREAM(MODIFIER||||359|Ravus|protein_coding|CODING|FBtr0082779|);INTRON(MODIFIER||||70|CG11686|protein_coding|CODING|FBtr0082735|2);INTRON(MODIFIER||||70|CG11686|protein_coding|CODING|FBtr0335222|2)]	-
2R_11608431_SNP	C	G	G	0.07143	12	156	-0.0368	0.2794	0.376183	-0.1464	6.234e-05	0.000252749	-0.09161	0.006407	0.0182701	0.1096	4.799e-07	3.67718e-07	SiteClass[|||],TranscriptAnnot[INTERGENIC(MODIFIER|||||||||)]	-
2R_12630129_SNP	C	G	G	0.06667	11	154	-0.1663	6.08e-07	3.7568e-07	-0.1369	0.0003178	4.1448e-05	-0.1516	7.115e-06	5.74691e-07	-0.02937	0.2126	0.206787	SiteClass[|||],TranscriptAnnot[INTERGENIC(MODIFIER|||||||||)]	-
3R_9076295_DEL	C	CGATC	CGATC	0.2194	34	121	-0.111	1.845e-07	3.97632e-07	-0.1234	1.682e-07	1.35301e-06	-0.1172	3.223e-08	3.84982e-07	0.01241	0.404	0.391739	SiteClass[FBgn0000024|Ace|INTRON|0],TranscriptAnnot[INTRON(MODIFIER||||636|Ace|protein_coding|CODING|FBtr0335223|1);INTRON(MODIFIER||||649|Ace|protein_coding|CODING|FBtr0082780|1);INTRON(MODIFIER||||649|Ace|protein_coding|CODING|FBtr0300486|2)]	-
3L_15115418_SNP	T	C	C	0.06024	10	156	-0.1805	2.866e-07	3.88784e-07	-0.135	0.0008228	0.00104224	-0.1578	1.177e-05	1.64632e-05	-0.04549	0.05198	0.0606439	SiteClass[FBgn0036480|Cep135|INTRON|0;FBgn0036481|CG16959|INTRON|0;FBgn0052847|CG32847|DOWNSTREAM|17],TranscriptAnnot[DOWNSTREAM(MODIFIER||||164|CG32847|protein_coding|CODING|FBtr0075639|);INTRON(MODIFIER||||1059|Cep135|protein_coding|CODING|FBtr0075638|7);INTRON(MODIFIER||||1065|Cep135|protein_coding|CODING|FBtr0303375|7);INTRON(MODIFIER||||489|CG16959|protein_coding|CODING|FBtr0303378|3);INTRON…	(TF_binding_site|BDTNP1_TFBS_twi|FBsf0000203873)
3R_6393729_SNP	C	G	G	0.08537	14	150	-0.1484	1.279e-06	3.93899e-07	-0.1056	0.002042	0.00026962	-0.127	4.231e-05	2.27014e-06	-0.04283	0.02692	0.038995	SiteClass[FBgn0001235|hth|INTRON|0],TranscriptAnnot[INTRON(MODIFIER||||458|hth|protein_coding|CODING|FBtr0301956|5);INTRON(MODIFIER||||472|hth|protein_coding|CODING|FBtr0082256|6);INTRON(MODIFIER||||487|hth|protein_coding|CODING|FBtr0082255|6)]	(TF_binding_site|mE1_TFBS_cnc|FBsf0000206621)
X_15209738_SNP	G	T	T	0.07186	12	155	-0.1674	3.411e-07	8.92835e-07	-0.1888	1.483e-07	9.66678e-07	-0.1781	4.255e-08	4.45039e-07	0.02138	0.3443	0.338926	SiteClass[FBgn0261703|gce|INTRON|0],TranscriptAnnot[INTRON(MODIFIER||||918|gce|protein_coding|CODING|FBtr0310309|5);INTRON(MODIFIER||||959|gce|protein_coding|CODING|FBtr0303198|5);INTRON(MODIFIER||||959|gce|protein_coding|CODING|FBtr0303199|5);INTRON(MODIFIER||||959|gce|protein_coding|CODING|FBtr0310308|5);INTRON(MODIFIER||||959|gce|protein_coding|CODING|FBtr0331765|4);INTRON(MODIFIER||||959|gce|…	-
3R_9087669_SNP	C	A	A	0.331	47	95	-0.09365	5.6e-06	1.29842e-06	-0.09825	1.528e-05	4.537e-06	-0.09595	2.969e-06	4.48323e-07	0.004596	0.7428	0.730129	SiteClass[FBgn0040551|CG11686|INTRON|0;FBgn0038128|Ravus|DOWNSTREAM|785],TranscriptAnnot[DOWNSTREAM(MODIFIER||||359|Ravus|protein_coding|CODING|FBtr0082779|);INTRON(MODIFIER||||70|CG11686|protein_coding|CODING|FBtr0082735|2);INTRON(MODIFIER||||70|CG11686|protein_coding|CODING|FBtr0335222|2)]	-
3R_7350497_SNP	A	G	G	0.05917	10	159	-0.1257	0.0005425	0.000283691	-0.1862	2.234e-06	4.54606e-07	-0.156	1.382e-05	1.70635e-06	0.06046	0.0129	0.012241	SiteClass[|||],TranscriptAnnot[INTERGENIC(MODIFIER|||||||||)]	-
X_15223088_SNP	T	C	C	0.07692	13	156	-0.1574	6.21e-07	1.27651e-06	-0.1808	1.728e-07	8.32809e-07	-0.1691	6.507e-08	4.56059e-07	0.0234	0.2807	0.277156	SiteClass[FBgn0015926|dah|SYNONYMOUS_CODING|0],TranscriptAnnot[SYNONYMOUS_CODING(LOW|SILENT|ttC/ttT|F161|646|dah|protein_coding|CODING|FBtr0330404|);SYNONYMOUS_CODING(LOW|SILENT|ttC/ttT|F164|649|dah|protein_coding|CODING|FBtr0074007|)]	(TF_binding_site|mE1_TFBS_chinmo|FBsf0000208951),(TF_binding_site|mE1_TFBS_HSA|FBsf0000348093),(TF_binding_site|mE1_TFBS_sens|FBsf0000220964)
3R_9031423_SNP	T	G	G	0.2829	43	109	-0.08994	1.004e-05	4.56841e-06	-0.1003	7.438e-06	2.52985e-06	-0.09512	2.723e-06	4.84089e-07	0.01037	0.4475	0.440375	SiteClass[|||],TranscriptAnnot[INTERGENIC(MODIFIER|||||||||)]	-
3R_8117848_DEL	T	TGGAATTCCGAATCCACCGGT	TGGAATTCCGAATCCACCGGT	0.1037	17	147	-0.1171	3.145e-05	1.06011e-05	-0.1307	1.788e-05	1.80126e-06	-0.1239	7.863e-06	4.91159e-07	0.01352	0.4786	0.479617	SiteClass[FBgn0003651|svp|INTRON|0],TranscriptAnnot[INTRON(MODIFIER||||281|svp|protein_coding|CODING|FBtr0082562|2);INTRON(MODIFIER||||543|svp|protein_coding|CODING|FBtr0082564|2);INTRON(MODIFIER||||554|svp|protein_coding|CODING|FBtr0331183|2);INTRON(MODIFIER||||746|svp|protein_coding|CODING|FBtr0082563|2)]	-
3R_13346742_SNP	A	T	T	0.05556	9	153	-0.187	5.291e-07	4.92808e-07	-0.1579	0.000181	0.000161748	-0.1724	4.851e-06	3.97242e-06	-0.02911	0.2515	0.25515	SiteClass[|||],TranscriptAnnot[INTERGENIC(MODIFIER|||||||||)]	-
3R_6346660_SNP	A	T	T	0.2333	35	115	-0.1036	2.96e-06	4.96663e-07	-0.0813	0.0008516	0.000310401	-0.09245	2.855e-05	3.23063e-06	-0.0223	0.1317	0.120781	SiteClass[FBgn0001235|hth|INTRON|0],TranscriptAnnot[INTRON(MODIFIER||||218|hth|protein_coding|CODING|FBtr0301345|5);INTRON(MODIFIER||||458|hth|protein_coding|CODING|FBtr0301956|10);INTRON(MODIFIER||||472|hth|protein_coding|CODING|FBtr0082256|11);INTRON(MODIFIER||||487|hth|protein_coding|CODING|FBtr0082255|11)]	-
3R_13346741_SNP	T	G	G	0.05521	9	154	-0.1868	5.033e-07	5.01522e-07	-0.157	0.0001976	0.000173016	-0.1719	5.02e-06	4.17661e-06	-0.02977	0.2421	0.2443	SiteClass[|||],TranscriptAnnot[INTERGENIC(MODIFIER|||||||||)]	-
3R_9069054_SNP	T	A	A	0.2829	43	109	0.09463	4.535e-06	1.2414e-06	0.1043	3.666e-06	3.81492e-06	0.09946	1.11e-06	5.03872e-07	-0.00965	0.4937	0.472942	SiteClass[FBgn0000024|Ace|NON_SYNONYMOUS_CODING|0],TranscriptAnnot[NON_SYNONYMOUS_CODING(MODERATE|MISSENSE|tTt/tAt|F368Y|636|Ace|protein_coding|CODING|FBtr0335223|);NON_SYNONYMOUS_CODING(MODERATE|MISSENSE|tTt/tAt|F368Y|649|Ace|protein_coding|CODING|FBtr0082780|);NON_SYNONYMOUS_CODING(MODERATE|MISSENSE|tTt/tAt|F368Y|649|Ace|protein_coding|CODING|FBtr0300486|)]	-
2L_1197775_SNP	C	T	T	0.1765	27	126	-0.1136	1.332e-06	5.98127e-07	-0.1104	1.772e-05	5.70273e-06	-0.112	1.461e-06	5.10857e-07	-0.003156	0.8461	0.842146	SiteClass[FBgn0031323|CG5139|DOWNSTREAM|690;FBgn0031322|CG5001|DOWNSTREAM|968],TranscriptAnnot[DOWNSTREAM(MODIFIER||||179|CG5139|protein_coding|CODING|FBtr0077977|);DOWNSTREAM(MODIFIER||||346|CG5001|protein_coding|CODING|FBtr0307057|);DOWNSTREAM(MODIFIER||||350|CG5001|protein_coding|CODING|FBtr0077972|);DOWNSTREAM(MODIFIER||||350|CG5001|protein_coding|CODING|FBtr0307056|);DOWNSTREAM(MODIFIER||||3…	-
3R_13354019_SNP	A	G	G	0.05521	9	154	-0.1865	5.555e-07	5.33333e-07	-0.1574	0.0001757	0.000170987	-0.172	4.902e-06	4.29984e-06	-0.02908	0.247	0.255545	SiteClass[|||],TranscriptAnnot[INTERGENIC(MODIFIER|||||||||)]	-
3R_6407950_DEL	T	TT	TT	0.08696	12	126	-0.161	6.958e-07	5.48294e-07	-0.1001	0.006118	0.00193167	-0.1306	7.488e-05	1.37671e-05	-0.06088	0.003218	0.00639601	SiteClass[FBgn0001235|hth|DOWNSTREAM|249],TranscriptAnnot[DOWNSTREAM(MODIFIER||||266|hth|protein_coding|CODING|FBtr0100454|);INTRON(MODIFIER||||458|hth|protein_coding|CODING|FBtr0301956|5);INTRON(MODIFIER||||472|hth|protein_coding|CODING|FBtr0082256|6);INTRON(MODIFIER||||487|hth|protein_coding|CODING|FBtr0082255|6)]	-
3L_6864587_SNP	A	G	A	0.1928	32	134	-0.06072	0.006235	0.00577404	-0.1207	3.351e-07	5.58856e-07	-0.09073	3.068e-05	4.04528e-05	0.06002	3.589e-05	2.80196e-05	SiteClass[|||],TranscriptAnnot[INTERGENIC(MODIFIER|||||||||)]	(TF_binding_site|mE1_TFBS_chinmo|FBsf0000209884),(TF_binding_site|mE1_TFBS_HSA|FBsf0000362802)
3L_6864606_SNP	T	C	T	0.1928	32	134	-0.06072	0.006235	0.00577404	-0.1207	3.351e-07	5.58856e-07	-0.09073	3.068e-05	4.04528e-05	0.06002	3.589e-05	2.80196e-05	SiteClass[|||],TranscriptAnnot[INTERGENIC(MODIFIER|||||||||)]	(TF_binding_site|mE1_TFBS_chinmo|FBsf0000209884),(TF_binding_site|mE1_TFBS_HSA|FBsf0000362802)
3L_6864607_SNP	T	C	T	0.1928	32	134	-0.06072	0.006235	0.00577404	-0.1207	3.351e-07	5.58856e-07	-0.09073	3.068e-05	4.04528e-05	0.06002	3.589e-05	2.80196e-05	SiteClass[|||],TranscriptAnnot[INTERGENIC(MODIFIER|||||||||)]	(TF_binding_site|mE1_TFBS_chinmo|FBsf0000209884),(TF_binding_site|mE1_TFBS_HSA|FBsf0000362802)
3L_6864651_SNP	A	T	A	0.1928	32	134	-0.06072	0.006235	0.00577404	-0.1207	3.351e-07	5.58856e-07	-0.09073	3.068e-05	4.04528e-05	0.06002	3.589e-05	2.80196e-05	SiteClass[|||],TranscriptAnnot[INTERGENIC(MODIFIER|||||||||)]	(TF_binding_site|mE1_TFBS_chinmo|FBsf0000209884),(TF_binding_site|mE1_TFBS_HSA|FBsf0000362802)
3R_13277108_SNP	C	G	G	0.06918	11	148	-0.1671	2.393e-07	5.87001e-07	-0.1496	6.94e-05	5.99887e-05	-0.1584	1.723e-06	2.11131e-06	-0.01754	0.4491	0.452203	SiteClass[|||],TranscriptAnnot[INTERGENIC(MODIFIER|||||||||)]	-
3L_18168486_SNP	A	T	T	0.15	24	136	-0.1142	4.443e-06	3.54379e-06	-0.1431	1.083e-07	6.22098e-07	-0.1286	1.529e-07	5.98291e-07	0.02899	0.08671	0.0783752	SiteClass[FBgn0003997|W|INTRON|0],TranscriptAnnot[INTRON(MODIFIER||||410|W|protein_coding|CODING|FBtr0075133|1);INTRON(MODIFIER||||410|W|protein_coding|CODING|FBtr0332862|1)]	(TF_binding_site|BDTNP1_TFBS_da|FBsf0000327482),(TF_binding_site|BDTNP1_TFBS_dl|FBsf0000308334),(TF_binding_site|BDTNP1_TFBS_ftz|FBsf0000295350),(TF_binding_site|BDTNP1_TFBS_hb|FBsf0000291534),(TF_binding_site|BDTNP1_TFBS_Med|FBsf0000283536),(TF_binding_site|BDTNP1_TFBS_prd|FBsf0000275705),(TF_binding_site|BDTNP1_TFBS_twi|FBsf0000204165),(TF_binding_site|mE1_TFBS_cad|FBsf0000245293),(TF_binding_s…
2R_8068499_SNP	G	A	G	0.06918	11	148	-0.1679	5.663e-07	6.15706e-07	-0.1326	0.000409	0.00136313	-0.1502	7.401e-06	4.06299e-05	-0.03527	0.1407	0.129631	SiteClass[FBgn0033692|wash|SYNONYMOUS_CODING|0],TranscriptAnnot[SYNONYMOUS_CODING(LOW|SILENT|ccG/ccA|P98|499|wash|protein_coding|CODING|FBtr0087989|);SYNONYMOUS_CODING(LOW|SILENT|ccG/ccA|P98|499|wash|protein_coding|CODING|FBtr0339595|)]	(TF_binding_site|BDTNP1_TFBS_dl|FBsf0000301586),(TF_binding_site|BDTNP1_TFBS_Med|FBsf0000280036),(TF_binding_site|mE1_TFBS_cad|FBsf0000246426),(TF_binding_site|mE1_TFBS_chinmo|FBsf0000211131),(TF_binding_site|mE1_TFBS_HSA|FBsf0000355896),(TF_binding_site|mE1_TFBS_HSA|FBsf0000355897)
3R_5587726_SNP	A	G	G	0.06061	10	155	-0.1879	1.263e-07	6.27138e-07	-0.1898	1.492e-06	2.57256e-05	-0.1888	9.809e-08	3.05066e-06	0.001921	0.9384	0.937191	SiteClass[FBgn0028401|Snap24|UTR_3_PRIME|0;FBgn0037744|CG8417|DOWNSTREAM|796],TranscriptAnnot[DOWNSTREAM(MODIFIER||||396|CG8417|protein_coding|CODING|FBtr0082131|);UTR_3_PRIME(MODIFIER||||212|Snap24|protein_coding|CODING|FBtr0082163|1)]	-
3L_6864619_SNP	A	T	A	0.1951	32	132	-0.06061	0.006733	0.00588403	-0.1202	4.481e-07	6.42126e-07	-0.09042	3.714e-05	4.34137e-05	0.05962	4.518e-05	3.27197e-05	SiteClass[|||],TranscriptAnnot[INTERGENIC(MODIFIER|||||||||)]	(TF_binding_site|mE1_TFBS_chinmo|FBsf0000209884),(TF_binding_site|mE1_TFBS_HSA|FBsf0000362802)
2R_19476075_SNP	A	C	C	0.1259	18	125	-0.1397	1.161e-06	6.60499e-07	-0.1212	0.0001389	0.000210503	-0.1304	5.992e-06	8.22217e-06	-0.01852	0.3238	0.324741	SiteClass[FBgn0015903|apt|INTRON|0],TranscriptAnnot[INTRON(MODIFIER||||469|apt|protein_coding|CODING|FBtr0072068|2);INTRON(MODIFIER||||483|apt|protein_coding|CODING|FBtr0072067|2);INTRON(MODIFIER||||483|apt|protein_coding|CODING|FBtr0072069|1);INTRON(MODIFIER||||483|apt|protein_coding|CODING|FBtr0072070|1);INTRON(MODIFIER||||489|apt|protein_coding|CODING|FBtr0072066|1)]	-
3L_15034879_SNP	A	G	A	0.05488	9	155	-0.1862	4.044e-07	6.7013e-07	-0.1369	0.001116	0.00141215	-0.1615	1.53e-05	2.53369e-05	-0.0493	0.05263	0.0529895	SiteClass[FBgn0036465|Rpn12R|SYNONYMOUS_CODING|0;FBgn0261090|Sytbeta|INTRON|0],TranscriptAnnot[INTRON(MODIFIER||||546|Sytbeta|protein_coding|CODING|FBtr0299848|2);SYNONYMOUS_CODING(LOW|SILENT|gtT/gtC|V242|262|Rpn12R|protein_coding|CODING|FBtr0075669|)]	(TF_binding_site|BDTNP1_TFBS_dl|FBsf0000307601),(TF_binding_site|mE1_TFBS_HSA|FBsf0000365377)
3R_24736602_SNP	C	G	G	0.06173	10	152	-0.1712	2.553e-06	6.72758e-07	-0.1042	0.0106	0.00770883	-0.1377	0.0001726	9.27209e-05	-0.06703	0.006136	0.00544638	SiteClass[FBgn0259220|Doa|INTRON|0],TranscriptAnnot[INTRON(MODIFIER||||398|Doa|protein_coding|CODING|FBtr0336461|1);INTRON(MODIFIER||||511|Doa|protein_coding|CODING|FBtr0299748|4);INTRON(MODIFIER||||511|Doa|protein_coding|CODING|FBtr0299752|4);INTRON(MODIFIER||||580|Doa|protein_coding|CODING|FBtr0299742|4);INTRON(MODIFIER||||580|Doa|protein_coding|CODING|FBtr0299745|4);INTRON(MODIFIER||||580|Doa|…	(TF_binding_site|mE1_TFBS_cad|FBsf0000249467),(TF_binding_site|mE1_TFBS_chinmo|FBsf0000213627)
3R_8990351_SNP	G	A	A	0.172	27	130	-0.1005	2.941e-05	8.62058e-06	-0.1113	1.968e-05	3.50252e-06	-0.1059	8.493e-06	6.81495e-07	0.01082	0.4971	0.493335	SiteClass[FBgn0038118|timeout|DOWNSTREAM|753],TranscriptAnnot[DOWNSTREAM(MODIFIER||||1384|timeout|protein_coding|CODING|FBtr0082712|);INTERGENIC(MODIFIER|||||||||)]	-
2L_14593691_SNP	T	A	A	0.07407	12	150	0.01096	0.7466	0.538392	-0.09641	0.008776	0.0242243	-0.04272	0.2052	0.380959	0.1074	5.592e-07	6.8308e-07	SiteClass[|||],TranscriptAnnot[INTERGENIC(MODIFIER|||||||||)]	(TF_binding_site|BDTNP1_TFBS_twi|FBsf0000201747)
3R_9078765_SNP	T	C	C	0.3092	47	105	-0.09682	8.846e-07	1.1161e-06	-0.09786	6.52e-06	6.06856e-06	-0.09734	7.037e-07	7.08335e-07	0.001042	0.9376	0.936635	SiteClass[FBgn0000024|Ace|INTRON|0],TranscriptAnnot[INTRON(MODIFIER||||636|Ace|protein_coding|CODING|FBtr0335223|1);INTRON(MODIFIER||||649|Ace|protein_coding|CODING|FBtr0082780|1);INTRON(MODIFIER||||649|Ace|protein_coding|CODING|FBtr0300486|2)]	-
X_7802493_SNP	T	C	C	0.09202	15	148	-0.1286	1.986e-05	1.72336e-05	-0.1504	4.502e-06	1.11329e-06	-0.1395	2.744e-06	7.16227e-07	0.02182	0.2908	0.280333	SiteClass[FBgn0029974|dpr14|UPSTREAM|174;FBgn0029975|CG1444|UPSTREAM|418],TranscriptAnnot[INTERGENIC(MODIFIER|||||||||);UPSTREAM(MODIFIER||||321|CG1444|protein_coding|CODING|FBtr0071091|);UPSTREAM(MODIFIER||||340|dpr14|protein_coding|CODING|FBtr0071134|);UPSTREAM(MODIFIER||||340|dpr14|protein_coding|CODING|FBtr0307270|)]	(TF_binding_site|BDTNP1_TFBS_dl|FBsf0000317479),(TF_binding_site|mE1_TFBS_h|FBsf0000257853),(TF_binding_site|mE1_TFBS_HSA|FBsf0000380389),(TF_binding_site|mE1_TFBS_Trl|FBsf0000342615)
3L_16752714_SNP	T	A	A	0.05	8	152	-0.2007	4.678e-07	7.25428e-07	-0.179	2.611e-05	0.000132408	-0.1898	1.176e-06	6.58526e-06	-0.02173	0.4084	0.422203	SiteClass[|||],TranscriptAnnot[INTERGENIC(MODIFIER|||||||||)]	-
2R_8061873_SNP	G	T	T	0.06707	11	153	-0.1665	9.358e-07	7.58934e-07	-0.13	0.0006332	0.00172978	-0.1483	1.332e-05	5.20329e-05	-0.03646	0.1249	0.116669	SiteClass[FBgn0014184|Oda|UPSTREAM|104;FBgn0010621|Cct5|UPSTREAM|434],TranscriptAnnot[INTERGENIC(MODIFIER|||||||||);UPSTREAM(MODIFIER||||254|Oda|protein_coding|CODING|FBtr0088013|);UPSTREAM(MODIFIER||||512|Cct5|protein_coding|CODING|FBtr0087988|);UPSTREAM(MODIFIER||||542|Cct5|protein_coding|CODING|FBtr0087987|)]	(TF_binding_site|BDTNP1_TFBS_dl|FBsf0000301581),(TF_binding_site|BDTNP1_TFBS_Med|FBsf0000280033),(TF_binding_site|BDTNP1_TFBS_slp1|FBsf0000272123),(TF_binding_site|BDTNP1_TFBS_twi|FBsf0000199146),(TF_binding_site|mE1_TFBS_D|FBsf0000240555),(TF_binding_site|mE1_TFBS_disco|FBsf0000259690),(TF_binding_site|mE1_TFBS_GATAe|FBsf0000258380),(TF_binding_site|mE1_TFBS_h|FBsf0000256692),(TF_binding_site|mE…
X_15212796_SNP	A	G	G	0.06587	11	156	-0.1719	4.836e-07	1.1553e-06	-0.1983	8.235e-08	2.01837e-06	-0.1851	3.695e-08	7.59208e-07	0.02642	0.2577	0.256059	SiteClass[FBgn0261703|gce|UTR_3_PRIME|0;FBgn0004924|Top1|UPSTREAM|729],TranscriptAnnot[UPSTREAM(MODIFIER||||974|Top1|protein_coding|CODING|FBtr0074005|);UPSTREAM(MODIFIER||||974|Top1|protein_coding|CODING|FBtr0100294|);UTR_3_PRIME(MODIFIER||||918|gce|protein_coding|CODING|FBtr0310309|10);UTR_3_PRIME(MODIFIER||||959|gce|protein_coding|CODING|FBtr0303198|10);UTR_3_PRIME(MODIFIER||||959|gce|protein_…	(TF_binding_site|BDTNP1_TFBS_dl|FBsf0000319183)
3L_2696499_SNP	T	A	A	0.07273	12	153	-0.0242	0.4811	0.601747	-0.131	0.0004156	0.000587758	-0.0776	0.02254	0.0408886	0.1068	1.239e-06	7.76785e-07	SiteClass[FBgn0264606|CG43955|INTRON|0],TranscriptAnnot[INTRON(MODIFIER||||1314|CG43955|protein_coding|CODING|FBtr0333632|2);INTRON(MODIFIER||||643|CG43955|protein_coding|CODING|FBtr0333630|2);INTRON(MODIFIER||||643|CG43955|protein_coding|CODING|FBtr0333631|2);INTRON(MODIFIER||||969|CG43955|protein_coding|CODING|FBtr0333629|2)]	-
2R_8062180_SNP	C	T	C	0.06832	11	150	-0.1663	1.033e-06	7.85775e-07	-0.1301	0.0006336	0.00168419	-0.1482	1.364e-05	5.13692e-05	-0.03614	0.1315	0.120197	SiteClass[FBgn0010621|Cct5|UPSTREAM|127;FBgn0014184|Oda|UPSTREAM|411],TranscriptAnnot[INTERGENIC(MODIFIER|||||||||);UPSTREAM(MODIFIER||||254|Oda|protein_coding|CODING|FBtr0088013|);UPSTREAM(MODIFIER||||512|Cct5|protein_coding|CODING|FBtr0087988|);UPSTREAM(MODIFIER||||542|Cct5|protein_coding|CODING|FBtr0087987|)]	(TF_binding_site|BDTNP1_TFBS_dl|FBsf0000301581),(TF_binding_site|BDTNP1_TFBS_Med|FBsf0000280033),(TF_binding_site|BDTNP1_TFBS_twi|FBsf0000199146),(TF_binding_site|mE1_TFBS_HSA|FBsf0000355891),(TF_binding_site|mE1_TFBS_HSA|FBsf0000355892),(TF_binding_site|mE1_TFBS_Ubx|FBsf0000263036)
2R_8063730_SNP	C	T	C	0.0679	11	151	-0.1664	1.007e-06	7.99195e-07	-0.1305	0.000579	0.00174276	-0.1484	1.275e-05	5.39838e-05	-0.03594	0.1301	0.122213	SiteClass[FBgn0010621|Cct5|SYNONYMOUS_CODING|0],TranscriptAnnot[SYNONYMOUS_CODING(LOW|SILENT|gaC/gaT|D169|512|Cct5|protein_coding|CODING|FBtr0087988|);SYNONYMOUS_CODING(LOW|SILENT|gaC/gaT|D199|542|Cct5|protein_coding|CODING|FBtr0087987|)]	(TF_binding_site|mE1_TFBS_cad|FBsf0000246425),(TF_binding_site|mE1_TFBS_chinmo|FBsf0000211130),(TF_binding_site|mE1_TFBS_sens|FBsf0000227528)
2R_8100579_SNP	A	G	A	0.09259	15	147	-0.1255	3.413e-05	6.09739e-06	-0.1223	0.0002119	1.12049e-05	-0.1239	4.023e-05	8.25945e-07	-0.003157	0.87	0.876115	SiteClass[FBgn0020377|Sr-CII|UPSTREAM|919;FBgn0033701|CG13171|UPSTREAM|930],TranscriptAnnot[INTERGENIC(MODIFIER|||||||||);UPSTREAM(MODIFIER||||106|CG13171|protein_coding|CODING|FBtr0087995|);UPSTREAM(MODIFIER||||599|Sr-CII|protein_coding|CODING|FBtr0303037|)]	(TF_binding_site|BDTNP1_TFBS_da|FBsf0000323960)
2L_14218387_SNP	A	G	G	0.09091	15	150	-0.01973	0.5165	0.548161	-0.116	0.0004486	0.00100638	-0.06784	0.02446	0.0424003	0.09623	1.309e-06	8.30822e-07	SiteClass[FBgn0016930|smi35A|INTRON|0],TranscriptAnnot[INTRON(MODIFIER||||722|smi35A|protein_coding|CODING|FBtr0089288|2);INTRON(MODIFIER||||722|smi35A|protein_coding|CODING|FBtr0089289|3);INTRON(MODIFIER||||722|smi35A|protein_coding|CODING|FBtr0089290|3);INTRON(MODIFIER||||722|smi35A|protein_coding|CODING|FBtr0100447|3);INTRON(MODIFIER||||722|smi35A|protein_coding|CODING|FBtr0100448|3);INTRON(MO…	-
X_15224004_SNP	C	T	T	0.08284	14	155	-0.1498	9.478e-07	1.75424e-06	-0.1692	4.527e-07	1.93054e-06	-0.1595	1.429e-07	8.37784e-07	0.01936	0.3561	0.352517	SiteClass[FBgn0015926|dah|SYNONYMOUS_CODING|0;FBgn0030628|CG9114|DOWNSTREAM|813],TranscriptAnnot[DOWNSTREAM(MODIFIER||||619|CG9114|protein_coding|CODING|FBtr0074020|);SYNONYMOUS_CODING(LOW|SILENT|tcT/tcC|S445|646|dah|protein_coding|CODING|FBtr0330404|);SYNONYMOUS_CODING(LOW|SILENT|tcT/tcC|S448|649|dah|protein_coding|CODING|FBtr0074007|)]	(TF_binding_site|mE1_TFBS_chinmo|FBsf0000208951)
X_15224088_SNP	G	T	T	0.08284	14	155	-0.1498	9.478e-07	1.75424e-06	-0.1692	4.527e-07	1.93054e-06	-0.1595	1.429e-07	8.37784e-07	0.01936	0.3561	0.352517	SiteClass[FBgn0015926|dah|INTRON|0;FBgn0030628|CG9114|DOWNSTREAM|729],TranscriptAnnot[DOWNSTREAM(MODIFIER||||619|CG9114|protein_coding|CODING|FBtr0074020|);INTRON(MODIFIER||||646|dah|protein_coding|CODING|FBtr0330404|4);INTRON(MODIFIER||||649|dah|protein_coding|CODING|FBtr0074007|4)]	(TF_binding_site|mE1_TFBS_chinmo|FBsf0000208951)
2R_8060092_SNP	G	A	A	0.06667	11	154	-0.1668	8.436e-07	8.39041e-07	-0.1285	0.0007112	0.00204039	-0.1476	1.383e-05	6.26529e-05	-0.03829	0.1057	0.0992029	SiteClass[FBgn0014184|Oda|INTRON|0],TranscriptAnnot[INTRON(MODIFIER||||254|Oda|protein_coding|CODING|FBtr0088013|1)]	(TF_binding_site|BDTNP1_TFBS_da|FBsf0000323954),(TF_binding_site|BDTNP1_TFBS_dl|FBsf0000301579),(TF_binding_site|BDTNP1_TFBS_hb|FBsf0000290101),(TF_binding_site|BDTNP1_TFBS_Med|FBsf0000280031),(TF_binding_site|BDTNP1_TFBS_slp1|FBsf0000272121),(TF_binding_site|BDTNP1_TFBS_twi|FBsf0000199144),(TF_binding_site|BDTNP1_TFBS_z|FBsf0000196515),(TF_binding_site|mE1_TFBS_cad|FBsf0000246424),(TF_binding_si…
X_10070001_SNP	T	G	G	0.2051	32	124	-0.06397	0.005049	0.00491392	-0.1164	1.59e-06	8.42139e-07	-0.0902	5.295e-05	2.99159e-05	0.05245	0.0004946	0.000307769	SiteClass[FBgn0264503|CG43902|INTRON|0],TranscriptAnnot[INTRON(MODIFIER||||1220|CG43902|protein_coding|CODING|FBtr0332934|1)]	-
2L_8053303_SNP	A	G	G	0.05161	8	147	-0.008177	0.8412	0.899383	-0.1371	0.002098	0.00304973	-0.07264	0.07432	0.103631	0.1289	7.231e-07	8.45655e-07	SiteClass[FBgn0031981|CG7466|UTR_3_PRIME|0],TranscriptAnnot[UTR_3_PRIME(MODIFIER||||2898|CG7466|protein_coding|CODING|FBtr0079541|6)]	-
3L_18012945_SNP	C	T	T	0.1384	22	137	-0.1022	8.69e-05	3.5095e-05	-0.1303	4.043e-06	8.59955e-07	-0.1163	6.11e-06	8.90322e-07	0.02808	0.1117	0.100427	SiteClass[FBgn0000568|Eip75B|INTRON|0],TranscriptAnnot[INTRON(MODIFIER||||1412|Eip75B|protein_coding|CODING|FBtr0075148|1);INTRON(MODIFIER||||1412|Eip75B|protein_coding|CODING|FBtr0306813|3);INTRON(MODIFIER||||1412|Eip75B|protein_coding|CODING|FBtr0306814|3)]	(TF_binding_site|BDTNP1_TFBS_dl|FBsf0000308305),(TF_binding_site|mE1_TFBS_HSA|FBsf0000366409),(TF_binding_site|mE1_TFBS_zfh1|FBsf0000334855)
3R_6044043_SNP	C	T	T	0.1304	21	140	-0.1224	2.955e-06	8.78088e-07	-0.1149	7.127e-05	2.42101e-05	-0.1187	5.612e-06	1.0409e-06	-0.007579	0.6685	0.664575	SiteClass[FBgn0004575|Syn|SYNONYMOUS_CODING|0],TranscriptAnnot[SYNONYMOUS_CODING(LOW|SILENT|aaT/aaC|N737|981|Syn|protein_coding|CODING|FBtr0089475|);SYNONYMOUS_CODING(LOW|SILENT|aaT/aaC|N797|1041|Syn|protein_coding|CODING|FBtr0100471|);UTR_3_PRIME(MODIFIER||||537|Syn|protein_coding|CODING|FBtr0089477|12);UTR_3_PRIME(MODIFIER||||597|Syn|protein_coding|CODING|FBtr0100472|12)]	(TF_binding_site|mE1_TFBS_chinmo|FBsf0000212441),(TF_binding_site|mE1_TFBS_HSA|FBsf0000370205)
X_15221752_SNP	T	G	G	0.08333	14	154	-0.1496	1.057e-06	1.85118e-06	-0.1689	5.088e-07	2.06547e-06	-0.1593	1.619e-07	8.96992e-07	0.0193	0.3592	0.354227	SiteClass[FBgn0015926|dah|UPSTREAM|627;FBgn0004924|Top1|DOWNSTREAM|760],TranscriptAnnot[DOWNSTREAM(MODIFIER||||970|Top1|protein_coding|CODING|FBtr0308699|);UPSTREAM(MODIFIER||||646|dah|protein_coding|CODING|FBtr0330404|);UPSTREAM(MODIFIER||||649|dah|protein_coding|CODING|FBtr0074007|);UTR_3_PRIME(MODIFIER||||974|Top1|protein_coding|CODING|FBtr0074005|8);UTR_3_PRIME(MODIFIER||||974|Top1|protein_co…	(TF_binding_site|BDTNP1_TFBS_dl|FBsf0000319189)
X_15224058_SNP	C	T	T	0.08333	14	154	-0.1494	1.069e-06	1.90995e-06	-0.1687	5.13e-07	2.10208e-06	-0.1591	1.631e-07	9.19017e-07	0.0193	0.3591	0.354125	SiteClass[FBgn0015926|dah|SYNONYMOUS_CODING|0;FBgn0030628|CG9114|DOWNSTREAM|759],TranscriptAnnot[DOWNSTREAM(MODIFIER||||619|CG9114|protein_coding|CODING|FBtr0074020|);SYNONYMOUS_CODING(LOW|SILENT|atT/atC|I463|646|dah|protein_coding|CODING|FBtr0330404|);SYNONYMOUS_CODING(LOW|SILENT|atT/atC|I466|649|dah|protein_coding|CODING|FBtr0074007|)]	(TF_binding_site|mE1_TFBS_chinmo|FBsf0000208951)
3L_15508763_SNP	A	T	A	0.1758	29	136	-0.1054	2.63e-06	9.22783e-07	-0.07972	0.001582	0.000297525	-0.09257	4.157e-05	7.78693e-06	-0.02569	0.09753	0.0914319	SiteClass[FBgn0036503|CG13454|DOWNSTREAM|870],TranscriptAnnot[DOWNSTREAM(MODIFIER||||112|CG13454|protein_coding|CODING|FBtr0075603|);INTERGENIC(MODIFIER|||||||||)]	(regulatory_region|REDfly_CRMs|FBsf0000436003),(TF_binding_site|BDTNP1_TFBS_bcd|FBsf0000333910),(TF_binding_site|BDTNP1_TFBS_dl|FBsf0000307721),(TF_binding_site|BDTNP1_TFBS_twi|FBsf0000203924),(TF_binding_site|mE1_TFBS_HSA|FBsf0000365540),(TF_binding_site|mE1_TFBS_Kr|FBsf0000253592)
2R_8676641_SNP	A	C	C	0.1242	20	141	-0.02617	0.3405	0.445288	-0.1107	0.0001938	0.000270464	-0.06842	0.01188	0.0236529	0.08451	1.763e-06	9.44392e-07	SiteClass[FBgn0003326|sca|INTRON|0],TranscriptAnnot[INTRON(MODIFIER||||799|sca|protein_coding|CODING|FBtr0087855|2);INTRON(MODIFIER||||799|sca|protein_coding|CODING|FBtr0087856|2)]	-
2R_8063706_SNP	G	C	G	0.06918	11	148	-0.1652	1.526e-06	9.87715e-07	-0.1328	0.0003527	0.00141192	-0.149	1.295e-05	5.04986e-05	-0.03233	0.1295	0.164929	SiteClass[FBgn0010621|Cct5|SYNONYMOUS_CODING|0],TranscriptAnnot[SYNONYMOUS_CODING(LOW|SILENT|gtG/gtC|V161|512|Cct5|protein_coding|CODING|FBtr0087988|);SYNONYMOUS_CODING(LOW|SILENT|gtG/gtC|V191|542|Cct5|protein_coding|CODING|FBtr0087987|)]	(TF_binding_site|mE1_TFBS_cad|FBsf0000246425),(TF_binding_site|mE1_TFBS_chinmo|FBsf0000211130),(TF_binding_site|mE1_TFBS_sens|FBsf0000227528)
3R_9203094_SNP	C	G	G	0.1562	25	135	-0.1213	4.048e-07	1.03116e-06	-0.07891	0.003428	0.0115395	-0.1001	3.321e-05	0.000189678	-0.04243	0.01032	0.00841196	SiteClass[FBgn0038144|CG8870|INTRON|0;FBgn0038143|CG9813|INTRON|0;FBgn0264987|CR44138|EXON|0],TranscriptAnnot[EXON(MODIFIER|||||CR44138|ncRNA|NON_CODING|FBtr0335457|1);INTRON(MODIFIER||||348|CG8870|protein_coding|CODING|FBtr0335456|1);INTRON(MODIFIER||||424|CG9813|protein_coding|CODING|FBtr0082767|4);INTRON(MODIFIER||||424|CG9813|protein_coding|CODING|FBtr0082770|4);INTRON(MODIFIER||||556|CG9813|…	-
2R_9247087_SNP	A	G	A	0.05488	9	155	0.01194	0.7524	0.742562	-0.1088	0.007265	0.0107915	-0.04842	0.1928	0.218753	0.1207	1.196e-06	1.06786e-06	SiteClass[|||],TranscriptAnnot[INTERGENIC(MODIFIER|||||||||)]	-
2R_5436340_DEL	T	TTT	TTT	0.0875	14	146	-0.148	2.025e-06	1.07959e-06	-0.1464	2.241e-05	1.1406e-05	-0.1472	2.28e-06	1.13284e-06	-0.001679	0.9366	0.935991	SiteClass[FBgn0033421|CG1888|UPSTREAM|701],TranscriptAnnot[INTERGENIC(MODIFIER|||||||||);UPSTREAM(MODIFIER||||372|CG1888|protein_coding|CODING|FBtr0310031|);UPSTREAM(MODIFIER||||372|CG1888|protein_coding|CODING|FBtr0310033|)]	(TF_binding_site|BDTNP1_TFBS_da|FBsf0000323611),(TF_binding_site|BDTNP1_TFBS_dl|FBsf0000300898),(TF_binding_site|BDTNP1_TFBS_Med|FBsf0000279679),(TF_binding_site|BDTNP1_TFBS_twi|FBsf0000198857),(TF_binding_site|BDTNP1_TFBS_z|FBsf0000196435),(TF_binding_site|mE1_TFBS_HSA|FBsf0000354959),(TF_binding_site|mE1_TFBS_Trl|FBsf0000338196)
X_7802873_SNP	A	G	G	0.1091	18	147	-0.09945	0.000148	0.000451372	-0.1337	4.705e-06	1.08534e-06	-0.1166	8.079e-06	5.94194e-06	0.03428	0.06731	0.0648383	SiteClass[FBgn0029975|CG1444|UPSTREAM|38;FBgn0029974|dpr14|UPSTREAM|554],TranscriptAnnot[INTERGENIC(MODIFIER|||||||||);UPSTREAM(MODIFIER||||321|CG1444|protein_coding|CODING|FBtr0071091|);UPSTREAM(MODIFIER||||340|dpr14|protein_coding|CODING|FBtr0307270|)]	(TF_binding_site|BDTNP1_TFBS_dl|FBsf0000317479),(TF_binding_site|mE1_TFBS_HSA|FBsf0000380389),(TF_binding_site|mE1_TFBS_sens|FBsf0000220064),(TF_binding_site|mE1_TFBS_Trl|FBsf0000342615)
3R_6393220_SNP	C	T	C	0.1515	25	140	-0.1145	1.91e-06	1.09366e-06	-0.09871	0.0002244	8.29439e-05	-0.1066	9.481e-06	2.40445e-06	-0.01579	0.3359	0.32959	SiteClass[FBgn0001235|hth|INTRON|0],TranscriptAnnot[INTRON(MODIFIER||||458|hth|protein_coding|CODING|FBtr0301956|5);INTRON(MODIFIER||||472|hth|protein_coding|CODING|FBtr0082256|6);INTRON(MODIFIER||||487|hth|protein_coding|CODING|FBtr0082255|6)]	-
3R_10534764_DEL	T	TGCTTC	TGCTTC	0.05455	9	156	-0.08555	0.02771	0.015894	-0.1871	8.076e-06	1.10829e-06	-0.1363	0.00039	4.18929e-05	0.1016	4.977e-05	4.8568e-05	SiteClass[FBgn0262127|kibra|INTRON|0],TranscriptAnnot[INTRON(MODIFIER||||1288|kibra|protein_coding|CODING|FBtr0100008|1)]	-
3L_23347639_DEL	C	CCTGCACAGATCGATGAT	CCTGCACAGATCGATGAT	0.2152	34	124	-0.06189	0.005269	0.00251162	-0.1041	1.229e-05	1.1125e-06	-0.08299	0.000145	1.76253e-05	0.04221	0.003538	0.00311767	SiteClass[|||],TranscriptAnnot[INTERGENIC(MODIFIER|||||||||)]	-
3R_25828112_SNP	G	T	T	0.09259	15	147	-0.1454	9.93e-07	1.11552e-06	-0.1423	1.132e-05	4.48221e-05	-0.1439	1.331e-06	4.32764e-06	-0.003061	0.8655	0.879864	SiteClass[FBgn0039734|Tace|INTRON|0],TranscriptAnnot[INTRON(MODIFIER||||262|Tace|protein_coding|CODING|FBtr0085550|4);INTRON(MODIFIER||||732|Tace|protein_coding|CODING|FBtr0085551|6)]	(TF_binding_site|mE1_TFBS_chinmo|FBsf0000213741),(TF_binding_site|mE1_TFBS_HSA|FBsf0000376541)
3L_2693983_SNP	T	G	G	0.09036	15	151	-0.01877	0.5444	0.621502	-0.1139	0.00066	0.000601969	-0.06633	0.03055	0.0360439	0.09511	1.605e-06	1.12941e-06	SiteClass[FBgn0264606|CG43955|INTRON|0],TranscriptAnnot[INTRON(MODIFIER||||1314|CG43955|protein_coding|CODING|FBtr0333632|2);INTRON(MODIFIER||||643|CG43955|protein_coding|CODING|FBtr0333630|2);INTRON(MODIFIER||||643|CG43955|protein_coding|CODING|FBtr0333631|2);INTRON(MODIFIER||||969|CG43955|protein_coding|CODING|FBtr0333629|2)]	-
3R_8985973_SNP	C	T	C	0.4527	67	81	-0.08633	3.661e-06	1.14322e-06	-0.07216	0.0005501	0.000340489	-0.07925	2.371e-05	7.09835e-06	-0.01417	0.265	0.249735	SiteClass[FBgn0038118|timeout|INTRON|0],TranscriptAnnot[INTRON(MODIFIER||||1384|timeout|protein_coding|CODING|FBtr0082712|14)]	-
3R_13277130_SNP	A	T	T	0.0679	11	151	-0.1633	1.219e-06	1.17607e-06	-0.1457	0.0001637	0.000106881	-0.1545	6.972e-06	4.48311e-06	-0.01761	0.443	0.450183	SiteClass[|||],TranscriptAnnot[INTERGENIC(MODIFIER|||||||||)]	-
3R_6527980_SNP	G	A	A	0.1519	24	134	-0.1016	5.693e-05	2.29414e-05	-0.1196	1.105e-05	1.87936e-06	-0.1106	8.696e-06	1.1761e-06	0.01795	0.2842	0.277682	SiteClass[FBgn0020385|pug|NON_SYNONYMOUS_CODING|0],TranscriptAnnot[NON_SYNONYMOUS_CODING(MODERATE|MISSENSE|Aat/Gat|N661D|934|pug|protein_coding|CODING|FBtr0082265|);NON_SYNONYMOUS_CODING(MODERATE|MISSENSE|Aat/Gat|N661D|934|pug|protein_coding|CODING|FBtr0082266|);NON_SYNONYMOUS_CODING(MODERATE|MISSENSE|Aat/Gat|N692D|965|pug|protein_coding|CODING|FBtr0305662|);NON_SYNONYMOUS_CODING(MODERATE|MISSENS…	(TF_binding_site|mE1_TFBS_chinmo|FBsf0000212466)
3L_18807947_INS	GTATG	G	G	0.09091	13	130	-0.158	1.701e-06	1.17832e-06	-0.1474	5.342e-05	0.000128341	-0.1527	3.335e-06	6.9526e-06	-0.01066	0.6419	0.623583	SiteClass[FBgn0036814|CG14073|INTRON|0],TranscriptAnnot[INTRON(MODIFIER||||2133|CG14073|protein_coding|CODING|FBtr0075084|2);INTRON(MODIFIER||||2133|CG14073|protein_coding|CODING|FBtr0332801|2)]	(TF_binding_site|BDTNP1_TFBS_dl|FBsf0000308460),(TF_binding_site|mE1_TFBS_HSA|FBsf0000366648),(TF_binding_site|mE1_TFBS_zfh1|FBsf0000334863)
X_11614865_SNP	G	T	G	0.08805	14	145	-0.1343	2.053e-05	7.54706e-06	-0.1438	2.896e-05	9.74659e-06	-0.139	8.34e-06	1.17926e-06	0.009537	0.6561	0.648251	SiteClass[FBgn0030330|Tango10|SYNONYMOUS_CODING|0;FBgn0030329|prtp|DOWNSTREAM|938],TranscriptAnnot[DOWNSTREAM(MODIFIER||||353|prtp|protein_coding|CODING|FBtr0332954|);DOWNSTREAM(MODIFIER||||416|prtp|protein_coding|CODING|FBtr0073551|);DOWNSTREAM(MODIFIER||||416|prtp|protein_coding|CODING|FBtr0303334|);DOWNSTREAM(MODIFIER||||416|prtp|protein_coding|CODING|FBtr0303335|);SYNONYMOUS_CODING(LOW|SILENT…	(TF_binding_site|BDTNP1_TFBS_dl|FBsf0000318449),(TF_binding_site|BDTNP1_TFBS_sna|FBsf0000270208),(TF_binding_site|BDTNP1_TFBS_twi|FBsf0000205756),(TF_binding_site|mE1_TFBS_cad|FBsf0000243274),(TF_binding_site|mE1_TFBS_HSA|FBsf0000381601),(TF_binding_site|mE1_TFBS_HSA|FBsf0000381602)
3R_9033221_SNP	T	C	C	0.128	21	143	-0.1263	1.041e-06	1.23515e-06	-0.09051	0.001695	0.00363135	-0.1084	2.964e-05	7.20104e-05	-0.03577	0.04074	0.0392704	SiteClass[|||],TranscriptAnnot[INTERGENIC(MODIFIER|||||||||)]	-
X_7796524_SNP	C	T	T	0.07101	12	157	-0.1184	0.0003893	0.00034486	-0.1631	6.882e-06	1.24112e-06	-0.1407	1.998e-05	3.93622e-06	0.04477	0.04575	0.0441593	SiteClass[FBgn0010292|bys|SYNONYMOUS_CODING|0],TranscriptAnnot[SYNONYMOUS_CODING(LOW|SILENT|cgT/cgC|R124|436|bys|protein_coding|CODING|FBtr0071090|)]	(TF_binding_site|BDTNP1_TFBS_dl|FBsf0000317477),(TF_binding_site|BDTNP1_TFBS_sna|FBsf0000270039),(TF_binding_site|mE1_TFBS_HSA|FBsf0000380387),(TF_binding_site|mE1_TFBS_sens|FBsf0000220062)
X_20560173_SNP	G	C	C	0.05917	10	159	-0.1454	5.685e-05	2.56415e-05	-0.1629	4.034e-05	4.55407e-06	-0.1542	1.759e-05	1.28957e-06	0.01748	0.4759	0.472624	SiteClass[|||],TranscriptAnnot[INTERGENIC(MODIFIER|||||||||)]	(enhancer|mE1_CBP_Enhancers|FBsf0000343844),(regulatory_region|REDfly_CRMs|FBsf0000435082),(regulatory_region|REDfly_CRMs|FBsf0000435704),(regulatory_region|REDfly_CRMs|FBsf0000436355),(silencer|mE1_HDAC_PRE|FBsf0000343324),(TF_binding_site|BDTNP1_TFBS_da|FBsf0000333244),(TF_binding_site|BDTNP1_TFBS_dl|FBsf0000320632),(TF_binding_site|BDTNP1_TFBS_slp1|FBsf0000273638),(TF_binding_site|BDTNP1_TFBS_…
X_20560174_SNP	A	C	C	0.05917	10	159	-0.1454	5.685e-05	2.56415e-05	-0.1629	4.034e-05	4.55407e-06	-0.1542	1.759e-05	1.28957e-06	0.01748	0.4759	0.472624	SiteClass[|||],TranscriptAnnot[INTERGENIC(MODIFIER|||||||||)]	(enhancer|mE1_CBP_Enhancers|FBsf0000343844),(regulatory_region|REDfly_CRMs|FBsf0000435082),(regulatory_region|REDfly_CRMs|FBsf0000435704),(regulatory_region|REDfly_CRMs|FBsf0000436355),(silencer|mE1_HDAC_PRE|FBsf0000343324),(TF_binding_site|BDTNP1_TFBS_da|FBsf0000333244),(TF_binding_site|BDTNP1_TFBS_dl|FBsf0000320632),(TF_binding_site|BDTNP1_TFBS_slp1|FBsf0000273638),(TF_binding_site|BDTNP1_TFBS_…
3R_11643316_SNP	G	A	A	0.1233	18	128	-0.09793	0.00039	0.000688191	-0.1447	1.052e-06	1.32908e-06	-0.1213	6.725e-06	1.51558e-05	0.04677	0.01615	0.0120836	SiteClass[FBgn0026616|alpha-Man-IIb|INTRON|0],TranscriptAnnot[INTRON(MODIFIER||||1249|alpha-Man-IIb|protein_coding|CODING|FBtr0083179|1);INTRON(MODIFIER||||1249|alpha-Man-IIb|protein_coding|CODING|FBtr0334593|1)]	-
2L_8091712_SNP	G	A	A	0.06098	10	154	-0.0429	0.2347	0.240395	-0.1568	5.094e-05	0.000136648	-0.09986	0.004967	0.00749894	0.1139	1.165e-06	1.33279e-06	SiteClass[FBgn0261822|Bsg|INTRON|0],TranscriptAnnot[INTRON(MODIFIER||||265|Bsg|protein_coding|CODING|FBtr0079566|2);INTRON(MODIFIER||||265|Bsg|protein_coding|CODING|FBtr0079567|2);INTRON(MODIFIER||||265|Bsg|protein_coding|CODING|FBtr0079568|2);INTRON(MODIFIER||||265|Bsg|protein_coding|CODING|FBtr0079569|2);INTRON(MODIFIER||||265|Bsg|protein_coding|CODING|FBtr0079570|2);INTRON(MODIFIER||||265|Bsg|…	(TF_binding_site|BDTNP1_TFBS_dl|FBsf0000297420),(TF_binding_site|BDTNP1_TFBS_prd|FBsf0000274924),(TF_binding_site|BDTNP1_TFBS_twi|FBsf0000201192),(TF_binding_site|mE1_TFBS_cad|FBsf0000241666)
3R_6316368_SNP	A	G	G	0.06135	10	153	-0.1714	2.391e-06	1.39456e-06	-0.1057	0.00971	0.00408637	-0.1385	0.0001562	3.6706e-05	-0.06566	0.007942	0.00648876	SiteClass[|||],TranscriptAnnot[INTERGENIC(MODIFIER|||||||||)]	(TF_binding_site|mE1_TFBS_hkb|FBsf0000255694),(TF_binding_site|mE1_TFBS_HSA|FBsf0000370298),(TF_binding_site|mE1_TFBS_inv|FBsf0000237100)
3R_12144107_SNP	T	C	T	0.351	53	98	-0.09197	1.056e-06	1.43743e-06	-0.08856	2.143e-05	8.23949e-05	-0.09027	1.64e-06	5.7821e-06	-0.003403	0.7879	0.789339	SiteClass[FBgn0040271|Sulf1|INTRON|0],TranscriptAnnot[INTRON(MODIFIER||||1114|Sulf1|protein_coding|CODING|FBtr0083273|2);INTRON(MODIFIER||||1114|Sulf1|protein_coding|CODING|FBtr0334699|3);INTRON(MODIFIER||||1114|Sulf1|protein_coding|CODING|FBtr0334700|2)]	-
2R_4053938_SNP	T	C	C	0.07879	13	152	0.01176	0.7203	0.617464	-0.08871	0.01284	0.0306099	-0.03848	0.2381	0.324561	0.1005	1.822e-06	1.48164e-06	SiteClass[FBgn0021995|Rs1|SYNONYMOUS_CODING|0;FBgn0086021|snoRNA:MeU6-C68|DOWNSTREAM|385],TranscriptAnnot[DOWNSTREAM(MODIFIER|||||snoRNA:MeU6-C68|snoRNA|NON_CODING|FBtr0114297|);SYNONYMOUS_CODING(LOW|SILENT|acC/acT|T412|782|Rs1|protein_coding|CODING|FBtr0088788|)]	(TF_binding_site|mE1_TFBS_HSA|FBsf0000354459),(TF_binding_site|mE1_TFBS_inv|FBsf0000236380),(TF_binding_site|mE1_TFBS_sens|FBsf0000226806)
2L_8962172_SNP	C	T	T	0.06962	11	147	-0.157	3.921e-06	3.98536e-06	-0.1609	1.158e-05	7.43103e-06	-0.159	1.891e-06	1.48554e-06	0.003881	0.8691	0.868007	SiteClass[FBgn0032080|CG9525|SYNONYMOUS_CODING|0;FBgn0052985|CG32985|UPSTREAM|361],TranscriptAnnot[SYNONYMOUS_CODING(LOW|SILENT|aaA/aaG|K61|659|CG9525|protein_coding|CODING|FBtr0332188|);SYNONYMOUS_CODING(LOW|SILENT|aaA/aaG|K61|678|CG9525|protein_coding|CODING|FBtr0079786|);UPSTREAM(MODIFIER||||618|CG32985|protein_coding|CODING|FBtr0079757|)]	-
3R_6522698_DEL	A	ATATA	ATATA	0.109	17	139	-0.1099	0.0001446	5.63008e-05	-0.138	7.756e-06	1.54291e-06	-0.1239	1.189e-05	1.57169e-06	0.02812	0.1454	0.141653	SiteClass[FBgn0020385|pug|INTRON|0;FBgn0037822|CG14683|INTRON|0;FBgn0262717|Skeletor|DOWNSTREAM|707],TranscriptAnnot[DOWNSTREAM(MODIFIER||||1503|Skeletor|protein_coding|CODING|FBtr0305666|);DOWNSTREAM(MODIFIER||||712|Skeletor|protein_coding|CODING|FBtr0305665|);DOWNSTREAM(MODIFIER||||784|Skeletor|protein_coding|CODING|FBtr0305664|);INTRON(MODIFIER||||356|CG14683|protein_coding|CODING|FBtr0082267|…	(TF_binding_site|BDTNP1_TFBS_da|FBsf0000328855),(TF_binding_site|BDTNP1_TFBS_dl|FBsf0000310999),(TF_binding_site|BDTNP1_TFBS_Med|FBsf0000284967),(TF_binding_site|mE1_TFBS_HSA|FBsf0000370382),(TF_binding_site|mE1_TFBS_kn|FBsf0000336607),(TF_binding_site|mE1_TFBS_Ubx|FBsf0000262654)
3R_8988335_SNP	G	C	C	0.3145	50	109	-0.08053	3.035e-05	1.1534e-05	-0.08904	2.626e-05	5.50713e-06	-0.08479	9.731e-06	1.57442e-06	0.008509	0.5176	0.504684	SiteClass[FBgn0038118|timeout|NON_SYNONYMOUS_CODING|0],TranscriptAnnot[NON_SYNONYMOUS_CODING(MODERATE|MISSENSE|gaC/gaG|D988E|1384|timeout|protein_coding|CODING|FBtr0082712|)]	-
3L_19147363_SNP	A	G	G	0.05455	9	156	-0.02631	0.4991	0.660373	-0.1452	0.0005838	0.00278135	-0.08574	0.02643	0.0810147	0.1189	2.097e-06	1.59352e-06	SiteClass[FBgn0016797|fz2|INTRON|0],TranscriptAnnot[INTRON(MODIFIER||||694|fz2|protein_coding|CODING|FBtr0075028|2);INTRON(MODIFIER||||694|fz2|protein_coding|CODING|FBtr0112890|2);INTRON(MODIFIER||||694|fz2|protein_coding|CODING|FBtr0299586|6);INTRON(MODIFIER||||694|fz2|protein_coding|CODING|FBtr0330194|5);INTRON(MODIFIER||||694|fz2|protein_coding|CODING|FBtr0332735|2);INTRON(MODIFIER||||806|fz2|…	(TF_binding_site|BDTNP1_TFBS_twi|FBsf0000204262),(TF_binding_site|mE1_TFBS_cad|FBsf0000245372),(TF_binding_site|mE1_TFBS_HSA|FBsf0000366767)
2R_16765148_SNP	A	G	G	0.07273	12	153	-0.1312	5.179e-05	3.02037e-05	-0.1481	4.619e-05	7.01642e-06	-0.1397	1.75e-05	1.59471e-06	0.01688	0.4567	0.450611	SiteClass[FBgn0050295|Ipk1|NON_SYNONYMOUS_CODING|0],TranscriptAnnot[NON_SYNONYMOUS_CODING(MODERATE|MISSENSE|Ggc/Agc|G396S|621|Ipk1|protein_coding|CODING|FBtr0071515|);NON_SYNONYMOUS_CODING(MODERATE|MISSENSE|Ggc/Agc|G396S|715|Ipk1|protein_coding|CODING|FBtr0332465|);NON_SYNONYMOUS_CODING(MODERATE|MISSENSE|Ggc/Agc|G396S|716|Ipk1|protein_coding|CODING|FBtr0113368|)]	-
2R_9388205_INS	AG	A	A	0.07927	13	151	-0.1536	6.102e-07	1.60454e-06	-0.1587	5.316e-06	1.4698e-05	-0.1561	4.922e-07	1.99694e-06	0.005094	0.8144	0.813518	SiteClass[FBgn0004638|drk|INTRON|0],TranscriptAnnot[INTRON(MODIFIER||||211|drk|protein_coding|CODING|FBtr0087693|2);INTRON(MODIFIER||||211|drk|protein_coding|CODING|FBtr0087694|2);INTRON(MODIFIER||||211|drk|protein_coding|CODING|FBtr0087695|2);INTRON(MODIFIER||||211|drk|protein_coding|CODING|FBtr0087696|2);INTRON(MODIFIER||||211|drk|protein_coding|CODING|FBtr0087697|2);INTRON(MODIFIER||||211|drk|…	(TF_binding_site|BDTNP1_TFBS_da|FBsf0000324115),(TF_binding_site|BDTNP1_TFBS_dl|FBsf0000301888),(TF_binding_site|BDTNP1_TFBS_Med|FBsf0000280211),(TF_binding_site|BDTNP1_TFBS_twi|FBsf0000199269),(TF_binding_site|mE1_TFBS_HSA|FBsf0000356357),(TF_binding_site|mE1_TFBS_sens|FBsf0000227814)
3L_15116107_SNP	A	G	G	0.06369	10	147	-0.1743	7.865e-07	1.61583e-06	-0.1235	0.002373	0.0037291	-0.1489	3.642e-05	8.71896e-05	-0.05082	0.03687	0.0362068	SiteClass[FBgn0036480|Cep135|INTRON|0;FBgn0036481|CG16959|SYNONYMOUS_CODING|0;FBgn0052847|CG32847|DOWNSTREAM|706],TranscriptAnnot[DOWNSTREAM(MODIFIER||||164|CG32847|protein_coding|CODING|FBtr0075639|);INTRON(MODIFIER||||1059|Cep135|protein_coding|CODING|FBtr0075638|7);INTRON(MODIFIER||||1065|Cep135|protein_coding|CODING|FBtr0303375|7);INTRON(MODIFIER||||960|Cep135|protein_coding|CODING|FBtr033385…	-
3R_6386599_SNP	C	G	G	0.06748	11	152	-0.1641	1.62e-06	1.63843e-06	-0.09552	0.01417	0.00579315	-0.1298	0.0001911	5.13383e-05	-0.06862	0.002931	0.00288289	SiteClass[FBgn0001235|hth|INTRON|0],TranscriptAnnot[INTRON(MODIFIER||||218|hth|protein_coding|CODING|FBtr0301345|1);INTRON(MODIFIER||||458|hth|protein_coding|CODING|FBtr0301956|6);INTRON(MODIFIER||||472|hth|protein_coding|CODING|FBtr0082256|7);INTRON(MODIFIER||||487|hth|protein_coding|CODING|FBtr0082255|7)]	(TF_binding_site|mE1_TFBS_HSA|FBsf0000370320)
X_6699772_SNP	A	G	G	0.05357	9	159	-0.167	1.014e-05	2.92886e-06	-0.1364	0.001174	4.80577e-05	-0.1517	6.145e-05	1.6388e-06	-0.03056	0.2356	0.231681	SiteClass[FBgn0029903|pod1|UTR_5_PRIME|0],TranscriptAnnot[UTR_5_PRIME(MODIFIER||||1074|pod1|protein_coding|CODING|FBtr0070964|2);UTR_5_PRIME(MODIFIER||||1074|pod1|protein_coding|CODING|FBtr0070965|2);UTR_5_PRIME(MODIFIER||||1074|pod1|protein_coding|CODING|FBtr0070966|2);UTR_5_PRIME(MODIFIER||||1074|pod1|protein_coding|CODING|FBtr0070967|2);UTR_5_PRIME(MODIFIER||||1074|pod1|protein_coding|CODING|F…	(TF_binding_site|BDTNP1_TFBS_dl|FBsf0000317145),(TF_binding_site|mE1_TFBS_Trl|FBsf0000342527)
X_11565180_SNP	C	T	T	0.1265	21	145	-0.09678	0.0002055	6.97907e-05	-0.1187	3.128e-05	2.07495e-06	-0.1077	3.06e-05	1.64169e-06	0.0219	0.2157	0.208243	SiteClass[FBgn0004370|Ptp10D|SYNONYMOUS_CODING|0],TranscriptAnnot[SYNONYMOUS_CODING(LOW|SILENT|gtT/gtC|V969|1558|Ptp10D|protein_coding|CODING|FBtr0273235|);SYNONYMOUS_CODING(LOW|SILENT|gtT/gtC|V969|1558|Ptp10D|protein_coding|CODING|FBtr0331406|);SYNONYMOUS_CODING(LOW|SILENT|gtT/gtC|V969|1631|Ptp10D|protein_coding|CODING|FBtr0073522|);SYNONYMOUS_CODING(LOW|SILENT|gtT/gtC|V969|1990|Ptp10D|protein_c…	(TF_binding_site|mE1_TFBS_cad|FBsf0000243267),(TF_binding_site|mE1_TFBS_HSA|FBsf0000381576),(TF_binding_site|mE1_TFBS_sens|FBsf0000220608)
3L_4167751_SNP	T	A	A	0.06667	11	154	-0.07599	0.03275	0.0296749	0.032	0.4156	0.350696	-0.02199	0.5378	0.559206	-0.108	2.497e-06	1.67685e-06	SiteClass[FBgn0011653|mas|UPSTREAM|287],TranscriptAnnot[INTERGENIC(MODIFIER|||||||||);UPSTREAM(MODIFIER||||1046|mas|protein_coding|CODING|FBtr0332659|);UPSTREAM(MODIFIER||||1047|mas|protein_coding|CODING|FBtr0073260|)]	(TF_binding_site|BDTNP1_TFBS_bcd|FBsf0000333811),(TF_binding_site|BDTNP1_TFBS_da|FBsf0000326025),(TF_binding_site|BDTNP1_TFBS_dl|FBsf0000305540),(TF_binding_site|BDTNP1_TFBS_gt|FBsf0000293789),(TF_binding_site|BDTNP1_TFBS_hb|FBsf0000291166),(TF_binding_site|BDTNP1_TFBS_Med|FBsf0000282144),(TF_binding_site|BDTNP1_TFBS_slp1|FBsf0000272454),(TF_binding_site|BDTNP1_TFBS_sna|FBsf0000269093),(TF_bindin…
2R_8073563_DEL	ATCCTTGCTGGCAAATTTTTAGTGTCATATTTGCTGCCCGAAA	A	ATCCTTGCTGGCAAATTTTTAGTGTCATATTTGCTGCCCGAAA	0.05031	8	151	-0.1915	1.495e-06	1.73803e-06	-0.1732	8.951e-05	0.00077986	-0.1824	4.376e-06	5.16365e-05	-0.01831	0.5097	0.499158	SiteClass[FBgn0025454|Cyp6g1|INTRON|0;FBgn0033693|CG13175|DOWNSTREAM|553;FBgn0053964|CG33964|DOWNSTREAM|553],TranscriptAnnot[DOWNSTREAM(MODIFIER||||141|CG13175|protein_coding|CODING|FBtr0100143|);DOWNSTREAM(MODIFIER||||482|CG33964|protein_coding|CODING|FBtr0100005|);INTRON(MODIFIER||||524|Cyp6g1|protein_coding|CODING|FBtr0087992|1);INTRON(MODIFIER||||524|Cyp6g1|protein_coding|CODING|FBtr0339596|1…	(regulatory_region|REDfly_CRMs|FBsf0000435668),(regulatory_region|REDfly_CRMs|FBsf0000436578)
2R_9659642_SNP	C	A	A	0.08284	14	155	-0.1048	0.0007659	0.00149979	-0.1733	2.235e-07	1.7418e-06	-0.1391	5.644e-06	4.29482e-05	0.06853	0.000912	0.000834372	SiteClass[FBgn0033867|Cpr50Ca|INTRON|0],TranscriptAnnot[INTRON(MODIFIER||||815|Cpr50Ca|protein_coding|CODING|FBtr0087629|2)]	-
2R_9659641_SNP	A	G	G	0.08333	14	154	-0.1045	0.0008165	0.00151603	-0.173	2.523e-07	1.75002e-06	-0.1388	6.239e-06	4.25797e-05	0.0685	0.0009536	0.00084278	SiteClass[FBgn0033867|Cpr50Ca|INTRON|0],TranscriptAnnot[INTRON(MODIFIER||||815|Cpr50Ca|protein_coding|CODING|FBtr0087629|2)]	-
2L_12859356_SNP	T	C	C	0.06207	9	136	1.591e-06	1	0.923279	-0.1189	0.003233	0.00857921	-0.05943	0.1108	0.176566	0.1189	2.75e-06	1.76233e-06	SiteClass[|||],TranscriptAnnot[INTERGENIC(MODIFIER|||||||||)]	(TF_binding_site|BDTNP1_TFBS_da|FBsf0000322302),(TF_binding_site|mE1_TFBS_inv|FBsf0000234900)
3L_6864582_INS	A	AGGCTTTTGTCTG	A	0.2147	35	128	-0.05344	0.01408	0.0111197	-0.1102	2.231e-06	1.78851e-06	-0.08184	0.0001307	0.000102352	0.05681	6.644e-05	4.41432e-05	SiteClass[|||],TranscriptAnnot[INTERGENIC(MODIFIER|||||||||)]	(TF_binding_site|mE1_TFBS_chinmo|FBsf0000209884),(TF_binding_site|mE1_TFBS_HSA|FBsf0000362802)
2R_8067090_SNP	T	C	T	0.0679	11	151	-0.1611	1.076e-06	1.87925e-06	-0.1352	0.0003364	0.000930038	-0.1481	9.095e-06	4.74731e-05	-0.02588	0.2772	0.26645	SiteClass[FBgn0033691|CG8860|UTR_3_PRIME|0;FBgn0033692|wash|UPSTREAM|908],TranscriptAnnot[UPSTREAM(MODIFIER||||499|wash|protein_coding|CODING|FBtr0339595|);UTR_3_PRIME(MODIFIER||||68|CG8860|protein_coding|CODING|FBtr0088011|1)]	(TF_binding_site|BDTNP1_TFBS_dl|FBsf0000301584),(TF_binding_site|BDTNP1_TFBS_Med|FBsf0000280035),(TF_binding_site|mE1_TFBS_HSA|FBsf0000355895),(TF_binding_site|mE1_TFBS_sens|FBsf0000227530),(TF_binding_site|mE1_TFBS_Ubx|FBsf0000263037)
2R_12767343_SNP	T	C	C	0.2182	36	129	-0.09933	1.886e-06	1.88959e-06	-0.07708	0.0009574	0.00257444	-0.08821	2.531e-05	8.06808e-05	-0.02225	0.1196	0.112845	SiteClass[FBgn0025833|CG8910|INTRON|0;FBgn0034166|CG6472|UPSTREAM|435],TranscriptAnnot[INTRON(MODIFIER||||608|CG8910|protein_coding|CODING|FBtr0087071|2);UPSTREAM(MODIFIER||||394|CG6472|protein_coding|CODING|FBtr0087046|)]	-
3R_6347059_SNP	A	C	C	0.2434	37	115	-0.0924	1.951e-05	1.89432e-06	-0.0544	0.02306	0.00840548	-0.0734	0.0007004	6.95703e-05	-0.038	0.008257	0.00651951	SiteClass[FBgn0001235|hth|INTRON|0],TranscriptAnnot[INTRON(MODIFIER||||218|hth|protein_coding|CODING|FBtr0301345|4);INTRON(MODIFIER||||458|hth|protein_coding|CODING|FBtr0301956|9);INTRON(MODIFIER||||472|hth|protein_coding|CODING|FBtr0082256|10);INTRON(MODIFIER||||487|hth|protein_coding|CODING|FBtr0082255|10)]	-
3R_26756974_DEL	G	GG	GG	0.05882	9	144	-0.1467	0.0001359	5.31891e-05	-0.1717	4.996e-05	4.75199e-06	-0.1592	3.234e-05	1.89891e-06	0.02492	0.3363	0.330952	SiteClass[FBgn0020912|Ptx1|DOWNSTREAM|571],TranscriptAnnot[DOWNSTREAM(MODIFIER||||318|Ptx1|protein_coding|CODING|FBtr0089390|);DOWNSTREAM(MODIFIER||||514|Ptx1|protein_coding|CODING|FBtr0089391|);INTERGENIC(MODIFIER|||||||||)]	-
3L_9900547_SNP	G	T	T	0.1824	29	130	-0.09215	6.003e-05	2.14162e-05	-0.1031	4.795e-05	6.58251e-06	-0.09764	2.013e-05	1.93442e-06	0.01098	0.4817	0.473831	SiteClass[FBgn0085385|CG34356|UPSTREAM|673],TranscriptAnnot[INTERGENIC(MODIFIER|||||||||);UPSTREAM(MODIFIER||||834|CG34356|protein_coding|CODING|FBtr0331577|);UPSTREAM(MODIFIER||||854|CG34356|protein_coding|CODING|FBtr0331579|)]	-
2L_17811793_SNP	C	G	G	0.1012	17	151	-0.1353	1.52e-06	1.935e-06	-0.09624	0.001929	0.00543357	-0.1158	3.922e-05	8.41769e-05	-0.03905	0.03408	0.0398178	SiteClass[FBgn0262018|CadN2|INTRON|0;FBgn0262017|CG42830|DOWNSTREAM|160],TranscriptAnnot[DOWNSTREAM(MODIFIER||||187|CG42830|protein_coding|CODING|FBtr0303837|);INTRON(MODIFIER||||1799|CadN2|protein_coding|CODING|FBtr0303836|3);INTRON(MODIFIER||||1799|CadN2|protein_coding|CODING|FBtr0308770|4)]	-
X_7768294_SNP	A	C	C	0.0566	9	150	-0.1171	0.002407	0.0015397	-0.1832	1.346e-05	1.93813e-06	-0.1501	8.872e-05	1.236e-05	0.06605	0.00966	0.0092806	SiteClass[FBgn0029966|Ir7c|UPSTREAM|133;FBgn0263590|CR43615|DOWNSTREAM|621],TranscriptAnnot[DOWNSTREAM(MODIFIER|||||CR43615|ncRNA|NON_CODING|FBtr0309826|);INTERGENIC(MODIFIER|||||||||);UPSTREAM(MODIFIER||||625|Ir7c|protein_coding|CODING|FBtr0071087|);UPSTREAM(MODIFIER||||625|Ir7c|protein_coding|CODING|FBtr0309827|)]	-
3R_6316751_SNP	A	G	G	0.06098	10	154	-0.1714	2.181e-06	1.94154e-06	-0.1059	0.009323	0.003991	-0.1386	0.0001459	4.91349e-05	-0.06545	0.007965	0.00665363	SiteClass[|||],TranscriptAnnot[INTERGENIC(MODIFIER|||||||||)]	(TF_binding_site|mE1_TFBS_HSA|FBsf0000370298)
3L_18253678_SNP	G	A	A	0.07317	12	152	-0.02038	0.5478	0.58928	-0.1235	0.0007564	0.000997961	-0.07194	0.03192	0.0411284	0.1031	3.201e-06	1.96196e-06	SiteClass[|||],TranscriptAnnot[INTERGENIC(MODIFIER|||||||||)]	(TF_binding_site|BDTNP1_TFBS_hb|FBsf0000291539)
2R_8669121_SNP	C	A	A	0.184	30	133	-0.03056	0.1864	0.244039	-0.1	6.211e-05	8.93418e-05	-0.0653	0.00433	0.00883497	0.06948	3.3e-06	1.98021e-06	SiteClass[FBgn0003326|sca|INTRON|0],TranscriptAnnot[INTRON(MODIFIER||||799|sca|protein_coding|CODING|FBtr0087855|1);INTRON(MODIFIER||||799|sca|protein_coding|CODING|FBtr0087856|1)]	(TF_binding_site|BDTNP1_TFBS_da|FBsf0000324016),(TF_binding_site|BDTNP1_TFBS_dl|FBsf0000301713),(TF_binding_site|BDTNP1_TFBS_Med|FBsf0000280112),(TF_binding_site|BDTNP1_TFBS_twi|FBsf0000199192)
3L_7869615_SNP	T	C	C	0.329	51	104	-0.05902	0.002875	0.00115779	-0.09432	9.857e-06	1.98262e-06	-0.07667	8.415e-05	2.33724e-05	0.0353	0.007473	0.00517467	SiteClass[FBgn0052365|CG32365|INTRON|0],TranscriptAnnot[INTRON(MODIFIER||||628|CG32365|protein_coding|CODING|FBtr0076746|2)]	-
2L_6619263_DEL	T	TCT	TCT	0.06098	10	154	-0.1703	2.441e-06	2.01983e-06	-0.08481	0.03791	0.0412632	-0.1275	0.0004889	0.00047608	-0.08546	0.0004761	0.000355517	SiteClass[FBgn0031837|CG11320|INTRON|0],TranscriptAnnot[INTRON(MODIFIER||||376|CG11320|protein_coding|CODING|FBtr0113026|1)]	-
X_15241432_SNP	G	A	A	0.06024	10	156	-0.1743	7.816e-07	2.04023e-06	-0.1785	2.39e-06	4.73044e-05	-0.1764	3.209e-07	5.94668e-06	0.004194	0.8626	0.863399	SiteClass[FBgn0030631|CG6227|INTRON|0],TranscriptAnnot[INTRON(MODIFIER||||1224|CG6227|protein_coding|CODING|FBtr0074011|3)]	(TF_binding_site|mE1_TFBS_cad|FBsf0000243445),(TF_binding_site|mE1_TFBS_HSA|FBsf0000348104),(TF_binding_site|mE1_TFBS_sens|FBsf0000220968)
3L_2688992_DEL	T	TC	TC	0.09434	15	144	-0.006743	0.8242	0.840883	-0.09989	0.002933	0.00246993	-0.05332	0.07923	0.109169	0.09314	3.981e-06	2.04587e-06	SiteClass[FBgn0264606|CG43955|INTRON|0],TranscriptAnnot[INTRON(MODIFIER||||1314|CG43955|protein_coding|CODING|FBtr0333632|3);INTRON(MODIFIER||||643|CG43955|protein_coding|CODING|FBtr0333630|3);INTRON(MODIFIER||||643|CG43955|protein_coding|CODING|FBtr0333631|3);INTRON(MODIFIER||||969|CG43955|protein_coding|CODING|FBtr0333629|3)]	-
3L_11306023_SNP	T	G	G	0.06587	11	156	-0.0401	0.2511	0.320989	-0.1472	9.136e-05	0.000188244	-0.09364	0.006584	0.0122519	0.1071	2.782e-06	2.05538e-06	SiteClass[FBgn0036153|CG7573|SYNONYMOUS_CODING|0],TranscriptAnnot[SYNONYMOUS_CODING(LOW|SILENT|ctG/ctT|L333|477|CG7573|protein_coding|CODING|FBtr0076171|)]	(TF_binding_site|mE1_TFBS_sens|FBsf0000223910)
3R_8987254_SNP	C	T	T	0.141	22	134	-0.09583	0.000229	0.00012262	-0.1246	1.248e-05	2.05887e-06	-0.1102	2.048e-05	2.74175e-06	0.02875	0.0977	0.0930061	SiteClass[FBgn0038118|timeout|INTRON|0],TranscriptAnnot[INTRON(MODIFIER||||1384|timeout|protein_coding|CODING|FBtr0082712|15)]	-
3R_11629154_SNP	T	G	G	0.06587	11	156	-0.1615	2.731e-06	2.08957e-06	-0.1632	1.82e-05	2.19871e-05	-0.1624	2.247e-06	2.6799e-06	0.001704	0.9425	0.941713	SiteClass[FBgn0038365|CG9593|NON_SYNONYMOUS_CODING|0;FBgn0026616|alpha-Man-IIb|UPSTREAM|816],TranscriptAnnot[NON_SYNONYMOUS_CODING(MODERATE|MISSENSE|Gcc/Tcc|A348S|382|CG9593|protein_coding|CODING|FBtr0307203|);UPSTREAM(MODIFIER||||1249|alpha-Man-IIb|protein_coding|CODING|FBtr0083179|)]	(TF_binding_site|BDTNP1_TFBS_dl|FBsf0000311940),(TF_binding_site|mE1_TFBS_bab1|FBsf0000214720),(TF_binding_site|mE1_TFBS_cad|FBsf0000248461),(TF_binding_site|mE1_TFBS_D|FBsf0000239979),(TF_binding_site|mE1_TFBS_HSA|FBsf0000371969),(TF_binding_site|mE1_TFBS_HSA|FBsf0000371970),(TF_binding_site|mE1_TFBS_sens|FBsf0000231956),(TF_binding_site|mE1_TFBS_Ubx|FBsf0000262721)
2L_15274491_SNP	A	G	G	0.05325	9	160	-0.09936	0.009859	0.0137346	-0.2113	2.768e-07	2.10168e-06	-0.1553	4.009e-05	0.000229653	0.1119	7.816e-06	6.68362e-06	SiteClass[FBgn0086691|UK114|INTRON|0],TranscriptAnnot[INTRON(MODIFIER||||138|UK114|protein_coding|CODING|FBtr0080746|2);INTRON(MODIFIER||||138|UK114|protein_coding|CODING|FBtr0332376|2)]	(TF_binding_site|BDTNP1_TFBS_da|FBsf0000322520),(TF_binding_site|BDTNP1_TFBS_twi|FBsf0000201777),(TF_binding_site|mE1_TFBS_cad|FBsf0000242179),(TF_binding_site|mE1_TFBS_HSA|FBsf0000351334),(TF_binding_site|mE1_TFBS_sens|FBsf0000217777)
2R_9389680_SNP	T	C	T	0.1576	26	139	-0.1053	4.383e-06	9.82599e-06	-0.1255	9.213e-07	3.02508e-06	-0.1154	4.696e-07	2.12106e-06	0.02013	0.2122	0.206191	SiteClass[FBgn0004638|drk|INTRON|0;FBgn0033845|mars|UPSTREAM|400],TranscriptAnnot[INTRON(MODIFIER||||211|drk|protein_coding|CODING|FBtr0087693|1);INTRON(MODIFIER||||211|drk|protein_coding|CODING|FBtr0087694|1);INTRON(MODIFIER||||211|drk|protein_coding|CODING|FBtr0087695|1);INTRON(MODIFIER||||211|drk|protein_coding|CODING|FBtr0087696|1);INTRON(MODIFIER||||211|drk|protein_coding|CODING|FBtr0087697|…	(TF_binding_site|BDTNP1_TFBS_da|FBsf0000324116),(TF_binding_site|BDTNP1_TFBS_dl|FBsf0000301890),(TF_binding_site|BDTNP1_TFBS_Med|FBsf0000280213),(TF_binding_site|BDTNP1_TFBS_prd|FBsf0000274399),(TF_binding_site|BDTNP1_TFBS_twi|FBsf0000199269),(TF_binding_site|mE1_TFBS_cad|FBsf0000246553),(TF_binding_site|mE1_TFBS_D|FBsf0000240611),(TF_binding_site|mE1_TFBS_HSA|FBsf0000356358),(TF_binding_site|mE1…
X_8327409_SNP	T	C	C	0.09524	16	152	-0.07713	0.009171	0.00724384	-0.1433	7.143e-06	2.12842e-06	-0.1102	0.0001603	3.85176e-05	0.06613	0.0006977	0.000612487	SiteClass[FBgn0052712|CG32712|INTRON|0;FBgn0261793|Trf2|DOWNSTREAM|365;FBgn0030037|CG12125|DOWNSTREAM|541],TranscriptAnnot[DOWNSTREAM(MODIFIER||||1715|Trf2|protein_coding|CODING|FBtr0300577|);DOWNSTREAM(MODIFIER||||525|CG12125|protein_coding|CODING|FBtr0071246|);DOWNSTREAM(MODIFIER||||632|Trf2|protein_coding|CODING|FBtr0330106|);INTRON(MODIFIER||||183|CG32712|protein_coding|CODING|FBtr0300386|2)]	(TF_binding_site|mE1_TFBS_HSA|FBsf0000380594),(TF_binding_site|mE1_TFBS_sens|FBsf0000220163)
3R_8988291_INS	TGGA	G	G	0.3077	48	108	-0.07931	5.916e-05	2.16128e-05	-0.09035	3.114e-05	5.39604e-06	-0.08483	1.579e-05	2.15991e-06	0.01104	0.4061	0.393665	SiteClass[FBgn0038118|timeout|STOP_GAINED|0],TranscriptAnnot[STOP_GAINED(HIGH||-/TGA|-974*|1384|timeout|protein_coding|CODING|FBtr0082712|18)]	-
3L_15508720_SNP	T	C	T	0.1455	24	141	-0.1094	5.185e-06	2.18434e-06	-0.07645	0.004765	0.00135443	-0.09293	0.0001224	2.71719e-05	-0.03297	0.04846	0.0444098	SiteClass[FBgn0036503|CG13454|DOWNSTREAM|913],TranscriptAnnot[DOWNSTREAM(MODIFIER||||112|CG13454|protein_coding|CODING|FBtr0075603|);INTERGENIC(MODIFIER|||||||||)]	(regulatory_region|REDfly_CRMs|FBsf0000436003),(TF_binding_site|BDTNP1_TFBS_bcd|FBsf0000333910),(TF_binding_site|BDTNP1_TFBS_dl|FBsf0000307721),(TF_binding_site|BDTNP1_TFBS_twi|FBsf0000203924),(TF_binding_site|mE1_TFBS_HSA|FBsf0000365540),(TF_binding_site|mE1_TFBS_Kr|FBsf0000253592)
3L_15044096_SNP	C	A	C	0.06748	11	152	-0.1668	1.073e-06	2.19399e-06	-0.103	0.007935	0.0186132	-0.1349	0.0001033	0.000331733	-0.06377	0.005244	0.00570091	SiteClass[FBgn0263762|CG43679|UTR_3_PRIME|0;FBgn0261090|Sytbeta|INTRON|0;FBgn0036467|CG12310|UPSTREAM|190;FBgn0036466|CG18581|UPSTREAM|787;FBgn0036468|CG13461|DOWNSTREAM|935],TranscriptAnnot[DOWNSTREAM(MODIFIER||||137|CG13461|protein_coding|CODING|FBtr0075664|);INTRON(MODIFIER||||546|Sytbeta|protein_coding|CODING|FBtr0299848|1);UPSTREAM(MODIFIER||||114|CG12310|protein_coding|CODING|FBtr0075665|);…	-
X_6015224_SNP	T	C	C	0.1747	29	137	-0.1056	2.424e-06	2.23996e-06	-0.07425	0.003243	0.00508369	-0.0899	6.81e-05	8.69697e-05	-0.03131	0.04208	0.0391405	SiteClass[FBgn0264386|Ca-alpha1T|INTRON|0],TranscriptAnnot[INTRON(MODIFIER||||3180|Ca-alpha1T|protein_coding|CODING|FBtr0304609|15);INTRON(MODIFIER||||3188|Ca-alpha1T|protein_coding|CODING|FBtr0089393|16);INTRON(MODIFIER||||3200|Ca-alpha1T|protein_coding|CODING|FBtr0304610|16);INTRON(MODIFIER||||3205|Ca-alpha1T|protein_coding|CODING|FBtr0112953|16);INTRON(MODIFIER||||3218|Ca-alpha1T|protein_codin…	(TF_binding_site|BDTNP1_TFBS_dl|FBsf0000316963),(TF_binding_site|mE1_TFBS_HSA|FBsf0000379758)
3L_9516275_SNP	A	T	T	0.09524	16	152	-0.1318	4.398e-06	2.26e-06	-0.1101	0.0006147	0.00024027	-0.121	2.714e-05	5.16891e-06	-0.02168	0.2732	0.268649	SiteClass[FBgn0053700|CG33700|INTRON|0],TranscriptAnnot[INTRON(MODIFIER||||175|CG33700|protein_coding|CODING|FBtr0301069|1)]	-
3R_6652633_DEL	T	TT	TT	0.1104	17	137	-0.1332	5.524e-06	2.30698e-06	-0.1206	0.0001532	0.000286352	-0.1269	1.251e-05	1.31559e-05	-0.01262	0.5133	0.511115	SiteClass[FBgn0261053|Cad86C|UPSTREAM|167],TranscriptAnnot[INTERGENIC(MODIFIER|||||||||);UPSTREAM(MODIFIER||||1008|Cad86C|protein_coding|CODING|FBtr0304666|);UPSTREAM(MODIFIER||||1915|Cad86C|protein_coding|CODING|FBtr0304664|);UPSTREAM(MODIFIER||||1943|Cad86C|protein_coding|CODING|FBtr0301933|);UPSTREAM(MODIFIER||||1943|Cad86C|protein_coding|CODING|FBtr0304663|);UPSTREAM(MODIFIER||||1949|Cad86C|p…	(TF_binding_site|BDTNP1_TFBS_dl|FBsf0000311009),(TF_binding_site|mE1_TFBS_D|FBsf0000239859),(TF_binding_site|mE1_TFBS_HSA|FBsf0000370425),(TF_binding_site|mE1_TFBS_HSA|FBsf0000370426),(TF_binding_site|mE1_TFBS_Trl|FBsf0000340862)
2R_6355258_SNP	T	G	G	0.06627	11	155	-0.1647	1.744e-06	2.31923e-06	-0.1284	0.0008613	0.000740624	-0.1465	2.306e-05	4.46338e-05	-0.03629	0.1213	0.11827	SiteClass[FBgn0033526|Caf1-105|SYNONYMOUS_CODING|0;FBgn0033527|CG11777|UPSTREAM|863],TranscriptAnnot[SYNONYMOUS_CODING(LOW|SILENT|Cga/Aga|R212|747|Caf1-105|protein_coding|CODING|FBtr0088310|);UPSTREAM(MODIFIER||||161|CG11777|protein_coding|CODING|FBtr0088273|)]	(TF_binding_site|BDTNP1_TFBS_dl|FBsf0000301121),(TF_binding_site|BDTNP1_TFBS_Med|FBsf0000279795),(TF_binding_site|BDTNP1_TFBS_twi|FBsf0000198960),(TF_binding_site|mE1_TFBS_cad|FBsf0000246268),(TF_binding_site|mE1_TFBS_HSA|FBsf0000355292),(TF_binding_site|mE1_TFBS_sens|FBsf0000227214)
3R_9216135_SNP	A	T	T	0.2857	44	110	-0.0943	3.334e-06	2.32983e-06	-0.07458	0.0008429	0.00230273	-0.08444	2.985e-05	6.1345e-05	-0.01972	0.1465	0.137658	SiteClass[FBgn0038147|CCHa2|INTRON|0],TranscriptAnnot[INTRON(MODIFIER||||136|CCHa2|protein_coding|CODING|FBtr0082762|2);INTRON(MODIFIER||||136|CCHa2|protein_coding|CODING|FBtr0303262|2);INTRON(MODIFIER||||136|CCHa2|protein_coding|CODING|FBtr0303263|2)]	-
2L_14039229_SNP	T	C	C	0.1562	25	135	-0.08306	0.0006883	0.000626723	-0.1195	4.555e-06	2.33838e-06	-0.1013	2.311e-05	1.25985e-05	0.03643	0.0256	0.0240639	SiteClass[FBgn0028875|nAcRalpha-34E|UPSTREAM|941],TranscriptAnnot[INTERGENIC(MODIFIER|||||||||);UPSTREAM(MODIFIER||||482|nAcRalpha-34E|protein_coding|CODING|FBtr0301836|);UPSTREAM(MODIFIER||||808|nAcRalpha-34E|protein_coding|CODING|FBtr0080594|);UPSTREAM(MODIFIER||||808|nAcRalpha-34E|protein_coding|CODING|FBtr0300594|);UPSTREAM(MODIFIER||||808|nAcRalpha-34E|protein_coding|CODING|FBtr0309867|)]	(TF_binding_site|BDTNP1_TFBS_dl|FBsf0000298573),(TF_binding_site|mE1_TFBS_cad|FBsf0000242101)
X_21888860_SNP	A	T	T	0.08974	14	142	-0.1391	8.894e-06	2.3631e-06	-0.0648	0.06529	0.019287	-0.1019	0.00126	0.000120135	-0.07428	0.0003783	0.000297253	SiteClass[FBgn0027279|l(1)G0196|UPSTREAM|156;FBgn0263504|CR43493|DOWNSTREAM|830;FBgn0031191|Cp110|DOWNSTREAM|904],TranscriptAnnot[DOWNSTREAM(MODIFIER||||549|Cp110|protein_coding|CODING|FBtr0339500|);DOWNSTREAM(MODIFIER||||666|Cp110|protein_coding|CODING|FBtr0100651|);DOWNSTREAM(MODIFIER||||666|Cp110|protein_coding|CODING|FBtr0339501|);DOWNSTREAM(MODIFIER|||||CR43493|ncRNA|NON_CODING|FBtr0309524|)…	-
3L_2696459_SNP	C	T	T	0.07784	13	154	-0.02286	0.4873	0.592072	-0.1214	0.0006512	0.000886944	-0.07213	0.02698	0.0451344	0.09856	3.184e-06	2.3777e-06	SiteClass[FBgn0264606|CG43955|INTRON|0],TranscriptAnnot[INTRON(MODIFIER||||1314|CG43955|protein_coding|CODING|FBtr0333632|2);INTRON(MODIFIER||||643|CG43955|protein_coding|CODING|FBtr0333630|2);INTRON(MODIFIER||||643|CG43955|protein_coding|CODING|FBtr0333631|2);INTRON(MODIFIER||||969|CG43955|protein_coding|CODING|FBtr0333629|2)]	-
3R_13346792_SNP	C	A	C	0.3758	56	93	-0.083	1.602e-05	3.98119e-06	-0.08612	5.642e-05	1.7349e-05	-0.08456	1.156e-05	2.39049e-06	0.003113	0.81	0.805451	SiteClass[|||],TranscriptAnnot[INTERGENIC(MODIFIER|||||||||)]	-
3R_20980773_SNP	C	G	G	0.07595	12	146	-0.1109	0.001131	0.000502911	-0.1603	1.527e-05	2.44169e-06	-0.1356	5.685e-05	8.45369e-06	0.04937	0.0319	0.0266633	SiteClass[|||],TranscriptAnnot[INTERGENIC(MODIFIER|||||||||)]	-
X_15212262_SNP	T	C	C	0.07831	13	153	-0.1519	1.929e-06	6.53411e-06	-0.18	2.462e-07	2.44253e-06	-0.1659	1.488e-07	2.50374e-06	0.02804	0.1996	0.192749	SiteClass[FBgn0261703|gce|UTR_3_PRIME|0],TranscriptAnnot[UTR_3_PRIME(MODIFIER||||918|gce|protein_coding|CODING|FBtr0310309|10);UTR_3_PRIME(MODIFIER||||959|gce|protein_coding|CODING|FBtr0303198|10);UTR_3_PRIME(MODIFIER||||959|gce|protein_coding|CODING|FBtr0303199|10);UTR_3_PRIME(MODIFIER||||959|gce|protein_coding|CODING|FBtr0310308|10);UTR_3_PRIME(MODIFIER||||959|gce|protein_coding|CODING|FBtr0331…	-
X_15212099_SNP	G	T	T	0.07927	13	151	-0.1528	1.779e-06	5.98398e-06	-0.1819	1.897e-07	2.56499e-06	-0.1673	1.208e-07	2.47959e-06	0.0291	0.186	0.176619	SiteClass[FBgn0261703|gce|UTR_3_PRIME|0],TranscriptAnnot[UTR_3_PRIME(MODIFIER||||918|gce|protein_coding|CODING|FBtr0310309|10);UTR_3_PRIME(MODIFIER||||959|gce|protein_coding|CODING|FBtr0303198|10);UTR_3_PRIME(MODIFIER||||959|gce|protein_coding|CODING|FBtr0303199|10);UTR_3_PRIME(MODIFIER||||959|gce|protein_coding|CODING|FBtr0310308|10);UTR_3_PRIME(MODIFIER||||959|gce|protein_coding|CODING|FBtr0331…	-
3R_6196409_SNP	G	A	A	0.09938	16	145	-0.1201	4.741e-05	1.95445e-05	-0.126	0.0001028	1.64928e-05	-0.123	2.698e-05	2.54323e-06	0.005977	0.768	0.76136	SiteClass[FBgn0020379|Rfx|INTRON|0],TranscriptAnnot[INTRON(MODIFIER||||889|Rfx|protein_coding|CODING|FBtr0337106|3);INTRON(MODIFIER||||897|Rfx|protein_coding|CODING|FBtr0337107|3);INTRON(MODIFIER||||911|Rfx|protein_coding|CODING|FBtr0305995|3);INTRON(MODIFIER||||919|Rfx|protein_coding|CODING|FBtr0337105|3)]	(TF_binding_site|BDTNP1_TFBS_da|FBsf0000328792),(TF_binding_site|BDTNP1_TFBS_dl|FBsf0000310904),(TF_binding_site|BDTNP1_TFBS_Med|FBsf0000284935),(TF_binding_site|BDTNP1_TFBS_prd|FBsf0000276419),(TF_binding_site|BDTNP1_TFBS_twi|FBsf0000264649),(TF_binding_site|mE1_TFBS_HSA|FBsf0000370257)
X_11606730_SNP	A	C	C	0.05917	10	159	-0.1189	0.001094	0.000642475	-0.1717	1.432e-05	2.55405e-06	-0.1453	5.49e-05	7.16357e-06	0.05274	0.03047	0.0292497	SiteClass[FBgn0030328|Amun|INTRON|0],TranscriptAnnot[INTRON(MODIFIER||||550|Amun|protein_coding|CODING|FBtr0073615|3);INTRON(MODIFIER||||550|Amun|protein_coding|CODING|FBtr0073616|2);INTRON(MODIFIER||||550|Amun|protein_coding|CODING|FBtr0073617|2);INTRON(MODIFIER||||550|Amun|protein_coding|CODING|FBtr0073618|3);INTRON(MODIFIER||||550|Amun|protein_coding|CODING|FBtr0073619|3);INTRON(MODIFIER||||55…	(TF_binding_site|BDTNP1_TFBS_dl|FBsf0000318441)
2R_9391858_SNP	G	A	A	0.08589	14	149	-0.1466	6.998e-07	2.57641e-06	-0.1247	0.0002149	0.000647181	-0.1356	5.532e-06	2.97669e-05	-0.02197	0.3008	0.292043	SiteClass[FBgn0033845|mars|NON_SYNONYMOUS_CODING|0],TranscriptAnnot[NON_SYNONYMOUS_CODING(MODERATE|MISSENSE|Acc/Gcc|T440A|921|mars|protein_coding|CODING|FBtr0087668|);NON_SYNONYMOUS_CODING(MODERATE|MISSENSE|Acc/Gcc|T440A|921|mars|protein_coding|CODING|FBtr0301387|)]	(TF_binding_site|mE1_TFBS_cad|FBsf0000246553),(TF_binding_site|mE1_TFBS_sens|FBsf0000227816)
3L_18090494_SNP	T	A	A	0.07407	12	150	-0.1222	0.000297	8.59794e-05	-0.1453	8.184e-05	6.15905e-06	-0.1337	6.375e-05	2.61941e-06	0.02314	0.3135	0.301242	SiteClass[FBgn0036773|CG13698|INTRON|0],TranscriptAnnot[INTRON(MODIFIER||||316|CG13698|protein_coding|CODING|FBtr0075137|2);INTRON(MODIFIER||||316|CG13698|protein_coding|CODING|FBtr0333698|1)]	-
2L_17847510_SNP	A	C	C	0.08383	14	153	-0.1446	1.804e-06	2.67188e-06	-0.0947	0.005425	0.0125069	-0.1196	8.649e-05	0.000186808	-0.04988	0.01731	0.0158882	SiteClass[FBgn0262018|CadN2|INTRON|0],TranscriptAnnot[INTRON(MODIFIER||||1799|CadN2|protein_coding|CODING|FBtr0308770|2)]	-
3R_9083232_SNP	G	C	C	0.1783	28	129	-0.07668	0.0006356	0.000558306	-0.1112	8.245e-06	2.72498e-06	-0.09395	2.73e-05	8.76005e-06	0.03455	0.02759	0.025483	SiteClass[FBgn0000024|Ace|INTRON|0],TranscriptAnnot[INTRON(MODIFIER||||636|Ace|protein_coding|CODING|FBtr0335223|1);INTRON(MODIFIER||||649|Ace|protein_coding|CODING|FBtr0082780|1);INTRON(MODIFIER||||649|Ace|protein_coding|CODING|FBtr0300486|2)]	-
3L_18012896_SNP	A	T	T	0.1296	21	141	-0.08833	0.00086	0.000466921	-0.1275	8.658e-06	2.74125e-06	-0.1079	3.637e-05	8.60707e-06	0.03922	0.02745	0.0237668	SiteClass[FBgn0000568|Eip75B|INTRON|0],TranscriptAnnot[INTRON(MODIFIER||||1412|Eip75B|protein_coding|CODING|FBtr0075148|1);INTRON(MODIFIER||||1412|Eip75B|protein_coding|CODING|FBtr0306813|3);INTRON(MODIFIER||||1412|Eip75B|protein_coding|CODING|FBtr0306814|3)]	(TF_binding_site|BDTNP1_TFBS_dl|FBsf0000308305),(TF_binding_site|mE1_TFBS_HSA|FBsf0000366409),(TF_binding_site|mE1_TFBS_zfh1|FBsf0000334855)
3L_2696284_SNP	A	G	G	0.08383	14	153	-0.01629	0.6086	0.714859	-0.111	0.001283	0.0017987	-0.06363	0.04368	0.0686038	0.09467	3.771e-06	2.78385e-06	SiteClass[FBgn0264606|CG43955|INTRON|0],TranscriptAnnot[INTRON(MODIFIER||||1314|CG43955|protein_coding|CODING|FBtr0333632|2);INTRON(MODIFIER||||643|CG43955|protein_coding|CODING|FBtr0333630|2);INTRON(MODIFIER||||643|CG43955|protein_coding|CODING|FBtr0333631|2);INTRON(MODIFIER||||969|CG43955|protein_coding|CODING|FBtr0333629|2)]	-
X_11615081_SNP	G	A	G	0.08876	15	154	-0.1212	5.224e-05	2.87639e-05	-0.1364	3.375e-05	1.18381e-05	-0.1288	1.516e-05	2.7855e-06	0.01522	0.4543	0.450956	SiteClass[FBgn0030330|Tango10|INTRON|0],TranscriptAnnot[INTRON(MODIFIER||||587|Tango10|protein_coding|CODING|FBtr0073552|1);INTRON(MODIFIER||||587|Tango10|protein_coding|CODING|FBtr0073553|1);INTRON(MODIFIER||||587|Tango10|protein_coding|CODING|FBtr0332955|2)]	(TF_binding_site|BDTNP1_TFBS_dl|FBsf0000318449),(TF_binding_site|BDTNP1_TFBS_sna|FBsf0000270208),(TF_binding_site|BDTNP1_TFBS_twi|FBsf0000205756),(TF_binding_site|mE1_TFBS_cad|FBsf0000243274),(TF_binding_site|mE1_TFBS_HSA|FBsf0000381602),(TF_binding_site|mE1_TFBS_sens|FBsf0000220627)
X_15217450_SNP	G	T	T	0.1024	17	149	-0.1141	6.152e-05	0.000127841	-0.1538	6.478e-07	2.86001e-06	-0.134	1.875e-06	1.29932e-05	0.03965	0.04011	0.0369408	SiteClass[FBgn0004924|Top1|INTRON|0],TranscriptAnnot[INTRON(MODIFIER||||581|Top1|protein_coding|CODING|FBtr0074006|1);INTRON(MODIFIER||||970|Top1|protein_coding|CODING|FBtr0308699|4);INTRON(MODIFIER||||974|Top1|protein_coding|CODING|FBtr0074005|4);INTRON(MODIFIER||||974|Top1|protein_coding|CODING|FBtr0100294|4)]	(TF_binding_site|BDTNP1_TFBS_dl|FBsf0000319187),(TF_binding_site|BDTNP1_TFBS_twi|FBsf0000263327),(TF_binding_site|mE1_TFBS_cad|FBsf0000243443),(TF_binding_site|mE1_TFBS_HSA|FBsf0000348092)
3L_2692871_SNP	T	A	A	0.08434	14	152	-0.008136	0.7982	0.847724	-0.1027	0.002705	0.00287003	-0.05542	0.07806	0.091121	0.09456	3.313e-06	2.88628e-06	SiteClass[FBgn0264606|CG43955|INTRON|0],TranscriptAnnot[INTRON(MODIFIER||||1314|CG43955|protein_coding|CODING|FBtr0333632|2);INTRON(MODIFIER||||643|CG43955|protein_coding|CODING|FBtr0333630|2);INTRON(MODIFIER||||643|CG43955|protein_coding|CODING|FBtr0333631|2);INTRON(MODIFIER||||969|CG43955|protein_coding|CODING|FBtr0333629|2)]	-
3R_13277248_SNP	T	A	A	0.05455	9	156	-0.177	2.613e-06	2.91795e-06	-0.1188	0.005241	0.00789417	-0.1479	0.0001012	0.000153591	-0.0582	0.02458	0.0220218	SiteClass[|||],TranscriptAnnot[INTERGENIC(MODIFIER|||||||||)]	-
3R_8986185_SNP	A	G	G	0.4333	65	85	-0.07711	4.764e-05	1.35533e-05	-0.08546	3.375e-05	1.28827e-05	-0.08128	1.514e-05	2.94484e-06	0.008348	0.5046	0.497445	SiteClass[FBgn0038118|timeout|INTRON|0],TranscriptAnnot[INTRON(MODIFIER||||1384|timeout|protein_coding|CODING|FBtr0082712|14)]	-
2R_8067842_SNP	G	A	G	0.06173	10	152	-0.1666	1.416e-06	2.94732e-06	-0.1319	0.0008496	0.00259969	-0.1492	2.062e-05	0.000124571	-0.03471	0.156	0.153563	SiteClass[FBgn0033692|wash|UPSTREAM|156;FBgn0033691|CG8860|UPSTREAM|435],TranscriptAnnot[INTERGENIC(MODIFIER|||||||||);UPSTREAM(MODIFIER||||499|wash|protein_coding|CODING|FBtr0087989|);UPSTREAM(MODIFIER||||499|wash|protein_coding|CODING|FBtr0339595|);UPSTREAM(MODIFIER||||68|CG8860|protein_coding|CODING|FBtr0088011|)]	(TF_binding_site|BDTNP1_TFBS_dl|FBsf0000301585),(TF_binding_site|BDTNP1_TFBS_Med|FBsf0000280035),(TF_binding_site|mE1_TFBS_HSA|FBsf0000355896),(TF_binding_site|mE1_TFBS_sens|FBsf0000227531),(TF_binding_site|mE1_TFBS_Ubx|FBsf0000263038)
3L_9639085_SNP	G	C	C	0.09036	15	151	-0.06891	0.02461	0.015369	-0.1337	5.444e-05	2.94963e-06	-0.1013	0.000819	7.6773e-05	0.0648	0.001369	0.00113861	SiteClass[FBgn0053696|CG33696|INTRON|0;FBgn0016081|fry|INTRON|0],TranscriptAnnot[INTRON(MODIFIER||||3474|fry|protein_coding|CODING|FBtr0333858|13);INTRON(MODIFIER||||3479|fry|protein_coding|CODING|FBtr0076417|13);INTRON(MODIFIER||||3490|fry|protein_coding|CODING|FBtr0306241|13);INTRON(MODIFIER||||3495|fry|protein_coding|CODING|FBtr0333860|13);INTRON(MODIFIER||||3527|fry|protein_coding|CODING|FBtr…	-
2L_8053851_SNP	A	G	G	0.0559	9	152	6.812e-05	0.9986	0.966398	-0.116	0.006109	0.00737959	-0.05795	0.1356	0.168528	0.116	3.906e-06	2.95543e-06	SiteClass[FBgn0031981|CG7466|UTR_3_PRIME|0;FBgn0011230|poe|DOWNSTREAM|471],TranscriptAnnot[DOWNSTREAM(MODIFIER||||5322|poe|protein_coding|CODING|FBtr0079545|);DOWNSTREAM(MODIFIER||||5322|poe|protein_coding|CODING|FBtr0333088|);UTR_3_PRIME(MODIFIER||||2898|CG7466|protein_coding|CODING|FBtr0079541|6)]	-
3R_3150716_SNP	A	G	G	0.1818	28	126	-0.104	7.255e-06	3.00364e-06	-0.08867	0.0003735	0.000231715	-0.09634	2.625e-05	9.20552e-06	-0.01533	0.297	0.32529	SiteClass[FBgn0265423|CG44335|UPSTREAM|603],TranscriptAnnot[INTERGENIC(MODIFIER|||||||||);UPSTREAM(MODIFIER||||107|CG44335|protein_coding|CODING|FBtr0339728|)]	-
2R_6355142_SNP	A	G	G	0.06627	11	155	-0.1618	2.774e-06	3.07848e-06	-0.123	0.00145	0.000991837	-0.1424	4.094e-05	5.68712e-05	-0.03876	0.09774	0.0950828	SiteClass[FBgn0033526|Caf1-105|SYNONYMOUS_CODING|0;FBgn0033527|CG11777|UPSTREAM|979],TranscriptAnnot[SYNONYMOUS_CODING(LOW|SILENT|ccC/ccT|P250|747|Caf1-105|protein_coding|CODING|FBtr0088310|);UPSTREAM(MODIFIER||||161|CG11777|protein_coding|CODING|FBtr0088273|)]	(TF_binding_site|BDTNP1_TFBS_dl|FBsf0000301121),(TF_binding_site|BDTNP1_TFBS_Med|FBsf0000279795),(TF_binding_site|BDTNP1_TFBS_twi|FBsf0000198960),(TF_binding_site|mE1_TFBS_cad|FBsf0000246268),(TF_binding_site|mE1_TFBS_HSA|FBsf0000355292),(TF_binding_site|mE1_TFBS_sens|FBsf0000227214)
2R_2374997_SNP	T	A	A	0.07432	11	137	-0.1276	0.0003471	0.000355931	-0.1859	1.977e-06	3.10045e-06	-0.1568	9.638e-06	1.79566e-05	0.05828	0.0157	0.0119929	SiteClass[|||],TranscriptAnnot[INTERGENIC(MODIFIER|||||||||)]	-
2R_12315843_SNP	T	C	C	0.06875	11	149	-0.09364	0.007763	0.00819518	0.0118	0.7628	0.696357	-0.04092	0.2467	0.286188	-0.1054	5.943e-06	3.12222e-06	SiteClass[FBgn0264273|Sema-2b|INTRON|0],TranscriptAnnot[INTRON(MODIFIER||||784|Sema-2b|protein_coding|CODING|FBtr0100001|11);INTRON(MODIFIER||||784|Sema-2b|protein_coding|CODING|FBtr0329991|12);INTRON(MODIFIER||||785|Sema-2b|protein_coding|CODING|FBtr0290009|12);INTRON(MODIFIER||||824|Sema-2b|protein_coding|CODING|FBtr0329992|12)]	(TF_binding_site|BDTNP1_TFBS_twi|FBsf0000199575)
2R_17639753_SNP	T	G	G	0.1227	20	143	-0.1145	8.838e-06	7.62713e-06	-0.1112	0.0001234	3.695e-05	-0.1129	1.298e-05	3.17222e-06	-0.003314	0.8544	0.852607	SiteClass[|||],TranscriptAnnot[INTERGENIC(MODIFIER|||||||||)]	-
3L_16488278_SNP	G	T	T	0.4065	63	92	0.01903	0.2892	0.216952	-0.03612	0.06998	0.145167	-0.008544	0.6337	0.898308	0.05514	8.308e-06	3.18198e-06	SiteClass[FBgn0263131|CG43373|INTRON|0;FBgn0053158|CG33158|INTRON|0;FBgn0260388|CG42514|INTRON|0],TranscriptAnnot[INTRON(MODIFIER||||1033|CG33158|protein_coding|CODING|FBtr0075390|5);INTRON(MODIFIER||||1240|CG43373|protein_coding|CODING|FBtr0307367|28);INTRON(MODIFIER||||533|CG42514|protein_coding|CODING|FBtr0300655|2);INTRON(MODIFIER||||533|CG42514|protein_coding|CODING|FBtr0300656|2);UTR_5_PRIM…	(TF_binding_site|mE1_TFBS_HSA|FBsf0000365897),(TF_binding_site|mE1_TFBS_inv|FBsf0000236092),(TF_binding_site|mE1_TFBS_Trl|FBsf0000340120)
3R_8988821_SNP	A	G	G	0.4103	64	92	-0.07311	2.316e-05	4.15841e-05	-0.08944	3.151e-06	4.34909e-06	-0.08127	2.094e-06	3.18457e-06	0.01633	0.1957	0.178312	SiteClass[FBgn0038118|timeout|SYNONYMOUS_CODING|0],TranscriptAnnot[SYNONYMOUS_CODING(LOW|SILENT|caG/caA|Q1150|1384|timeout|protein_coding|CODING|FBtr0082712|)]	-
2L_13944435_SNP	T	C	C	0.2922	45	109	0.02674	0.1651	0.185793	-0.033	0.1147	0.075305	-0.003128	0.8695	0.686053	0.05974	3.66e-06	3.19355e-06	SiteClass[FBgn0032536|Ance-3|INTRON|0;FBgn0028544|CG16884|DOWNSTREAM|317],TranscriptAnnot[DOWNSTREAM(MODIFIER||||277|CG16884|protein_coding|CODING|FBtr0080557|);INTRON(MODIFIER||||844|Ance-3|protein_coding|CODING|FBtr0100327|7)]	-
3R_11595869_SNP	A	C	C	0.06548	11	157	-0.1523	9.938e-06	1.85997e-05	-0.1871	6.582e-07	3.21704e-06	-0.1697	6.547e-07	3.28946e-06	0.03477	0.1385	0.134424	SiteClass[|||],TranscriptAnnot[INTERGENIC(MODIFIER|||||||||)]	-
3R_24725526_SNP	A	C	A	0.05488	9	155	-0.1715	4.674e-06	3.22049e-06	-0.1415	0.000832	0.000481678	-0.1565	3.553e-05	2.49163e-05	-0.03003	0.2424	0.240133	SiteClass[FBgn0259220|Doa|INTRON|0],TranscriptAnnot[INTRON(MODIFIER||||511|Doa|protein_coding|CODING|FBtr0299748|3);INTRON(MODIFIER||||511|Doa|protein_coding|CODING|FBtr0299752|3);INTRON(MODIFIER||||580|Doa|protein_coding|CODING|FBtr0299742|3);INTRON(MODIFIER||||580|Doa|protein_coding|CODING|FBtr0299745|3);INTRON(MODIFIER||||580|Doa|protein_coding|CODING|FBtr0299749|4);INTRON(MODIFIER||||580|Doa|…	(TF_binding_site|mE1_TFBS_cad|FBsf0000249466),(TF_binding_site|mE1_TFBS_chinmo|FBsf0000213625),(TF_binding_site|mE1_TFBS_sens|FBsf0000233935)
3R_8990428_SNP	A	C	C	0.1656	26	131	-0.09373	0.0001072	4.92361e-05	-0.1085	5.398e-05	8.8856e-06	-0.1011	2.982e-05	3.22148e-06	0.01482	0.3658	0.354826	SiteClass[FBgn0038118|timeout|DOWNSTREAM|830],TranscriptAnnot[DOWNSTREAM(MODIFIER||||1384|timeout|protein_coding|CODING|FBtr0082712|);INTERGENIC(MODIFIER|||||||||)]	-
3L_14102775_SNP	G	A	A	0.179	29	133	-0.06967	0.002767	0.00191227	-0.1106	1.079e-05	3.22371e-06	-0.09014	8.587e-05	3.023e-05	0.04092	0.008338	0.00690399	SiteClass[|||],TranscriptAnnot[INTERGENIC(MODIFIER|||||||||)]	(TF_binding_site|mE1_TFBS_zfh1|FBsf0000334831)
3L_6864339_SNP	T	A	A	0.1636	27	138	-0.06512	0.006232	0.00844892	-0.125	8.391e-07	3.36034e-06	-0.09504	4.715e-05	0.000154629	0.05983	0.0001099	9.99565e-05	SiteClass[|||],TranscriptAnnot[INTERGENIC(MODIFIER|||||||||)]	(TF_binding_site|mE1_TFBS_chinmo|FBsf0000209884),(TF_binding_site|mE1_TFBS_HSA|FBsf0000362802)
3L_3779561_SNP	T	G	G	0.1543	25	137	-0.08827	0.0003152	0.000349588	-0.1286	9.794e-07	3.37337e-06	-0.1084	6.561e-06	1.72443e-05	0.04028	0.01352	0.012364	SiteClass[FBgn0052264|CG32264|INTRON|0],TranscriptAnnot[INTRON(MODIFIER||||1008|CG32264|protein_coding|CODING|FBtr0073187|2);INTRON(MODIFIER||||759|CG32264|protein_coding|CODING|FBtr0332986|1);INTRON(MODIFIER||||822|CG32264|protein_coding|CODING|FBtr0308639|2);INTRON(MODIFIER||||927|CG32264|protein_coding|CODING|FBtr0332987|1);INTRON(MODIFIER||||937|CG32264|protein_coding|CODING|FBtr0308637|1);IN…	-
3R_26821323_SNP	C	T	T	0.07229	12	154	-0.1506	5.585e-06	3.37487e-06	-0.1333	0.0002861	0.000280314	-0.142	1.813e-05	1.78922e-05	-0.01728	0.4459	0.439876	SiteClass[FBgn0004573|5-HT7|INTRON|0],TranscriptAnnot[INTRON(MODIFIER||||564|5-HT7|protein_coding|CODING|FBtr0085746|1);INTRON(MODIFIER||||564|5-HT7|protein_coding|CODING|FBtr0334508|1)]	-
2L_6481860_SNP	T	A	A	0.2357	37	120	-0.0942	5.844e-06	3.41715e-06	-0.08233	0.0003573	0.000250795	-0.08826	2.203e-05	1.28066e-05	-0.01187	0.3978	0.397789	SiteClass[FBgn0031820|DLP|INTRON|0],TranscriptAnnot[INTRON(MODIFIER||||1659|DLP|protein_coding|CODING|FBtr0079260|1)]	(TF_binding_site|BDTNP1_TFBS_dl|FBsf0000297050),(TF_binding_site|BDTNP1_TFBS_Med|FBsf0000277761),(TF_binding_site|BDTNP1_TFBS_prd|FBsf0000274877),(TF_binding_site|mE1_TFBS_Trl|FBsf0000337285),(TF_binding_site|mE1_TFBS_Ubx|FBsf0000261799)
3R_5923913_SNP	T	C	C	0.06211	10	151	-0.1637	7.897e-06	3.43279e-06	-0.1353	0.0008524	0.000870318	-0.1495	4.452e-05	3.2816e-05	-0.02842	0.2508	0.243176	SiteClass[FBgn0263413|CR43459|EXON|0],TranscriptAnnot[EXON(MODIFIER|||||CR43459|ncRNA|NON_CODING|FBtr0309197|1)]	-
3R_7631395_SNP	C	T	T	0.05844	9	145	-0.1759	1.615e-06	3.43462e-06	-0.1382	0.00071	0.0016458	-0.1571	1.865e-05	5.64144e-05	-0.03769	0.1356	0.140703	SiteClass[FBgn0051116|ClC-a|INTRON|0],TranscriptAnnot[INTRON(MODIFIER||||1018|ClC-a|protein_coding|CODING|FBtr0300622|2);INTRON(MODIFIER||||1066|ClC-a|protein_coding|CODING|FBtr0113391|1);INTRON(MODIFIER||||1145|ClC-a|protein_coding|CODING|FBtr0301023|2);INTRON(MODIFIER||||1193|ClC-a|protein_coding|CODING|FBtr0082528|1);INTRON(MODIFIER||||221|ClC-a|protein_coding|CODING|FBtr0334891|2)]	-
3R_9058099_SNP	G	A	A	0.1677	26	129	-0.09154	0.0001978	8.65245e-05	-0.1135	1.811e-05	5.53779e-06	-0.1025	2.271e-05	3.43686e-06	0.02193	0.1812	0.170998	SiteClass[FBgn0000024|Ace|INTRON|0],TranscriptAnnot[INTRON(MODIFIER||||636|Ace|protein_coding|CODING|FBtr0335223|9);INTRON(MODIFIER||||649|Ace|protein_coding|CODING|FBtr0082780|9);INTRON(MODIFIER||||649|Ace|protein_coding|CODING|FBtr0300486|10)]	-
2L_8076495_SNP	A	G	G	0.05521	9	154	-0.1756	3.619e-06	3.47053e-06	-0.1583	0.0001453	0.000385525	-0.1669	9.596e-06	2.04167e-05	-0.01731	0.4988	0.498984	SiteClass[FBgn0264800|Mcr|SYNONYMOUS_CODING|0],TranscriptAnnot[SYNONYMOUS_CODING(LOW|SILENT|Ctg/Ttg|L1341|1760|Mcr|protein_coding|CODING|FBtr0079543|)]	(TF_binding_site|mE1_TFBS_sens|FBsf0000216729)
3L_4146737_SNP	T	C	T	0.2012	33	131	-0.07637	0.0002706	0.00026624	-0.1031	7.105e-06	3.52921e-06	-0.08974	1.469e-05	5.73823e-06	0.02674	0.0703	0.0647892	SiteClass[FBgn0052260|CG32260|DOWNSTREAM|771],TranscriptAnnot[DOWNSTREAM(MODIFIER||||395|CG32260|protein_coding|CODING|FBtr0332657|);DOWNSTREAM(MODIFIER||||575|CG32260|protein_coding|CODING|FBtr0073214|);INTERGENIC(MODIFIER|||||||||)]	(TF_binding_site|BDTNP1_TFBS_dl|FBsf0000305533),(TF_binding_site|BDTNP1_TFBS_Med|FBsf0000282137),(TF_binding_site|mE1_TFBS_HSA|FBsf0000362031)
3L_10900158_SNP	C	A	C	0.2606	43	122	-0.0882	7.585e-06	1.22831e-05	-0.1021	2.339e-06	4.85861e-06	-0.09516	1.152e-06	3.53619e-06	0.01392	0.3002	0.29282	SiteClass[|||],TranscriptAnnot[INTERGENIC(MODIFIER|||||||||)]	-
2R_10238592_SNP	T	C	C	0.09317	15	146	-0.01854	0.547	0.600673	-0.1096	0.0009876	0.0018601	-0.06405	0.03561	0.0509085	0.09101	4.329e-06	3.55119e-06	SiteClass[FBgn0085408|Shroom|SYNONYMOUS_CODING|0],TranscriptAnnot[SYNONYMOUS_CODING(LOW|SILENT|ggC/ggT|G1462|1576|Shroom|protein_coding|CODING|FBtr0112614|);SYNONYMOUS_CODING(LOW|SILENT|ggC/ggT|G555|669|Shroom|protein_coding|CODING|FBtr0112616|);SYNONYMOUS_CODING(LOW|SILENT|ggC/ggT|G555|669|Shroom|protein_coding|CODING|FBtr0290253|)]	(TF_binding_site|mE1_TFBS_cad|FBsf0000246639)
X_18329330_INS	GAGCCGGG	G	G	0.2062	33	127	-0.0995	4.648e-06	3.5574e-06	-0.09057	0.0001693	0.000129466	-0.09504	1.167e-05	9.89706e-06	-0.008928	0.5505	0.540606	SiteClass[FBgn0052548|CG32548|DOWNSTREAM|417],TranscriptAnnot[DOWNSTREAM(MODIFIER||||354|CG32548|protein_coding|CODING|FBtr0074569|);DOWNSTREAM(MODIFIER||||385|CG32548|protein_coding|CODING|FBtr0074568|);INTERGENIC(MODIFIER|||||||||)]	-
2R_7886539_SNP	A	G	G	0.06061	10	155	-0.1626	5.089e-06	3.57031e-06	-0.1314	0.0009536	0.00117976	-0.147	3.787e-05	3.67761e-05	-0.03119	0.2081	0.199635	SiteClass[|||],TranscriptAnnot[INTERGENIC(MODIFIER|||||||||)]	-
2L_13944434_SNP	G	A	A	0.3032	47	108	0.02113	0.2761	0.285109	-0.03748	0.07456	0.0462244	-0.008176	0.6703	0.519177	0.05862	3.869e-06	3.60976e-06	SiteClass[FBgn0032536|Ance-3|INTRON|0;FBgn0028544|CG16884|DOWNSTREAM|318],TranscriptAnnot[DOWNSTREAM(MODIFIER||||277|CG16884|protein_coding|CODING|FBtr0080557|);INTRON(MODIFIER||||844|Ance-3|protein_coding|CODING|FBtr0100327|7)]	-
3L_4146747_SNP	A	G	A	0.1988	33	133	-0.07363	0.0007367	0.00042685	-0.1028	9.726e-06	3.61297e-06	-0.0882	3.791e-05	7.73265e-06	0.02915	0.03831	0.0435986	SiteClass[FBgn0052260|CG32260|DOWNSTREAM|781],TranscriptAnnot[DOWNSTREAM(MODIFIER||||395|CG32260|protein_coding|CODING|FBtr0332657|);DOWNSTREAM(MODIFIER||||575|CG32260|protein_coding|CODING|FBtr0073214|);INTERGENIC(MODIFIER|||||||||)]	(TF_binding_site|BDTNP1_TFBS_dl|FBsf0000305533),(TF_binding_site|BDTNP1_TFBS_Med|FBsf0000282137),(TF_binding_site|mE1_TFBS_HSA|FBsf0000362031)
3L_5363828_SNP	A	G	G	0.303	50	115	-0.08604	4.42e-06	3.61356e-06	-0.0697	0.0008422	0.00102866	-0.07787	3.342e-05	4.52841e-05	-0.01634	0.2036	0.195591	SiteClass[|||],TranscriptAnnot[INTERGENIC(MODIFIER|||||||||)]	-
3R_8986217_SNP	T	G	G	0.4474	68	84	-0.07508	6.904e-05	1.94345e-05	-0.08413	3.639e-05	1.33671e-05	-0.0796	1.87e-05	3.62734e-06	0.009049	0.4717	0.457485	SiteClass[FBgn0038118|timeout|INTRON|0],TranscriptAnnot[INTRON(MODIFIER||||1384|timeout|protein_coding|CODING|FBtr0082712|14)]	-
X_10946165_SNP	G	A	A	0.05357	9	159	-0.005935	0.8789	0.826331	-0.1208	0.004292	0.00326514	-0.06337	0.1014	0.0870643	0.1149	4.607e-06	3.66103e-06	SiteClass[FBgn0030258|CG1552|DOWNSTREAM|204],TranscriptAnnot[DOWNSTREAM(MODIFIER||||171|CG1552|protein_coding|CODING|FBtr0073397|);DOWNSTREAM(MODIFIER||||184|CG1552|protein_coding|CODING|FBtr0073396|);INTERGENIC(MODIFIER|||||||||)]	-
X_11563993_SNP	C	A	A	0.06667	11	154	-0.1263	0.0002741	5.14763e-05	-0.1292	0.0007767	2.36784e-05	-0.1277	0.0002265	3.69174e-06	0.002842	0.9047	0.902993	SiteClass[FBgn0004370|Ptp10D|INTRON|0],TranscriptAnnot[INTRON(MODIFIER||||1558|Ptp10D|protein_coding|CODING|FBtr0273235|7);INTRON(MODIFIER||||1558|Ptp10D|protein_coding|CODING|FBtr0331406|8);INTRON(MODIFIER||||1631|Ptp10D|protein_coding|CODING|FBtr0073522|7);INTRON(MODIFIER||||1653|Ptp10D|protein_coding|CODING|FBtr0330394|8);INTRON(MODIFIER||||1990|Ptp10D|protein_coding|CODING|FBtr0330392|7);INTR…	-
2L_17846106_SNP	A	G	G	0.08284	14	155	-0.143	3.125e-06	3.72819e-06	-0.09309	0.006889	0.0163474	-0.118	0.000134	0.000286469	-0.04991	0.01655	0.0157604	SiteClass[FBgn0262018|CadN2|INTRON|0],TranscriptAnnot[INTRON(MODIFIER||||1799|CadN2|protein_coding|CODING|FBtr0308770|2)]	-
3R_6462840_SNP	T	G	G	0.08642	14	148	-0.1049	0.0008813	0.000650786	-0.1498	9.998e-06	3.75531e-06	-0.1274	4.025e-05	1.11812e-05	0.04495	0.03248	0.0302676	SiteClass[FBgn0001235|hth|INTRON|0],TranscriptAnnot[INTRON(MODIFIER||||266|hth|protein_coding|CODING|FBtr0100454|1)]	-
X_21262145_SNP	A	T	A	0.4424	73	92	-0.07134	4.256e-05	6.34938e-06	-0.06811	0.0004431	8.08764e-05	-0.06973	6.543e-05	3.79162e-06	-0.003229	0.7843	0.782712	SiteClass[FBgn0020272|mst|DOWNSTREAM|135],TranscriptAnnot[DOWNSTREAM(MODIFIER||||574|mst|protein_coding|CODING|FBtr0077211|);INTERGENIC(MODIFIER|||||||||)]	-
3R_5643398_SNP	G	A	A	0.103	17	148	-0.1146	6.439e-05	5.27998e-05	-0.1321	2.481e-05	1.05663e-05	-0.1234	1.452e-05	3.81034e-06	0.01748	0.3635	0.360329	SiteClass[FBgn0037764|CG9459|SYNONYMOUS_CODING|0;FBgn0037763|CG16904|UPSTREAM|697],TranscriptAnnot[SYNONYMOUS_CODING(LOW|SILENT|ttT/ttC|F208|265|CG9459|protein_coding|CODING|FBtr0082153|);UPSTREAM(MODIFIER||||262|CG16904|protein_coding|CODING|FBtr0082154|)]	-
2R_15063498_SNP	T	A	T	0.06098	10	154	-0.1516	3.077e-05	1.54124e-05	-0.1737	1.067e-05	1.01118e-05	-0.1626	5.857e-06	3.81405e-06	0.02211	0.3686	0.363934	SiteClass[FBgn0034420|CG10737|INTRON|0],TranscriptAnnot[INTRON(MODIFIER||||812|CG10737|protein_coding|CODING|FBtr0290311|10);INTRON(MODIFIER||||870|CG10737|protein_coding|CODING|FBtr0086586|12);INTRON(MODIFIER||||870|CG10737|protein_coding|CODING|FBtr0290313|12);INTRON(MODIFIER||||893|CG10737|protein_coding|CODING|FBtr0290314|12);INTRON(MODIFIER||||895|CG10737|protein_coding|CODING|FBtr0290315|12…	-
2L_15547615_SNP	A	G	G	0.05952	10	158	-0.001485	0.9681	0.943088	-0.1106	0.006098	0.0136721	-0.05604	0.1285	0.202538	0.1091	4.803e-06	3.82101e-06	SiteClass[FBgn0259922|Skadu|INTRON|0],TranscriptAnnot[INTRON(MODIFIER||||133|Skadu|protein_coding|CODING|FBtr0300217|1)]	-
3L_6864648_SNP	C	A	C	0.2061	34	131	-0.05369	0.01386	0.0124002	-0.1095	2.681e-06	3.84407e-06	-0.08161	0.0001402	0.000160822	0.05585	9.258e-05	7.04724e-05	SiteClass[|||],TranscriptAnnot[INTERGENIC(MODIFIER|||||||||)]	(TF_binding_site|mE1_TFBS_chinmo|FBsf0000209884),(TF_binding_site|mE1_TFBS_HSA|FBsf0000362802)
2L_6335422_SNP	A	G	G	0.06748	11	152	-0.156	3.721e-06	3.88214e-06	-0.1223	0.001381	0.00111622	-0.1392	4.406e-05	3.11836e-05	-0.0337	0.1534	0.147306	SiteClass[FBgn0031799|Pez|SYNONYMOUS_CODING|0],TranscriptAnnot[SYNONYMOUS_CODING(LOW|SILENT|ttC/ttT|F645|1252|Pez|protein_coding|CODING|FBtr0079284|);SYNONYMOUS_CODING(LOW|SILENT|ttC/ttT|F645|1252|Pez|protein_coding|CODING|FBtr0331226|)]	(TF_binding_site|mE1_TFBS_cad|FBsf0000241510),(TF_binding_site|mE1_TFBS_chinmo|FBsf0000207348)
X_16293171_SNP	A	G	G	0.2364	39	126	-0.07395	0.0003262	0.00013379	-0.09383	2.63e-05	3.88745e-06	-0.08389	3.673e-05	7.38173e-06	0.01989	0.15	0.145133	SiteClass[FBgn0004367|mei-41|SYNONYMOUS_CODING|0;FBgn0030746|CG9981|DOWNSTREAM|644],TranscriptAnnot[DOWNSTREAM(MODIFIER||||1060|CG9981|protein_coding|CODING|FBtr0074304|);DOWNSTREAM(MODIFIER||||1060|CG9981|protein_coding|CODING|FBtr0334043|);DOWNSTREAM(MODIFIER||||1060|CG9981|protein_coding|CODING|FBtr0334044|);SYNONYMOUS_CODING(LOW|SILENT|ccG/ccA|P2396|2517|mei-41|protein_coding|CODING|FBtr00742…	(TF_binding_site|mE1_TFBS_chinmo|FBsf0000209013)
3R_9110548_SNP	A	T	T	0.2	31	124	-0.07099	0.002146	0.00188388	-0.1086	1.399e-05	3.89044e-06	-0.08982	8.388e-05	2.87315e-05	0.03765	0.01405	0.0112909	SiteClass[FBgn0038131|CG15888|DOWNSTREAM|120;FBgn0038130|CG8630|DOWNSTREAM|299],TranscriptAnnot[DOWNSTREAM(MODIFIER||||319|CG15888|protein_coding|CODING|FBtr0100257|);DOWNSTREAM(MODIFIER||||408|CG8630|protein_coding|CODING|FBtr0082737|);INTERGENIC(MODIFIER|||||||||)]	-
3R_6133080_SNP	C	T	T	0.3158	48	104	-0.0869	1.278e-05	8.19271e-06	-0.09406	1.422e-05	2.21435e-05	-0.09048	4.527e-06	3.96397e-06	0.007159	0.5882	0.582794	SiteClass[FBgn0262617|CG43143|SYNONYMOUS_CODING|0;FBgn0037807|CG6293|DOWNSTREAM|448],TranscriptAnnot[DOWNSTREAM(MODIFIER||||573|CG6293|protein_coding|CODING|FBtr0082240|);DOWNSTREAM(MODIFIER||||573|CG6293|protein_coding|CODING|FBtr0337051|);SYNONYMOUS_CODING(LOW|SILENT|agT/agC|S2517|2537|CG43143|protein_coding|CODING|FBtr0305355|);SYNONYMOUS_CODING(LOW|SILENT|agT/agC|S2536|2556|CG43143|protein_co…	(TF_binding_site|mE1_TFBS_cad|FBsf0000248050),(TF_binding_site|mE1_TFBS_chinmo|FBsf0000212448),(TF_binding_site|mE1_TFBS_HSA|FBsf0000370232),(TF_binding_site|mE1_TFBS_sens|FBsf0000231096)
X_19629742_SNP	C	T	C	0.2378	39	125	-0.06623	0.001402	0.000957616	-0.09653	1.796e-05	3.97878e-06	-0.08138	7.2e-05	1.38686e-05	0.0303	0.02869	0.0259095	SiteClass[FBgn0031065|CG14234|UTR_5_PRIME|0],TranscriptAnnot[UTR_5_PRIME(MODIFIER||||381|CG14234|protein_coding|CODING|FBtr0074790|1)]	(TF_binding_site|mE1_TFBS_cad|FBsf0000243741),(TF_binding_site|mE1_TFBS_HSA|FBsf0000349712),(TF_binding_site|mE1_TFBS_sens|FBsf0000221806)
3R_6347083_SNP	C	T	T	0.2566	39	113	-0.0899	2.323e-05	4.01326e-06	-0.05371	0.02212	0.0112038	-0.0718	0.0007246	0.000143242	-0.03619	0.01046	0.00841818	SiteClass[FBgn0001235|hth|INTRON|0],TranscriptAnnot[INTRON(MODIFIER||||218|hth|protein_coding|CODING|FBtr0301345|4);INTRON(MODIFIER||||458|hth|protein_coding|CODING|FBtr0301956|9);INTRON(MODIFIER||||472|hth|protein_coding|CODING|FBtr0082256|10);INTRON(MODIFIER||||487|hth|protein_coding|CODING|FBtr0082255|10)]	-
3R_11025745_INS	TGGTTTTCACTCTTACCTTATATT	T	T	0.0566	9	150	-0.1793	2.453e-06	4.0173e-06	-0.1805	1.121e-05	6.97548e-05	-0.1799	1.53e-06	9.0888e-06	0.001216	0.9625	0.962183	SiteClass[FBgn0260659|CG42542|INTRON|0],TranscriptAnnot[INTRON(MODIFIER||||323|CG42542|protein_coding|CODING|FBtr0301101|4);INTRON(MODIFIER||||323|CG42542|protein_coding|CODING|FBtr0301102|4);INTRON(MODIFIER||||323|CG42542|protein_coding|CODING|FBtr0302324|4);INTRON(MODIFIER||||503|CG42542|protein_coding|CODING|FBtr0301103|4);INTRON(MODIFIER||||503|CG42542|protein_coding|CODING|FBtr0301104|4);UPS…	-
3R_6134176_SNP	T	C	C	0.2697	41	111	-0.09475	4.688e-06	4.27182e-06	-0.09596	2.04e-05	4.2397e-05	-0.09535	3.267e-06	4.09206e-06	0.00121	0.9303	0.9294	SiteClass[FBgn0262617|CG43143|UTR_3_PRIME|0;FBgn0037807|CG6293|UTR_3_PRIME|0],TranscriptAnnot[UTR_3_PRIME(MODIFIER||||2537|CG43143|protein_coding|CODING|FBtr0305355|14);UTR_3_PRIME(MODIFIER||||2556|CG43143|protein_coding|CODING|FBtr0337050|15);UTR_3_PRIME(MODIFIER||||573|CG6293|protein_coding|CODING|FBtr0082240|4);UTR_3_PRIME(MODIFIER||||573|CG6293|protein_coding|CODING|FBtr0337051|4)]	-
X_12617186_SNP	T	G	G	0.08696	14	147	-0.1139	0.0001436	0.00013994	-0.1424	1.366e-05	4.50179e-06	-0.1281	1.479e-05	4.12431e-06	0.02845	0.1739	0.172211	SiteClass[FBgn0264678|CR43963|INTRON|0;FBgn0263865|Smr|INTRON|0],TranscriptAnnot[INTRON(MODIFIER||||3601|Smr|protein_coding|CODING|FBtr0333765|2);INTRON(MODIFIER||||3601|Smr|protein_coding|CODING|FBtr0333766|3);INTRON(MODIFIER||||3601|Smr|protein_coding|CODING|FBtr0333767|2);INTRON(MODIFIER||||3607|Smr|protein_coding|CODING|FBtr0333768|3);INTRON(MODIFIER|||||CR43963|ncRNA|NON_CODING|FBtr0333774|1…	(TF_binding_site|BDTNP1_TFBS_dl|FBsf0000318657)
3R_6399558_SNP	G	C	C	0.07927	13	151	-0.1381	1.568e-05	4.21901e-06	-0.07712	0.03345	0.00562983	-0.1076	0.0009134	5.74233e-05	-0.06097	0.004613	0.0042743	SiteClass[FBgn0001235|hth|INTRON|0],TranscriptAnnot[INTRON(MODIFIER||||458|hth|protein_coding|CODING|FBtr0301956|5);INTRON(MODIFIER||||472|hth|protein_coding|CODING|FBtr0082256|6);INTRON(MODIFIER||||487|hth|protein_coding|CODING|FBtr0082255|6)]	-
2L_18644589_INS	TTGAAAACAGATTTT	T	T	0.2222	34	119	-0.09112	2.382e-05	2.35316e-05	-0.0977	3.089e-05	7.61987e-06	-0.09441	9.287e-06	4.25692e-06	0.006581	0.6536	0.650507	SiteClass[FBgn0032694|MESR3|INTRON|0],TranscriptAnnot[INTRON(MODIFIER||||281|MESR3|protein_coding|CODING|FBtr0081073|2);INTRON(MODIFIER||||281|MESR3|protein_coding|CODING|FBtr0329972|1);INTRON(MODIFIER||||299|MESR3|protein_coding|CODING|FBtr0329971|2)]	-
2L_2828226_INS	CA	C	C	0.1538	24	132	-0.113	2.895e-06	4.34925e-06	-0.08287	0.00184	0.00499529	-0.09792	4.404e-05	0.000143958	-0.03011	0.07392	0.0680082	SiteClass[FBgn0031464|Duox|INTRON|0],TranscriptAnnot[INTRON(MODIFIER||||1537|Duox|protein_coding|CODING|FBtr0300382|1);INTRON(MODIFIER||||1537|Duox|protein_coding|CODING|FBtr0335133|1)]	-
3R_9068782_SNP	G	C	C	0.1731	27	129	-0.1076	4.83e-06	4.35727e-06	-0.1004	0.0001348	0.00033799	-0.104	1.163e-05	1.89734e-05	-0.00719	0.6426	0.649243	SiteClass[FBgn0000024|Ace|INTRON|0],TranscriptAnnot[INTRON(MODIFIER||||636|Ace|protein_coding|CODING|FBtr0335223|5);INTRON(MODIFIER||||649|Ace|protein_coding|CODING|FBtr0082780|5);INTRON(MODIFIER||||649|Ace|protein_coding|CODING|FBtr0300486|6)]	-
3L_4146851_SNP	A	G	A	0.1879	31	134	-0.08237	0.0002227	0.000109265	-0.1005	2.677e-05	6.26832e-06	-0.09146	3.383e-05	4.40566e-06	0.01818	0.1938	0.22122	SiteClass[FBgn0052260|CG32260|DOWNSTREAM|885],TranscriptAnnot[DOWNSTREAM(MODIFIER||||395|CG32260|protein_coding|CODING|FBtr0332657|);DOWNSTREAM(MODIFIER||||575|CG32260|protein_coding|CODING|FBtr0073214|);INTERGENIC(MODIFIER|||||||||)]	(TF_binding_site|BDTNP1_TFBS_Med|FBsf0000282137),(TF_binding_site|mE1_TFBS_HSA|FBsf0000362031)
2L_9368600_SNP	C	G	G	0.1863	30	131	-0.03576	0.1217	0.177995	-0.103	3.756e-05	0.000114256	-0.0694	0.002411	0.00683484	0.06728	7.441e-06	4.47945e-06	SiteClass[FBgn0085210|CG34181|DOWNSTREAM|166],TranscriptAnnot[DOWNSTREAM(MODIFIER||||203|CG34181|protein_coding|CODING|FBtr0112374|);INTERGENIC(MODIFIER|||||||||)]	-
3R_13135546_SNP	G	A	A	0.07229	12	154	-0.1494	6.916e-06	4.51322e-06	-0.1363	0.0002206	0.000144971	-0.1428	1.701e-05	9.3787e-06	-0.01305	0.5661	0.559713	SiteClass[|||],TranscriptAnnot[INTERGENIC(MODIFIER|||||||||)]	-
2L_13945862_SNP	A	G	G	0.1006	16	143	-0.004038	0.8939	0.96461	-0.09161	0.005091	0.00537523	-0.04782	0.1106	0.128349	0.08757	6.826e-06	4.54089e-06	SiteClass[FBgn0028544|CG16884|SYNONYMOUS_CODING|0;FBgn0032536|Ance-3|INTRON|0],TranscriptAnnot[INTRON(MODIFIER||||844|Ance-3|protein_coding|CODING|FBtr0100327|7);SYNONYMOUS_CODING(LOW|SILENT|ggC/ggT|G67|277|CG16884|protein_coding|CODING|FBtr0080557|)]	(TF_binding_site|mE1_TFBS_cad|FBsf0000242089)
3L_6879636_SNP	A	T	A	0.1697	28	137	-0.08833	0.0001483	0.000169129	-0.1223	1.191e-06	4.57362e-06	-0.1053	4.517e-06	1.47988e-05	0.03401	0.029	0.0270459	SiteClass[|||],TranscriptAnnot[INTERGENIC(MODIFIER|||||||||)]	-
2R_8069132_SNP	C	T	C	0.0679	11	151	-0.1535	6.631e-06	4.57469e-06	-0.1184	0.002021	0.0031126	-0.1359	7.266e-05	0.000139551	-0.03514	0.1398	0.130761	SiteClass[FBgn0033692|wash|SYNONYMOUS_CODING|0],TranscriptAnnot[SYNONYMOUS_CODING(LOW|SILENT|atC/atT|I309|499|wash|protein_coding|CODING|FBtr0087989|);SYNONYMOUS_CODING(LOW|SILENT|atC/atT|I309|499|wash|protein_coding|CODING|FBtr0339595|)]	(TF_binding_site|mE1_TFBS_cad|FBsf0000246426),(TF_binding_site|mE1_TFBS_chinmo|FBsf0000211131),(TF_binding_site|mE1_TFBS_HSA|FBsf0000355897)
3R_8947727_SNP	G	T	T	0.1241	18	127	-0.1266	1.265e-05	4.60617e-06	-0.1138	0.0003493	8.10527e-05	-0.1202	3.226e-05	4.58223e-06	-0.01276	0.5031	0.497554	SiteClass[FBgn0038118|timeout|INTRON|0;FBgn0260793|2mit|UTR_3_PRIME|0],TranscriptAnnot[INTRON(MODIFIER||||1384|timeout|protein_coding|CODING|FBtr0082712|11);UTR_3_PRIME(MODIFIER||||1141|2mit|protein_coding|CODING|FBtr0301436|4);UTR_3_PRIME(MODIFIER||||1155|2mit|protein_coding|CODING|FBtr0330143|4)]	-
X_2513884_SNP	G	A	A	0.05325	9	160	-0.1608	2.159e-05	3.71214e-05	-0.1977	1.708e-06	4.61976e-06	-0.1793	1.729e-06	6.7397e-06	0.03694	0.1507	0.147677	SiteClass[FBgn0040336|Seipin|UTR_5_PRIME|0;FBgn0040334|Tsp3A|UPSTREAM|113],TranscriptAnnot[UPSTREAM(MODIFIER||||304|Tsp3A|protein_coding|CODING|FBtr0070445|);UPSTREAM(MODIFIER||||304|Tsp3A|protein_coding|CODING|FBtr0307159|);UTR_5_PRIME(MODIFIER||||370|Seipin|protein_coding|CODING|FBtr0070442|1)]	(TF_binding_site|BDTNP1_TFBS_da|FBsf0000331475),(TF_binding_site|BDTNP1_TFBS_dl|FBsf0000316127),(TF_binding_site|BDTNP1_TFBS_twi|FBsf0000204920),(TF_binding_site|mE1_TFBS_cad|FBsf0000242766),(TF_binding_site|mE1_TFBS_disco|FBsf0000261246),(TF_binding_site|mE1_TFBS_h|FBsf0000257753),(TF_binding_site|mE1_TFBS_HSA|FBsf0000378618),(TF_binding_site|mE1_TFBS_sens|FBsf0000219325)
3L_15090392_SNP	T	G	G	0.3312	51	103	-0.07964	3.696e-05	1.97805e-05	-0.09763	4.142e-06	5.82902e-06	-0.08863	3.787e-06	4.6679e-06	0.01799	0.1724	0.158439	SiteClass[FBgn0027088|Aats-gly|SYNONYMOUS_CODING|0;FBgn0262707|CTPsyn|UPSTREAM|843],TranscriptAnnot[SYNONYMOUS_CODING(LOW|SILENT|tcG/tcT|S591|679|Aats-gly|protein_coding|CODING|FBtr0075632|);SYNONYMOUS_CODING(LOW|SILENT|tcG/tcT|S677|765|Aats-gly|protein_coding|CODING|FBtr0075633|);SYNONYMOUS_CODING(LOW|SILENT|tcG/tcT|S677|765|Aats-gly|protein_coding|CODING|FBtr0333934|);UPSTREAM(MODIFIER||||429|C…	(TF_binding_site|mE1_TFBS_chinmo|FBsf0000210256),(TF_binding_site|mE1_TFBS_HSA|FBsf0000365400)
2R_5436179_SNP	C	T	T	0.1097	17	138	-0.1282	8.463e-06	4.68161e-06	-0.1187	0.0001716	0.000137289	-0.1235	1.676e-05	1.11922e-05	-0.00954	0.6164	0.619255	SiteClass[FBgn0033421|CG1888|UPSTREAM|539],TranscriptAnnot[INTERGENIC(MODIFIER|||||||||);UPSTREAM(MODIFIER||||372|CG1888|protein_coding|CODING|FBtr0310031|);UPSTREAM(MODIFIER||||372|CG1888|protein_coding|CODING|FBtr0310033|)]	(TF_binding_site|BDTNP1_TFBS_da|FBsf0000323611),(TF_binding_site|BDTNP1_TFBS_dl|FBsf0000300897),(TF_binding_site|BDTNP1_TFBS_Med|FBsf0000279679),(TF_binding_site|BDTNP1_TFBS_twi|FBsf0000198857),(TF_binding_site|BDTNP1_TFBS_z|FBsf0000196435),(TF_binding_site|mE1_TFBS_HSA|FBsf0000354959),(TF_binding_site|mE1_TFBS_sens|FBsf0000227029),(TF_binding_site|mE1_TFBS_Trl|FBsf0000338196)
3L_16485936_SNP	G	T	T	0.09146	15	149	0.01151	0.7114	0.58336	-0.07834	0.02079	0.0396873	-0.03341	0.2805	0.425369	0.08986	6.57e-06	4.69623e-06	SiteClass[FBgn0263131|CG43373|UTR_3_PRIME|0;FBgn0053158|CG33158|INTRON|0;FBgn0260388|CG42514|SYNONYMOUS_CODING|0],TranscriptAnnot[INTRON(MODIFIER||||1033|CG33158|protein_coding|CODING|FBtr0075390|5);SYNONYMOUS_CODING(LOW|SILENT|gcA/gcC|A323|531|CG42514|protein_coding|CODING|FBtr0300657|);SYNONYMOUS_CODING(LOW|SILENT|gcA/gcC|A325|533|CG42514|protein_coding|CODING|FBtr0300655|);SYNONYMOUS_CODING(LO…	(TF_binding_site|BDTNP1_TFBS_dl|FBsf0000307981),(TF_binding_site|mE1_TFBS_sens|FBsf0000224796)
X_21259328_INS	A	ACTTCTTCCA	A	0.4026	62	92	-0.07547	4.894e-05	9.5784e-06	-0.07236	0.0004366	7.19755e-05	-0.07391	6.762e-05	4.69682e-06	-0.003113	0.8061	0.799775	SiteClass[FBgn0001565|Hlc|UPSTREAM|356;FBgn0020272|mst|UPSTREAM|657],TranscriptAnnot[INTERGENIC(MODIFIER|||||||||);UPSTREAM(MODIFIER||||560|Hlc|protein_coding|CODING|FBtr0077221|);UPSTREAM(MODIFIER||||574|mst|protein_coding|CODING|FBtr0077211|)]	-
3R_26823565_SNP	A	G	G	0.06061	10	155	-0.08837	0.01718	0.0141417	-0.1854	3.149e-06	4.70914e-06	-0.1369	0.0001773	0.000202037	0.097	6.094e-05	4.56164e-05	SiteClass[FBgn0004573|5-HT7|INTRON|0],TranscriptAnnot[INTRON(MODIFIER||||564|5-HT7|protein_coding|CODING|FBtr0085746|1);INTRON(MODIFIER||||564|5-HT7|protein_coding|CODING|FBtr0334508|1)]	-
3R_11047599_SNP	C	T	C	0.05988	10	157	-0.1051	0.004238	0.00777443	-0.1909	1.344e-06	4.72163e-06	-0.148	4.295e-05	0.000158849	0.08581	0.0003988	0.000332513	SiteClass[FBgn0038304|CG12241|SYNONYMOUS_CODING|0;FBgn0051155|Rpb7|DOWNSTREAM|374],TranscriptAnnot[DOWNSTREAM(MODIFIER||||173|Rpb7|protein_coding|CODING|FBtr0083137|);SYNONYMOUS_CODING(LOW|SILENT|cgC/cgT|R779|804|CG12241|protein_coding|CODING|FBtr0083051|)]	(TF_binding_site|mE1_TFBS_cad|FBsf0000248412)
3L_19011851_SNP	G	A	A	0.239	38	121	0.02679	0.2138	0.162313	-0.03483	0.1392	0.21577	-0.00402	0.8516	0.93627	0.06163	8.265e-06	4.79601e-06	SiteClass[FBgn0002945|nkd|INTRON|0],TranscriptAnnot[INTRON(MODIFIER||||553|nkd|protein_coding|CODING|FBtr0332649|1);INTRON(MODIFIER||||806|nkd|protein_coding|CODING|FBtr0332650|1);INTRON(MODIFIER||||928|nkd|protein_coding|CODING|FBtr0075039|1)]	-
2R_18234926_SNP	A	T	A	0.3648	58	101	-0.07655	2.133e-05	4.30372e-05	-0.09056	6.014e-06	4.84597e-06	-0.08355	3.307e-06	5.97766e-06	0.01401	0.2653	0.254181	SiteClass[FBgn0034720|Liprin-gamma|INTRON|0;FBgn0034721|CG11298|UPSTREAM|886],TranscriptAnnot[INTRON(MODIFIER||||1023|Liprin-gamma|protein_coding|CODING|FBtr0071846|2);INTRON(MODIFIER||||1023|Liprin-gamma|protein_coding|CODING|FBtr0071847|1);INTRON(MODIFIER||||852|Liprin-gamma|protein_coding|CODING|FBtr0113107|2);UPSTREAM(MODIFIER||||152|CG11298|protein_coding|CODING|FBtr0071819|)]	-
X_21538885_SNP	A	C	C	0.0559	9	152	-0.13	0.0008471	0.00120864	-0.2035	1.086e-06	4.8467e-06	-0.1668	1.295e-05	4.87395e-05	0.0735	0.004596	0.00369484	SiteClass[|||],TranscriptAnnot[INTERGENIC(MODIFIER|||||||||)]	(transposable_element|FlyBase|FBti0019707)
3L_16488254_SNP	G	A	A	0.3987	63	95	0.0126	0.4958	0.350054	-0.04119	0.04153	0.136331	-0.01429	0.437	0.82752	0.05379	1.017e-05	4.91731e-06	SiteClass[FBgn0263131|CG43373|INTRON|0;FBgn0053158|CG33158|INTRON|0;FBgn0260388|CG42514|INTRON|0],TranscriptAnnot[INTRON(MODIFIER||||1033|CG33158|protein_coding|CODING|FBtr0075390|5);INTRON(MODIFIER||||1240|CG43373|protein_coding|CODING|FBtr0307367|28);INTRON(MODIFIER||||533|CG42514|protein_coding|CODING|FBtr0300655|2);INTRON(MODIFIER||||533|CG42514|protein_coding|CODING|FBtr0300656|2);UTR_5_PRIM…	(TF_binding_site|BDTNP1_TFBS_dl|FBsf0000307983),(TF_binding_site|mE1_TFBS_HSA|FBsf0000365897),(TF_binding_site|mE1_TFBS_inv|FBsf0000236092),(TF_binding_site|mE1_TFBS_Trl|FBsf0000340120)
3R_9147234_SNP	A	G	A	0.4129	64	91	-0.08483	4.707e-06	4.91835e-06	-0.08014	7.598e-05	0.00028862	-0.08249	7.2e-06	3.28438e-05	-0.004689	0.7072	0.700407	SiteClass[|||],TranscriptAnnot[INTERGENIC(MODIFIER|||||||||)]	-
2L_6481844_SNP	C	A	A	0.239	38	121	-0.09233	6.403e-06	4.94769e-06	-0.08121	0.0003439	0.000309754	-0.08677	2.246e-05	1.81436e-05	-0.01112	0.4204	0.423177	SiteClass[FBgn0031820|DLP|INTRON|0],TranscriptAnnot[INTRON(MODIFIER||||1659|DLP|protein_coding|CODING|FBtr0079260|1)]	(TF_binding_site|BDTNP1_TFBS_dl|FBsf0000297050),(TF_binding_site|BDTNP1_TFBS_Med|FBsf0000277761),(TF_binding_site|BDTNP1_TFBS_prd|FBsf0000274877),(TF_binding_site|mE1_TFBS_Trl|FBsf0000337285),(TF_binding_site|mE1_TFBS_Ubx|FBsf0000261799)
2R_12766715_SNP	T	C	T	0.4847	79	84	0.07984	3.808e-06	4.95335e-06	0.07984	3.185e-05	5.39742e-05	0.07984	3.708e-06	9.16626e-06	7.39e-06	0.9995	0.999493	SiteClass[FBgn0025833|CG8910|INTRON|0],TranscriptAnnot[INTRON(MODIFIER||||608|CG8910|protein_coding|CODING|FBtr0087071|2)]	-
2L_4886350_SNP	G	A	A	0.05389	9	158	-0.1582	3.216e-05	1.95572e-05	-0.1837	1.05e-05	1.18835e-05	-0.171	5.933e-06	4.99849e-06	0.02552	0.3247	0.318268	SiteClass[FBgn0031643|CG3008|DOWNSTREAM|681],TranscriptAnnot[DOWNSTREAM(MODIFIER||||603|CG3008|protein_coding|CODING|FBtr0077389|);INTERGENIC(MODIFIER|||||||||)]	-
3L_6889012_SNP	T	C	C	0.2195	36	128	-0.07663	0.0002994	0.000230857	-0.107	3.384e-06	5.01723e-06	-0.09179	1.179e-05	1.28246e-05	0.03032	0.03311	0.0303058	SiteClass[|||],TranscriptAnnot[INTERGENIC(MODIFIER|||||||||)]	-
3L_2699591_SNP	T	C	C	0.1026	16	140	-0.001974	0.9474	0.917175	-0.08926	0.00739	0.0132694	-0.04562	0.13	0.218012	0.08729	8.176e-06	5.01908e-06	SiteClass[FBgn0264606|CG43955|INTRON|0],TranscriptAnnot[INTRON(MODIFIER||||1314|CG43955|protein_coding|CODING|FBtr0333632|1);INTRON(MODIFIER||||643|CG43955|protein_coding|CODING|FBtr0333630|1);INTRON(MODIFIER||||643|CG43955|protein_coding|CODING|FBtr0333631|1);INTRON(MODIFIER||||969|CG43955|protein_coding|CODING|FBtr0333629|1)]	-
2L_8106429_SNP	C	G	G	0.05521	9	154	0.0236	0.5431	0.527924	-0.08982	0.03425	0.0356246	-0.03311	0.3913	0.407599	0.1134	7.643e-06	5.02968e-06	SiteClass[FBgn0261822|Bsg|INTRON|0],TranscriptAnnot[INTRON(MODIFIER||||265|Bsg|protein_coding|CODING|FBtr0079566|3);INTRON(MODIFIER||||265|Bsg|protein_coding|CODING|FBtr0079567|3);INTRON(MODIFIER||||265|Bsg|protein_coding|CODING|FBtr0079568|3);INTRON(MODIFIER||||265|Bsg|protein_coding|CODING|FBtr0079569|3);INTRON(MODIFIER||||265|Bsg|protein_coding|CODING|FBtr0079570|3);INTRON(MODIFIER||||265|Bsg|…	-
3L_1847453_SNP	T	C	C	0.07317	12	152	-0.1467	3.412e-06	5.06098e-06	-0.1371	0.0001459	0.000123845	-0.1419	9.255e-06	9.72127e-06	-0.009605	0.6689	0.668032	SiteClass[|||],TranscriptAnnot[INTERGENIC(MODIFIER|||||||||)]	-
3L_10781452_SNP	G	A	G	0.3988	65	98	-0.07198	5.92e-05	2.28979e-05	-0.08718	9.145e-06	1.0432e-05	-0.07958	7.705e-06	5.07964e-06	0.0152	0.2127	0.202495	SiteClass[|||],TranscriptAnnot[INTERGENIC(MODIFIER|||||||||)]	(TF_binding_site|mE1_TFBS_HSA|FBsf0000364012),(TF_binding_site|mE1_TFBS_inv|FBsf0000235926)
X_8515377_SNP	A	G	G	0.2606	43	122	-0.07905	6.995e-05	6.97564e-05	-0.09457	1.358e-05	5.20222e-06	-0.08681	1.065e-05	5.60834e-06	0.01552	0.2483	0.240476	SiteClass[|||],TranscriptAnnot[INTERGENIC(MODIFIER|||||||||)]	(TF_binding_site|mE1_TFBS_GATAe|FBsf0000258957),(TF_binding_site|mE1_TFBS_HSA|FBsf0000380665)
3R_10514698_SNP	C	T	T	0.1091	18	147	-0.117	2.741e-05	2.31669e-05	-0.1352	9.087e-06	1.03154e-05	-0.1261	5.147e-06	5.21346e-06	0.01825	0.3306	0.32736	SiteClass[FBgn0265140|Meltrin|INTRON|0],TranscriptAnnot[INTRON(MODIFIER||||1407|Meltrin|protein_coding|CODING|FBtr0301498|1);INTRON(MODIFIER||||975|Meltrin|protein_coding|CODING|FBtr0301499|1)]	(TF_binding_site|BDTNP1_TFBS_twi|FBsf0000265014)
3L_9900510_SNP	A	C	C	0.1772	28	130	-0.09215	7.794e-05	2.41029e-05	-0.09498	0.0002377	3.53317e-05	-0.09357	5.879e-05	5.23895e-06	0.002828	0.8592	0.855851	SiteClass[FBgn0085385|CG34356|UPSTREAM|710],TranscriptAnnot[INTERGENIC(MODIFIER|||||||||);UPSTREAM(MODIFIER||||834|CG34356|protein_coding|CODING|FBtr0331577|);UPSTREAM(MODIFIER||||854|CG34356|protein_coding|CODING|FBtr0331579|)]	-
3L_7814982_SNP	T	C	C	0.07831	13	153	-0.1419	9.162e-06	7.95904e-06	-0.1532	1.382e-05	2.44858e-05	-0.1475	3.525e-06	5.24957e-06	0.01132	0.6059	0.599959	SiteClass[FBgn0016694|Pdp1|INTRON|0],TranscriptAnnot[INTRON(MODIFIER||||232|Pdp1|protein_coding|CODING|FBtr0300499|2);INTRON(MODIFIER||||250|Pdp1|protein_coding|CODING|FBtr0076775|1);INTRON(MODIFIER||||264|Pdp1|protein_coding|CODING|FBtr0332083|1);INTRON(MODIFIER||||270|Pdp1|protein_coding|CODING|FBtr0076776|1);INTRON(MODIFIER||||270|Pdp1|protein_coding|CODING|FBtr0306535|2);INTRON(MODIFIER||||27…	-
2R_16765149_SNP	A	G	G	0.06707	11	153	-0.1332	8.182e-05	5.75053e-05	-0.1468	0.000107	2.59198e-05	-0.14	3.638e-05	5.29843e-06	0.01354	0.5672	0.56129	SiteClass[FBgn0050295|Ipk1|NON_SYNONYMOUS_CODING|0],TranscriptAnnot[NON_SYNONYMOUS_CODING(MODERATE|MISSENSE|gGc/gAc|G396D|621|Ipk1|protein_coding|CODING|FBtr0071515|);NON_SYNONYMOUS_CODING(MODERATE|MISSENSE|gGc/gAc|G396D|715|Ipk1|protein_coding|CODING|FBtr0332465|);NON_SYNONYMOUS_CODING(MODERATE|MISSENSE|gGc/gAc|G396D|716|Ipk1|protein_coding|CODING|FBtr0113368|)]	-
3R_9069408_SNP	G	C	C	0.281	43	110	0.08618	2.914e-05	1.12291e-05	0.09446	2.622e-05	3.48556e-05	0.09032	9.426e-06	5.33322e-06	-0.008289	0.5546	0.537156	SiteClass[FBgn0000024|Ace|NON_SYNONYMOUS_CODING|0],TranscriptAnnot[NON_SYNONYMOUS_CODING(MODERATE|MISSENSE|gGc/gCc|G303A|636|Ace|protein_coding|CODING|FBtr0335223|);NON_SYNONYMOUS_CODING(MODERATE|MISSENSE|gGc/gCc|G303A|649|Ace|protein_coding|CODING|FBtr0082780|);NON_SYNONYMOUS_CODING(MODERATE|MISSENSE|gGc/gCc|G303A|649|Ace|protein_coding|CODING|FBtr0300486|)]	-
3R_17108691_INS	AG	A	A	0.2	32	128	-0.09025	5.474e-05	2.23909e-05	-0.09379	0.0001345	2.54309e-05	-0.09202	3.548e-05	5.35067e-06	0.003544	0.8139	0.810334	SiteClass[FBgn0038880|SIFR|INTRON|0;FBgn0038879|CG17298|UPSTREAM|227],TranscriptAnnot[INTRON(MODIFIER||||758|SIFR|protein_coding|CODING|FBtr0084098|4);INTRON(MODIFIER||||758|SIFR|protein_coding|CODING|FBtr0301815|4);UPSTREAM(MODIFIER||||95|CG17298|protein_coding|CODING|FBtr0084056|)]	-
3L_4146739_SNP	A	T	A	0.2	33	132	-0.07354	0.0007762	0.000432806	-0.1008	2.167e-05	5.38681e-06	-0.08718	5.473e-05	9.5679e-06	0.02729	0.06381	0.0592667	SiteClass[FBgn0052260|CG32260|DOWNSTREAM|773],TranscriptAnnot[DOWNSTREAM(MODIFIER||||395|CG32260|protein_coding|CODING|FBtr0332657|);DOWNSTREAM(MODIFIER||||575|CG32260|protein_coding|CODING|FBtr0073214|);INTERGENIC(MODIFIER|||||||||)]	(TF_binding_site|BDTNP1_TFBS_dl|FBsf0000305533),(TF_binding_site|BDTNP1_TFBS_Med|FBsf0000282137),(TF_binding_site|mE1_TFBS_HSA|FBsf0000362031)
3R_15217344_SNP	A	T	T	0.2375	38	122	-0.09623	3.953e-06	5.40545e-06	-0.08305	0.000284	0.000877911	-0.08964	1.565e-05	5.60909e-05	-0.01318	0.3443	0.341628	SiteClass[FBgn0038701|CG18493|INTRON|0;FBgn0086613|Ino80|INTRON|0],TranscriptAnnot[INTRON(MODIFIER||||1638|Ino80|protein_coding|CODING|FBtr0083771|8);INTRON(MODIFIER||||480|CG18493|protein_coding|CODING|FBtr0083756|4)]	(TF_binding_site|mE1_TFBS_sens|FBsf0000232506)
3L_4146762_SNP	T	C	T	0.1988	33	133	-0.07464	0.0005757	0.000368521	-0.1007	2.075e-05	5.51344e-06	-0.08765	4.493e-05	8.90299e-06	0.02602	0.07452	0.0719871	SiteClass[FBgn0052260|CG32260|DOWNSTREAM|796],TranscriptAnnot[DOWNSTREAM(MODIFIER||||395|CG32260|protein_coding|CODING|FBtr0332657|);DOWNSTREAM(MODIFIER||||575|CG32260|protein_coding|CODING|FBtr0073214|);INTERGENIC(MODIFIER|||||||||)]	(TF_binding_site|BDTNP1_TFBS_dl|FBsf0000305533),(TF_binding_site|BDTNP1_TFBS_Med|FBsf0000282137),(TF_binding_site|mE1_TFBS_HSA|FBsf0000362031)
3R_9125625_SNP	T	C	C	0.2357	37	120	-0.0901	2.471e-05	1.40583e-05	-0.1014	1.202e-05	1.82494e-05	-0.09573	5.811e-06	5.51514e-06	0.01125	0.4276	0.422791	SiteClass[FBgn0038136|CG8774|INTRON|0],TranscriptAnnot[INTRON(MODIFIER||||885|CG8774|protein_coding|CODING|FBtr0082740|4);INTRON(MODIFIER||||942|CG8774|protein_coding|CODING|FBtr0082741|3)]	-
3L_19144194_SNP	C	G	G	0.05844	9	145	-0.01698	0.6737	0.765456	-0.1301	0.002895	0.00244306	-0.07354	0.06625	0.0800855	0.1131	9.983e-06	5.56158e-06	SiteClass[FBgn0016797|fz2|INTRON|0],TranscriptAnnot[INTRON(MODIFIER||||694|fz2|protein_coding|CODING|FBtr0075028|2);INTRON(MODIFIER||||694|fz2|protein_coding|CODING|FBtr0112890|2);INTRON(MODIFIER||||694|fz2|protein_coding|CODING|FBtr0299586|6);INTRON(MODIFIER||||694|fz2|protein_coding|CODING|FBtr0330194|5);INTRON(MODIFIER||||694|fz2|protein_coding|CODING|FBtr0332735|2);INTRON(MODIFIER||||806|fz2|…	-
3L_4146782_SNP	G	A	G	0.1976	33	134	-0.07342	0.0007323	0.000438812	-0.1003	2.126e-05	5.56186e-06	-0.08687	5.243e-05	9.49907e-06	0.02691	0.0656	0.0624715	SiteClass[FBgn0052260|CG32260|DOWNSTREAM|816],TranscriptAnnot[DOWNSTREAM(MODIFIER||||395|CG32260|protein_coding|CODING|FBtr0332657|);DOWNSTREAM(MODIFIER||||575|CG32260|protein_coding|CODING|FBtr0073214|);INTERGENIC(MODIFIER|||||||||)]	(TF_binding_site|BDTNP1_TFBS_dl|FBsf0000305533),(TF_binding_site|BDTNP1_TFBS_Med|FBsf0000282137),(TF_binding_site|mE1_TFBS_HSA|FBsf0000362031)
3L_4146727_SNP	T	A	T	0.1976	33	134	-0.07335	0.0007397	0.000443534	-0.1004	2.098e-05	5.5646e-06	-0.08688	5.236e-05	9.94017e-06	0.02708	0.06397	0.0608693	SiteClass[FBgn0052260|CG32260|DOWNSTREAM|761],TranscriptAnnot[DOWNSTREAM(MODIFIER||||395|CG32260|protein_coding|CODING|FBtr0332657|);DOWNSTREAM(MODIFIER||||575|CG32260|protein_coding|CODING|FBtr0073214|);INTERGENIC(MODIFIER|||||||||)]	(TF_binding_site|BDTNP1_TFBS_dl|FBsf0000305533),(TF_binding_site|BDTNP1_TFBS_Med|FBsf0000282137),(TF_binding_site|mE1_TFBS_HSA|FBsf0000362031)
3L_4146729_DEL	TGA	T	TGA	0.1976	33	134	-0.07335	0.0007397	0.000443534	-0.1004	2.098e-05	5.5646e-06	-0.08688	5.236e-05	9.94017e-06	0.02708	0.06397	0.0608693	SiteClass[FBgn0052260|CG32260|DOWNSTREAM|764],TranscriptAnnot[DOWNSTREAM(MODIFIER||||395|CG32260|protein_coding|CODING|FBtr0332657|);DOWNSTREAM(MODIFIER||||575|CG32260|protein_coding|CODING|FBtr0073214|);INTERGENIC(MODIFIER|||||||||)]	(TF_binding_site|BDTNP1_TFBS_dl|FBsf0000305533),(TF_binding_site|BDTNP1_TFBS_Med|FBsf0000282137),(TF_binding_site|mE1_TFBS_HSA|FBsf0000362031)
3L_4146754_DEL	AA	A	AA	0.1976	33	134	-0.07335	0.0007397	0.000443534	-0.1004	2.098e-05	5.5646e-06	-0.08688	5.236e-05	9.94017e-06	0.02708	0.06397	0.0608693	SiteClass[FBgn0052260|CG32260|DOWNSTREAM|789],TranscriptAnnot[DOWNSTREAM(MODIFIER||||395|CG32260|protein_coding|CODING|FBtr0332657|);DOWNSTREAM(MODIFIER||||575|CG32260|protein_coding|CODING|FBtr0073214|);INTERGENIC(MODIFIER|||||||||)]	(TF_binding_site|BDTNP1_TFBS_dl|FBsf0000305533),(TF_binding_site|BDTNP1_TFBS_Med|FBsf0000282137),(TF_binding_site|mE1_TFBS_HSA|FBsf0000362031)
2R_5436335_INS	GG	G	G	0.1	16	144	-0.13	1.095e-05	5.57618e-06	-0.1208	0.0002213	0.000119204	-0.1254	2.216e-05	1.03865e-05	-0.00917	0.6431	0.641318	SiteClass[FBgn0033421|CG1888|UPSTREAM|696],TranscriptAnnot[INTERGENIC(MODIFIER|||||||||);UPSTREAM(MODIFIER||||372|CG1888|protein_coding|CODING|FBtr0310031|);UPSTREAM(MODIFIER||||372|CG1888|protein_coding|CODING|FBtr0310033|)]	(TF_binding_site|BDTNP1_TFBS_da|FBsf0000323611),(TF_binding_site|BDTNP1_TFBS_dl|FBsf0000300898),(TF_binding_site|BDTNP1_TFBS_Med|FBsf0000279679),(TF_binding_site|BDTNP1_TFBS_twi|FBsf0000198857),(TF_binding_site|BDTNP1_TFBS_z|FBsf0000196435),(TF_binding_site|mE1_TFBS_HSA|FBsf0000354959),(TF_binding_site|mE1_TFBS_Trl|FBsf0000338196)
3L_18253962_SNP	T	A	A	0.09756	16	148	-0.0242	0.424	0.392576	-0.1108	0.0006996	0.000217785	-0.06752	0.02424	0.00925218	0.08664	8.635e-06	5.58895e-06	SiteClass[|||],TranscriptAnnot[INTERGENIC(MODIFIER|||||||||)]	(TF_binding_site|BDTNP1_TFBS_hb|FBsf0000291539),(TF_binding_site|mE1_TFBS_HSA|FBsf0000366490)
X_21310533_SNP	G	T	T	0.05917	10	159	-0.1599	8.612e-06	5.59557e-06	-0.1171	0.003546	0.00117299	-0.1385	0.0001248	2.14277e-05	-0.04274	0.08021	0.0779797	SiteClass[FBgn0259245|CG42343|INTRON|0],TranscriptAnnot[INTRON(MODIFIER||||555|CG42343|protein_coding|CODING|FBtr0299898|3);INTRON(MODIFIER||||555|CG42343|protein_coding|CODING|FBtr0299901|3)]	(TF_binding_site|BDTNP1_TFBS_dl|FBsf0000320777)
2L_17226689_DEL	T	TC	TC	0.1	15	135	0.00826	0.7809	0.731664	-0.08133	0.01219	0.0175643	-0.03654	0.214	0.265051	0.08959	1.004e-05	5.60569e-06	SiteClass[FBgn0032629|beat-IIIc|INTRON|0],TranscriptAnnot[INTRON(MODIFIER||||361|beat-IIIc|protein_coding|CODING|FBtr0080972|2);INTRON(MODIFIER||||383|beat-IIIc|protein_coding|CODING|FBtr0080971|2)]	-
2R_7450450_DEL	A	ACA	ACA	0.09615	15	141	-0.1238	3.582e-05	1.91403e-05	-0.1198	0.0003567	5.12654e-05	-0.1218	4.963e-05	5.61229e-06	-0.003995	0.8491	0.843902	SiteClass[|||],TranscriptAnnot[INTERGENIC(MODIFIER|||||||||)]	-
3L_4146763_SNP	A	T	A	0.1976	33	134	-0.07337	0.0007374	0.000444842	-0.1003	2.132e-05	5.6288e-06	-0.08684	5.271e-05	9.99846e-06	0.02694	0.06531	0.062176	SiteClass[FBgn0052260|CG32260|DOWNSTREAM|797],TranscriptAnnot[DOWNSTREAM(MODIFIER||||395|CG32260|protein_coding|CODING|FBtr0332657|);DOWNSTREAM(MODIFIER||||575|CG32260|protein_coding|CODING|FBtr0073214|);INTERGENIC(MODIFIER|||||||||)]	(TF_binding_site|BDTNP1_TFBS_dl|FBsf0000305533),(TF_binding_site|BDTNP1_TFBS_Med|FBsf0000282137),(TF_binding_site|mE1_TFBS_HSA|FBsf0000362031)
3R_9216127_SNP	A	C	C	0.2829	43	109	-0.09117	9.05e-06	5.67683e-06	-0.07143	0.001178	0.00444948	-0.0813	6.432e-05	0.00014998	-0.01975	0.1161	0.140974	SiteClass[FBgn0038147|CCHa2|INTRON|0],TranscriptAnnot[INTRON(MODIFIER||||136|CCHa2|protein_coding|CODING|FBtr0082762|2);INTRON(MODIFIER||||136|CCHa2|protein_coding|CODING|FBtr0303262|2);INTRON(MODIFIER||||136|CCHa2|protein_coding|CODING|FBtr0303263|2)]	-
2R_19688759_SNP	A	G	G	0.103	17	148	-0.07234	0.01193	0.012688	-0.1404	6.354e-06	5.69183e-06	-0.1064	0.0001798	0.000195157	0.06804	0.0003705	0.00028838	SiteClass[FBgn0050177|CG30177|UPSTREAM|306],TranscriptAnnot[INTERGENIC(MODIFIER|||||||||);UPSTREAM(MODIFIER||||206|CG30177|protein_coding|CODING|FBtr0072122|)]	-
3L_6879637_SNP	T	A	T	0.1687	28	138	-0.0875	0.0001624	0.000197199	-0.1212	1.452e-06	5.72484e-06	-0.1043	5.276e-06	1.81593e-05	0.03369	0.03026	0.0284778	SiteClass[|||],TranscriptAnnot[INTERGENIC(MODIFIER|||||||||)]	-
3L_15039691_SNP	T	C	T	0.122	20	144	-0.1193	6.317e-06	5.7287e-06	-0.08647	0.003444	0.00398476	-0.1029	0.0001053	0.000134514	-0.03288	0.06966	0.0638513	SiteClass[FBgn0261090|Sytbeta|INTRON|0],TranscriptAnnot[INTRON(MODIFIER||||546|Sytbeta|protein_coding|CODING|FBtr0299848|2)]	(regulatory_region|REDfly_CRMs|FBsf0000436079),(TF_binding_site|BDTNP1_TFBS_dl|FBsf0000307606)
3L_19011855_SNP	T	G	G	0.2357	37	120	0.02627	0.2299	0.175759	-0.03554	0.1375	0.217359	-0.004635	0.8318	0.946169	0.06181	1.131e-05	5.79774e-06	SiteClass[FBgn0002945|nkd|INTRON|0],TranscriptAnnot[INTRON(MODIFIER||||553|nkd|protein_coding|CODING|FBtr0332649|1);INTRON(MODIFIER||||806|nkd|protein_coding|CODING|FBtr0332650|1);INTRON(MODIFIER||||928|nkd|protein_coding|CODING|FBtr0075039|1)]	-
3R_9031455_INS	CTACGG	C	C	0.1793	26	119	-0.111	1.015e-05	5.82584e-06	-0.1176	9.929e-06	2.97741e-05	-0.1143	3.468e-06	7.34306e-06	0.006678	0.6756	0.679626	SiteClass[|||],TranscriptAnnot[INTERGENIC(MODIFIER|||||||||)]	-
3L_4146771_SNP	A	C	A	0.1988	33	133	-0.07314	0.0007992	0.000473019	-0.1003	2.292e-05	5.85449e-06	-0.08673	5.741e-05	1.07055e-05	0.02718	0.0639	0.0600315	SiteClass[FBgn0052260|CG32260|DOWNSTREAM|805],TranscriptAnnot[DOWNSTREAM(MODIFIER||||395|CG32260|protein_coding|CODING|FBtr0332657|);DOWNSTREAM(MODIFIER||||575|CG32260|protein_coding|CODING|FBtr0073214|);INTERGENIC(MODIFIER|||||||||)]	(TF_binding_site|BDTNP1_TFBS_dl|FBsf0000305533),(TF_binding_site|BDTNP1_TFBS_Med|FBsf0000282137),(TF_binding_site|mE1_TFBS_HSA|FBsf0000362031)
3L_4146743_SNP	T	C	T	0.2	33	132	-0.07348	0.0007917	0.000437199	-0.1003	2.456e-05	5.88185e-06	-0.08689	5.925e-05	1.01258e-05	0.02682	0.06847	0.0637703	SiteClass[FBgn0052260|CG32260|DOWNSTREAM|777],TranscriptAnnot[DOWNSTREAM(MODIFIER||||395|CG32260|protein_coding|CODING|FBtr0332657|);DOWNSTREAM(MODIFIER||||575|CG32260|protein_coding|CODING|FBtr0073214|);INTERGENIC(MODIFIER|||||||||)]	(TF_binding_site|BDTNP1_TFBS_dl|FBsf0000305533),(TF_binding_site|BDTNP1_TFBS_Med|FBsf0000282137),(TF_binding_site|mE1_TFBS_HSA|FBsf0000362031)
3R_12145518_SNP	T	G	T	0.4295	67	89	-0.08262	6.868e-06	5.88471e-06	-0.08012	5.923e-05	0.000174167	-0.08137	7.539e-06	1.93926e-05	-0.002496	0.8385	0.836342	SiteClass[FBgn0040271|Sulf1|INTRON|0],TranscriptAnnot[INTRON(MODIFIER||||1114|Sulf1|protein_coding|CODING|FBtr0083273|2);INTRON(MODIFIER||||1114|Sulf1|protein_coding|CODING|FBtr0334699|3);INTRON(MODIFIER||||1114|Sulf1|protein_coding|CODING|FBtr0334700|2)]	-
3R_9087510_SNP	C	T	C	0.4797	71	77	0.08086	1.534e-05	7.31701e-06	0.07807	0.0001424	0.000107802	0.07947	1.837e-05	6.10221e-06	0.002793	0.828	0.82022	SiteClass[FBgn0040551|CG11686|INTRON|0;FBgn0038128|Ravus|DOWNSTREAM|944],TranscriptAnnot[DOWNSTREAM(MODIFIER||||359|Ravus|protein_coding|CODING|FBtr0082779|);INTRON(MODIFIER||||70|CG11686|protein_coding|CODING|FBtr0082735|2);INTRON(MODIFIER||||70|CG11686|protein_coding|CODING|FBtr0335222|2)]	-
3R_13358302_SNP	A	G	A	0.1635	26	133	-0.1101	1.242e-06	6.16299e-06	-0.1052	3.414e-05	0.000351895	-0.1076	2.057e-06	2.83225e-05	-0.004936	0.761	0.757994	SiteClass[FBgn0038515|CG5823|UTR_3_PRIME|0],TranscriptAnnot[UTR_3_PRIME(MODIFIER||||283|CG5823|protein_coding|CODING|FBtr0083505|4);UTR_3_PRIME(MODIFIER||||283|CG5823|protein_coding|CODING|FBtr0321266|5)]	-
2R_2375198_SNP	G	A	A	0.07285	11	140	-0.1245	0.0004436	0.000524572	-0.1802	3.601e-06	6.16653e-06	-0.1524	1.538e-05	3.00231e-05	0.05573	0.01962	0.0162881	SiteClass[|||],TranscriptAnnot[INTERGENIC(MODIFIER|||||||||)]	-
2L_15265629_SNP	C	G	G	0.06667	11	154	-0.01942	0.5695	0.717511	-0.1217	0.001123	0.00646528	-0.07054	0.03763	0.11516	0.1022	6.602e-06	6.24889e-06	SiteClass[FBgn0261268|Cul-3|DOWNSTREAM|400;FBgn0045842|yuri|UPSTREAM|660],TranscriptAnnot[DOWNSTREAM(MODIFIER||||773|Cul-3|protein_coding|CODING|FBtr0302157|);DOWNSTREAM(MODIFIER||||773|Cul-3|protein_coding|CODING|FBtr0302158|);DOWNSTREAM(MODIFIER||||934|Cul-3|protein_coding|CODING|FBtr0302159|);UPSTREAM(MODIFIER||||564|yuri|protein_coding|CODING|FBtr0080712|);UPSTREAM(MODIFIER||||578|yuri|protei…	(TF_binding_site|mE1_TFBS_HSA|FBsf0000351330)
3L_3264724_SNP	T	C	C	0.05389	9	158	-0.1297	0.000719	0.000534374	-0.1705	4.648e-05	6.3078e-06	-0.1501	7.837e-05	1.08773e-05	0.04077	0.1148	0.109994	SiteClass[FBgn0035427|ckd|INTRON|0],TranscriptAnnot[INTRON(MODIFIER||||140|ckd|protein_coding|CODING|FBtr0073050|1);INTRON(MODIFIER||||140|ckd|protein_coding|CODING|FBtr0331457|1);INTRON(MODIFIER||||140|ckd|protein_coding|CODING|FBtr0331458|2)]	-
2R_5355152_SNP	T	G	G	0.07285	11	140	0.01481	0.6847	0.553843	-0.08772	0.03033	0.0422605	-0.03646	0.32	0.454854	0.1025	1.605e-05	6.32924e-06	SiteClass[FBgn0259234|Camta|INTRON|0],TranscriptAnnot[INTRON(MODIFIER||||1675|Camta|protein_coding|CODING|FBtr0339381|2);INTRON(MODIFIER||||1842|Camta|protein_coding|CODING|FBtr0299847|2);INTRON(MODIFIER||||1881|Camta|protein_coding|CODING|FBtr0299846|2);INTRON(MODIFIER||||1988|Camta|protein_coding|CODING|FBtr0339382|4);INTRON(MODIFIER||||2004|Camta|protein_coding|CODING|FBtr0301766|4);INTRON(MOD…	-
3L_1134677_SNP	T	G	G	0.06667	11	154	-0.1556	6.51e-06	6.38428e-06	-0.1291	0.0008297	0.00125925	-0.1424	4.038e-05	6.74232e-05	-0.02642	0.2626	0.256306	SiteClass[|||],TranscriptAnnot[INTERGENIC(MODIFIER|||||||||)]	(regulatory_region|REDfly_CRMs|FBsf0000436478)
X_11614930_SNP	C	T	C	0.1131	19	149	-0.1044	0.0001172	7.52415e-05	-0.1246	2.696e-05	1.48735e-05	-0.1145	2.074e-05	6.41304e-06	0.02016	0.2721	0.267169	SiteClass[FBgn0030330|Tango10|NON_SYNONYMOUS_CODING|0],TranscriptAnnot[NON_SYNONYMOUS_CODING(MODERATE|MISSENSE|gCc/gTc|A79V|587|Tango10|protein_coding|CODING|FBtr0073552|);NON_SYNONYMOUS_CODING(MODERATE|MISSENSE|gCc/gTc|A79V|587|Tango10|protein_coding|CODING|FBtr0073553|);NON_SYNONYMOUS_CODING(MODERATE|MISSENSE|gCc/gTc|A79V|587|Tango10|protein_coding|CODING|FBtr0332955|)]	(TF_binding_site|BDTNP1_TFBS_dl|FBsf0000318449),(TF_binding_site|BDTNP1_TFBS_sna|FBsf0000270208),(TF_binding_site|BDTNP1_TFBS_twi|FBsf0000205756),(TF_binding_site|mE1_TFBS_cad|FBsf0000243274),(TF_binding_site|mE1_TFBS_HSA|FBsf0000381602)
2L_13940211_SNP	T	C	C	0.06707	11	153	0.01361	0.6968	0.656826	-0.08851	0.02035	0.0343864	-0.03745	0.2804	0.355233	0.1021	9.966e-06	6.47261e-06	SiteClass[FBgn0032536|Ance-3|INTRON|0],TranscriptAnnot[INTRON(MODIFIER||||844|Ance-3|protein_coding|CODING|FBtr0100327|7)]	-
2L_1235068_SNP	T	C	C	0.1677	27	134	-0.09588	4.939e-05	6.48449e-06	-0.07676	0.002517	0.000925454	-0.08632	0.0002153	3.55734e-05	-0.01912	0.2079	0.224051	SiteClass[|||],TranscriptAnnot[INTERGENIC(MODIFIER|||||||||)]	-
3L_4146750_SNP	G	A	G	0.2	33	132	-0.07468	0.0005619	0.000369835	-0.1003	2.35e-05	6.52674e-06	-0.0875	4.77e-05	9.77737e-06	0.02565	0.07756	0.0764047	SiteClass[FBgn0052260|CG32260|DOWNSTREAM|784],TranscriptAnnot[DOWNSTREAM(MODIFIER||||395|CG32260|protein_coding|CODING|FBtr0332657|);DOWNSTREAM(MODIFIER||||575|CG32260|protein_coding|CODING|FBtr0073214|);INTERGENIC(MODIFIER|||||||||)]	(TF_binding_site|BDTNP1_TFBS_dl|FBsf0000305533),(TF_binding_site|BDTNP1_TFBS_Med|FBsf0000282137),(TF_binding_site|mE1_TFBS_HSA|FBsf0000362031)
2R_8169319_SNP	T	A	A	0.05357	9	159	-0.1039	0.006988	0.00736272	-0.1856	7.984e-06	6.53423e-06	-0.1448	0.0001391	0.000165969	0.08168	0.001343	0.00119469	SiteClass[FBgn0261611|CG42700|INTRON|0],TranscriptAnnot[INTRON(MODIFIER||||370|CG42700|protein_coding|CODING|FBtr0302922|1)]	-
X_16292676_SNP	C	T	T	0.3537	58	106	-0.01118	0.5474	0.539914	-0.06457	0.001402	0.00155588	-0.03788	0.04009	0.0493693	0.05339	1.021e-05	6.58321e-06	SiteClass[FBgn0004367|mei-41|SYNONYMOUS_CODING|0],TranscriptAnnot[SYNONYMOUS_CODING(LOW|SILENT|ggT/ggC|G2231|2517|mei-41|protein_coding|CODING|FBtr0074271|)]	(TF_binding_site|mE1_TFBS_chinmo|FBsf0000209013)
2L_17831060_SNP	A	G	G	0.07273	12	153	-0.1499	5.437e-06	6.60563e-06	-0.1138	0.00189	0.00544406	-0.1319	7.133e-05	0.000156916	-0.03611	0.08836	0.105557	SiteClass[FBgn0262018|CadN2|INTRON|0],TranscriptAnnot[INTRON(MODIFIER||||1799|CadN2|protein_coding|CODING|FBtr0303836|1);INTRON(MODIFIER||||1799|CadN2|protein_coding|CODING|FBtr0308770|2)]	(TF_binding_site|BDTNP1_TFBS_twi|FBsf0000201978),(TF_binding_site|mE1_TFBS_HSA|FBsf0000351983)
X_2289989_SNP	T	G	G	0.4099	66	95	-0.07196	5.247e-05	4.9229e-05	-0.08368	1.548e-05	9.44117e-06	-0.07782	1.055e-05	6.66207e-06	0.01172	0.3126	0.3269	SiteClass[|||],TranscriptAnnot[INTERGENIC(MODIFIER|||||||||)]	(TF_binding_site|mE1_TFBS_chinmo|FBsf0000208190)
3L_6864321_SNP	G	C	G	0.1939	32	133	-0.05396	0.01556	0.018021	-0.1116	2.941e-06	6.67602e-06	-0.08278	0.0001601	0.000328278	0.05765	7.373e-05	6.00574e-05	SiteClass[|||],TranscriptAnnot[INTERGENIC(MODIFIER|||||||||)]	(TF_binding_site|mE1_TFBS_chinmo|FBsf0000209884),(TF_binding_site|mE1_TFBS_HSA|FBsf0000362802)
2L_5095913_MNP	TTA	CCT	CCT	0.05357	9	159	-0.1659	1.192e-05	6.71437e-06	-0.112	0.00826	0.00833608	-0.139	0.0002657	0.000210588	-0.05388	0.03602	0.0341271	SiteClass[FBgn0031682|CG5828|DOWNSTREAM|188;FBgn0031683|CG4230|UPSTREAM|314],TranscriptAnnot[DOWNSTREAM(MODIFIER||||361|CG5828|protein_coding|CODING|FBtr0079018|);DOWNSTREAM(MODIFIER||||361|CG5828|protein_coding|CODING|FBtr0329981|);INTERGENIC(MODIFIER|||||||||);UPSTREAM(MODIFIER||||323|CG4230|protein_coding|CODING|FBtr0079019|);UPSTREAM(MODIFIER||||327|CG4230|protein_coding|CODING|FBtr0329982|);…	(TF_binding_site|BDTNP1_TFBS_dl|FBsf0000296744),(TF_binding_site|BDTNP1_TFBS_Med|FBsf0000277610),(TF_binding_site|BDTNP1_TFBS_z|FBsf0000196015),(TF_binding_site|mE1_TFBS_cad|FBsf0000241392)
3R_11115349_SNP	A	G	A	0.09816	16	147	-0.09986	0.0008173	0.00116937	-0.1524	2.208e-06	6.72831e-06	-0.1261	1.802e-05	5.02929e-05	0.05252	0.00809	0.00695936	SiteClass[FBgn0003721|Tm1|INTRON|0],TranscriptAnnot[INTRON(MODIFIER||||161|Tm1|protein_coding|CODING|FBtr0305655|3);INTRON(MODIFIER||||284|Tm1|protein_coding|CODING|FBtr0089968|3);INTRON(MODIFIER||||285|Tm1|protein_coding|CODING|FBtr0089964|3);INTRON(MODIFIER||||285|Tm1|protein_coding|CODING|FBtr0089967|3);INTRON(MODIFIER||||285|Tm1|protein_coding|CODING|FBtr0301959|3);INTRON(MODIFIER||||285|Tm1|…	(TF_binding_site|BDTNP1_TFBS_da|FBsf0000329306),(TF_binding_site|BDTNP1_TFBS_dl|FBsf0000311850),(TF_binding_site|BDTNP1_TFBS_gt|FBsf0000294422),(TF_binding_site|BDTNP1_TFBS_sna|FBsf0000271028)
X_15223220_SNP	G	C	C	0.07692	13	156	-0.143	6.913e-06	9.62302e-06	-0.1609	4.056e-06	1.99543e-05	-0.1519	1.496e-06	6.78942e-06	0.0179	0.4097	0.406195	SiteClass[FBgn0015926|dah|SYNONYMOUS_CODING|0],TranscriptAnnot[SYNONYMOUS_CODING(LOW|SILENT|ctC/ctG|L205|646|dah|protein_coding|CODING|FBtr0330404|);SYNONYMOUS_CODING(LOW|SILENT|ctC/ctG|L208|649|dah|protein_coding|CODING|FBtr0074007|)]	(TF_binding_site|mE1_TFBS_chinmo|FBsf0000208951),(TF_binding_site|mE1_TFBS_HSA|FBsf0000348093),(TF_binding_site|mE1_TFBS_sens|FBsf0000220964)
3R_9081309_SNP	G	A	A	0.1056	17	144	-0.09263	0.001509	0.000635275	-0.1316	3.299e-05	6.79499e-06	-0.1121	0.0001026	1.15587e-05	0.03898	0.04597	0.0406847	SiteClass[FBgn0000024|Ace|INTRON|0],TranscriptAnnot[INTRON(MODIFIER||||636|Ace|protein_coding|CODING|FBtr0335223|1);INTRON(MODIFIER||||649|Ace|protein_coding|CODING|FBtr0082780|1);INTRON(MODIFIER||||649|Ace|protein_coding|CODING|FBtr0300486|2)]	-
3R_24605338_SNP	A	T	T	0.0679	11	151	-0.1556	3.025e-06	6.79902e-06	-0.1284	0.0007881	0.00133578	-0.142	3.02e-05	7.30331e-05	-0.02724	0.2291	0.242183	SiteClass[|||],TranscriptAnnot[INTERGENIC(MODIFIER|||||||||)]	-
3R_9146437_SNP	T	C	C	0.06211	10	151	-0.1599	1.16e-05	7.12558e-06	-0.1634	3.523e-05	3.4435e-05	-0.1617	6.99e-06	6.83211e-06	0.003559	0.8849	0.884025	SiteClass[|||],TranscriptAnnot[INTERGENIC(MODIFIER|||||||||)]	(TF_binding_site|mE1_TFBS_HSA|FBsf0000371182)
X_7802747_SNP	A	G	G	0.1091	18	147	-0.1125	5.411e-05	8.77042e-05	-0.1372	6.737e-06	6.83558e-06	-0.1248	6.147e-06	8.33711e-06	0.0247	0.193	0.184339	SiteClass[FBgn0029975|CG1444|UPSTREAM|164;FBgn0029974|dpr14|UPSTREAM|428],TranscriptAnnot[INTERGENIC(MODIFIER|||||||||);UPSTREAM(MODIFIER||||321|CG1444|protein_coding|CODING|FBtr0071091|);UPSTREAM(MODIFIER||||340|dpr14|protein_coding|CODING|FBtr0071134|);UPSTREAM(MODIFIER||||340|dpr14|protein_coding|CODING|FBtr0307270|)]	(TF_binding_site|BDTNP1_TFBS_dl|FBsf0000317479),(TF_binding_site|mE1_TFBS_HSA|FBsf0000380389),(TF_binding_site|mE1_TFBS_sens|FBsf0000220064),(TF_binding_site|mE1_TFBS_Trl|FBsf0000342615)
X_11564133_SNP	A	C	C	0.08434	14	152	-0.12	0.0001024	2.69579e-05	-0.1091	0.001422	9.09445e-05	-0.1145	0.0002039	6.85365e-06	-0.01088	0.605	0.601981	SiteClass[FBgn0004370|Ptp10D|INTRON|0],TranscriptAnnot[INTRON(MODIFIER||||1558|Ptp10D|protein_coding|CODING|FBtr0273235|7);INTRON(MODIFIER||||1558|Ptp10D|protein_coding|CODING|FBtr0331406|8);INTRON(MODIFIER||||1631|Ptp10D|protein_coding|CODING|FBtr0073522|7);INTRON(MODIFIER||||1653|Ptp10D|protein_coding|CODING|FBtr0330394|8);INTRON(MODIFIER||||1990|Ptp10D|protein_coding|CODING|FBtr0330392|7);INTR…	-
X_6214072_SNP	A	T	T	0.08284	14	155	0.0198	0.5317	0.408633	-0.07122	0.0396	0.0820493	-0.02571	0.4152	0.625424	0.09102	8.08e-06	6.91239e-06	SiteClass[FBgn0029864|CG15894|INTRON|0],TranscriptAnnot[INTRON(MODIFIER||||1598|CG15894|protein_coding|CODING|FBtr0112955|1);UPSTREAM(MODIFIER||||1543|CG15894|protein_coding|CODING|FBtr0070901|)]	-
2L_5701956_SNP	A	T	T	0.2298	37	124	-0.05176	0.0134	0.0063539	-0.08989	5.586e-05	6.95107e-06	-0.07083	0.0005538	6.72866e-05	0.03813	0.005543	0.00587055	SiteClass[|||],TranscriptAnnot[INTERGENIC(MODIFIER|||||||||)]	-
2L_5701932_SNP	A	T	T	0.3684	56	96	-0.05782	0.001947	0.000890334	-0.08657	2.21e-05	7.02151e-06	-0.0722	0.0001006	2.265e-05	0.02875	0.01929	0.021099	SiteClass[|||],TranscriptAnnot[INTERGENIC(MODIFIER|||||||||)]	-
3R_6279889_SNP	T	C	T	0.281	43	110	-0.08476	1.395e-05	7.09406e-06	-0.07258	0.000849	0.000240281	-0.07867	5.339e-05	1.15726e-05	-0.01218	0.3785	0.364283	SiteClass[|||],TranscriptAnnot[INTERGENIC(MODIFIER|||||||||)]	(TF_binding_site|mE1_TFBS_h|FBsf0000257357)
3R_8965839_SNP	T	C	C	0.3716	55	93	0.07961	4.305e-05	1.12432e-05	0.07925	0.0002507	8.19843e-05	0.07943	4.541e-05	7.16036e-06	0.0003544	0.9787	0.977737	SiteClass[FBgn0038118|timeout|INTRON|0;FBgn0260793|2mit|INTRON|0],TranscriptAnnot[INTRON(MODIFIER||||1141|2mit|protein_coding|CODING|FBtr0301436|2);INTRON(MODIFIER||||1155|2mit|protein_coding|CODING|FBtr0330143|2);INTRON(MODIFIER||||1384|timeout|protein_coding|CODING|FBtr0082712|11)]	-
3R_6187998_SNP	C	T	T	0.0625	10	150	-0.136	0.0002558	7.13619e-05	-0.1381	0.0006276	3.49265e-05	-0.137	0.0001996	7.18819e-06	0.002045	0.9333	0.933208	SiteClass[FBgn0020379|Rfx|UTR_3_PRIME|0;FBgn0015396|jumu|DOWNSTREAM|664],TranscriptAnnot[DOWNSTREAM(MODIFIER||||719|jumu|protein_coding|CODING|FBtr0082237|);UTR_3_PRIME(MODIFIER||||860|Rfx|protein_coding|CODING|FBtr0337104|9);UTR_3_PRIME(MODIFIER||||882|Rfx|protein_coding|CODING|FBtr0337103|8);UTR_3_PRIME(MODIFIER||||889|Rfx|protein_coding|CODING|FBtr0337106|11);UTR_3_PRIME(MODIFIER||||897|Rfx|pr…	-
3R_9005502_SNP	T	G	G	0.481	76	82	-0.07667	2.172e-05	7.19277e-06	-0.07306	0.0002153	0.000105253	-0.07486	2.948e-05	7.60702e-06	-0.00361	0.7657	0.761493	SiteClass[|||],TranscriptAnnot[INTERGENIC(MODIFIER|||||||||)]	-
2L_13244570_SNP	G	A	A	0.06548	11	157	-0.1547	7.059e-06	7.21634e-06	-0.1073	0.005357	0.00725512	-0.131	0.0001546	0.000207163	-0.0474	0.04259	0.0406838	SiteClass[FBgn0041720|snRNA:U2:34ABc|UPSTREAM|9;FBgn0003935|snRNA:U5:34A|UPSTREAM|278],TranscriptAnnot[INTERGENIC(MODIFIER|||||||||);UPSTREAM(MODIFIER|||||snRNA:U2:34ABc|snRNA|NON_CODING|FBtr0091789|);UPSTREAM(MODIFIER|||||snRNA:U5:34A|snRNA|NON_CODING|FBtr0080451|)]	(TF_binding_site|mE1_TFBS_cad|FBsf0000242025),(TF_binding_site|mE1_TFBS_D|FBsf0000238119),(TF_binding_site|mE1_TFBS_disco|FBsf0000259366),(TF_binding_site|mE1_TFBS_HSA|FBsf0000350756)
3L_10341243_SNP	T	A	A	0.06024	10	156	-0.07727	0.03628	0.0349199	-0.174	1.131e-05	7.21663e-06	-0.1257	0.0005455	0.00025599	0.09677	6.237e-05	4.747e-05	SiteClass[FBgn0265415|CR44327|UPSTREAM|37],TranscriptAnnot[INTERGENIC(MODIFIER|||||||||);UPSTREAM(MODIFIER|||||CR44327|ncRNA|NON_CODING|FBtr0339670|)]	-
3R_13759369_SNP	A	T	T	0.05488	9	155	-0.1683	5.653e-06	7.26179e-06	-0.1632	8.738e-05	0.000102783	-0.1658	8.501e-06	1.07099e-05	-0.005084	0.8438	0.842687	SiteClass[FBgn0263995|cpo|INTRON|0],TranscriptAnnot[INTRON(MODIFIER||||606|cpo|protein_coding|CODING|FBtr0330276|1);INTRON(MODIFIER||||606|cpo|protein_coding|CODING|FBtr0330278|1);INTRON(MODIFIER||||607|cpo|protein_coding|CODING|FBtr0330275|1);INTRON(MODIFIER||||607|cpo|protein_coding|CODING|FBtr0330277|1);INTRON(MODIFIER||||749|cpo|protein_coding|CODING|FBtr0330273|1);INTRON(MODIFIER||||762|cpo|…	-
3R_13895303_SNP	A	G	G	0.1918	28	118	-0.1067	1.967e-06	7.28509e-06	-0.07807	0.002007	0.00858859	-0.09241	4.584e-05	0.000235785	-0.02867	0.05799	0.0665775	SiteClass[|||],TranscriptAnnot[INTERGENIC(MODIFIER|||||||||)]	-
2L_15274416_SNP	G	A	A	0.05952	10	158	-0.09086	0.01342	0.0180659	-0.1909	1.266e-06	7.30405e-06	-0.1409	9.816e-05	0.000463074	0.1001	2.988e-05	2.4946e-05	SiteClass[FBgn0086691|UK114|INTRON|0],TranscriptAnnot[INTRON(MODIFIER||||138|UK114|protein_coding|CODING|FBtr0080746|2);INTRON(MODIFIER||||138|UK114|protein_coding|CODING|FBtr0332376|2)]	(TF_binding_site|BDTNP1_TFBS_da|FBsf0000322520),(TF_binding_site|BDTNP1_TFBS_twi|FBsf0000201777),(TF_binding_site|mE1_TFBS_cad|FBsf0000242179),(TF_binding_site|mE1_TFBS_HSA|FBsf0000351334)
2L_9230375_SNP	A	G	G	0.2407	39	123	-0.06643	0.001321	0.000817705	-0.1002	5.928e-06	7.32325e-06	-0.08331	4.146e-05	2.7758e-05	0.03376	0.01245	0.013094	SiteClass[FBgn0041092|tai|INTRON|0],TranscriptAnnot[INTRON(MODIFIER||||1918|tai|protein_coding|CODING|FBtr0303873|3);INTRON(MODIFIER||||1918|tai|protein_coding|CODING|FBtr0333405|2);INTRON(MODIFIER||||2014|tai|protein_coding|CODING|FBtr0303872|3);INTRON(MODIFIER||||2026|tai|protein_coding|CODING|FBtr0303870|3);INTRON(MODIFIER||||2026|tai|protein_coding|CODING|FBtr0303871|2);INTRON(MODIFIER||||204…	(TF_binding_site|BDTNP1_TFBS_twi|FBsf0000201312)
3L_10203429_SNP	T	A	T	0.2201	35	124	-0.09616	7.841e-06	7.35182e-06	-0.1001	1.795e-05	7.87914e-05	-0.09811	4.01e-06	1.057e-05	0.003894	0.7846	0.785415	SiteClass[|||],TranscriptAnnot[INTERGENIC(MODIFIER|||||||||)]	-
3R_16236940_SNP	T	A	A	0.09317	15	146	-0.1209	6.19e-05	1.51709e-05	-0.1028	0.001864	0.000141163	-0.1118	0.0002211	7.37114e-06	-0.0181	0.3247	0.371141	SiteClass[FBgn0262869|mun|INTRON|0],TranscriptAnnot[INTRON(MODIFIER||||1101|mun|protein_coding|CODING|FBtr0306202|3);INTRON(MODIFIER||||1168|mun|protein_coding|CODING|FBtr0306203|2);INTRON(MODIFIER||||1212|mun|protein_coding|CODING|FBtr0306201|3);INTRON(MODIFIER||||1212|mun|protein_coding|CODING|FBtr0306204|2);INTRON(MODIFIER||||1217|mun|protein_coding|CODING|FBtr0330033|3);INTRON(MODIFIER||||127…	-
X_9417096_SNP	C	T	T	0.1024	17	149	-0.1152	5.583e-05	3.84429e-05	-0.1211	0.0001188	2.95782e-05	-0.1182	3.301e-05	7.3762e-06	0.005899	0.7607	0.757752	SiteClass[FBgn0052700|CG32700|INTRON|0],TranscriptAnnot[INTRON(MODIFIER||||218|CG32700|protein_coding|CODING|FBtr0071373|1);INTRON(MODIFIER||||218|CG32700|protein_coding|CODING|FBtr0071374|1)]	-
X_14398796_SNP	C	T	T	0.1062	17	143	-0.1234	7.908e-06	7.45351e-06	-0.08907	0.004372	0.00105704	-0.1062	0.000132	3.47519e-05	-0.03434	0.0821	0.0718297	SiteClass[|||],TranscriptAnnot[INTERGENIC(MODIFIER|||||||||)]	(TF_binding_site|BDTNP1_TFBS_dl|FBsf0000319054),(TF_binding_site|mE1_TFBS_HSA|FBsf0000347869),(TF_binding_site|mE1_TFBS_HSA|FBsf0000347870)
3R_8986293_SNP	C	T	T	0.4545	70	84	-0.07668	3.555e-05	1.41712e-05	-0.08042	6.307e-05	4.70601e-05	-0.07855	1.798e-05	7.54887e-06	0.003746	0.7626	0.756687	SiteClass[FBgn0038118|timeout|INTRON|0],TranscriptAnnot[INTRON(MODIFIER||||1384|timeout|protein_coding|CODING|FBtr0082712|14)]	-
3L_22334962_SNP	T	C	C	0.08589	14	149	-0.03105	0.3341	0.385192	-0.1218	0.0004475	0.00106945	-0.07643	0.01622	0.0453125	0.09076	1.258e-05	7.65078e-06	SiteClass[FBgn0004449|Ten-m|INTRON|0],TranscriptAnnot[INTRON(MODIFIER||||2731|Ten-m|protein_coding|CODING|FBtr0078509|1);INTRON(MODIFIER||||3297|Ten-m|protein_coding|CODING|FBtr0306107|1);INTRON(MODIFIER||||3349|Ten-m|protein_coding|CODING|FBtr0330159|1)]	-
3R_5646340_SNP	T	C	C	0.05917	10	159	-0.1599	8.55e-06	1.17972e-05	-0.1535	0.0001148	9.2972e-05	-0.1567	1.25e-05	7.71495e-06	-0.006447	0.7928	0.791257	SiteClass[FBgn0262104|CG42857|UTR_3_PRIME|0;FBgn0037765|CG9458|UPSTREAM|741],TranscriptAnnot[UPSTREAM(MODIFIER||||264|CG9458|protein_coding|CODING|FBtr0082152|);UTR_3_PRIME(MODIFIER||||138|CG42857|protein_coding|CODING|FBtr0304028|2)]	-
3R_26792111_SNP	T	C	C	0.06509	11	158	-0.151	1.135e-05	7.7207e-06	-0.1247	0.001129	0.000749701	-0.1379	6.341e-05	5.19325e-05	-0.02626	0.2623	0.258783	SiteClass[|||],TranscriptAnnot[INTERGENIC(MODIFIER|||||||||)]	-
3R_9036107_SNP	G	C	G	0.3618	55	97	0.07656	6.114e-05	4.11163e-05	0.08748	3.06e-05	1.96212e-05	0.08202	1.583e-05	7.73643e-06	-0.01091	0.397	0.386318	SiteClass[FBgn0038126|CG8483|INTRON|0],TranscriptAnnot[INTRON(MODIFIER||||392|CG8483|protein_coding|CODING|FBtr0082782|2)]	-
2R_9390387_SNP	G	A	G	0.2956	47	112	-0.08237	1.34e-05	2.33327e-05	-0.09232	1.246e-05	1.71938e-05	-0.08735	4.137e-06	7.75973e-06	0.009949	0.4444	0.44319	SiteClass[FBgn0033845|mars|UTR_5_PRIME|0;FBgn0004638|drk|UPSTREAM|41],TranscriptAnnot[UPSTREAM(MODIFIER||||211|drk|protein_coding|CODING|FBtr0087693|);UPSTREAM(MODIFIER||||211|drk|protein_coding|CODING|FBtr0087694|);UPSTREAM(MODIFIER||||211|drk|protein_coding|CODING|FBtr0087695|);UPSTREAM(MODIFIER||||211|drk|protein_coding|CODING|FBtr0087696|);UPSTREAM(MODIFIER||||211|drk|protein_coding|CODING|FB…	(TF_binding_site|BDTNP1_TFBS_da|FBsf0000324117),(TF_binding_site|BDTNP1_TFBS_Med|FBsf0000280213),(TF_binding_site|BDTNP1_TFBS_prd|FBsf0000274399),(TF_binding_site|BDTNP1_TFBS_twi|FBsf0000199269),(TF_binding_site|mE1_TFBS_cad|FBsf0000246553),(TF_binding_site|mE1_TFBS_D|FBsf0000240611),(TF_binding_site|mE1_TFBS_disco|FBsf0000259726),(TF_binding_site|mE1_TFBS_HSA|FBsf0000356359),(TF_binding_site|mE1…
3R_9101860_SNP	A	T	T	0.2839	44	111	-0.08937	8.036e-06	7.78714e-06	-0.07123	0.001406	0.0035174	-0.0803	6.277e-05	0.000134031	-0.01814	0.1838	0.17165	SiteClass[|||],TranscriptAnnot[INTERGENIC(MODIFIER|||||||||)]	-
3L_6974069_SNP	T	G	G	0.07595	12	146	-0.1188	0.0003609	0.000256751	-0.1614	1.076e-05	7.79229e-06	-0.1401	2.441e-05	1.87247e-05	0.04258	0.05682	0.0564023	SiteClass[FBgn0001104|G-ialpha65A|UPSTREAM|916],TranscriptAnnot[INTERGENIC(MODIFIER|||||||||);UPSTREAM(MODIFIER||||355|G-ialpha65A|protein_coding|CODING|FBtr0076934|)]	(TF_binding_site|BDTNP1_TFBS_dl|FBsf0000306012),(TF_binding_site|BDTNP1_TFBS_Med|FBsf0000282369),(TF_binding_site|BDTNP1_TFBS_twi|FBsf0000203124)
X_7769480_SNP	C	T	C	0.1071	18	150	-0.08285	0.0031	0.00241284	-0.1279	2.607e-05	7.81464e-06	-0.1054	0.0001435	3.95697e-05	0.04502	0.01567	0.0148265	SiteClass[FBgn0029966|Ir7c|SYNONYMOUS_CODING|0],TranscriptAnnot[SYNONYMOUS_CODING(LOW|SILENT|Ctg/Ttg|L208|625|Ir7c|protein_coding|CODING|FBtr0071087|);SYNONYMOUS_CODING(LOW|SILENT|Ctg/Ttg|L208|625|Ir7c|protein_coding|CODING|FBtr0309827|)]	-
2L_9557544_SNP	T	G	T	0.1313	21	139	-0.07438	0.004913	0.0016314	-0.119	3.636e-05	7.92535e-06	-0.0967	0.0002295	5.73721e-05	0.04464	0.01051	0.00996704	SiteClass[FBgn0032129|jp|INTRON|0],TranscriptAnnot[INTRON(MODIFIER||||1054|jp|protein_coding|CODING|FBtr0079860|1);INTRON(MODIFIER||||1054|jp|protein_coding|CODING|FBtr0079861|1);INTRON(MODIFIER||||1054|jp|protein_coding|CODING|FBtr0304056|1);INTRON(MODIFIER||||1054|jp|protein_coding|CODING|FBtr0304057|1)]	-
X_21261058_SNP	G	C	G	0.4788	79	86	0.06399	0.0002557	2.99098e-05	0.06437	0.0008649	8.7073e-05	0.06418	0.0002358	7.96952e-06	-0.0003771	0.9746	0.974183	SiteClass[FBgn0020272|mst|SYNONYMOUS_CODING|0],TranscriptAnnot[SYNONYMOUS_CODING(LOW|SILENT|acG/acC|T302|574|mst|protein_coding|CODING|FBtr0077211|)]	(TF_binding_site|mE1_TFBS_cad|FBsf0000243829),(TF_binding_site|mE1_TFBS_chinmo|FBsf0000209403),(TF_binding_site|mE1_TFBS_HSA|FBsf0000350208),(TF_binding_site|mE1_TFBS_sens|FBsf0000221977)
2L_3398287_SNP	A	G	G	0.06024	10	156	-0.138	0.0001315	0.000231786	-0.1886	1.678e-06	7.97403e-06	-0.1633	5.02e-06	2.43825e-05	0.05064	0.03645	0.0365145	SiteClass[FBgn0085204|CG34175|SYNONYMOUS_CODING|0],TranscriptAnnot[SYNONYMOUS_CODING(LOW|SILENT|ccG/ccA|P51|86|CG34175|protein_coding|CODING|FBtr0112366|)]	-
X_19001692_SNP	A	G	G	0.3273	54	111	-0.0712	0.0001292	4.98558e-05	-0.07827	0.0001279	4.65581e-05	-0.07473	5.34e-05	7.9967e-06	0.007064	0.5744	0.568633	SiteClass[|||],TranscriptAnnot[INTERGENIC(MODIFIER|||||||||)]	-
3R_9127593_SNP	C	T	T	0.1118	18	143	-0.1031	0.0002758	0.000392045	-0.148	1.367e-06	8.05018e-06	-0.1255	7.18e-06	3.92067e-05	0.04492	0.01714	0.0153142	SiteClass[FBgn0038136|CG8774|SYNONYMOUS_CODING|0;FBgn0052473|CG32473|UPSTREAM|777],TranscriptAnnot[SYNONYMOUS_CODING(LOW|SILENT|gtT/gtC|V766|885|CG8774|protein_coding|CODING|FBtr0082740|);SYNONYMOUS_CODING(LOW|SILENT|gtT/gtC|V823|942|CG8774|protein_coding|CODING|FBtr0082741|);UPSTREAM(MODIFIER||||1012|CG32473|protein_coding|CODING|FBtr0082742|)]	(TF_binding_site|mE1_TFBS_HSA|FBsf0000371177)
2L_13944445_SNP	C	T	T	0.2244	35	121	0.005323	0.8022	0.643377	-0.05682	0.01327	0.0416145	-0.02575	0.2192	0.412689	0.06214	1.069e-05	8.14596e-06	SiteClass[FBgn0032536|Ance-3|INTRON|0;FBgn0028544|CG16884|DOWNSTREAM|307],TranscriptAnnot[DOWNSTREAM(MODIFIER||||277|CG16884|protein_coding|CODING|FBtr0080557|);INTRON(MODIFIER||||844|Ance-3|protein_coding|CODING|FBtr0100327|7)]	-
3R_10876130_SNP	A	G	G	0.2375	38	122	-0.07233	0.0006366	0.000257672	-0.09243	6.257e-05	8.16732e-06	-0.08238	8.66e-05	1.09202e-05	0.0201	0.1567	0.146383	SiteClass[|||],TranscriptAnnot[INTERGENIC(MODIFIER|||||||||)]	-
3R_8986186_SNP	A	T	T	0.4452	69	86	-0.07438	5.469e-05	2.08284e-05	-0.07982	6.961e-05	4.57725e-05	-0.0771	2.423e-05	8.19273e-06	0.005437	0.6581	0.652432	SiteClass[FBgn0038118|timeout|INTRON|0],TranscriptAnnot[INTRON(MODIFIER||||1384|timeout|protein_coding|CODING|FBtr0082712|14)]	-
2L_14581715_SNP	C	A	A	0.05556	9	153	0.02119	0.5833	0.422917	-0.08981	0.03418	0.073753	-0.03431	0.3743	0.617088	0.111	7.421e-06	8.23151e-06	SiteClass[|||],TranscriptAnnot[INTERGENIC(MODIFIER|||||||||)]	(TF_binding_site|BDTNP1_TFBS_dl|FBsf0000298695),(TF_binding_site|BDTNP1_TFBS_twi|FBsf0000201742)
2R_7886590_SNP	G	A	A	0.05325	9	160	-0.165	1.273e-05	8.27472e-06	-0.1632	9.377e-05	0.000171287	-0.1641	1.342e-05	1.70334e-05	-0.001735	0.9464	0.945938	SiteClass[|||],TranscriptAnnot[INTERGENIC(MODIFIER|||||||||)]	-
2L_17812817_SNP	A	G	G	0.103	17	148	-0.1275	5.854e-06	8.30709e-06	-0.09056	0.004047	0.00880493	-0.109	0.000114	0.000218195	-0.03693	0.05646	0.052248	SiteClass[FBgn0262018|CadN2|INTRON|0;FBgn0262017|CG42830|UPSTREAM|145],TranscriptAnnot[INTRON(MODIFIER||||1799|CadN2|protein_coding|CODING|FBtr0303836|3);INTRON(MODIFIER||||1799|CadN2|protein_coding|CODING|FBtr0308770|4);UPSTREAM(MODIFIER||||187|CG42830|protein_coding|CODING|FBtr0303837|)]	-
3L_2699537_SNP	C	T	T	0.1024	17	149	-0.0007533	0.9795	0.924182	-0.08355	0.008696	0.0156696	-0.04215	0.1478	0.220902	0.08279	1.019e-05	8.3431e-06	SiteClass[FBgn0264606|CG43955|INTRON|0],TranscriptAnnot[INTRON(MODIFIER||||1314|CG43955|protein_coding|CODING|FBtr0333632|1);INTRON(MODIFIER||||643|CG43955|protein_coding|CODING|FBtr0333630|1);INTRON(MODIFIER||||643|CG43955|protein_coding|CODING|FBtr0333631|1);INTRON(MODIFIER||||969|CG43955|protein_coding|CODING|FBtr0333629|1)]	-
3R_6399014_DEL	G	GC	GC	0.1739	28	133	-0.09882	2.239e-05	8.35727e-06	-0.05888	0.02443	0.00641749	-0.07885	0.0007835	0.00010446	-0.03994	0.01179	0.00942291	SiteClass[FBgn0001235|hth|INTRON|0],TranscriptAnnot[INTRON(MODIFIER||||458|hth|protein_coding|CODING|FBtr0301956|5);INTRON(MODIFIER||||472|hth|protein_coding|CODING|FBtr0082256|6);INTRON(MODIFIER||||487|hth|protein_coding|CODING|FBtr0082255|6)]	-
3R_5202766_SNP	T	G	G	0.4467	67	83	0.07779	4.099e-05	1.73706e-05	0.08645	1.755e-05	2.1139e-05	0.08212	1.088e-05	8.38306e-06	-0.008664	0.4572	0.479858	SiteClass[FBgn0000723|Fps85D|INTRON|0],TranscriptAnnot[INTRON(MODIFIER||||1325|Fps85D|protein_coding|CODING|FBtr0082052|3);INTRON(MODIFIER||||804|Fps85D|protein_coding|CODING|FBtr0082051|3);INTRON(MODIFIER||||871|Fps85D|protein_coding|CODING|FBtr0333295|3);INTRON(MODIFIER||||872|Fps85D|protein_coding|CODING|FBtr0333296|3)]	(TF_binding_site|BDTNP1_TFBS_twi|FBsf0000264559)
X_19081522_SNP	T	C	C	0.08982	15	152	-0.1206	6.179e-05	3.03604e-05	-0.1089	0.001095	7.11905e-05	-0.1148	0.000136	8.44197e-06	-0.01168	0.5685	0.563325	SiteClass[FBgn0030992|CG33253|DOWNSTREAM|210;FBgn0030993|Mec2|UPSTREAM|546],TranscriptAnnot[DOWNSTREAM(MODIFIER||||367|CG33253|protein_coding|CODING|FBtr0074668|);DOWNSTREAM(MODIFIER||||414|CG33253|protein_coding|CODING|FBtr0331155|);INTERGENIC(MODIFIER|||||||||);UPSTREAM(MODIFIER||||350|Mec2|protein_coding|CODING|FBtr0074669|)]	(TF_binding_site|BDTNP1_TFBS_da|FBsf0000333046),(TF_binding_site|BDTNP1_TFBS_dl|FBsf0000320278),(TF_binding_site|mE1_TFBS_cad|FBsf0000243683),(TF_binding_site|mE1_TFBS_HSA|FBsf0000349476),(TF_binding_site|mE1_TFBS_Trl|FBsf0000343221)
2R_11720773_SNP	A	G	G	0.06875	11	149	-0.1542	7.626e-06	8.48371e-06	-0.1019	0.009078	0.00988095	-0.128	0.000243	0.000274655	-0.05234	0.02617	0.0238836	SiteClass[FBgn0003130|Poxn|INTRON|0],TranscriptAnnot[INTRON(MODIFIER||||425|Poxn|protein_coding|CODING|FBtr0087311|1);INTRON(MODIFIER||||425|Poxn|protein_coding|CODING|FBtr0329908|1)]	(regulatory_region|REDfly_CRMs|FBsf0000436238)
3L_12409480_SNP	C	A	A	0.05455	9	156	-0.1679	1.062e-05	8.49838e-06	-0.1343	0.001491	0.00182679	-0.1511	7.379e-05	8.45261e-05	-0.03369	0.1926	0.187335	SiteClass[FBgn0020655|Gap69C|SYNONYMOUS_CODING|0],TranscriptAnnot[SYNONYMOUS_CODING(LOW|SILENT|ctT/ctG|L236|448|Gap69C|protein_coding|CODING|FBtr0332088|);SYNONYMOUS_CODING(LOW|SILENT|ctT/ctG|L236|468|Gap69C|protein_coding|CODING|FBtr0075981|)]	(TF_binding_site|mE1_TFBS_cad|FBsf0000244835),(TF_binding_site|mE1_TFBS_chinmo|FBsf0000210149)
3R_9158394_SNP	T	C	C	0.2157	33	120	-0.09722	1.072e-05	8.4986e-06	-0.06701	0.006596	0.0116221	-0.08212	0.000229	0.000364551	-0.03021	0.03533	0.0384748	SiteClass[FBgn0038139|CG8795|INTRON|0],TranscriptAnnot[INTRON(MODIFIER||||599|CG8795|protein_coding|CODING|FBtr0082774|2);UTR_5_PRIME(MODIFIER||||599|CG8795|protein_coding|CODING|FBtr0082773|2)]	(TF_binding_site|mE1_TFBS_HSA|FBsf0000371183),(TF_binding_site|mE1_TFBS_sbb|FBsf0000250855)
3L_11803374_SNP	T	C	C	0.07738	13	155	0.003728	0.9094	0.85992	-0.08951	0.01194	0.0115669	-0.04289	0.1875	0.211082	0.09324	1.033e-05	8.63066e-06	SiteClass[FBgn0259140|CG42255|INTRON|0],TranscriptAnnot[INTRON(MODIFIER||||3613|CG42255|protein_coding|CODING|FBtr0332131|7)]	(TF_binding_site|mE1_TFBS_cad|FBsf0000244782)
X_11564141_SNP	C	T	T	0.09091	14	140	-0.1191	0.0001633	3.12184e-05	-0.107	0.002355	0.000119287	-0.113	0.0003525	8.65071e-06	-0.01209	0.5759	0.563474	SiteClass[FBgn0004370|Ptp10D|INTRON|0],TranscriptAnnot[INTRON(MODIFIER||||1558|Ptp10D|protein_coding|CODING|FBtr0273235|7);INTRON(MODIFIER||||1558|Ptp10D|protein_coding|CODING|FBtr0331406|8);INTRON(MODIFIER||||1631|Ptp10D|protein_coding|CODING|FBtr0073522|7);INTRON(MODIFIER||||1653|Ptp10D|protein_coding|CODING|FBtr0330394|8);INTRON(MODIFIER||||1990|Ptp10D|protein_coding|CODING|FBtr0330392|7);INTR…	-
3R_25211897_INS	TT	T	T	0.1161	18	137	0.0134	0.6497	0.551335	-0.06754	0.033	0.0508121	-0.02707	0.3536	0.476369	0.08094	1.154e-05	8.6717e-06	SiteClass[FBgn0004369|Ptp99A|INTRON|0],TranscriptAnnot[INTRON(MODIFIER||||1397|Ptp99A|protein_coding|CODING|FBtr0303148|2)]	(TF_binding_site|mE1_TFBS_inv|FBsf0000237647)
3R_8979958_SNP	G	A	G	0.487	75	79	0.07694	2.346e-05	8.7124e-06	0.07408	0.000268	0.0001859	0.07551	3.601e-05	1.11177e-05	0.002862	0.8166	0.812193	SiteClass[FBgn0038118|timeout|INTRON|0;FBgn0260793|2mit|INTRON|0],TranscriptAnnot[INTRON(MODIFIER||||1141|2mit|protein_coding|CODING|FBtr0301436|2);INTRON(MODIFIER||||1155|2mit|protein_coding|CODING|FBtr0330143|2);INTRON(MODIFIER||||1384|timeout|protein_coding|CODING|FBtr0082712|11)]	-
3R_15617435_SNP	A	C	A	0.05195	8	146	-0.1539	0.000103	7.44767e-05	-0.1631	0.0002435	4.11533e-05	-0.1585	6.883e-05	8.73694e-06	0.009131	0.7388	0.736419	SiteClass[FBgn0051215|tRNA:CR31215|DOWNSTREAM|669],TranscriptAnnot[DOWNSTREAM(MODIFIER|||||tRNA:CR31215|tRNA|NON_CODING|FBtr0083793|);INTERGENIC(MODIFIER|||||||||)]	-
3R_9067436_DEL	G	GCAGAACTTTAACTCAACTTT	GCAGAACTTTAACTCAACTTT	0.08075	13	148	-0.1179	0.0002077	0.000156384	-0.1318	0.0002043	1.90263e-05	-0.1248	9.373e-05	8.74786e-06	0.01394	0.5124	0.518631	SiteClass[FBgn0000024|Ace|INTRON|0],TranscriptAnnot[INTRON(MODIFIER||||636|Ace|protein_coding|CODING|FBtr0335223|5);INTRON(MODIFIER||||649|Ace|protein_coding|CODING|FBtr0082780|5);INTRON(MODIFIER||||649|Ace|protein_coding|CODING|FBtr0300486|6)]	-
3R_11983383_SNP	T	A	A	0.4026	62	92	-0.08594	2.367e-06	8.80248e-06	-0.0806	6.757e-05	0.000651223	-0.08327	5.141e-06	7.17134e-05	-0.005335	0.6599	0.663813	SiteClass[FBgn0063649|CG6006|INTRON|0],TranscriptAnnot[INTRON(MODIFIER||||603|CG6006|protein_coding|CODING|FBtr0113477|1);UPSTREAM(MODIFIER||||569|CG6006|protein_coding|CODING|FBtr0083252|);UPSTREAM(MODIFIER||||569|CG6006|protein_coding|CODING|FBtr0309301|);UPSTREAM(MODIFIER||||569|CG6006|protein_coding|CODING|FBtr0309302|);UPSTREAM(MODIFIER||||569|CG6006|protein_coding|CODING|FBtr0309303|)]	-
X_11564155_SNP	T	A	A	0.07927	13	151	-0.1338	2.447e-05	1.07717e-05	-0.1203	0.0007089	0.000114821	-0.127	6.888e-05	8.81817e-06	-0.01355	0.5269	0.53	SiteClass[FBgn0004370|Ptp10D|INTRON|0],TranscriptAnnot[INTRON(MODIFIER||||1558|Ptp10D|protein_coding|CODING|FBtr0273235|7);INTRON(MODIFIER||||1558|Ptp10D|protein_coding|CODING|FBtr0331406|8);INTRON(MODIFIER||||1631|Ptp10D|protein_coding|CODING|FBtr0073522|7);INTRON(MODIFIER||||1653|Ptp10D|protein_coding|CODING|FBtr0330394|8);INTRON(MODIFIER||||1990|Ptp10D|protein_coding|CODING|FBtr0330392|7);INTR…	-
3R_6398938_SNP	A	T	T	0.1772	28	130	-0.09861	2.816e-05	8.84735e-06	-0.05881	0.02601	0.0062826	-0.07871	0.0009	0.000104271	-0.0398	0.01306	0.00982868	SiteClass[FBgn0001235|hth|INTRON|0],TranscriptAnnot[INTRON(MODIFIER||||458|hth|protein_coding|CODING|FBtr0301956|5);INTRON(MODIFIER||||472|hth|protein_coding|CODING|FBtr0082256|6);INTRON(MODIFIER||||487|hth|protein_coding|CODING|FBtr0082255|6)]	(TF_binding_site|BDTNP1_TFBS_dl|FBsf0000310940)
2R_9659409_SNP	T	G	G	0.08383	14	153	-0.1135	0.00027	0.000569297	-0.1593	1.718e-06	8.86268e-06	-0.1364	9.164e-06	5.24306e-05	0.04584	0.0183	0.0268957	SiteClass[FBgn0033867|Cpr50Ca|INTRON|0],TranscriptAnnot[INTRON(MODIFIER||||815|Cpr50Ca|protein_coding|CODING|FBtr0087629|2)]	-
2R_16682702_SNP	G	T	T	0.06587	11	156	-0.1472	2.021e-05	8.90658e-06	-0.1446	0.0001586	0.000171518	-0.1459	2.345e-05	1.2817e-05	-0.002564	0.9134	0.912398	SiteClass[|||],TranscriptAnnot[INTERGENIC(MODIFIER|||||||||)]	-
3R_8975496_SNP	T	C	C	0.3856	59	94	0.07803	3.451e-05	8.9297e-06	0.06583	0.001728	0.000576142	0.07193	0.0001438	2.21797e-05	0.0122	0.3357	0.324816	SiteClass[FBgn0038118|timeout|INTRON|0;FBgn0260793|2mit|INTRON|0],TranscriptAnnot[INTRON(MODIFIER||||1141|2mit|protein_coding|CODING|FBtr0301436|2);INTRON(MODIFIER||||1155|2mit|protein_coding|CODING|FBtr0330143|2);INTRON(MODIFIER||||1384|timeout|protein_coding|CODING|FBtr0082712|11)]	(TF_binding_site|BDTNP1_TFBS_twi|FBsf0000264852)
2R_8669236_SNP	A	G	G	0.184	30	133	-0.02292	0.3213	0.432025	-0.08803	0.0004338	0.000990746	-0.05547	0.01532	0.0457856	0.06512	1.496e-05	9.07663e-06	SiteClass[FBgn0003326|sca|INTRON|0],TranscriptAnnot[INTRON(MODIFIER||||799|sca|protein_coding|CODING|FBtr0087855|1);INTRON(MODIFIER||||799|sca|protein_coding|CODING|FBtr0087856|1)]	(TF_binding_site|BDTNP1_TFBS_da|FBsf0000324016),(TF_binding_site|BDTNP1_TFBS_dl|FBsf0000301713),(TF_binding_site|BDTNP1_TFBS_Med|FBsf0000280112)
2R_12766722_SNP	T	G	T	0.4813	77	83	0.07958	7.185e-06	9.10283e-06	0.07556	9.397e-05	0.000213936	0.07757	1.147e-05	3.05658e-05	0.004025	0.7208	0.733437	SiteClass[FBgn0025833|CG8910|INTRON|0],TranscriptAnnot[INTRON(MODIFIER||||608|CG8910|protein_coding|CODING|FBtr0087071|2)]	-
2R_13276317_SNP	A	C	C	0.1091	18	147	-0.1123	5.368e-05	9.51426e-05	-0.1411	3.47e-06	9.1067e-06	-0.1267	4.261e-06	2.15345e-05	0.02885	0.1272	0.12076	SiteClass[|||],TranscriptAnnot[INTERGENIC(MODIFIER|||||||||)]	(TF_binding_site|mE1_TFBS_Kr|FBsf0000253417)
3L_7731653_SNP	G	T	T	0.05389	9	158	-0.1668	1.128e-05	9.11498e-06	-0.168	6.236e-05	7.04796e-05	-0.1674	9.801e-06	1.33415e-05	0.0012	0.9631	0.962615	SiteClass[FBgn0035815|Snmp2|SYNONYMOUS_CODING|0;FBgn0052373|CG32373|INTRON|0],TranscriptAnnot[INTRON(MODIFIER||||486|CG32373|protein_coding|CODING|FBtr0076805|1);INTRON(MODIFIER||||486|CG32373|protein_coding|CODING|FBtr0076806|2);SYNONYMOUS_CODING(LOW|SILENT|ggA/ggC|G85|510|Snmp2|protein_coding|CODING|FBtr0110885|);SYNONYMOUS_CODING(LOW|SILENT|ggA/ggC|G85|556|Snmp2|protein_coding|CODING|FBtr03012…	-
3R_10875627_SNP	T	A	A	0.2767	44	115	-0.08582	4.293e-06	9.17737e-06	-0.08472	5.827e-05	0.000145271	-0.08527	5.442e-06	1.71761e-05	-0.001099	0.9344	0.93384	SiteClass[|||],TranscriptAnnot[INTERGENIC(MODIFIER|||||||||)]	-
X_19001698_SNP	T	A	A	0.2866	47	117	-0.07302	0.0001658	5.99962e-05	-0.07694	0.0003164	5.4325e-05	-0.07498	0.0001058	9.28386e-06	0.003918	0.7627	0.761388	SiteClass[|||],TranscriptAnnot[INTERGENIC(MODIFIER|||||||||)]	-
3R_26786635_SNP	G	A	A	0.05917	10	159	-0.1581	1.095e-05	9.29111e-06	-0.1319	0.0009851	0.000661209	-0.145	5.687e-05	5.15729e-05	-0.02623	0.2844	0.280821	SiteClass[FBgn0039812|CG15548|SYNONYMOUS_CODING|0],TranscriptAnnot[SYNONYMOUS_CODING(LOW|SILENT|agA/agG|R369|814|CG15548|protein_coding|CODING|FBtr0085731|)]	-
3R_13258647_SNP	C	T	T	0.05096	8	149	-0.1785	5.626e-06	9.33171e-06	-0.1463	0.0009755	0.00164379	-0.1624	4.317e-05	8.9193e-05	-0.03228	0.2293	0.232962	SiteClass[FBgn0038511|CG5873|INTRON|0],TranscriptAnnot[INTRON(MODIFIER||||753|CG5873|protein_coding|CODING|FBtr0083442|1)]	(TF_binding_site|BDTNP1_TFBS_twi|FBsf0000265321)
3L_4146796_SNP	C	T	C	0.2	33	132	-0.07282	0.0008732	0.000549727	-0.09978	2.667e-05	9.42559e-06	-0.0863	6.541e-05	1.66186e-05	0.02697	0.0671	0.0623309	SiteClass[FBgn0052260|CG32260|DOWNSTREAM|830],TranscriptAnnot[DOWNSTREAM(MODIFIER||||395|CG32260|protein_coding|CODING|FBtr0332657|);DOWNSTREAM(MODIFIER||||575|CG32260|protein_coding|CODING|FBtr0073214|);INTERGENIC(MODIFIER|||||||||)]	(TF_binding_site|BDTNP1_TFBS_dl|FBsf0000305533),(TF_binding_site|BDTNP1_TFBS_Med|FBsf0000282137),(TF_binding_site|mE1_TFBS_HSA|FBsf0000362031)
3L_3274845_SNP	T	A	A	0.05325	9	160	-0.1074	0.005211	0.00250921	-0.1573	0.0001708	9.50638e-06	-0.1324	0.0005102	2.82202e-05	0.04997	0.05132	0.0496082	SiteClass[FBgn0035428|CG14960|INTRON|0],TranscriptAnnot[INTRON(MODIFIER||||331|CG14960|protein_coding|CODING|FBtr0073051|2)]	-
3L_6866599_SNP	G	A	G	0.1988	33	133	-0.06	0.006241	0.00736014	-0.1115	2.118e-06	9.51998e-06	-0.08575	7.051e-05	0.000198316	0.0515	0.0003442	0.000303037	SiteClass[|||],TranscriptAnnot[INTERGENIC(MODIFIER|||||||||)]	-
3R_6346987_SNP	T	A	A	0.2549	39	114	-0.08426	7.444e-05	9.56441e-06	-0.05562	0.01766	0.00442059	-0.06994	0.0009843	8.47921e-05	-0.02864	0.04374	0.0375607	SiteClass[FBgn0001235|hth|INTRON|0],TranscriptAnnot[INTRON(MODIFIER||||218|hth|protein_coding|CODING|FBtr0301345|4);INTRON(MODIFIER||||458|hth|protein_coding|CODING|FBtr0301956|9);INTRON(MODIFIER||||472|hth|protein_coding|CODING|FBtr0082256|10);INTRON(MODIFIER||||487|hth|protein_coding|CODING|FBtr0082255|10)]	-
2L_8053369_SNP	G	C	C	0.05063	8	150	0.01447	0.729	0.694383	-0.1021	0.02332	0.0330393	-0.04384	0.2893	0.358388	0.1166	9.874e-06	9.57919e-06	SiteClass[FBgn0031981|CG7466|UTR_3_PRIME|0;FBgn0011230|poe|DOWNSTREAM|953],TranscriptAnnot[DOWNSTREAM(MODIFIER||||5322|poe|protein_coding|CODING|FBtr0079545|);UTR_3_PRIME(MODIFIER||||2898|CG7466|protein_coding|CODING|FBtr0079541|6)]	-
3R_13281835_SNP	A	C	C	0.0559	9	152	-0.1728	1.208e-06	9.61906e-06	-0.124	0.00265	0.00643005	-0.1484	4.456e-05	0.000402415	-0.04879	0.05635	0.0556693	SiteClass[FBgn0038512|CG14330|UTR_3_PRIME|0],TranscriptAnnot[UTR_3_PRIME(MODIFIER||||89|CG14330|protein_coding|CODING|FBtr0083443|1)]	-
3R_23938907_MNP	TGT	GAG	GAG	0.05161	8	147	-0.1645	4.741e-05	9.63694e-06	-0.1107	0.01597	0.00138783	-0.1376	0.0007896	5.22172e-05	-0.05376	0.0528	0.046186	SiteClass[|||],TranscriptAnnot[INTERGENIC(MODIFIER|||||||||)]	(TF_binding_site|BDTNP1_TFBS_hb|FBsf0000292831)
2L_8101432_SNP	T	A	A	0.05161	8	147	0.01584	0.6961	0.681154	-0.1008	0.02363	0.0252778	-0.04248	0.293	0.327637	0.1166	1.561e-05	9.65591e-06	SiteClass[FBgn0261822|Bsg|INTRON|0],TranscriptAnnot[INTRON(MODIFIER||||265|Bsg|protein_coding|CODING|FBtr0079566|2);INTRON(MODIFIER||||265|Bsg|protein_coding|CODING|FBtr0079567|2);INTRON(MODIFIER||||265|Bsg|protein_coding|CODING|FBtr0079568|2);INTRON(MODIFIER||||265|Bsg|protein_coding|CODING|FBtr0079569|2);INTRON(MODIFIER||||265|Bsg|protein_coding|CODING|FBtr0079570|2);INTRON(MODIFIER||||265|Bsg|…	(TF_binding_site|BDTNP1_TFBS_dl|FBsf0000297425),(TF_binding_site|mE1_TFBS_HSA|FBsf0000346642)
3L_7731601_SNP	A	T	T	0.05422	9	157	-0.1664	1.235e-05	9.67901e-06	-0.1675	6.762e-05	7.48436e-05	-0.167	1.074e-05	1.4228e-05	0.001132	0.9653	0.964757	SiteClass[FBgn0035815|Snmp2|INTRON|0;FBgn0052373|CG32373|INTRON|0],TranscriptAnnot[INTRON(MODIFIER||||486|CG32373|protein_coding|CODING|FBtr0076805|1);INTRON(MODIFIER||||486|CG32373|protein_coding|CODING|FBtr0076806|2);INTRON(MODIFIER||||510|Snmp2|protein_coding|CODING|FBtr0110885|2);INTRON(MODIFIER||||556|Snmp2|protein_coding|CODING|FBtr0301205|2);INTRON(MODIFIER||||556|Snmp2|protein_coding|CODI…	-
3R_10876191_SNP	T	A	A	0.2313	37	123	-0.07618	0.000358	0.00015885	-0.09445	4.857e-05	9.99217e-06	-0.08532	5.437e-05	9.71762e-06	0.01827	0.2017	0.191104	SiteClass[|||],TranscriptAnnot[INTERGENIC(MODIFIER|||||||||)]	-
3R_11587786_SNP	G	A	A	0.07317	12	152	-0.1413	1.809e-05	3.61571e-05	-0.1667	3.642e-06	1.30134e-05	-0.154	2.262e-06	9.77685e-06	0.02544	0.2648	0.255251	SiteClass[|||],TranscriptAnnot[INTERGENIC(MODIFIER|||||||||)]	-
2L_5621935_SNP	A	G	G	0.09375	15	145	-0.132	1.404e-05	9.79376e-06	-0.1302	8.032e-05	0.000118795	-0.1311	1.288e-05	1.55525e-05	-0.001797	0.9296	0.929318	SiteClass[FBgn0031726|Cyp6a16Psi|EXON|0],TranscriptAnnot[EXON(MODIFIER|||||Cyp6a16Psi|pseudogene|NON_CODING|FBtr0100853|3)]	-
3L_10203432_SNP	C	G	C	0.179	29	133	-0.1022	7.673e-06	9.80054e-06	-0.101	6.166e-05	0.000208772	-0.1016	7.833e-06	2.19381e-05	-0.00123	0.9377	0.935955	SiteClass[|||],TranscriptAnnot[INTERGENIC(MODIFIER|||||||||)]	-
3R_11983367_SNP	G	A	A	0.4145	63	89	-0.08536	3.361e-06	9.86521e-06	-0.08189	6.684e-05	0.000468555	-0.08362	5.958e-06	5.73527e-05	-0.00347	0.7796	0.777898	SiteClass[FBgn0063649|CG6006|INTRON|0],TranscriptAnnot[INTRON(MODIFIER||||603|CG6006|protein_coding|CODING|FBtr0113477|1);UPSTREAM(MODIFIER||||569|CG6006|protein_coding|CODING|FBtr0083252|);UPSTREAM(MODIFIER||||569|CG6006|protein_coding|CODING|FBtr0309301|);UPSTREAM(MODIFIER||||569|CG6006|protein_coding|CODING|FBtr0309302|);UPSTREAM(MODIFIER||||569|CG6006|protein_coding|CODING|FBtr0309303|)]	-
2R_9391161_SNP	T	G	T	0.284	46	116	-0.08175	1.995e-05	2.85633e-05	-0.09059	1.775e-05	2.14235e-05	-0.08617	5.915e-06	9.95479e-06	0.008841	0.5074	0.496774	SiteClass[FBgn0033845|mars|SYNONYMOUS_CODING|0;FBgn0004638|drk|UPSTREAM|815],TranscriptAnnot[SYNONYMOUS_CODING(LOW|SILENT|gcT/gcG|A207|921|mars|protein_coding|CODING|FBtr0087668|);SYNONYMOUS_CODING(LOW|SILENT|gcT/gcG|A207|921|mars|protein_coding|CODING|FBtr0301387|);UPSTREAM(MODIFIER||||211|drk|protein_coding|CODING|FBtr0087693|);UPSTREAM(MODIFIER||||211|drk|protein_coding|CODING|FBtr0087694|);UP…	(TF_binding_site|BDTNP1_TFBS_da|FBsf0000324117),(TF_binding_site|BDTNP1_TFBS_dl|FBsf0000301891),(TF_binding_site|BDTNP1_TFBS_Med|FBsf0000280214),(TF_binding_site|mE1_TFBS_cad|FBsf0000246553),(TF_binding_site|mE1_TFBS_hkb|FBsf0000255270),(TF_binding_site|mE1_TFBS_HSA|FBsf0000356360),(TF_binding_site|mE1_TFBS_sens|FBsf0000227816)
3R_13758989_SNP	G	T	T	0.05422	9	157	-0.1663	9.455e-06	9.963e-06	-0.1612	0.0001279	0.000155676	-0.1638	1.446e-05	1.77291e-05	-0.005143	0.8411	0.840833	SiteClass[FBgn0263995|cpo|INTRON|0],TranscriptAnnot[INTRON(MODIFIER||||606|cpo|protein_coding|CODING|FBtr0330276|1);INTRON(MODIFIER||||606|cpo|protein_coding|CODING|FBtr0330278|1);INTRON(MODIFIER||||607|cpo|protein_coding|CODING|FBtr0330275|1);INTRON(MODIFIER||||607|cpo|protein_coding|CODING|FBtr0330277|1);INTRON(MODIFIER||||749|cpo|protein_coding|CODING|FBtr0330273|1);INTRON(MODIFIER||||762|cpo|…	-
3R_6347074_SNP	G	A	A	0.2903	45	110	-0.08067	6.589e-05	9.96312e-06	-0.05034	0.02421	0.0102243	-0.06551	0.001198	0.00016978	-0.03032	0.02369	0.0207969	SiteClass[FBgn0001235|hth|INTRON|0],TranscriptAnnot[INTRON(MODIFIER||||218|hth|protein_coding|CODING|FBtr0301345|4);INTRON(MODIFIER||||458|hth|protein_coding|CODING|FBtr0301956|9);INTRON(MODIFIER||||472|hth|protein_coding|CODING|FBtr0082256|10);INTRON(MODIFIER||||487|hth|protein_coding|CODING|FBtr0082255|10)]	-
3L_6889038_SNP	T	C	C	0.2112	34	127	-0.07306	0.0008303	0.0006783	-0.1072	6.591e-06	1.00197e-05	-0.09011	3.137e-05	3.55736e-05	0.0341	0.01935	0.0171488	SiteClass[|||],TranscriptAnnot[INTERGENIC(MODIFIER|||||||||)]	-
2L_13404102_SNP	G	T	T	0.1364	21	133	-0.1135	4.029e-06	1.01496e-05	-0.09107	0.0009686	0.00260183	-0.1023	3.592e-05	0.000104768	-0.0224	0.1849	0.200652	SiteClass[FBgn0032521|CG7110|INTRON|0],TranscriptAnnot[INTRON(MODIFIER||||825|CG7110|protein_coding|CODING|FBtr0080500|5)]	-
3R_13368617_SNP	G	T	T	0.05488	9	155	-0.1721	5.104e-06	1.02032e-05	-0.1478	0.0005145	0.00122805	-0.16	2.759e-05	0.000107626	-0.02436	0.3385	0.341043	SiteClass[FBgn0025571|SF1|DOWNSTREAM|76],TranscriptAnnot[DOWNSTREAM(MODIFIER||||347|SF1|protein_coding|CODING|FBtr0331706|);INTRON(MODIFIER||||323|SF1|protein_coding|CODING|FBtr0331707|3);INTRON(MODIFIER||||787|SF1|protein_coding|CODING|FBtr0083456|4)]	-
3R_13491432_SNP	C	T	C	0.2194	34	121	-0.09545	6.728e-06	1.02286e-05	-0.06093	0.0109	0.0144844	-0.07819	0.0002621	0.000428732	-0.03452	0.01702	0.0163613	SiteClass[FBgn0038532|CG14322|INTRON|0],TranscriptAnnot[INTRON(MODIFIER||||1577|CG14322|protein_coding|CODING|FBtr0083476|4);INTRON(MODIFIER||||1580|CG14322|protein_coding|CODING|FBtr0331347|4);INTRON(MODIFIER||||1597|CG14322|protein_coding|CODING|FBtr0331346|5)]	(TF_binding_site|BDTNP1_TFBS_da|FBsf0000329665),(TF_binding_site|BDTNP1_TFBS_dl|FBsf0000312450),(TF_binding_site|BDTNP1_TFBS_Med|FBsf0000285751),(TF_binding_site|BDTNP1_TFBS_twi|FBsf0000265337),(TF_binding_site|mE1_TFBS_HSA|FBsf0000372640),(TF_binding_site|mE1_TFBS_HSA|FBsf0000372641),(TF_binding_site|mE1_TFBS_inv|FBsf0000237305),(TF_binding_site|mE1_TFBS_Trl|FBsf0000341272)
3R_13135187_SNP	T	C	C	0.06329	10	148	-0.158	4.943e-06	1.02468e-05	-0.1428	0.0001955	0.000405501	-0.1504	1.173e-05	2.92054e-05	-0.01525	0.5408	0.532045	SiteClass[|||],TranscriptAnnot[INTERGENIC(MODIFIER|||||||||)]	-
2L_14123544_SNP	C	T	C	0.05988	10	157	-0.1645	5.077e-06	1.03979e-05	-0.1305	0.001191	0.00241293	-0.1475	4.577e-05	0.000198656	-0.03393	0.1683	0.162612	SiteClass[|||],TranscriptAnnot[INTERGENIC(MODIFIER|||||||||)]	-
3R_2908857_SNP	G	C	C	0.05031	8	151	-0.1605	9.845e-05	9.28721e-05	-0.2111	1.486e-06	1.04799e-05	-0.1858	4.772e-06	1.57137e-05	0.05054	0.04672	0.0609152	SiteClass[FBgn0037469|Dpck|NON_SYNONYMOUS_CODING|0;FBgn0037470|CG1091|DOWNSTREAM|90],TranscriptAnnot[DOWNSTREAM(MODIFIER||||505|CG1091|protein_coding|CODING|FBtr0081641|);DOWNSTREAM(MODIFIER||||560|CG1091|protein_coding|CODING|FBtr0081640|);DOWNSTREAM(MODIFIER||||563|CG1091|protein_coding|CODING|FBtr0333326|);NON_SYNONYMOUS_CODING(MODERATE|MISSENSE|Cag/Gag|Q235E|236|Dpck|protein_coding|CODING|FBt…	(TF_binding_site|mE1_TFBS_sens|FBsf0000230560)
X_15223235_SNP	A	G	G	0.08284	14	155	-0.1363	9.35e-06	1.20606e-05	-0.1506	8.492e-06	3.75986e-05	-0.1435	2.704e-06	1.07758e-05	0.01422	0.4982	0.494978	SiteClass[FBgn0015926|dah|SYNONYMOUS_CODING|0],TranscriptAnnot[SYNONYMOUS_CODING(LOW|SILENT|gaG/gaA|E210|646|dah|protein_coding|CODING|FBtr0330404|);SYNONYMOUS_CODING(LOW|SILENT|gaG/gaA|E213|649|dah|protein_coding|CODING|FBtr0074007|)]	(TF_binding_site|mE1_TFBS_chinmo|FBsf0000208951),(TF_binding_site|mE1_TFBS_HSA|FBsf0000348093),(TF_binding_site|mE1_TFBS_sens|FBsf0000220964)
X_15211181_SNP	A	G	G	0.07831	13	153	-0.1458	4.78e-06	1.08593e-05	-0.1609	3.552e-06	3.76645e-05	-0.1534	1.123e-06	1.25104e-05	0.01509	0.4874	0.484203	SiteClass[FBgn0261703|gce|SYNONYMOUS_CODING|0],TranscriptAnnot[SYNONYMOUS_CODING(LOW|SILENT|gcG/gcA|A834|918|gce|protein_coding|CODING|FBtr0310309|);SYNONYMOUS_CODING(LOW|SILENT|gcG/gcA|A834|959|gce|protein_coding|CODING|FBtr0303198|);SYNONYMOUS_CODING(LOW|SILENT|gcG/gcA|A834|959|gce|protein_coding|CODING|FBtr0303199|);SYNONYMOUS_CODING(LOW|SILENT|gcG/gcA|A834|959|gce|protein_coding|CODING|FBtr03…	(TF_binding_site|BDTNP1_TFBS_sna|FBsf0000270296),(TF_binding_site|mE1_TFBS_cad|FBsf0000243442)
3R_19143743_SNP	G	T	T	0.09938	16	145	-0.131	4.254e-06	1.08726e-05	-0.1008	0.001656	0.00309366	-0.1159	5.007e-05	0.000156079	-0.03018	0.1359	0.123937	SiteClass[FBgn0003118|pnt|INTRON|0],TranscriptAnnot[INTRON(MODIFIER||||718|pnt|protein_coding|CODING|FBtr0089717|3)]	-
3R_24135867_SNP	C	G	C	0.15	24	136	-0.1069	4.724e-06	1.09502e-05	-0.08987	0.0007474	0.000908016	-0.0984	3.168e-05	5.90728e-05	-0.01706	0.3044	0.301731	SiteClass[|||],TranscriptAnnot[INTERGENIC(MODIFIER|||||||||)]	(TF_binding_site|mE1_TFBS_bab1|FBsf0000214855)
3R_9077232_SNP	C	G	G	0.2025	33	130	-0.09817	4.609e-06	1.1074e-05	-0.08108	0.0007748	0.00380873	-0.08963	3.338e-05	0.000259992	-0.01709	0.244	0.239649	SiteClass[FBgn0000024|Ace|INTRON|0],TranscriptAnnot[INTRON(MODIFIER||||636|Ace|protein_coding|CODING|FBtr0335223|1);INTRON(MODIFIER||||649|Ace|protein_coding|CODING|FBtr0082780|1);INTRON(MODIFIER||||649|Ace|protein_coding|CODING|FBtr0300486|2)]	-
2L_4116533_SNP	T	C	C	0.3007	46	107	-0.08617	6.085e-06	1.11582e-05	-0.09194	7.427e-06	5.81203e-05	-0.08906	2.042e-06	1.30856e-05	0.005765	0.6495	0.661582	SiteClass[FBgn0000547|ed|DOWNSTREAM|784],TranscriptAnnot[DOWNSTREAM(MODIFIER||||1332|ed|protein_coding|CODING|FBtr0334265|);INTERGENIC(MODIFIER|||||||||)]	(TF_binding_site|BDTNP1_TFBS_da|FBsf0000321360),(TF_binding_site|mE1_TFBS_cad|FBsf0000241299),(TF_binding_site|mE1_TFBS_HSA|FBsf0000345181)
3R_5555206_SNP	A	G	G	0.1091	18	147	-0.1266	5.064e-06	1.12411e-05	-0.1357	8.989e-06	7.5737e-05	-0.1312	2.017e-06	1.84192e-05	0.009117	0.6312	0.624979	SiteClass[FBgn0262477|FoxP|UPSTREAM|41],TranscriptAnnot[INTERGENIC(MODIFIER|||||||||);UPSTREAM(MODIFIER||||442|FoxP|protein_coding|CODING|FBtr0329937|);UPSTREAM(MODIFIER||||520|FoxP|protein_coding|CODING|FBtr0304869|)]	(TF_binding_site|BDTNP1_TFBS_dl|FBsf0000310767),(TF_binding_site|BDTNP1_TFBS_twi|FBsf0000264612),(TF_binding_site|mE1_TFBS_HSA|FBsf0000370034)
2L_4406002_DEL	C	CATGTTC	CATGTTC	0.06329	10	148	-0.1642	5.903e-06	1.13466e-05	-0.1038	0.0103	0.0186262	-0.134	0.0002262	0.000691338	-0.06043	0.01525	0.0124751	SiteClass[FBgn0031602|CG15431|UTR_3_PRIME|0],TranscriptAnnot[UTR_3_PRIME(MODIFIER||||1026|CG15431|protein_coding|CODING|FBtr0077459|5);UTR_3_PRIME(MODIFIER||||1026|CG15431|protein_coding|CODING|FBtr0331436|4)]	(TF_binding_site|mE1_TFBS_cad|FBsf0000241319)
2R_9659763_SNP	T	A	A	0.05988	10	157	-0.1414	9.989e-05	0.000218088	-0.1887	1.642e-06	1.15371e-05	-0.165	4.253e-06	3.13076e-05	0.04736	0.05083	0.0506367	SiteClass[FBgn0033867|Cpr50Ca|INTRON|0],TranscriptAnnot[INTRON(MODIFIER||||815|Cpr50Ca|protein_coding|CODING|FBtr0087629|2)]	-
3R_11983403_SNP	G	C	C	0.4091	63	91	-0.08468	3.162e-06	1.15738e-05	-0.08009	6.463e-05	0.000684953	-0.08238	5.747e-06	8.16196e-05	-0.004588	0.7024	0.707871	SiteClass[FBgn0063649|CG6006|INTRON|0],TranscriptAnnot[INTRON(MODIFIER||||603|CG6006|protein_coding|CODING|FBtr0113477|1);UPSTREAM(MODIFIER||||569|CG6006|protein_coding|CODING|FBtr0083252|);UPSTREAM(MODIFIER||||569|CG6006|protein_coding|CODING|FBtr0309301|);UPSTREAM(MODIFIER||||569|CG6006|protein_coding|CODING|FBtr0309302|);UPSTREAM(MODIFIER||||569|CG6006|protein_coding|CODING|FBtr0309303|)]	-
3R_13357769_SNP	T	G	G	0.06627	11	155	-0.1551	7.504e-06	1.1737e-05	-0.1133	0.00348	0.00773647	-0.1342	0.000116	0.000365037	-0.04184	0.07611	0.0713712	SiteClass[FBgn0038515|CG5823|DOWNSTREAM|278],TranscriptAnnot[DOWNSTREAM(MODIFIER||||283|CG5823|protein_coding|CODING|FBtr0083505|);DOWNSTREAM(MODIFIER||||283|CG5823|protein_coding|CODING|FBtr0321266|);INTERGENIC(MODIFIER|||||||||)]	-
2R_2358071_SNP	C	T	T	0.06173	10	152	-0.1273	0.0005558	0.000565476	-0.1778	8.26e-06	1.20554e-05	-0.1526	2.716e-05	4.03593e-05	0.05053	0.04134	0.0370915	SiteClass[|||],TranscriptAnnot[INTERGENIC(MODIFIER|||||||||)]	(transposable_element|FlyBase|FBti0059703),(transposable_element|FlyBase|FBti0059778)
3R_10514700_SNP	C	T	T	0.1104	18	145	-0.1144	4.618e-05	4.30499e-05	-0.1325	1.578e-05	2.22117e-05	-0.1235	9.342e-06	1.21219e-05	0.01806	0.339	0.332846	SiteClass[FBgn0265140|Meltrin|INTRON|0],TranscriptAnnot[INTRON(MODIFIER||||1407|Meltrin|protein_coding|CODING|FBtr0301498|1);INTRON(MODIFIER||||975|Meltrin|protein_coding|CODING|FBtr0301499|1)]	(TF_binding_site|BDTNP1_TFBS_twi|FBsf0000265014)
2L_14023823_INS	GCG	G	G	0.05488	9	155	-0.008051	0.8376	0.794352	-0.117	0.005242	0.0156694	-0.06254	0.1067	0.114936	0.109	6.903e-06	1.21301e-05	SiteClass[|||],TranscriptAnnot[INTERGENIC(MODIFIER|||||||||)]	(TF_binding_site|BDTNP1_TFBS_da|FBsf0000322377),(TF_binding_site|BDTNP1_TFBS_dl|FBsf0000298568),(TF_binding_site|BDTNP1_TFBS_twi|FBsf0000201667),(TF_binding_site|BDTNP1_TFBS_z|FBsf0000196198),(TF_binding_site|mE1_TFBS_cnc|FBsf0000206258),(TF_binding_site|mE1_TFBS_HSA|FBsf0000350978),(TF_binding_site|mE1_TFBS_Trl|FBsf0000337607)
3R_13226604_DEL	A	AGCTTTCAGC	AGCTTTCAGC	0.06211	10	151	-0.1607	5.75e-06	1.21569e-05	-0.1292	0.001537	0.00248517	-0.1449	6.404e-05	0.000135831	-0.03152	0.19	0.195289	SiteClass[FBgn0038504|Sur-8|INTRON|0],TranscriptAnnot[INTRON(MODIFIER||||641|Sur-8|protein_coding|CODING|FBtr0083447|1);INTRON(MODIFIER||||641|Sur-8|protein_coding|CODING|FBtr0083448|1);INTRON(MODIFIER||||641|Sur-8|protein_coding|CODING|FBtr0339532|1);INTRON(MODIFIER||||694|Sur-8|protein_coding|CODING|FBtr0339531|1)]	(TF_binding_site|BDTNP1_TFBS_dl|FBsf0000312413),(TF_binding_site|BDTNP1_TFBS_Med|FBsf0000285733),(TF_binding_site|BDTNP1_TFBS_twi|FBsf0000265319),(TF_binding_site|mE1_TFBS_D|FBsf0000240023),(TF_binding_site|mE1_TFBS_disco|FBsf0000260862),(TF_binding_site|mE1_TFBS_HSA|FBsf0000372583),(TF_binding_site|mE1_TFBS_HSA|FBsf0000372584)
2R_9389928_SNP	G	A	G	0.2883	47	116	-0.081	2.037e-05	3.73318e-05	-0.09162	1.141e-05	2.51141e-05	-0.08631	4.603e-06	1.24292e-05	0.01062	0.4221	0.410506	SiteClass[FBgn0004638|drk|INTRON|0;FBgn0033845|mars|UPSTREAM|152],TranscriptAnnot[INTRON(MODIFIER||||211|drk|protein_coding|CODING|FBtr0087693|1);INTRON(MODIFIER||||211|drk|protein_coding|CODING|FBtr0087694|1);INTRON(MODIFIER||||211|drk|protein_coding|CODING|FBtr0087695|1);INTRON(MODIFIER||||211|drk|protein_coding|CODING|FBtr0087696|1);INTRON(MODIFIER||||211|drk|protein_coding|CODING|FBtr0087697|…	(TF_binding_site|BDTNP1_TFBS_da|FBsf0000324116),(TF_binding_site|BDTNP1_TFBS_dl|FBsf0000301890),(TF_binding_site|BDTNP1_TFBS_Med|FBsf0000280213),(TF_binding_site|BDTNP1_TFBS_prd|FBsf0000274399),(TF_binding_site|BDTNP1_TFBS_twi|FBsf0000199269),(TF_binding_site|mE1_TFBS_cad|FBsf0000246553),(TF_binding_site|mE1_TFBS_D|FBsf0000240611),(TF_binding_site|mE1_TFBS_HSA|FBsf0000356359),(TF_binding_site|mE1…
2R_13339191_SNP	G	A	A	0.09259	15	147	-0.124	1.896e-05	2.8564e-05	-0.1414	1.348e-05	3.78355e-05	-0.1327	4.742e-06	1.25503e-05	0.0174	0.4003	0.389844	SiteClass[FBgn0028956|mthl3|INTRON|0],TranscriptAnnot[INTRON(MODIFIER||||511|mthl3|protein_coding|CODING|FBtr0086955|1)]	(transposable_element|FlyBase|FBti0064271)
3L_6889532_SNP	T	C	C	0.2866	47	117	-0.06739	0.0004954	0.000370492	-0.09394	8.729e-06	1.26072e-05	-0.08066	2.626e-05	2.50858e-05	0.02654	0.04079	0.0384333	SiteClass[|||],TranscriptAnnot[INTERGENIC(MODIFIER|||||||||)]	-
3L_6889533_SNP	T	C	C	0.2866	47	117	-0.06739	0.0004954	0.000370492	-0.09394	8.729e-06	1.26072e-05	-0.08066	2.626e-05	2.50858e-05	0.02654	0.04079	0.0384333	SiteClass[|||],TranscriptAnnot[INTERGENIC(MODIFIER|||||||||)]	-
3L_12007005_DEL	A	ATAGAAAGCCTGA	ATAGAAAGCCTGA	0.2547	41	120	-0.07587	0.0001995	0.000304679	-0.1002	6.353e-06	1.27358e-05	-0.08804	1.255e-05	3.49414e-05	0.02434	0.07931	0.0703748	SiteClass[FBgn0041096|rols|INTRON|0],TranscriptAnnot[INTRON(MODIFIER||||1568|rols|protein_coding|CODING|FBtr0334109|4);INTRON(MODIFIER||||1569|rols|protein_coding|CODING|FBtr0076054|3);INTRON(MODIFIER||||1569|rols|protein_coding|CODING|FBtr0076056|4);INTRON(MODIFIER||||1669|rols|protein_coding|CODING|FBtr0310009|4);INTRON(MODIFIER||||1670|rols|protein_coding|CODING|FBtr0076055|4);INTRON(MODIFIER|…	-
X_11535100_SNP	C	A	A	0.179	29	133	-0.1016	9.799e-06	1.28007e-05	-0.08971	0.0004393	0.0017647	-0.09568	3.131e-05	0.000157227	-0.01194	0.4478	0.435308	SiteClass[FBgn0004370|Ptp10D|INTRON|0],TranscriptAnnot[INTRON(MODIFIER||||1558|Ptp10D|protein_coding|CODING|FBtr0273235|2);INTRON(MODIFIER||||1558|Ptp10D|protein_coding|CODING|FBtr0331406|3);INTRON(MODIFIER||||1631|Ptp10D|protein_coding|CODING|FBtr0073522|2);INTRON(MODIFIER||||1653|Ptp10D|protein_coding|CODING|FBtr0330394|2);INTRON(MODIFIER||||1990|Ptp10D|protein_coding|CODING|FBtr0330392|2);INTR…	(TF_binding_site|BDTNP1_TFBS_dl|FBsf0000318415),(TF_binding_site|mE1_TFBS_HSA|FBsf0000381569)
2R_2389927_SNP	T	C	C	0.05625	9	151	-0.1406	0.0002931	0.000301026	-0.1892	4.014e-06	1.34198e-05	-0.1649	1.409e-05	3.28381e-05	0.04855	0.05022	0.056918	SiteClass[FBgn0086655|jing|UTR_5_PRIME|0],TranscriptAnnot[UTR_5_PRIME(MODIFIER||||1744|jing|protein_coding|CODING|FBtr0114365|1);UTR_5_PRIME(MODIFIER||||217|jing|protein_coding|CODING|FBtr0114362|1)]	(silencer|mE1_HDAC_PRE|FBsf0000343421),(TF_binding_site|BDTNP1_TFBS_dl|FBsf0000300209),(TF_binding_site|mE1_TFBS_HSA|FBsf0000353770),(TF_binding_site|mE1_TFBS_Trl|FBsf0000337985)
3L_13580744_SNP	G	A	A	0.1043	17	146	-0.1275	6.542e-06	1.36902e-05	-0.118	0.0001734	0.000388544	-0.1228	1.384e-05	4.88726e-05	-0.009536	0.6267	0.618354	SiteClass[FBgn0264001|bru-3|INTRON|0],TranscriptAnnot[INTRON(MODIFIER||||331|bru-3|protein_coding|CODING|FBtr0330348|3);INTRON(MODIFIER||||337|bru-3|protein_coding|CODING|FBtr0330346|3);INTRON(MODIFIER||||345|bru-3|protein_coding|CODING|FBtr0330350|3);INTRON(MODIFIER||||363|bru-3|protein_coding|CODING|FBtr0330347|3);INTRON(MODIFIER||||370|bru-3|protein_coding|CODING|FBtr0330355|3);INTRON(MODIFIER…	(TF_binding_site|mE1_TFBS_chinmo|FBsf0000210209),(TF_binding_site|mE1_TFBS_HSA|FBsf0000364945)
X_15209832_SNP	G	T	T	0.09036	15	151	-0.1329	9.827e-06	2.69748e-05	-0.1566	1.923e-06	1.52891e-05	-0.1448	1.187e-06	1.37038e-05	0.02367	0.2475	0.241041	SiteClass[FBgn0261703|gce|SYNONYMOUS_CODING|0],TranscriptAnnot[SYNONYMOUS_CODING(LOW|SILENT|gcT/gcG|A454|918|gce|protein_coding|CODING|FBtr0310309|);SYNONYMOUS_CODING(LOW|SILENT|gcT/gcG|A454|959|gce|protein_coding|CODING|FBtr0303198|);SYNONYMOUS_CODING(LOW|SILENT|gcT/gcG|A454|959|gce|protein_coding|CODING|FBtr0303199|);SYNONYMOUS_CODING(LOW|SILENT|gcT/gcG|A454|959|gce|protein_coding|CODING|FBtr03…	-
3R_13161280_INS	GGATCG	G	G	0.331	48	97	-0.08905	8.583e-06	1.39825e-05	-0.06695	0.003028	0.011059	-0.078	0.0001124	0.000494292	-0.0221	0.1082	0.092353	SiteClass[FBgn0038498|beat-IIa|INTRON|0],TranscriptAnnot[INTRON(MODIFIER||||431|beat-IIa|protein_coding|CODING|FBtr0083453|2);INTRON(MODIFIER||||431|beat-IIa|protein_coding|CODING|FBtr0339170|1)]	-
3L_1365534_SNP	T	A	T	0.3758	62	103	-0.06233	0.0005575	0.000569378	-0.08966	4.608e-06	1.41196e-05	-0.07599	2.012e-05	6.0512e-05	0.02733	0.02434	0.0218369	SiteClass[FBgn0003138|Ptp61F|INTRON|0],TranscriptAnnot[INTRON(MODIFIER||||431|Ptp61F|protein_coding|CODING|FBtr0310161|3);INTRON(MODIFIER||||530|Ptp61F|protein_coding|CODING|FBtr0072716|1)]	(TF_binding_site|BDTNP1_TFBS_dl|FBsf0000304973)
X_15210134_SNP	A	T	T	0.08485	14	151	-0.1352	1.356e-05	2.58822e-05	-0.1568	3.738e-06	2.1399e-05	-0.146	2.043e-06	1.41616e-05	0.02162	0.3074	0.299491	SiteClass[FBgn0261703|gce|INTRON|0],TranscriptAnnot[INTRON(MODIFIER||||918|gce|protein_coding|CODING|FBtr0310309|6);INTRON(MODIFIER||||959|gce|protein_coding|CODING|FBtr0303198|6);INTRON(MODIFIER||||959|gce|protein_coding|CODING|FBtr0303199|6);INTRON(MODIFIER||||959|gce|protein_coding|CODING|FBtr0310308|6);INTRON(MODIFIER||||959|gce|protein_coding|CODING|FBtr0331765|5);INTRON(MODIFIER||||959|gce|…	(TF_binding_site|mE1_TFBS_cad|FBsf0000243442)
2R_7983768_DEL	T	TT	TT	0.1513	23	129	-0.1049	3.979e-05	3.51126e-05	-0.1212	1.139e-05	3.75813e-05	-0.1131	7.062e-06	1.42446e-05	0.01625	0.3439	0.335946	SiteClass[FBgn0086677|jeb|INTRON|0],TranscriptAnnot[INTRON(MODIFIER||||560|jeb|protein_coding|CODING|FBtr0088021|1);INTRON(MODIFIER||||560|jeb|protein_coding|CODING|FBtr0333065|1)]	-
2L_17815065_SNP	C	G	G	0.08125	13	147	-0.1398	5.206e-06	1.43337e-05	-0.09086	0.008829	0.0218375	-0.1153	0.0001897	0.000593753	-0.04891	0.02439	0.0226309	SiteClass[FBgn0262018|CadN2|INTRON|0],TranscriptAnnot[INTRON(MODIFIER||||1799|CadN2|protein_coding|CODING|FBtr0303836|3);INTRON(MODIFIER||||1799|CadN2|protein_coding|CODING|FBtr0308770|4)]	-
2R_9391767_SNP	G	C	C	0.1463	24	140	-0.1079	4.041e-06	1.44619e-05	-0.1045	7.961e-05	0.000192272	-0.1062	6.461e-06	2.9035e-05	-0.00344	0.8374	0.834892	SiteClass[FBgn0033845|mars|NON_SYNONYMOUS_CODING|0],TranscriptAnnot[NON_SYNONYMOUS_CODING(MODERATE|MISSENSE|gaC/gaG|D409E|921|mars|protein_coding|CODING|FBtr0087668|);NON_SYNONYMOUS_CODING(MODERATE|MISSENSE|gaC/gaG|D409E|921|mars|protein_coding|CODING|FBtr0301387|)]	(TF_binding_site|mE1_TFBS_cad|FBsf0000246553),(TF_binding_site|mE1_TFBS_sens|FBsf0000227816)
3R_1571778_SNP	C	A	A	0.0679	11	151	-0.1473	2.685e-05	3.57309e-05	-0.1689	1.044e-05	2.43802e-05	-0.1581	5.393e-06	1.4668e-05	0.02164	0.3628	0.353008	SiteClass[FBgn0027497|Madm|UTR_3_PRIME|0],TranscriptAnnot[UTR_3_PRIME(MODIFIER||||637|Madm|protein_coding|CODING|FBtr0078722|2)]	-
X_15224104_SNP	T	C	C	0.07738	13	155	-0.1381	1.021e-05	3.07729e-05	-0.1601	3.445e-06	2.04776e-05	-0.1491	1.605e-06	1.50295e-05	0.02201	0.3119	0.306951	SiteClass[FBgn0015926|dah|INTRON|0;FBgn0030628|CG9114|DOWNSTREAM|713],TranscriptAnnot[DOWNSTREAM(MODIFIER||||619|CG9114|protein_coding|CODING|FBtr0074020|);INTRON(MODIFIER||||646|dah|protein_coding|CODING|FBtr0330404|4);INTRON(MODIFIER||||649|dah|protein_coding|CODING|FBtr0074007|4)]	(TF_binding_site|mE1_TFBS_chinmo|FBsf0000208951)
2R_9390389_SNP	C	A	C	0.2981	48	113	-0.07778	4.365e-05	5.93532e-05	-0.08966	1.84e-05	2.35794e-05	-0.08372	9.201e-06	1.53447e-05	0.01188	0.3693	0.35548	SiteClass[FBgn0033845|mars|UTR_5_PRIME|0;FBgn0004638|drk|UPSTREAM|43],TranscriptAnnot[UPSTREAM(MODIFIER||||211|drk|protein_coding|CODING|FBtr0087693|);UPSTREAM(MODIFIER||||211|drk|protein_coding|CODING|FBtr0087694|);UPSTREAM(MODIFIER||||211|drk|protein_coding|CODING|FBtr0087695|);UPSTREAM(MODIFIER||||211|drk|protein_coding|CODING|FBtr0087696|);UPSTREAM(MODIFIER||||211|drk|protein_coding|CODING|FB…	(TF_binding_site|BDTNP1_TFBS_da|FBsf0000324117),(TF_binding_site|BDTNP1_TFBS_Med|FBsf0000280213),(TF_binding_site|BDTNP1_TFBS_prd|FBsf0000274399),(TF_binding_site|BDTNP1_TFBS_twi|FBsf0000199269),(TF_binding_site|mE1_TFBS_cad|FBsf0000246553),(TF_binding_site|mE1_TFBS_D|FBsf0000240611),(TF_binding_site|mE1_TFBS_disco|FBsf0000259726),(TF_binding_site|mE1_TFBS_HSA|FBsf0000356359),(TF_binding_site|mE1…
3L_1365548_SNP	T	A	T	0.3735	62	104	-0.05657	0.00174	0.00145908	-0.08689	8.6e-06	1.58402e-05	-0.07173	5.698e-05	0.000100551	0.03031	0.01184	0.010678	SiteClass[FBgn0003138|Ptp61F|INTRON|0],TranscriptAnnot[INTRON(MODIFIER||||431|Ptp61F|protein_coding|CODING|FBtr0310161|3);INTRON(MODIFIER||||530|Ptp61F|protein_coding|CODING|FBtr0072716|1)]	(TF_binding_site|BDTNP1_TFBS_dl|FBsf0000304973)
2L_3386900_SNP	G	T	T	0.06211	10	151	-0.1606	8.422e-06	1.61412e-05	-0.1299	0.001163	0.00342276	-0.1452	5.649e-05	0.000241466	-0.03068	0.2088	0.207531	SiteClass[FBgn0259949|Sfp23F|DOWNSTREAM|454;FBgn0259950|CG42460|DOWNSTREAM|998],TranscriptAnnot[DOWNSTREAM(MODIFIER||||78|Sfp23F|protein_coding|CODING|FBtr0300295|);DOWNSTREAM(MODIFIER||||79|CG42460|protein_coding|CODING|FBtr0300294|);INTERGENIC(MODIFIER|||||||||)]	-
3L_1365536_SNP	T	A	T	0.3795	63	103	-0.06013	0.0008209	0.000767898	-0.08725	7.46e-06	1.61464e-05	-0.07369	3.287e-05	7.38385e-05	0.02712	0.02428	0.0221832	SiteClass[FBgn0003138|Ptp61F|INTRON|0],TranscriptAnnot[INTRON(MODIFIER||||431|Ptp61F|protein_coding|CODING|FBtr0310161|3);INTRON(MODIFIER||||530|Ptp61F|protein_coding|CODING|FBtr0072716|1)]	(TF_binding_site|BDTNP1_TFBS_dl|FBsf0000304973)
3R_9031458_SNP	C	G	G	0.2027	30	118	-0.09928	8.964e-06	1.62453e-05	-0.1018	1.651e-05	0.000183378	-0.1006	4.097e-06	2.99403e-05	0.002567	0.8597	0.866544	SiteClass[|||],TranscriptAnnot[INTERGENIC(MODIFIER|||||||||)]	-
3L_6888971_SNP	A	G	G	0.2275	38	129	-0.06939	0.0008103	0.000707853	-0.0996	9.404e-06	1.66364e-05	-0.08449	3.716e-05	4.68368e-05	0.0302	0.02865	0.0273901	SiteClass[|||],TranscriptAnnot[INTERGENIC(MODIFIER|||||||||)]	-
3R_11587775_DEL	C	CAGAAGATG	CAGAAGATG	0.07273	12	153	-0.1394	3.061e-05	4.98781e-05	-0.1647	6.573e-06	2.1896e-05	-0.1521	4.43e-06	1.71346e-05	0.02527	0.2666	0.258353	SiteClass[|||],TranscriptAnnot[INTERGENIC(MODIFIER|||||||||)]	-
3R_5094049_SNP	T	C	C	0.05422	9	157	-0.1712	6.254e-06	1.73568e-05	-0.1154	0.00551	0.026037	-0.1433	0.0001473	0.00113804	-0.05583	0.02591	0.0281172	SiteClass[FBgn0261241|Vps16A|SYNONYMOUS_CODING|0],TranscriptAnnot[SYNONYMOUS_CODING(LOW|SILENT|agC/agT|S345|833|Vps16A|protein_coding|CODING|FBtr0081979|)]	(TF_binding_site|mE1_TFBS_cad|FBsf0000247968)
3L_3103557_SNP	T	G	G	0.08696	14	147	-0.1317	2.854e-05	2.59551e-05	-0.1474	1.465e-05	4.63476e-05	-0.1396	6.997e-06	1.74905e-05	0.01573	0.4515	0.451323	SiteClass[FBgn0035398|Cht7|INTRON|0],TranscriptAnnot[INTRON(MODIFIER||||1013|Cht7|protein_coding|CODING|FBtr0073124|1)]	-
2L_13908780_SNP	A	T	T	0.07595	12	146	-0.1111	0.0006421	0.00171899	-0.1652	2.414e-06	1.76214e-05	-0.1381	1.492e-05	0.000125662	0.05413	0.01568	0.0149571	SiteClass[FBgn0012037|Ance|SYNONYMOUS_CODING|0;FBgn0032535|Ance-2|UPSTREAM|860],TranscriptAnnot[SYNONYMOUS_CODING(LOW|SILENT|gcT/gcA|A550|615|Ance|protein_coding|CODING|FBtr0080552|);SYNONYMOUS_CODING(LOW|SILENT|gcT/gcA|A550|615|Ance|protein_coding|CODING|FBtr0080553|);UPSTREAM(MODIFIER||||611|Ance-2|protein_coding|CODING|FBtr0080554|)]	(TF_binding_site|mE1_TFBS_cad|FBsf0000242084)
3R_9101514_SNP	C	T	T	0.1341	22	142	-0.1071	2.92e-05	4.0818e-05	-0.1246	8.751e-06	3.31813e-05	-0.1159	5.066e-06	1.79573e-05	0.01753	0.315	0.305123	SiteClass[|||],TranscriptAnnot[INTERGENIC(MODIFIER|||||||||)]	-
3L_8806463_SNP	T	A	A	0.05357	9	159	-0.1365	0.0003543	0.000613801	-0.1882	5.86e-06	2.00684e-05	-0.1623	1.729e-05	7.08385e-05	0.05168	0.04444	0.0422636	SiteClass[|||],TranscriptAnnot[INTERGENIC(MODIFIER|||||||||)]	-
3L_15089201_SNP	T	C	C	0.2484	39	118	-0.08259	6.162e-05	7.01662e-05	-0.1029	5.828e-06	2.53574e-05	-0.09274	6.19e-06	2.18963e-05	0.02029	0.1474	0.140141	SiteClass[FBgn0027088|Aats-gly|SYNONYMOUS_CODING|0],TranscriptAnnot[SYNONYMOUS_CODING(LOW|SILENT|ggC/ggT|G194|679|Aats-gly|protein_coding|CODING|FBtr0075632|);SYNONYMOUS_CODING(LOW|SILENT|ggC/ggT|G280|765|Aats-gly|protein_coding|CODING|FBtr0075633|);SYNONYMOUS_CODING(LOW|SILENT|ggC/ggT|G280|765|Aats-gly|protein_coding|CODING|FBtr0333934|)]	(TF_binding_site|mE1_TFBS_HSA|FBsf0000365399),(TF_binding_site|mE1_TFBS_sens|FBsf0000224543)
2L_9088933_SNP	T	C	C	0.06024	10	156	-0.1457	6.139e-05	8.38769e-05	-0.1744	8.49e-06	3.10078e-05	-0.16	8.808e-06	2.39746e-05	0.02871	0.21	0.237837	SiteClass[FBgn0032095|Toll-4|SYNONYMOUS_CODING|0],TranscriptAnnot[SYNONYMOUS_CODING(LOW|SILENT|caC/caT|H957|1125|Toll-4|protein_coding|CODING|FBtr0079768|)]	(TF_binding_site|BDTNP1_TFBS_da|FBsf0000322003),(TF_binding_site|BDTNP1_TFBS_twi|FBsf0000201296),(TF_binding_site|mE1_TFBS_HSA|FBsf0000346981)
3R_9068054_SNP	C	T	T	0.4371	66	85	-0.07651	4.585e-05	6.68e-05	-0.0946	3.635e-06	3.06821e-05	-0.08556	4.192e-06	2.61257e-05	0.01809	0.148	0.138736	SiteClass[FBgn0000024|Ace|INTRON|0],TranscriptAnnot[INTRON(MODIFIER||||636|Ace|protein_coding|CODING|FBtr0335223|5);INTRON(MODIFIER||||649|Ace|protein_coding|CODING|FBtr0082780|5);INTRON(MODIFIER||||649|Ace|protein_coding|CODING|FBtr0300486|6)]	-
2R_7347843_SNP	T	G	G	0.05488	9	155	-0.1389	0.0003085	0.000596937	-0.1861	9.401e-06	2.68915e-05	-0.1625	2.025e-05	9.29807e-05	0.04719	0.06998	0.0641429	SiteClass[FBgn0000581|E(Pc)|INTRON|0],TranscriptAnnot[INTRON(MODIFIER||||1974|E_Pc_|protein_coding|CODING|FBtr0330621|9);INTRON(MODIFIER||||2023|E_Pc_|protein_coding|CODING|FBtr0088139|10);INTRON(MODIFIER||||2023|E_Pc_|protein_coding|CODING|FBtr0088140|10);INTRON(MODIFIER||||2033|E_Pc_|protein_coding|CODING|FBtr0330622|10);INTRON(MODIFIER||||2033|E_Pc_|protein_coding|CODING|FBtr0330623|10)]	(TF_binding_site|BDTNP1_TFBS_sna|FBsf0000267645),(TF_binding_site|mE1_TFBS_cad|FBsf0000246358),(TF_binding_site|mE1_TFBS_HSA|FBsf0000355628)
2R_7347852_INS	TGTGCTT	T	T	0.05488	9	155	-0.1389	0.0003085	0.000596937	-0.1861	9.401e-06	2.68915e-05	-0.1625	2.025e-05	9.29807e-05	0.04719	0.06998	0.0641429	SiteClass[FBgn0000581|E(Pc)|INTRON|0],TranscriptAnnot[INTRON(MODIFIER||||1974|E_Pc_|protein_coding|CODING|FBtr0330621|9);INTRON(MODIFIER||||2023|E_Pc_|protein_coding|CODING|FBtr0088139|10);INTRON(MODIFIER||||2023|E_Pc_|protein_coding|CODING|FBtr0088140|10);INTRON(MODIFIER||||2033|E_Pc_|protein_coding|CODING|FBtr0330622|10);INTRON(MODIFIER||||2033|E_Pc_|protein_coding|CODING|FBtr0330623|10)]	(TF_binding_site|BDTNP1_TFBS_sna|FBsf0000267645),(TF_binding_site|mE1_TFBS_cad|FBsf0000246358),(TF_binding_site|mE1_TFBS_HSA|FBsf0000355628)
X_15233041_INS	AGAA	A	A	0.06211	10	151	-0.1427	5.117e-05	0.000146993	-0.1739	6.137e-06	2.82689e-05	-0.1583	5.289e-06	4.41915e-05	0.03118	0.205	0.200226	SiteClass[FBgn0026428|HDAC6|INTRON|0],TranscriptAnnot[INTRON(MODIFIER||||1108|HDAC6|protein_coding|CODING|FBtr0307383|8);INTRON(MODIFIER||||1128|HDAC6|protein_coding|CODING|FBtr0074008|8);INTRON(MODIFIER||||1135|HDAC6|protein_coding|CODING|FBtr0074010|8);INTRON(MODIFIER||||1138|HDAC6|protein_coding|CODING|FBtr0074009|7);INTRON(MODIFIER||||1179|HDAC6|protein_coding|CODING|FBtr0330405|8);INTRON(MOD…	-
2L_19995025_SNP	A	G	G	0.0875	14	146	-0.102	0.001077	0.0015838	-0.1499	7.373e-06	2.82907e-05	-0.126	3.902e-05	0.000127661	0.04789	0.02135	0.0209445	SiteClass[FBgn0264443|CG43861|INTRON|0],TranscriptAnnot[INTRON(MODIFIER||||422|CG43861|protein_coding|CODING|FBtr0332565|2);INTRON(MODIFIER||||470|CG43861|protein_coding|CODING|FBtr0332564|2);INTRON(MODIFIER||||568|CG43861|protein_coding|CODING|FBtr0332566|2)]	-
3L_6888627_SNP	T	G	G	0.1091	18	147	-0.08161	0.003452	0.00469555	-0.1371	6.829e-06	2.8637e-05	-0.1093	7.988e-05	0.000256372	0.05544	0.002696	0.00260189	SiteClass[|||],TranscriptAnnot[INTERGENIC(MODIFIER|||||||||)]	-
3L_6880634_SNP	C	T	T	0.1333	22	143	-0.08087	0.001774	0.00201188	-0.1251	7.721e-06	2.87551e-05	-0.103	5.51e-05	0.000151716	0.04427	0.009954	0.00895893	SiteClass[|||],TranscriptAnnot[INTERGENIC(MODIFIER|||||||||)]	-
2R_8443466_SNP	T	C	C	0.1266	20	138	-0.08178	0.002921	0.00464315	-0.1309	9.079e-06	2.94405e-05	-0.1063	8.218e-05	0.000299939	0.04912	0.007165	0.0054503	SiteClass[FBgn0011592|fra|INTRON|0],TranscriptAnnot[INTRON(MODIFIER||||1375|fra|protein_coding|CODING|FBtr0087821|1);INTRON(MODIFIER||||1517|fra|protein_coding|CODING|FBtr0339649|1);INTRON(MODIFIER||||1526|fra|protein_coding|CODING|FBtr0087822|1)]	-
X_15210135_SNP	A	C	C	0.07317	12	152	-0.1383	2.49e-05	6.78669e-05	-0.1643	4.942e-06	3.34073e-05	-0.1513	3.196e-06	3.0102e-05	0.02599	0.2544	0.24518	SiteClass[FBgn0261703|gce|INTRON|0],TranscriptAnnot[INTRON(MODIFIER||||918|gce|protein_coding|CODING|FBtr0310309|6);INTRON(MODIFIER||||959|gce|protein_coding|CODING|FBtr0303198|6);INTRON(MODIFIER||||959|gce|protein_coding|CODING|FBtr0303199|6);INTRON(MODIFIER||||959|gce|protein_coding|CODING|FBtr0310308|6);INTRON(MODIFIER||||959|gce|protein_coding|CODING|FBtr0331765|5);INTRON(MODIFIER||||959|gce|…	(TF_binding_site|mE1_TFBS_cad|FBsf0000243442)
X_14400023_SNP	C	T	T	0.0566	9	150	-0.1651	8.823e-06	3.10543e-05	-0.1401	0.0008561	0.00258984	-0.1526	4.575e-05	0.000290618	-0.02496	0.3408	0.329748	SiteClass[|||],TranscriptAnnot[INTERGENIC(MODIFIER|||||||||)]	-
3L_20343288_DEL	AA	A	AA	0.05063	8	150	-0.1451	0.0004058	0.00115577	-0.2035	6.285e-06	3.13885e-05	-0.1743	2.06e-05	0.000201792	0.05839	0.03012	0.0300968	SiteClass[FBgn0036974|eRF1|INTRON|0],TranscriptAnnot[INTRON(MODIFIER||||437|eRF1|protein_coding|CODING|FBtr0331817|2);INTRON(MODIFIER||||438|eRF1|protein_coding|CODING|FBtr0078173|2);INTRON(MODIFIER||||438|eRF1|protein_coding|CODING|FBtr0078174|2);INTRON(MODIFIER||||438|eRF1|protein_coding|CODING|FBtr0078175|2);INTRON(MODIFIER||||438|eRF1|protein_coding|CODING|FBtr0078176|2);INTRON(MODIFIER||||43…	(TF_binding_site|BDTNP1_TFBS_dl|FBsf0000308754),(TF_binding_site|mE1_TFBS_Trl|FBsf0000340360)
3L_6879050_SNP	T	C	C	0.1024	17	149	-0.09342	0.001127	0.00154184	-0.1399	7.469e-06	3.22608e-05	-0.1166	4.075e-05	0.000146683	0.04643	0.01479	0.0143301	SiteClass[|||],TranscriptAnnot[INTERGENIC(MODIFIER|||||||||)]	-
3R_10005366_SNP	A	G	G	0.07595	12	146	-0.1407	2.704e-05	4.27612e-05	-0.1547	2.09e-05	7.5245e-05	-0.1477	8.924e-06	3.23431e-05	0.01395	0.5188	0.533836	SiteClass[FBgn0011582|DopR|INTRON|0],TranscriptAnnot[INTRON(MODIFIER||||481|DopR|protein_coding|CODING|FBtr0301351|5);INTRON(MODIFIER||||496|DopR|protein_coding|CODING|FBtr0290283|5);INTRON(MODIFIER||||511|DopR|protein_coding|CODING|FBtr0308191|5);INTRON(MODIFIER||||560|DopR|protein_coding|CODING|FBtr0330711|5)]	-
3L_6879044_SNP	A	G	G	0.1078	18	149	-0.08847	0.001522	0.00196333	-0.1352	8.515e-06	3.27697e-05	-0.1118	5.254e-05	0.000160416	0.04671	0.01167	0.0114398	SiteClass[|||],TranscriptAnnot[INTERGENIC(MODIFIER|||||||||)]	-
2R_3299398_SNP	C	A	A	0.0559	9	152	-0.1566	1.895e-05	4.29896e-05	-0.1631	4.985e-05	0.00013708	-0.1599	9.989e-06	3.40104e-05	0.006425	0.8048	0.802071	SiteClass[|||],TranscriptAnnot[INTERGENIC(MODIFIER|||||||||)]	(TF_binding_site|mE1_TFBS_cad|FBsf0000245975)
2R_2354125_SNP	C	G	G	0.0679	11	151	-0.1178	0.0004807	0.0011239	-0.1683	4.723e-06	3.43654e-05	-0.143	1.682e-05	0.00011963	0.05053	0.03291	0.0292067	SiteClass[|||],TranscriptAnnot[INTERGENIC(MODIFIER|||||||||)]	(transposable_element|FlyBase|FBti0019969),(transposable_element|FlyBase|FBti0060325),(transposable_element|FlyBase|FBti0060406)
2L_9071279_SNP	A	G	G	0.07975	13	150	-0.1121	0.000348	0.000953191	-0.1559	7.572e-06	3.6024e-05	-0.134	1.901e-05	0.000135539	0.04381	0.04153	0.0412928	SiteClass[FBgn0051708|CG31708|UPSTREAM|117],TranscriptAnnot[INTERGENIC(MODIFIER|||||||||);UPSTREAM(MODIFIER||||512|CG31708|protein_coding|CODING|FBtr0303881|);UPSTREAM(MODIFIER||||532|CG31708|protein_coding|CODING|FBtr0079776|);UPSTREAM(MODIFIER||||532|CG31708|protein_coding|CODING|FBtr0079777|)]	-
3R_9102354_SNP	C	T	T	0.1635	26	133	-0.09564	3.572e-05	0.000112034	-0.1152	8.588e-06	5.21946e-05	-0.1054	5.327e-06	3.66995e-05	0.01957	0.2292	0.220895	SiteClass[|||],TranscriptAnnot[INTERGENIC(MODIFIER|||||||||)]	(TF_binding_site|BDTNP1_TFBS_prd|FBsf0000276479),(TF_binding_site|mE1_TFBS_HSA|FBsf0000371167)
3R_5542154_SNP	T	C	C	0.05357	9	159	-0.1684	8.731e-06	3.79105e-05	-0.1676	6.28e-05	0.00104155	-0.168	8.672e-06	0.000210864	-0.0008487	0.9738	0.973549	SiteClass[FBgn0002431|hyd|NON_SYNONYMOUS_CODING|0],TranscriptAnnot[NON_SYNONYMOUS_CODING(MODERATE|MISSENSE|aGc/aAc|S2492N|2885|hyd|protein_coding|CODING|FBtr0082090|);NON_SYNONYMOUS_CODING(MODERATE|MISSENSE|aGc/aAc|S2494N|2887|hyd|protein_coding|CODING|FBtr0339599|)]	(TF_binding_site|mE1_TFBS_sens|FBsf0000230999)
3L_10569395_SNP	C	T	T	0.07927	13	151	-0.09249	0.002916	0.0113962	-0.1599	2.044e-06	3.99656e-05	-0.1262	3.58e-05	0.000741166	0.0674	0.001876	0.0015389	SiteClass[FBgn0052062|A2bp1|INTRON|0],TranscriptAnnot[INTRON(MODIFIER||||547|A2bp1|protein_coding|CODING|FBtr0332985|5);INTRON(MODIFIER||||763|A2bp1|protein_coding|CODING|FBtr0113419|6);INTRON(MODIFIER||||796|A2bp1|protein_coding|CODING|FBtr0305094|7);INTRON(MODIFIER||||858|A2bp1|protein_coding|CODING|FBtr0305097|6);INTRON(MODIFIER||||865|A2bp1|protein_coding|CODING|FBtr0113418|6);INTRON(MODIFIER…	-
3R_13662270_SNP	G	T	T	0.1067	16	134	-0.1251	9.45e-06	4.1145e-05	-0.1103	0.000479	0.00259376	-0.1177	3.047e-05	0.000245067	-0.01487	0.4589	0.451368	SiteClass[FBgn0261649|tinc|INTRON|0],TranscriptAnnot[INTRON(MODIFIER||||1513|tinc|protein_coding|CODING|FBtr0089771|3);INTRON(MODIFIER||||1513|tinc|protein_coding|CODING|FBtr0304905|3);INTRON(MODIFIER||||1513|tinc|protein_coding|CODING|FBtr0337038|3);INTRON(MODIFIER||||1513|tinc|protein_coding|CODING|FBtr0337039|2);INTRON(MODIFIER||||992|tinc|protein_coding|CODING|FBtr0089772|3)]	-
3L_6879468_DEL	T	TT	TT	0.07643	12	145	-0.111	0.00126	0.00240685	-0.1685	5.028e-06	4.2909e-05	-0.1397	3.689e-05	0.000281973	0.05745	0.01078	0.0097301	SiteClass[|||],TranscriptAnnot[INTERGENIC(MODIFIER|||||||||)]	-
3L_6872723_SNP	A	G	G	0.1707	28	136	-0.06855	0.003504	0.00482438	-0.1127	8.842e-06	4.29462e-05	-0.09065	9.145e-05	0.000341025	0.04419	0.004563	0.00391361	SiteClass[|||],TranscriptAnnot[INTERGENIC(MODIFIER|||||||||)]	(TF_binding_site|BDTNP1_TFBS_da|FBsf0000326276),(TF_binding_site|BDTNP1_TFBS_dl|FBsf0000305988),(TF_binding_site|BDTNP1_TFBS_twi|FBsf0000203119),(TF_binding_site|mE1_TFBS_HSA|FBsf0000362803)
3L_6870019_SNP	T	C	T	0.1975	32	130	-0.05181	0.02164	0.0299238	-0.1086	6.179e-06	4.65763e-05	-0.08021	0.0002901	0.00122624	0.0568	0.0001008	8.10221e-05	SiteClass[|||],TranscriptAnnot[INTERGENIC(MODIFIER|||||||||)]	-
X_5988398_SNP	G	A	A	0.1566	26	140	-0.07418	0.002047	0.00378016	-0.1188	4.79e-06	4.93781e-05	-0.09651	4.753e-05	0.000400025	0.04466	0.005256	0.0046205	SiteClass[FBgn0029843|Nep1|INTRON|0],TranscriptAnnot[INTRON(MODIFIER||||849|Nep1|protein_coding|CODING|FBtr0070872|1);INTRON(MODIFIER||||849|Nep1|protein_coding|CODING|FBtr0070873|1)]	(TF_binding_site|BDTNP1_TFBS_dl|FBsf0000316947),(TF_binding_site|mE1_TFBS_HSA|FBsf0000379741)
X_17744277_SNP	A	G	G	0.05325	9	160	-0.1512	6.897e-05	0.000135218	-0.1885	5.473e-06	5.05894e-05	-0.1698	6.371e-06	5.13039e-05	0.03732	0.1466	0.143581	SiteClass[FBgn0030873|CG15814|INTRON|0;FBgn0030874|CG6506|UPSTREAM|216],TranscriptAnnot[INTRON(MODIFIER||||321|CG15814|protein_coding|CODING|FBtr0074468|1);UPSTREAM(MODIFIER||||301|CG15814|protein_coding|CODING|FBtr0074471|);UPSTREAM(MODIFIER||||359|CG6506|protein_coding|CODING|FBtr0074465|);UTR_5_PRIME(MODIFIER||||321|CG15814|protein_coding|CODING|FBtr0074469|1);UTR_5_PRIME(MODIFIER||||321|CG158…	(TF_binding_site|BDTNP1_TFBS_da|FBsf0000332906),(TF_binding_site|BDTNP1_TFBS_dl|FBsf0000319941),(TF_binding_site|BDTNP1_TFBS_Med|FBsf0000289010),(TF_binding_site|BDTNP1_TFBS_slp1|FBsf0000273581),(TF_binding_site|BDTNP1_TFBS_twi|FBsf0000263600),(TF_binding_site|mE1_TFBS_cad|FBsf0000243611),(TF_binding_site|mE1_TFBS_D|FBsf0000238882),(TF_binding_site|mE1_TFBS_disco|FBsf0000261630),(TF_binding_site|…
2L_15973885_SNP	C	G	G	0.06707	11	153	-0.1345	0.000105	0.000297412	-0.1725	3.144e-06	5.09414e-05	-0.1535	6.012e-06	0.000103565	0.03792	0.1036	0.102646	SiteClass[|||],TranscriptAnnot[INTERGENIC(MODIFIER|||||||||)]	(regulatory_region|REDfly_CRMs|FBsf0000436777),(TF_binding_site|BDTNP1_TFBS_sna|FBsf0000268759),(TF_binding_site|mE1_TFBS_HSA|FBsf0000351492),(TF_binding_site|mE1_TFBS_HSA|FBsf0000351493)
2L_13053733_SNP	T	A	A	0.05488	9	155	-0.1313	0.0004689	0.000953894	-0.1868	6.012e-06	5.28215e-05	-0.159	2.122e-05	0.000194277	0.05548	0.0267	0.0291939	SiteClass[FBgn0262160|CG9932|INTRON|0],TranscriptAnnot[INTRON(MODIFIER||||1899|CG9932|protein_coding|CODING|FBtr0310277|1);INTRON(MODIFIER||||1988|CG9932|protein_coding|CODING|FBtr0336616|1);INTRON(MODIFIER||||2167|CG9932|protein_coding|CODING|FBtr0336617|1);INTRON(MODIFIER||||2171|CG9932|protein_coding|CODING|FBtr0089956|1)]	-
3R_9033085_SNP	A	G	A	0.3725	57	96	0.07898	3.664e-05	5.93695e-05	0.08936	2.001e-05	8.3195e-05	0.08417	9.193e-06	5.47864e-05	-0.01038	0.4255	0.405792	SiteClass[|||],TranscriptAnnot[INTERGENIC(MODIFIER|||||||||)]	-
3L_15666690_SNP	C	T	T	0.2642	42	117	-0.05902	0.003782	0.00617998	-0.09782	7.204e-06	5.54328e-05	-0.07842	9.127e-05	0.00053402	0.0388	0.003313	0.00346542	SiteClass[|||],TranscriptAnnot[INTERGENIC(MODIFIER|||||||||)]	(TF_binding_site|BDTNP1_TFBS_twi|FBsf0000203946),(TF_binding_site|mE1_TFBS_cnc|FBsf0000206540),(TF_binding_site|mE1_TFBS_HSA|FBsf0000365606),(TF_binding_site|mE1_TFBS_sens|FBsf0000224649)
3L_10651529_SNP	T	C	C	0.06707	11	153	-0.09752	0.004997	0.00961966	-0.1665	8.586e-06	5.73748e-05	-0.132	0.0001114	0.000613124	0.06898	0.003158	0.00272748	SiteClass[FBgn0052066|CG32066|INTRON|0],TranscriptAnnot[INTRON(MODIFIER||||324|CG32066|protein_coding|CODING|FBtr0076277|2);INTRON(MODIFIER||||324|CG32066|protein_coding|CODING|FBtr0076278|1)]	(TF_binding_site|mE1_TFBS_Trl|FBsf0000339769)
2R_2367888_SNP	T	A	A	0.07285	11	140	-0.1115	0.001059	0.00214614	-0.1639	6.784e-06	5.97053e-05	-0.1377	3.439e-05	0.000227645	0.05242	0.02567	0.0239776	SiteClass[|||],TranscriptAnnot[INTERGENIC(MODIFIER|||||||||)]	(transposable_element|FlyBase|FBti0059778)
X_15222735_SNP	G	A	A	0.07738	13	155	-0.1257	3.728e-05	0.000142979	-0.1473	1.304e-05	7.87599e-05	-0.1365	6.542e-06	6.36521e-05	0.0216	0.321	0.316011	SiteClass[FBgn0015926|dah|INTRON|0;FBgn0004924|Top1|DOWNSTREAM|673],TranscriptAnnot[DOWNSTREAM(MODIFIER||||974|Top1|protein_coding|CODING|FBtr0074005|);DOWNSTREAM(MODIFIER||||974|Top1|protein_coding|CODING|FBtr0100294|);INTRON(MODIFIER||||646|dah|protein_coding|CODING|FBtr0330404|1);INTRON(MODIFIER||||649|dah|protein_coding|CODING|FBtr0074007|1)]	(TF_binding_site|BDTNP1_TFBS_sna|FBsf0000270298),(TF_binding_site|mE1_TFBS_HSA|FBsf0000348093),(TF_binding_site|mE1_TFBS_sens|FBsf0000220964)
X_15222737_SNP	T	G	G	0.07186	12	155	-0.1391	1.058e-05	7.36539e-05	-0.1634	3.031e-06	8.96481e-05	-0.1512	1.399e-06	6.38717e-05	0.02421	0.2851	0.278653	SiteClass[FBgn0015926|dah|INTRON|0;FBgn0004924|Top1|DOWNSTREAM|675],TranscriptAnnot[DOWNSTREAM(MODIFIER||||974|Top1|protein_coding|CODING|FBtr0074005|);DOWNSTREAM(MODIFIER||||974|Top1|protein_coding|CODING|FBtr0100294|);INTRON(MODIFIER||||646|dah|protein_coding|CODING|FBtr0330404|1);INTRON(MODIFIER||||649|dah|protein_coding|CODING|FBtr0074007|1)]	(TF_binding_site|BDTNP1_TFBS_sna|FBsf0000270298),(TF_binding_site|mE1_TFBS_HSA|FBsf0000348093),(TF_binding_site|mE1_TFBS_sens|FBsf0000220964)
X_15212438_SNP	C	A	A	0.07229	12	154	-0.1288	5.832e-05	0.000310779	-0.1596	6.383e-06	7.12248e-05	-0.1442	5.679e-06	0.00011183	0.03075	0.1756	0.168544	SiteClass[FBgn0261703|gce|UTR_3_PRIME|0],TranscriptAnnot[UTR_3_PRIME(MODIFIER||||918|gce|protein_coding|CODING|FBtr0310309|10);UTR_3_PRIME(MODIFIER||||959|gce|protein_coding|CODING|FBtr0303198|10);UTR_3_PRIME(MODIFIER||||959|gce|protein_coding|CODING|FBtr0303199|10);UTR_3_PRIME(MODIFIER||||959|gce|protein_coding|CODING|FBtr0310308|10);UTR_3_PRIME(MODIFIER||||959|gce|protein_coding|CODING|FBtr0331…	-
X_21507317_SNP	C	T	C	0.06579	10	142	-0.116	0.001474	0.00308265	-0.1773	9.651e-06	7.82043e-05	-0.1467	5.831e-05	0.000417893	0.06137	0.008779	0.0112622	SiteClass[|||],TranscriptAnnot[INTERGENIC(MODIFIER|||||||||)]	-
3R_13922069_SNP	C	T	C	0.3355	51	101	-0.05467	0.003284	0.0118608	-0.09212	8.067e-06	9.36396e-05	-0.0734	8.047e-05	0.00142131	0.03745	0.002875	0.00312107	SiteClass[FBgn0003499|sr|SYNONYMOUS_CODING|0],TranscriptAnnot[SYNONYMOUS_CODING(LOW|SILENT|caC/caT|H114|1186|sr|protein_coding|CODING|FBtr0083542|);SYNONYMOUS_CODING(LOW|SILENT|caC/caT|H114|1271|sr|protein_coding|CODING|FBtr0330050|)]	-

## Sheet: mal.6.pheno
Malathion 6-hour mortality raw phenotypes
DGRP line	male	female
21	0	0.166667
26	0.226667	0.133333
28	0.888889	1
31	0.833333	0.661111
32	0.904762	1
38	1	0.791667
40	0.208333	0.0607143
41	0	0
42	0.308532	0.0634921
45	0.8	1
48	0.4375	0
57	1	0.677778
59	0.583333	0.375
73	0.901786	0.333333
75	0.047619	0
91	1	1
93	0.866667	0.785714
100	0.933333	0.714286
101	1	0.724868
109	0	0
129	0.197917	0.0555556
136	0.8	0.770833
138	0.901786	0.722222
142	0	0
153	0.413636	0.444444
181	0.514286	0.190476
189	0.418182	0.53125
195	0.025	0
208	1	0.804762
217	0.392857	0.277778
227	0.0416667	0
228	0.29	0.698413
229	0.763889	0.875
235	1	1
237	0.111111	0.266667
239	1	0.652381
280	0	0.28125
287	1	1
301	0.583333	0.690476
303	0.581349	0.265377
304	0	0.0555556
306	0.14	0.1
307	0.25	0.147222
309	0.518519	0.522917
313	0	0
315	0	0
317	0	0
318	0.5	0.377778
319	0.0972222	0.037037
320	0.125	0
321	0	0
324	0.607143	0.555556
332	0.75	0.952381
335	0	0
336	1	1
338	0.12037	0.0277778
340	0.222222	0.319048
350	0.047619	0.025
352	0.313492	0.037037
356	0.904762	1
357	0.975	0.233333
358	0.0555556	0
359	1	0.892593
360	0	0
361	0.428571	0.577778
362	0.227273	0.166667
365	0	0
367	1	1
370	0.783333	0.777778
371	0.825	0.8
373	0.574603	0.447619
375	0.15	0.14
377	0.128571	0.513889
379	0.166667	0.0416667
380	0.755556	0.944444
381	0.761905	0.952381
382	0.533333	0.140741
383	0.216667	0.238095
385	0.241667	0
386	0.769444	0.777778
391	0.863095	0.794444
392	0.0333333	0
395	0	0
397	0.075	0.361111
399	0.0833333	0
405	0.825	0.39127
406	0.333333	0.283333
409	0	0
426	0.255556	0
427	0.425926	0.45
437	1	1
439	0.114286	0
440	0	0
441	0.818182	0.888889
443	0.838095	1
486	1	1
491	0.17619	0.037037
502	1	0.785714
509	0.0333333	0.0277778
517	0.564444	0.541667
528	0.125	0.111111
530	0.671429	0.638889
531	0.117989	0.575661
535	0.667424	0.542857
551	0.571429	0.35119
555	1	0.866667
559	0.114286	0
563	0.577778	0.32963
566	1	1
584	0	0
589	0.0357143	0
595	0	0
596	0.204762	0.173333
627	0	0
639	0	0
642	1	1
646	0.45	0.0714286
703	0.025	0.0416667
705	0	0
707	0.237037	0
712	0	0
714	0.0833333	0.177778
716	0.877778	0.933333
721	0.2	0.0685714
730	0	0.037037
732	0.125	0.12
737	0	0
738	0	0.0416667
748	0	0.107407
757	0.361905	0.333333
761	0.111111	0.238095
765	0.0857143	0.075
774	0.225794	0.119048
776	1	1
783	0.108333	0.184524
786	0.888889	0.833333
787	0.916667	0.3
790	0	0
796	0	0
799	0	0
801	0	0
802	0.111111	0.166667
804	0.435	0.96875
805	0.1	0.0787037
808	0	0.0555556
810	0.777778	1
812	0	0
818	0.0416667	0
819	0.958333	1
820	0.388889	0.14
821	1	1
832	0.432044	0.230303
837	0.0333333	0
843	0.225	0.178571
849	0.0227273	0.037037
850	0	0
852	0.975	0.977778
853	0.35	0.426587
855	0	0
859	0.561905	0.727778
861	0	0
879	0	0
884	0.2	0.293651
892	0.811607	0.702381
894	0.878307	0.396825
897	0.640212	0.4
900	0.78	1
907	0	0
908	0.35	0.275
913	0	0

## Sheet: mal.6.GWAS
Malathion 6-hour mortality DGRP pipeline output
ID	MinorAllele	MajorAllele	RefAllele	MAF	MinorAlleleCount	MajorAlleleCount	FemaleEff	FemalePval	FemaleMixedPval	MaleEff	MalePval	MaleMixedPval	AvgEff	AvgPval	AvgMixedPval	DiffEff	DiffPval	DiffMixedPval	GeneAnnotation	RegulationAnnotation
3R_9069054_SNP	T	A	A	0.2829	43	109	0.2246	9.648e-14	1.70331e-12	0.2186	2.565e-13	1.35572e-11	0.2216	1.889e-14	7.20688e-13	0.005982	0.707	0.692663	SiteClass[FBgn0000024|Ace|NON_SYNONYMOUS_CODING|0],TranscriptAnnot[NON_SYNONYMOUS_CODING(MODERATE|MISSENSE|tTt/tAt|F368Y|636|Ace|protein_coding|CODING|FBtr0335223|);NON_SYNONYMOUS_CODING(MODERATE|MISSENSE|tTt/tAt|F368Y|649|Ace|protein_coding|CODING|FBtr0082780|);NON_SYNONYMOUS_CODING(MODERATE|MISSENSE|tTt/tAt|F368Y|649|Ace|protein_coding|CODING|FBtr0300486|)]	-
3R_9031928_SNP	T	C	C	0.4362	65	84	-0.1935	4.739e-12	1.4753e-12	-0.1678	2.905e-09	5.01201e-09	-0.1806	3.358e-11	2.13644e-11	-0.02566	0.06554	0.0632612	SiteClass[|||],TranscriptAnnot[INTERGENIC(MODIFIER|||||||||)]	-
3R_8988821_SNP	A	G	G	0.4103	64	92	-0.1838	1.007e-11	2.17874e-12	-0.1702	4.114e-10	2.40191e-10	-0.177	1.398e-11	4.21677e-12	-0.0136	0.3331	0.31976	SiteClass[FBgn0038118|timeout|SYNONYMOUS_CODING|0],TranscriptAnnot[SYNONYMOUS_CODING(LOW|SILENT|caG/caA|Q1150|1384|timeout|protein_coding|CODING|FBtr0082712|)]	-
3R_9069721_SNP	C	T	T	0.3851	57	91	0.203	1.684e-12	6.31083e-12	0.1966	6.525e-12	4.75083e-11	0.1998	6.131e-13	2.90918e-12	0.0064	0.6579	0.652109	SiteClass[FBgn0000024|Ace|NON_SYNONYMOUS_CODING|0],TranscriptAnnot[NON_SYNONYMOUS_CODING(MODERATE|MISSENSE|Atc/Gtc|I199V|636|Ace|protein_coding|CODING|FBtr0335223|);NON_SYNONYMOUS_CODING(MODERATE|MISSENSE|Atc/Gtc|I199V|649|Ace|protein_coding|CODING|FBtr0082780|);NON_SYNONYMOUS_CODING(MODERATE|MISSENSE|Atc/Gtc|I199V|649|Ace|protein_coding|CODING|FBtr0300486|)]	-
3R_9031918_SNP	A	C	C	0.44	66	84	-0.1901	8.846e-12	6.81531e-12	-0.162	9.712e-09	5.42611e-08	-0.176	8.875e-11	1.93818e-10	-0.0281	0.04646	0.0409104	SiteClass[|||],TranscriptAnnot[INTERGENIC(MODIFIER|||||||||)]	-
3R_8985973_SNP	C	T	C	0.4527	67	81	-0.1793	1.775e-10	9.55484e-12	-0.1593	1.567e-08	5.35619e-09	-0.1693	4.661e-10	5.51367e-11	-0.02	0.1704	0.148453	SiteClass[FBgn0038118|timeout|INTRON|0],TranscriptAnnot[INTRON(MODIFIER||||1384|timeout|protein_coding|CODING|FBtr0082712|14)]	-
3R_9005502_SNP	T	G	G	0.481	76	82	-0.1746	1.274e-10	1.09414e-11	-0.1544	1.656e-08	6.63681e-09	-0.1645	4.588e-10	6.70111e-11	-0.02023	0.1357	0.129334	SiteClass[|||],TranscriptAnnot[INTERGENIC(MODIFIER|||||||||)]	-
3R_9114055_SNP	T	A	A	0.3333	52	104	-0.1936	2.908e-11	1.31734e-11	-0.1722	3.086e-09	5.81399e-09	-0.1829	8.321e-11	6.78336e-11	-0.02144	0.1386	0.131952	SiteClass[FBgn0038132|CG15887|INTRON|0],TranscriptAnnot[INTRON(MODIFIER||||137|CG15887|protein_coding|CODING|FBtr0082776|1)]	(TF_binding_site|mE1_TFBS_inv|FBsf0000237171)
3R_8986205_SNP	T	A	A	0.2704	43	116	-0.1964	8.771e-11	3.60777e-11	-0.1932	2.511e-10	1.36137e-10	-0.1948	3.733e-11	1.31997e-11	-0.003228	0.8306	0.829686	SiteClass[FBgn0038118|timeout|INTRON|0],TranscriptAnnot[INTRON(MODIFIER||||1384|timeout|protein_coding|CODING|FBtr0082712|14)]	-
3R_9017823_SNP	C	A	C	0.3613	56	99	0.1837	1.157e-10	1.65782e-11	0.1672	4.576e-09	4.21588e-09	0.1754	1.976e-10	6.28108e-11	0.01648	0.2555	0.240012	SiteClass[FBgn0038125|CG8141|NON_SYNONYMOUS_CODING|0],TranscriptAnnot[NON_SYNONYMOUS_CODING(MODERATE|MISSENSE|Cag/Aag|Q118K|239|CG8141|protein_coding|CODING|FBtr0082734|)]	-
3R_9069408_SNP	G	C	C	0.281	43	110	0.2067	8.807e-12	1.44254e-10	0.2058	5.833e-12	9.65453e-11	0.2063	1.191e-12	2.31692e-11	0.0008773	0.9558	0.953737	SiteClass[FBgn0000024|Ace|NON_SYNONYMOUS_CODING|0],TranscriptAnnot[NON_SYNONYMOUS_CODING(MODERATE|MISSENSE|gGc/gCc|G303A|636|Ace|protein_coding|CODING|FBtr0335223|);NON_SYNONYMOUS_CODING(MODERATE|MISSENSE|gGc/gCc|G303A|649|Ace|protein_coding|CODING|FBtr0082780|);NON_SYNONYMOUS_CODING(MODERATE|MISSENSE|gGc/gCc|G303A|649|Ace|protein_coding|CODING|FBtr0300486|)]	-
3R_9018365_SNP	A	G	A	0.391	61	95	0.1779	2.159e-10	2.95396e-11	0.1641	5.027e-09	5.89671e-09	0.171	2.887e-10	1.0212e-10	0.01385	0.3301	0.314583	SiteClass[FBgn0038125|CG8141|DOWNSTREAM|134],TranscriptAnnot[DOWNSTREAM(MODIFIER||||239|CG8141|protein_coding|CODING|FBtr0082734|);INTERGENIC(MODIFIER|||||||||)]	-
3R_9017824_SNP	A	C	A	0.3576	54	97	0.1811	5.505e-10	4.80571e-11	0.1636	1.883e-08	1.24337e-08	0.1723	9.71e-10	2.02174e-10	0.01752	0.2357	0.218756	SiteClass[FBgn0038125|CG8141|NON_SYNONYMOUS_CODING|0],TranscriptAnnot[NON_SYNONYMOUS_CODING(MODERATE|MISSENSE|cAg/cCg|Q118P|239|CG8141|protein_coding|CODING|FBtr0082734|)]	-
3R_8986215_SNP	A	T	T	0.2704	43	116	-0.1915	2.9e-10	1.57223e-10	-0.1893	6.096e-10	5.47343e-10	-0.1904	1.133e-10	6.24251e-11	-0.002196	0.8845	0.883693	SiteClass[FBgn0038118|timeout|INTRON|0],TranscriptAnnot[INTRON(MODIFIER||||1384|timeout|protein_coding|CODING|FBtr0082712|14)]	-
3R_8990896_SNP	A	G	G	0.4076	64	93	-0.1646	3.767e-09	8.18726e-11	-0.149	9.117e-08	1.24211e-08	-0.1568	6.328e-09	2.63393e-10	-0.01561	0.2679	0.251903	SiteClass[|||],TranscriptAnnot[INTERGENIC(MODIFIER|||||||||)]	-
3R_9018366_SNP	A	C	A	0.3871	60	95	0.1757	5.085e-10	9.20924e-11	0.1627	8.524e-09	1.20073e-08	0.1692	5.983e-10	2.73854e-10	0.01299	0.3655	0.34822	SiteClass[FBgn0038125|CG8141|DOWNSTREAM|135],TranscriptAnnot[DOWNSTREAM(MODIFIER||||239|CG8141|protein_coding|CODING|FBtr0082734|);INTERGENIC(MODIFIER|||||||||)]	-
3R_9033676_SNP	G	C	C	0.3533	53	97	-0.1895	8.339e-11	1.15744e-10	-0.18	6.747e-10	1.96438e-09	-0.1848	6.877e-11	1.08481e-10	-0.009451	0.4979	0.510184	SiteClass[FBgn0038126|CG8483|DOWNSTREAM|800],TranscriptAnnot[DOWNSTREAM(MODIFIER||||392|CG8483|protein_coding|CODING|FBtr0082782|);INTERGENIC(MODIFIER|||||||||)]	(TF_binding_site|mE1_TFBS_Trl|FBsf0000340966)
3R_9087510_SNP	C	T	C	0.4797	71	77	0.1784	1.84e-10	5.37921e-10	0.1782	1.771e-10	8.37255e-10	0.1783	4.495e-11	1.52455e-10	0.0002338	0.9866	0.986522	SiteClass[FBgn0040551|CG11686|INTRON|0;FBgn0038128|Ravus|DOWNSTREAM|944],TranscriptAnnot[DOWNSTREAM(MODIFIER||||359|Ravus|protein_coding|CODING|FBtr0082779|);INTRON(MODIFIER||||70|CG11686|protein_coding|CODING|FBtr0082735|2);INTRON(MODIFIER||||70|CG11686|protein_coding|CODING|FBtr0335222|2)]	-
3R_9018389_SNP	C	T	C	0.3896	60	94	0.1794	2.069e-10	2.26536e-10	0.168	2.866e-09	6.26809e-09	0.1737	2.052e-10	2.96809e-10	0.01146	0.4253	0.409023	SiteClass[FBgn0038125|CG8141|DOWNSTREAM|158],TranscriptAnnot[DOWNSTREAM(MODIFIER||||239|CG8141|protein_coding|CODING|FBtr0082734|);INTERGENIC(MODIFIER|||||||||)]	-
3R_8986293_SNP	C	T	T	0.4545	70	84	-0.1648	3.224e-09	2.38995e-10	-0.1506	5.725e-08	3.90279e-08	-0.1577	4.437e-09	8.81362e-10	-0.01427	0.3123	0.293484	SiteClass[FBgn0038118|timeout|INTRON|0],TranscriptAnnot[INTRON(MODIFIER||||1384|timeout|protein_coding|CODING|FBtr0082712|14)]	-
3R_9102472_SNP	T	A	T	0.4444	68	85	0.1795	1.574e-10	3.01631e-10	0.1736	4.157e-10	3.33955e-09	0.1766	6.728e-11	2.40969e-10	0.005925	0.6674	0.664821	SiteClass[|||],TranscriptAnnot[INTERGENIC(MODIFIER|||||||||)]	(TF_binding_site|BDTNP1_TFBS_Med|FBsf0000285183),(TF_binding_site|BDTNP1_TFBS_prd|FBsf0000276479),(TF_binding_site|mE1_TFBS_HSA|FBsf0000371167)
3R_8988335_SNP	G	C	C	0.3145	50	109	-0.172	4.168e-09	2.41883e-10	-0.1621	2.771e-08	4.21786e-09	-0.1671	3.509e-09	2.45086e-10	-0.009867	0.5006	0.491685	SiteClass[FBgn0038118|timeout|NON_SYNONYMOUS_CODING|0],TranscriptAnnot[NON_SYNONYMOUS_CODING(MODERATE|MISSENSE|gaC/gaG|D988E|1384|timeout|protein_coding|CODING|FBtr0082712|)]	-
3R_9015116_SNP	T	C	T	0.351	53	98	0.1826	3.98e-10	2.65508e-10	0.1618	3.322e-08	1.31247e-07	0.1722	1.127e-09	1.91344e-09	0.02083	0.1623	0.14496	SiteClass[FBgn0038124|CG14380|UTR_3_PRIME|0],TranscriptAnnot[UTR_3_PRIME(MODIFIER||||168|CG14380|protein_coding|CODING|FBtr0300768|3)]	-
3R_9087504_INS	TATAGGGAT	T	T	0.2038	32	125	-0.2057	9.52e-10	2.79611e-10	-0.1884	2.575e-08	8.90655e-09	-0.197	1.538e-09	4.04223e-10	-0.01734	0.3112	0.297126	SiteClass[FBgn0040551|CG11686|INTRON|0;FBgn0038128|Ravus|DOWNSTREAM|949],TranscriptAnnot[DOWNSTREAM(MODIFIER||||359|Ravus|protein_coding|CODING|FBtr0082779|);INTRON(MODIFIER||||70|CG11686|protein_coding|CODING|FBtr0082735|2);INTRON(MODIFIER||||70|CG11686|protein_coding|CODING|FBtr0335222|2)]	-
3R_9028964_SNP	T	A	A	0.4103	64	92	-0.177	6.381e-11	2.86145e-10	-0.1505	4.609e-08	4.14959e-07	-0.1638	5.441e-10	4.00405e-09	-0.02652	0.05971	0.0512976	SiteClass[|||],TranscriptAnnot[INTERGENIC(MODIFIER|||||||||)]	-
3R_9031423_SNP	T	G	G	0.2829	43	109	-0.1883	1.145e-09	3.06205e-10	-0.1738	2.038e-08	5.18486e-08	-0.181	1.555e-09	1.17868e-09	-0.01452	0.3459	0.336896	SiteClass[|||],TranscriptAnnot[INTERGENIC(MODIFIER|||||||||)]	-
3R_8979756_SNP	T	C	C	0.3608	57	101	-0.1515	1.764e-07	2.94265e-09	-0.156	5.129e-08	6.78044e-10	-0.1537	3.618e-08	3.45801e-10	0.004522	0.7531	0.745366	SiteClass[FBgn0038118|timeout|INTRON|0;FBgn0260793|2mit|INTRON|0],TranscriptAnnot[INTRON(MODIFIER||||1141|2mit|protein_coding|CODING|FBtr0301436|2);INTRON(MODIFIER||||1155|2mit|protein_coding|CODING|FBtr0330143|2);INTRON(MODIFIER||||1384|timeout|protein_coding|CODING|FBtr0082712|11)]	-
3R_9078332_SNP	G	C	C	0.2308	36	120	-0.1996	8.607e-10	5.55245e-10	-0.1889	6.1e-09	1.16897e-08	-0.1943	6.641e-10	6.715e-10	-0.01071	0.5139	0.502276	SiteClass[FBgn0000024|Ace|INTRON|0],TranscriptAnnot[INTRON(MODIFIER||||636|Ace|protein_coding|CODING|FBtr0335223|1);INTRON(MODIFIER||||649|Ace|protein_coding|CODING|FBtr0082780|1);INTRON(MODIFIER||||649|Ace|protein_coding|CODING|FBtr0300486|2)]	-
3R_8988291_INS	TGGA	G	G	0.3077	48	108	-0.1704	1.153e-08	7.17275e-10	-0.1622	5.473e-08	7.92182e-09	-0.1663	8.695e-09	6.15301e-10	-0.008198	0.583	0.573853	SiteClass[FBgn0038118|timeout|STOP_GAINED|0],TranscriptAnnot[STOP_GAINED(HIGH||-/TGA|-974*|1384|timeout|protein_coding|CODING|FBtr0082712|18)]	-
3R_9114081_SNP	G	C	G	0.4379	67	86	0.179	1.148e-10	6.95953e-10	0.1608	6.854e-09	3.35093e-07	0.1699	2.454e-10	5.37616e-09	0.01823	0.1973	0.182223	SiteClass[FBgn0038132|CG15887|INTRON|0],TranscriptAnnot[INTRON(MODIFIER||||137|CG15887|protein_coding|CODING|FBtr0082776|1)]	(TF_binding_site|mE1_TFBS_inv|FBsf0000237171)
3R_9018353_SNP	A	G	A	0.4	62	93	0.1754	1.603e-10	6.98845e-10	0.1622	3.712e-09	5.11769e-08	0.1688	1.946e-10	1.76569e-09	0.01321	0.3551	0.337333	SiteClass[FBgn0038125|CG8141|DOWNSTREAM|122],TranscriptAnnot[DOWNSTREAM(MODIFIER||||239|CG8141|protein_coding|CODING|FBtr0082734|);INTERGENIC(MODIFIER|||||||||)]	-
3R_9087531_SNP	T	G	G	0.3309	46	93	-0.1813	5.686e-09	7.61284e-09	-0.1903	5.961e-10	1.09151e-09	-0.1858	5.785e-10	7.55118e-10	0.009032	0.55	0.550939	SiteClass[FBgn0040551|CG11686|INTRON|0;FBgn0038128|Ravus|DOWNSTREAM|923],TranscriptAnnot[DOWNSTREAM(MODIFIER||||359|Ravus|protein_coding|CODING|FBtr0082779|);INTRON(MODIFIER||||70|CG11686|protein_coding|CODING|FBtr0082735|2);INTRON(MODIFIER||||70|CG11686|protein_coding|CODING|FBtr0335222|2)]	-
3R_8979771_SNP	T	G	G	0.2129	33	122	-0.1985	3.631e-09	1.03499e-09	-0.1882	2.017e-08	9.50731e-09	-0.1933	2.615e-09	8.25367e-10	-0.01034	0.5471	0.530687	SiteClass[FBgn0038118|timeout|INTRON|0;FBgn0260793|2mit|INTRON|0],TranscriptAnnot[INTRON(MODIFIER||||1141|2mit|protein_coding|CODING|FBtr0301436|2);INTRON(MODIFIER||||1155|2mit|protein_coding|CODING|FBtr0330143|2);INTRON(MODIFIER||||1384|timeout|protein_coding|CODING|FBtr0082712|11)]	-
3R_9087502_SNP	C	T	T	0.216	35	127	-0.1944	1.744e-09	8.62754e-10	-0.1789	3.502e-08	7.71466e-08	-0.1866	2.556e-09	2.49355e-09	-0.01546	0.3413	0.33478	SiteClass[FBgn0040551|CG11686|INTRON|0;FBgn0038128|Ravus|DOWNSTREAM|952],TranscriptAnnot[DOWNSTREAM(MODIFIER||||359|Ravus|protein_coding|CODING|FBtr0082779|);INTRON(MODIFIER||||70|CG11686|protein_coding|CODING|FBtr0082735|2);INTRON(MODIFIER||||70|CG11686|protein_coding|CODING|FBtr0335222|2)]	-
3R_9078765_SNP	T	C	C	0.3092	47	105	-0.1792	2.338e-09	6.31572e-09	-0.1785	2.257e-09	2.13373e-09	-0.1789	6.617e-10	9.67361e-10	-0.0006407	0.9661	0.965381	SiteClass[FBgn0000024|Ace|INTRON|0],TranscriptAnnot[INTRON(MODIFIER||||636|Ace|protein_coding|CODING|FBtr0335223|1);INTRON(MODIFIER||||649|Ace|protein_coding|CODING|FBtr0082780|1);INTRON(MODIFIER||||649|Ace|protein_coding|CODING|FBtr0300486|2)]	-
3R_9101860_SNP	A	T	T	0.2839	44	111	-0.1863	7.565e-10	1.45572e-09	-0.181	2.684e-09	9.36315e-09	-0.1836	4.086e-10	9.78451e-10	-0.005272	0.728	0.724781	SiteClass[|||],TranscriptAnnot[INTERGENIC(MODIFIER|||||||||)]	-
3R_8986185_SNP	A	G	G	0.4333	65	85	-0.1592	1.548e-08	1.18122e-09	-0.1492	9.076e-08	3.38963e-08	-0.1542	1.259e-08	1.81577e-09	-0.01001	0.486	0.469597	SiteClass[FBgn0038118|timeout|INTRON|0],TranscriptAnnot[INTRON(MODIFIER||||1384|timeout|protein_coding|CODING|FBtr0082712|14)]	-
3R_8979770_SNP	G	A	A	0.2115	33	123	-0.1962	5.617e-09	1.74445e-09	-0.1865	2.869e-08	1.39297e-08	-0.1913	4.055e-09	1.34286e-09	-0.009674	0.5709	0.557021	SiteClass[FBgn0038118|timeout|INTRON|0;FBgn0260793|2mit|INTRON|0],TranscriptAnnot[INTRON(MODIFIER||||1141|2mit|protein_coding|CODING|FBtr0301436|2);INTRON(MODIFIER||||1155|2mit|protein_coding|CODING|FBtr0330143|2);INTRON(MODIFIER||||1384|timeout|protein_coding|CODING|FBtr0082712|11)]	-
3R_9069248_SNP	T	A	A	0.3087	46	103	0.1876	4.078e-10	5.60952e-09	0.1876	2.697e-10	4.69858e-09	0.1876	7.223e-11	1.38043e-09	-5.066e-05	0.9974	0.997293	SiteClass[FBgn0000024|Ace|INTRON|0],TranscriptAnnot[INTRON(MODIFIER||||636|Ace|protein_coding|CODING|FBtr0335223|4);INTRON(MODIFIER||||649|Ace|protein_coding|CODING|FBtr0082780|4);INTRON(MODIFIER||||649|Ace|protein_coding|CODING|FBtr0300486|5)]	-
3R_8986217_SNP	T	G	G	0.4474	68	84	-0.1563	3.663e-08	1.39031e-09	-0.141	5.514e-07	1.60814e-07	-0.1487	5.942e-08	4.86697e-09	-0.01529	0.2657	0.264049	SiteClass[FBgn0038118|timeout|INTRON|0],TranscriptAnnot[INTRON(MODIFIER||||1384|timeout|protein_coding|CODING|FBtr0082712|14)]	-
3R_9087669_SNP	C	A	A	0.331	47	95	-0.1727	2.887e-08	2.08789e-08	-0.1857	1.484e-09	1.39791e-09	-0.1792	2.323e-09	1.51846e-09	0.01299	0.385	0.385565	SiteClass[FBgn0040551|CG11686|INTRON|0;FBgn0038128|Ravus|DOWNSTREAM|785],TranscriptAnnot[DOWNSTREAM(MODIFIER||||359|Ravus|protein_coding|CODING|FBtr0082779|);INTRON(MODIFIER||||70|CG11686|protein_coding|CODING|FBtr0082735|2);INTRON(MODIFIER||||70|CG11686|protein_coding|CODING|FBtr0335222|2)]	-
3R_8990351_SNP	G	A	A	0.172	27	130	-0.2027	3.063e-08	2.41999e-09	-0.1939	9.973e-08	1.40827e-08	-0.1983	2.028e-08	1.60406e-09	-0.008825	0.6269	0.619509	SiteClass[FBgn0038118|timeout|DOWNSTREAM|753],TranscriptAnnot[DOWNSTREAM(MODIFIER||||1384|timeout|protein_coding|CODING|FBtr0082712|);INTERGENIC(MODIFIER|||||||||)]	-
3R_8979781_SNP	A	G	G	0.3986	59	89	-0.1623	2.153e-08	3.14724e-09	-0.1607	2.043e-08	1.20604e-08	-0.1615	7.732e-09	1.69097e-09	-0.001595	0.9085	0.910026	SiteClass[FBgn0038118|timeout|INTRON|0;FBgn0260793|2mit|INTRON|0],TranscriptAnnot[INTRON(MODIFIER||||1141|2mit|protein_coding|CODING|FBtr0301436|2);INTRON(MODIFIER||||1155|2mit|protein_coding|CODING|FBtr0330143|2);INTRON(MODIFIER||||1384|timeout|protein_coding|CODING|FBtr0082712|11)]	-
3R_8990415_SNP	G	A	A	0.1519	24	134	-0.2155	1.427e-08	1.78423e-09	-0.2034	9.435e-08	2.25285e-08	-0.2094	1.316e-08	1.77993e-09	-0.0121	0.5243	0.515972	SiteClass[FBgn0038118|timeout|DOWNSTREAM|817],TranscriptAnnot[DOWNSTREAM(MODIFIER||||1384|timeout|protein_coding|CODING|FBtr0082712|);INTERGENIC(MODIFIER|||||||||)]	-
3R_9076310_SNP	A	C	C	0.2092	32	121	-0.2021	2.129e-09	4.72727e-08	-0.2158	2.275e-10	1.96544e-09	-0.209	1.942e-10	2.88425e-09	0.01366	0.4173	0.4133	SiteClass[FBgn0000024|Ace|INTRON|0],TranscriptAnnot[INTRON(MODIFIER||||636|Ace|protein_coding|CODING|FBtr0335223|1);INTRON(MODIFIER||||649|Ace|protein_coding|CODING|FBtr0082780|1);INTRON(MODIFIER||||649|Ace|protein_coding|CODING|FBtr0300486|2)]	-
3R_8998765_SNP	T	C	T	0.4551	71	85	0.1554	2.167e-08	2.31221e-09	0.1453	1.496e-07	7.81793e-08	0.1504	2.03e-08	4.12952e-09	0.0101	0.4719	0.454473	SiteClass[|||],TranscriptAnnot[INTERGENIC(MODIFIER|||||||||)]	-
3R_8986186_SNP	A	T	T	0.4452	69	86	-0.1545	2.15e-08	2.35552e-09	-0.1463	1.059e-07	4.11612e-08	-0.1504	1.671e-08	2.88961e-09	-0.00822	0.5563	0.544986	SiteClass[FBgn0038118|timeout|INTRON|0],TranscriptAnnot[INTRON(MODIFIER||||1384|timeout|protein_coding|CODING|FBtr0082712|14)]	-
3R_9014506_SNP	A	G	A	0.3791	58	95	0.167	8.484e-09	2.36093e-09	0.1443	5.78e-07	1.26422e-06	0.1556	2.778e-08	2.16756e-08	0.0227	0.1154	0.103792	SiteClass[FBgn0038124|CG14380|SYNONYMOUS_CODING|0],TranscriptAnnot[SYNONYMOUS_CODING(LOW|SILENT|caA/caG|Q43|168|CG14380|protein_coding|CODING|FBtr0300768|)]	-
3R_9014302_INS	T	TTA	T	0.4133	62	88	0.1636	1.489e-08	2.37088e-09	0.1474	3.078e-07	2.64704e-07	0.1555	2.603e-08	8.50508e-09	0.01613	0.2605	0.246149	SiteClass[FBgn0038124|CG14380|UTR_5_PRIME|0],TranscriptAnnot[UTR_5_PRIME(MODIFIER||||168|CG14380|protein_coding|CODING|FBtr0300768|1)]	-
3R_8978647_SNP	G	C	C	0.1812	29	131	-0.1971	2.068e-08	2.90351e-09	-0.1717	1.323e-06	5.93875e-07	-0.1844	7.196e-08	1.51784e-08	-0.02542	0.1449	0.139359	SiteClass[FBgn0038118|timeout|INTRON|0;FBgn0260793|2mit|INTRON|0],TranscriptAnnot[INTRON(MODIFIER||||1141|2mit|protein_coding|CODING|FBtr0301436|2);INTRON(MODIFIER||||1155|2mit|protein_coding|CODING|FBtr0330143|2);INTRON(MODIFIER||||1384|timeout|protein_coding|CODING|FBtr0082712|11)]	-
3R_9013089_SNP	C	T	C	0.3758	59	98	0.1643	5.022e-09	2.97951e-09	0.1445	2.768e-07	1.14525e-06	0.1544	1.367e-08	2.28216e-08	0.01983	0.1633	0.151089	SiteClass[FBgn0038123|CG8508|UPSTREAM|857],TranscriptAnnot[INTERGENIC(MODIFIER|||||||||);UPSTREAM(MODIFIER||||267|CG8508|protein_coding|CODING|FBtr0082783|)]	-
3R_9035795_SNP	G	A	A	0.351	53	98	-0.1691	1.069e-08	1.3536e-08	-0.1674	9.947e-09	9.75436e-09	-0.1683	3.356e-09	3.3003e-09	-0.001727	0.9063	0.904132	SiteClass[FBgn0038126|CG8483|SYNONYMOUS_CODING|0],TranscriptAnnot[SYNONYMOUS_CODING(LOW|SILENT|ccT/ccC|P181|392|CG8483|protein_coding|CODING|FBtr0082782|)]	-
3R_9005478_SNP	A	C	C	0.4605	70	82	-0.1622	6.989e-09	3.46378e-09	-0.1398	6.309e-07	1.5183e-06	-0.151	2.683e-08	2.91177e-08	-0.02234	0.1092	0.101063	SiteClass[|||],TranscriptAnnot[INTERGENIC(MODIFIER|||||||||)]	-
3R_9048955_SNP	G	A	A	0.4467	67	83	-0.1622	7.956e-09	3.62405e-09	-0.1371	1.418e-06	3.67166e-06	-0.1497	4.649e-08	5.12089e-08	-0.02509	0.07378	0.0678456	SiteClass[FBgn0000024|Ace|UTR_3_PRIME|0],TranscriptAnnot[UTR_3_PRIME(MODIFIER||||636|Ace|protein_coding|CODING|FBtr0335223|10)]	-
3R_9076308_SNP	C	T	T	0.2157	33	120	-0.1998	2.093e-09	4.77132e-08	-0.2095	4.33e-10	4.90533e-09	-0.2046	2.671e-10	4.63029e-09	0.009625	0.5638	0.560059	SiteClass[FBgn0000024|Ace|INTRON|0],TranscriptAnnot[INTRON(MODIFIER||||636|Ace|protein_coding|CODING|FBtr0335223|1);INTRON(MODIFIER||||649|Ace|protein_coding|CODING|FBtr0082780|1);INTRON(MODIFIER||||649|Ace|protein_coding|CODING|FBtr0300486|2)]	-
3R_9014198_SNP	C	T	C	0.391	61	95	0.1591	2.519e-08	5.09639e-09	0.1419	6.345e-07	5.92135e-07	0.1505	5.083e-08	1.99684e-08	0.01722	0.2254	0.210941	SiteClass[FBgn0038124|CG14380|UPSTREAM|89],TranscriptAnnot[INTERGENIC(MODIFIER|||||||||);UPSTREAM(MODIFIER||||168|CG14380|protein_coding|CODING|FBtr0300768|)]	-
3R_9048956_SNP	T	G	G	0.4362	65	84	-0.1612	1.741e-08	5.75554e-09	-0.1371	2.044e-06	4.40016e-06	-0.1491	8.391e-08	7.12209e-08	-0.02419	0.09012	0.0802281	SiteClass[FBgn0000024|Ace|UTR_3_PRIME|0],TranscriptAnnot[UTR_3_PRIME(MODIFIER||||636|Ace|protein_coding|CODING|FBtr0335223|10)]	-
3R_9076306_SNP	A	T	T	0.2179	34	122	-0.1945	2.878e-09	8.53299e-08	-0.2052	5.023e-10	6.6381e-09	-0.1998	3.442e-10	7.5221e-09	0.01076	0.5109	0.509128	SiteClass[FBgn0000024|Ace|INTRON|0],TranscriptAnnot[INTRON(MODIFIER||||636|Ace|protein_coding|CODING|FBtr0335223|1);INTRON(MODIFIER||||649|Ace|protein_coding|CODING|FBtr0082780|1);INTRON(MODIFIER||||649|Ace|protein_coding|CODING|FBtr0300486|2)]	-
3R_9076317_DEL	A	AG	AG	0.2026	31	122	-0.1958	7.506e-09	2.52252e-07	-0.2122	5.938e-10	6.78488e-09	-0.204	6.28e-10	1.41845e-08	0.01642	0.3343	0.330872	SiteClass[FBgn0000024|Ace|INTRON|0],TranscriptAnnot[INTRON(MODIFIER||||636|Ace|protein_coding|CODING|FBtr0335223|1);INTRON(MODIFIER||||649|Ace|protein_coding|CODING|FBtr0082780|1);INTRON(MODIFIER||||649|Ace|protein_coding|CODING|FBtr0300486|2)]	-
3R_9078718_SNP	C	T	C	0.4679	73	83	0.1663	1.714e-09	9.24403e-09	0.1591	6.512e-09	5.84984e-08	0.1627	9.939e-10	7.15833e-09	0.007234	0.601	0.591633	SiteClass[FBgn0000024|Ace|INTRON|0],TranscriptAnnot[INTRON(MODIFIER||||636|Ace|protein_coding|CODING|FBtr0335223|1);INTRON(MODIFIER||||649|Ace|protein_coding|CODING|FBtr0082780|1);INTRON(MODIFIER||||649|Ace|protein_coding|CODING|FBtr0300486|2)]	-
3R_9043065_SNP	G	A	A	0.3624	54	95	-0.1604	4.278e-08	7.19261e-09	-0.144	8.356e-07	4.90168e-07	-0.1522	8.119e-08	2.11931e-08	-0.01639	0.2493	0.251724	SiteClass[|||],TranscriptAnnot[INTERGENIC(MODIFIER|||||||||)]	-
3R_9076302_SNP	T	A	A	0.2194	34	121	-0.1937	3.658e-09	9.88796e-08	-0.2048	6.228e-10	7.28602e-09	-0.1992	4.387e-10	8.5798e-09	0.01118	0.4958	0.493003	SiteClass[FBgn0000024|Ace|INTRON|0],TranscriptAnnot[INTRON(MODIFIER||||636|Ace|protein_coding|CODING|FBtr0335223|1);INTRON(MODIFIER||||649|Ace|protein_coding|CODING|FBtr0082780|1);INTRON(MODIFIER||||649|Ace|protein_coding|CODING|FBtr0300486|2)]	-
3R_9076295_DEL	C	CGATC	CGATC	0.2194	34	121	-0.1933	3.722e-09	1.07809e-07	-0.2043	6.502e-10	8.13408e-09	-0.1988	4.506e-10	9.53508e-09	0.01108	0.4997	0.496758	SiteClass[FBgn0000024|Ace|INTRON|0],TranscriptAnnot[INTRON(MODIFIER||||636|Ace|protein_coding|CODING|FBtr0335223|1);INTRON(MODIFIER||||649|Ace|protein_coding|CODING|FBtr0082780|1);INTRON(MODIFIER||||649|Ace|protein_coding|CODING|FBtr0300486|2)]	-
3R_9069659_SNP	T	C	C	0.2179	34	122	-0.186	2.874e-08	8.95232e-09	-0.1742	1.698e-07	3.09047e-07	-0.1801	2.69e-08	1.80913e-08	-0.01183	0.471	0.467853	SiteClass[FBgn0000024|Ace|SYNONYMOUS_CODING|0],TranscriptAnnot[SYNONYMOUS_CODING(LOW|SILENT|cgG/cgA|R219|636|Ace|protein_coding|CODING|FBtr0335223|);SYNONYMOUS_CODING(LOW|SILENT|cgG/cgA|R219|649|Ace|protein_coding|CODING|FBtr0082780|);SYNONYMOUS_CODING(LOW|SILENT|cgG/cgA|R219|649|Ace|protein_coding|CODING|FBtr0300486|)]	-
3R_9005935_SNP	A	C	A	0.5	76	76	0.1521	8.668e-08	1.14643e-08	0.1371	1.42e-06	6.86405e-07	0.1446	1.498e-07	3.25508e-08	0.01503	0.2877	0.269421	SiteClass[|||],TranscriptAnnot[INTERGENIC(MODIFIER|||||||||)]	-
3R_9030755_SNP	C	G	G	0.3484	54	101	-0.1627	3.725e-08	1.34534e-08	-0.1427	1.45e-06	2.6064e-06	-0.1527	1.082e-07	7.76336e-08	-0.01996	0.1551	0.157711	SiteClass[|||],TranscriptAnnot[INTERGENIC(MODIFIER|||||||||)]	-
3R_8979958_SNP	G	A	G	0.487	75	79	0.1538	3.002e-08	2.06898e-08	0.1517	3.624e-08	9.27504e-08	0.1528	1.127e-08	1.41105e-08	0.002186	0.8756	0.871858	SiteClass[FBgn0038118|timeout|INTRON|0;FBgn0260793|2mit|INTRON|0],TranscriptAnnot[INTRON(MODIFIER||||1141|2mit|protein_coding|CODING|FBtr0301436|2);INTRON(MODIFIER||||1155|2mit|protein_coding|CODING|FBtr0330143|2);INTRON(MODIFIER||||1384|timeout|protein_coding|CODING|FBtr0082712|11)]	-
3R_9030746_SNP	A	G	G	0.3442	53	101	-0.1626	4.673e-08	1.50443e-08	-0.1458	1.078e-06	1.55263e-06	-0.1542	9.873e-08	6.01869e-08	-0.01673	0.2479	0.239756	SiteClass[|||],TranscriptAnnot[INTERGENIC(MODIFIER|||||||||)]	-
3R_9013468_SNP	T	C	T	0.3896	60	94	0.1585	1.987e-08	1.69044e-08	0.1401	8.497e-07	3.29714e-06	0.1493	5.254e-08	9.98745e-08	0.01845	0.1958	0.182968	SiteClass[FBgn0038124|CG14380|UPSTREAM|819],TranscriptAnnot[INTERGENIC(MODIFIER|||||||||);UPSTREAM(MODIFIER||||168|CG14380|protein_coding|CODING|FBtr0300768|)]	(TF_binding_site|mE1_TFBS_cad|FBsf0000248251)
3R_8987558_SNP	G	T	T	0.2785	44	114	-0.1643	6.274e-08	1.86252e-08	-0.1345	1.167e-05	6.80186e-06	-0.1494	4.37e-07	1.62372e-07	-0.02974	0.04932	0.0449319	SiteClass[FBgn0038118|timeout|INTRON|0],TranscriptAnnot[INTRON(MODIFIER||||1384|timeout|protein_coding|CODING|FBtr0082712|16)]	-
3R_8990428_SNP	A	C	C	0.1656	26	131	-0.1938	1.942e-07	2.5807e-08	-0.1846	7.44e-07	1.30647e-07	-0.1892	1.591e-07	1.91616e-08	-0.009117	0.6224	0.61336	SiteClass[FBgn0038118|timeout|DOWNSTREAM|830],TranscriptAnnot[DOWNSTREAM(MODIFIER||||1384|timeout|protein_coding|CODING|FBtr0082712|);INTERGENIC(MODIFIER|||||||||)]	-
3R_9030772_SNP	T	A	A	0.3442	53	101	-0.1613	4.451e-08	3.49705e-08	-0.1474	7.054e-07	1.61959e-06	-0.1544	7.608e-08	9.36648e-08	-0.01389	0.3343	0.329486	SiteClass[|||],TranscriptAnnot[INTERGENIC(MODIFIER|||||||||)]	-
2L_18644589_INS	TTGAAAACAGATTTT	T	T	0.2222	34	119	-0.1681	5.186e-07	9.65221e-08	-0.168	5.564e-07	1.20709e-07	-0.1681	2.497e-07	3.69813e-08	-8.714e-05	0.9956	0.995741	SiteClass[FBgn0032694|MESR3|INTRON|0],TranscriptAnnot[INTRON(MODIFIER||||281|MESR3|protein_coding|CODING|FBtr0081073|2);INTRON(MODIFIER||||281|MESR3|protein_coding|CODING|FBtr0329972|1);INTRON(MODIFIER||||299|MESR3|protein_coding|CODING|FBtr0329971|2)]	-
3R_8994268_SNP	T	G	G	0.3974	60	91	0.1629	1.034e-08	3.81003e-08	0.1451	3.708e-07	3.68175e-06	0.154	2.251e-08	1.58416e-07	0.01786	0.2221	0.200333	SiteClass[|||],TranscriptAnnot[INTERGENIC(MODIFIER|||||||||)]	(TF_binding_site|mE1_TFBS_chinmo|FBsf0000212625),(TF_binding_site|mE1_TFBS_HSA|FBsf0000371149)
3R_9035756_DEL	A	AATAATTAACATAATTA	AATAATTAACATAATTA	0.3758	56	93	-0.147	5.429e-07	9.092e-07	-0.1593	3.497e-08	4.00048e-08	-0.1532	5.534e-08	7.26295e-08	0.01231	0.3976	0.386184	SiteClass[FBgn0038126|CG8483|INTRON|0],TranscriptAnnot[INTRON(MODIFIER||||392|CG8483|protein_coding|CODING|FBtr0082782|3)]	-
3R_9018021_SNP	A	T	T	0.2288	35	118	-0.166	5.093e-07	4.81191e-08	-0.1527	3.432e-06	8.4247e-07	-0.1594	5.996e-07	7.54575e-08	-0.01336	0.4166	0.408699	SiteClass[FBgn0038125|CG8141|NON_SYNONYMOUS_CODING|0],TranscriptAnnot[NON_SYNONYMOUS_CODING(MODERATE|MISSENSE|Tgc/Agc|C184S|239|CG8141|protein_coding|CODING|FBtr0082734|)]	-
3R_9048572_SNP	T	C	C	0.4694	69	78	-0.1597	2.44e-08	4.99231e-08	-0.1413	9.195e-07	3.0945e-06	-0.1505	6.12e-08	1.63278e-07	-0.01847	0.1995	0.182629	SiteClass[FBgn0000024|Ace|DOWNSTREAM|101],TranscriptAnnot[DOWNSTREAM(MODIFIER||||636|Ace|protein_coding|CODING|FBtr0335223|);INTERGENIC(MODIFIER|||||||||)]	-
3R_8994147_SNP	C	T	T	0.4304	68	90	0.1497	7.952e-08	5.24445e-08	0.1319	2.063e-06	4.28836e-06	0.1408	1.769e-07	2.02803e-07	0.01778	0.1985	0.186905	SiteClass[|||],TranscriptAnnot[INTERGENIC(MODIFIER|||||||||)]	(TF_binding_site|mE1_TFBS_chinmo|FBsf0000212625),(TF_binding_site|mE1_TFBS_HSA|FBsf0000371149)
3R_9035867_SNP	T	C	C	0.3816	58	94	-0.1508	1.591e-07	2.14122e-07	-0.1504	1.322e-07	1.09866e-07	-0.1506	5.463e-08	5.42185e-08	-0.0004015	0.9779	0.977193	SiteClass[FBgn0038126|CG8483|SYNONYMOUS_CODING|0],TranscriptAnnot[SYNONYMOUS_CODING(LOW|SILENT|ttG/ttA|L157|392|CG8483|protein_coding|CODING|FBtr0082782|)]	-
3R_8994155_SNP	A	C	C	0.4268	67	90	0.1487	1.151e-07	7.193e-08	0.1309	2.846e-06	5.59595e-06	0.1398	2.548e-07	2.77212e-07	0.01783	0.2005	0.187509	SiteClass[|||],TranscriptAnnot[INTERGENIC(MODIFIER|||||||||)]	(TF_binding_site|mE1_TFBS_chinmo|FBsf0000212625),(TF_binding_site|mE1_TFBS_HSA|FBsf0000371149)
3R_8994127_SNP	T	A	A	0.4268	67	90	0.1483	1.19e-07	7.70238e-08	0.1303	3.014e-06	5.88564e-06	0.1393	2.667e-07	2.95366e-07	0.01806	0.195	0.182022	SiteClass[|||],TranscriptAnnot[INTERGENIC(MODIFIER|||||||||)]	(TF_binding_site|mE1_TFBS_chinmo|FBsf0000212625),(TF_binding_site|mE1_TFBS_HSA|FBsf0000371149)
3R_9034291_SNP	T	C	C	0.2065	32	123	-0.1832	7.247e-08	8.85747e-08	-0.1651	1.166e-06	1.14848e-06	-0.1742	1.277e-07	1.22885e-07	-0.01807	0.2742	0.27779	SiteClass[FBgn0038126|CG8483|DOWNSTREAM|185],TranscriptAnnot[DOWNSTREAM(MODIFIER||||392|CG8483|protein_coding|CODING|FBtr0082782|);INTERGENIC(MODIFIER|||||||||)]	(TF_binding_site|mE1_TFBS_HSA|FBsf0000371155),(TF_binding_site|mE1_TFBS_Trl|FBsf0000340966)
3R_9069611_SNP	T	C	T	0.4267	64	86	0.1581	4.061e-08	2.29781e-07	0.1576	4.276e-08	2.95781e-07	0.1578	1.503e-08	9.56457e-08	0.0004906	0.9726	0.971802	SiteClass[FBgn0000024|Ace|SYNONYMOUS_CODING|0],TranscriptAnnot[SYNONYMOUS_CODING(LOW|SILENT|gaA/gaG|E235|636|Ace|protein_coding|CODING|FBtr0335223|);SYNONYMOUS_CODING(LOW|SILENT|gaA/gaG|E235|649|Ace|protein_coding|CODING|FBtr0082780|);SYNONYMOUS_CODING(LOW|SILENT|gaA/gaG|E235|649|Ace|protein_coding|CODING|FBtr0300486|)]	-
3R_9088196_SNP	A	T	A	0.4966	73	74	-0.1657	4.173e-09	1.14105e-07	-0.1519	7.127e-08	2.17648e-06	-0.1588	5.867e-09	2.0126e-07	-0.0138	0.3306	0.319079	SiteClass[FBgn0040551|CG11686|DOWNSTREAM|247;FBgn0038128|Ravus|DOWNSTREAM|258],TranscriptAnnot[DOWNSTREAM(MODIFIER||||359|Ravus|protein_coding|CODING|FBtr0082779|);DOWNSTREAM(MODIFIER||||70|CG11686|protein_coding|CODING|FBtr0082735|);DOWNSTREAM(MODIFIER||||70|CG11686|protein_coding|CODING|FBtr0335222|);INTERGENIC(MODIFIER|||||||||)]	-
3R_9077051_SNP	A	G	G	0.2468	39	119	-0.1771	2.51e-08	1.2922e-07	-0.1627	4.393e-07	1.07784e-06	-0.1699	4.396e-08	1.43945e-07	-0.01437	0.355	0.353594	SiteClass[FBgn0000024|Ace|INTRON|0],TranscriptAnnot[INTRON(MODIFIER||||636|Ace|protein_coding|CODING|FBtr0335223|1);INTRON(MODIFIER||||649|Ace|protein_coding|CODING|FBtr0082780|1);INTRON(MODIFIER||||649|Ace|protein_coding|CODING|FBtr0300486|2)]	-
2L_1197775_SNP	C	T	T	0.1765	27	126	-0.1806	1.442e-06	1.29775e-07	-0.1591	1.961e-05	5.16809e-06	-0.1698	2.873e-06	3.53969e-07	-0.02148	0.2275	0.227296	SiteClass[FBgn0031323|CG5139|DOWNSTREAM|690;FBgn0031322|CG5001|DOWNSTREAM|968],TranscriptAnnot[DOWNSTREAM(MODIFIER||||179|CG5139|protein_coding|CODING|FBtr0077977|);DOWNSTREAM(MODIFIER||||346|CG5001|protein_coding|CODING|FBtr0307057|);DOWNSTREAM(MODIFIER||||350|CG5001|protein_coding|CODING|FBtr0077972|);DOWNSTREAM(MODIFIER||||350|CG5001|protein_coding|CODING|FBtr0307056|);DOWNSTREAM(MODIFIER||||3…	-
3R_9077232_SNP	C	G	G	0.2025	33	130	-0.1856	2.227e-08	3.37559e-07	-0.1815	4.91e-08	4.87738e-07	-0.1835	1.15e-08	1.54044e-07	-0.004183	0.8019	0.7985	SiteClass[FBgn0000024|Ace|INTRON|0],TranscriptAnnot[INTRON(MODIFIER||||636|Ace|protein_coding|CODING|FBtr0335223|1);INTRON(MODIFIER||||649|Ace|protein_coding|CODING|FBtr0082780|1);INTRON(MODIFIER||||649|Ace|protein_coding|CODING|FBtr0300486|2)]	-
3R_9033214_SNP	T	A	A	0.2288	35	118	-0.171	1.388e-07	1.54049e-07	-0.1548	1.952e-06	2.20055e-06	-0.1629	2.143e-07	2.35867e-07	-0.01618	0.3323	0.316581	SiteClass[|||],TranscriptAnnot[INTERGENIC(MODIFIER|||||||||)]	-
3R_9077048_SNP	A	T	T	0.2468	39	119	-0.1767	2.63e-08	1.5714e-07	-0.162	4.661e-07	1.35619e-06	-0.1693	4.644e-08	1.81179e-07	-0.01464	0.3456	0.344599	SiteClass[FBgn0000024|Ace|INTRON|0],TranscriptAnnot[INTRON(MODIFIER||||636|Ace|protein_coding|CODING|FBtr0335223|1);INTRON(MODIFIER||||649|Ace|protein_coding|CODING|FBtr0082780|1);INTRON(MODIFIER||||649|Ace|protein_coding|CODING|FBtr0300486|2)]	-
3R_9017284_SNP	T	C	C	0.2597	40	114	-0.1611	4.297e-07	1.64287e-07	-0.1378	1.329e-05	1.25851e-05	-0.1495	1.234e-06	6.71566e-07	-0.02325	0.1296	0.131116	SiteClass[FBgn0038125|CG8141|UPSTREAM|139],TranscriptAnnot[INTERGENIC(MODIFIER|||||||||);UPSTREAM(MODIFIER||||239|CG8141|protein_coding|CODING|FBtr0082734|)]	(TF_binding_site|BDTNP1_TFBS_twi|FBsf0000264854)
3R_9077233_SNP	C	T	T	0.1875	30	130	-0.1881	3.416e-08	6.6929e-07	-0.1884	4.47e-08	3.81008e-07	-0.1883	1.344e-08	1.95509e-07	0.0003218	0.9852	0.984925	SiteClass[FBgn0000024|Ace|INTRON|0],TranscriptAnnot[INTRON(MODIFIER||||636|Ace|protein_coding|CODING|FBtr0335223|1);INTRON(MODIFIER||||649|Ace|protein_coding|CODING|FBtr0082780|1);INTRON(MODIFIER||||649|Ace|protein_coding|CODING|FBtr0300486|2)]	-
3R_8990410_SNP	T	C	C	0.1474	23	133	-0.1889	1e-06	4.00735e-07	-0.1863	1.639e-06	7.13473e-07	-0.1876	5.727e-07	2.07491e-07	-0.002586	0.8934	0.891658	SiteClass[FBgn0038118|timeout|DOWNSTREAM|812],TranscriptAnnot[DOWNSTREAM(MODIFIER||||1384|timeout|protein_coding|CODING|FBtr0082712|);INTERGENIC(MODIFIER|||||||||)]	-
3R_6348794_INS	GAGG	G	G	0.06667	10	140	-0.2682	2.378e-06	3.27528e-07	-0.2582	6.847e-06	1.18164e-06	-0.2632	2.048e-06	2.4582e-07	-0.009987	0.7175	0.716611	SiteClass[FBgn0001235|hth|INTRON|0],TranscriptAnnot[INTRON(MODIFIER||||218|hth|protein_coding|CODING|FBtr0301345|4);INTRON(MODIFIER||||458|hth|protein_coding|CODING|FBtr0301956|9);INTRON(MODIFIER||||472|hth|protein_coding|CODING|FBtr0082256|10);INTRON(MODIFIER||||487|hth|protein_coding|CODING|FBtr0082255|10)]	-
3R_8999499_SNP	G	T	T	0.4564	68	81	-0.1364	2.498e-06	2.70292e-07	-0.1227	2.086e-05	9.18713e-06	-0.1296	4.078e-06	7.12898e-07	-0.01368	0.3061	0.32182	SiteClass[|||],TranscriptAnnot[INTERGENIC(MODIFIER|||||||||)]	-
3R_9077555_SNP	T	G	G	0.2338	36	118	-0.1592	1.326e-06	2.80859e-06	-0.169	1.802e-07	2.81854e-07	-0.1641	2.058e-07	3.7205e-07	0.009821	0.5512	0.539267	SiteClass[FBgn0000024|Ace|INTRON|0],TranscriptAnnot[INTRON(MODIFIER||||636|Ace|protein_coding|CODING|FBtr0335223|1);INTRON(MODIFIER||||649|Ace|protein_coding|CODING|FBtr0082780|1);INTRON(MODIFIER||||649|Ace|protein_coding|CODING|FBtr0300486|2)]	-
3R_9025266_SNP	A	G	A	0.2208	34	120	0.1688	8.69e-07	2.87939e-07	0.1399	4.759e-05	5.88661e-05	0.1543	3.568e-06	2.23342e-06	0.02889	0.08729	0.075538	SiteClass[|||],TranscriptAnnot[INTERGENIC(MODIFIER|||||||||)]	-
3R_9104280_SNP	T	C	C	0.06832	11	150	-0.2517	2.749e-06	3.28811e-07	-0.2426	6.431e-06	1.7448e-06	-0.2472	2.029e-06	3.05729e-07	-0.009028	0.7363	0.730962	SiteClass[|||],TranscriptAnnot[INTERGENIC(MODIFIER|||||||||)]	-
3R_8990454_SNP	G	T	T	0.1635	26	133	-0.1771	1.701e-06	3.50671e-07	-0.1672	5.948e-06	1.83435e-06	-0.1722	1.522e-06	3.25069e-07	-0.009908	0.5897	0.582431	SiteClass[FBgn0038118|timeout|DOWNSTREAM|856],TranscriptAnnot[DOWNSTREAM(MODIFIER||||1384|timeout|protein_coding|CODING|FBtr0082712|);INTERGENIC(MODIFIER|||||||||)]	-
3R_9012627_SNP	A	C	C	0.1987	30	121	-0.1511	2.613e-05	8.80233e-07	-0.1481	2.651e-05	1.05798e-06	-0.1496	1.518e-05	3.91247e-07	-0.002961	0.8604	0.86287	SiteClass[FBgn0038123|CG8508|UPSTREAM|395],TranscriptAnnot[INTERGENIC(MODIFIER|||||||||);UPSTREAM(MODIFIER||||267|CG8508|protein_coding|CODING|FBtr0082783|)]	-
3R_9078578_SNP	A	G	A	0.46	69	81	0.1535	5.742e-08	5.59549e-07	0.1487	1.141e-07	1.71695e-06	0.1511	2.935e-08	4.00155e-07	0.004797	0.7359	0.727559	SiteClass[FBgn0000024|Ace|INTRON|0],TranscriptAnnot[INTRON(MODIFIER||||636|Ace|protein_coding|CODING|FBtr0335223|1);INTRON(MODIFIER||||649|Ace|protein_coding|CODING|FBtr0082780|1);INTRON(MODIFIER||||649|Ace|protein_coding|CODING|FBtr0300486|2)]	-
3R_8991896_SNP	A	G	A	0.4768	72	79	0.1393	1.237e-06	4.26301e-07	0.1112	0.0001057	0.000158329	0.1253	6.74e-06	4.96355e-06	0.02816	0.0459	0.0385825	SiteClass[|||],TranscriptAnnot[INTERGENIC(MODIFIER|||||||||)]	-
3R_25396143_SNP	A	G	G	0.1019	16	141	0.05193	0.2687	0.135089	-0.05589	0.2341	0.307522	-0.00198	0.9654	0.804384	0.1078	1.007e-06	4.51441e-07	SiteClass[|||],TranscriptAnnot[INTERGENIC(MODIFIER|||||||||)]	(TF_binding_site|mE1_TFBS_chinmo|FBsf0000213683)
3R_9011884_SNP	G	T	G	0.2911	46	112	0.1478	1.396e-06	4.6818e-07	0.1184	0.0001137	0.000117841	0.1331	7.428e-06	4.30962e-06	0.02938	0.0525	0.0446617	SiteClass[FBgn0038123|CG8508|NON_SYNONYMOUS_CODING|0],TranscriptAnnot[NON_SYNONYMOUS_CODING(MODERATE|MISSENSE|Cat/Aat|H103N|267|CG8508|protein_coding|CODING|FBtr0082783|)]	-
3R_9061359_SNP	T	C	T	0.4803	73	79	-0.156	2.946e-08	4.8102e-07	-0.1342	1.969e-06	6.64205e-05	-0.1451	1.06e-07	3.06671e-06	-0.02173	0.1199	0.110035	SiteClass[FBgn0000024|Ace|INTRON|0],TranscriptAnnot[INTRON(MODIFIER||||636|Ace|protein_coding|CODING|FBtr0335223|7);INTRON(MODIFIER||||649|Ace|protein_coding|CODING|FBtr0082780|7);INTRON(MODIFIER||||649|Ace|protein_coding|CODING|FBtr0300486|8)]	-
3R_9038276_SNP	T	A	T	0.2125	34	126	0.1654	9.562e-07	4.95729e-07	0.1504	7.582e-06	1.12684e-05	0.1579	1.296e-06	1.08602e-06	0.01495	0.3707	0.356958	SiteClass[FBgn0038126|CG8483|INTRON|0],TranscriptAnnot[INTRON(MODIFIER||||392|CG8483|protein_coding|CODING|FBtr0082782|1)]	-
2L_6334848_SNP	C	A	A	0.09639	16	150	-0.2152	2.513e-06	2.48447e-06	-0.2206	1.304e-06	5.93594e-07	-0.2179	8.792e-07	5.08905e-07	0.005398	0.8054	0.807098	SiteClass[FBgn0031799|Pez|SYNONYMOUS_CODING|0],TranscriptAnnot[SYNONYMOUS_CODING(LOW|SILENT|ccT/ccG|P816|1252|Pez|protein_coding|CODING|FBtr0079284|);SYNONYMOUS_CODING(LOW|SILENT|ccT/ccG|P816|1252|Pez|protein_coding|CODING|FBtr0331226|)]	(TF_binding_site|mE1_TFBS_cad|FBsf0000241510),(TF_binding_site|mE1_TFBS_chinmo|FBsf0000207348)
3R_9076807_SNP	A	C	C	0.1548	24	131	-0.2014	1.47e-07	8.72829e-07	-0.1924	4.178e-07	1.85584e-06	-0.1969	1.047e-07	5.28088e-07	-0.008962	0.6287	0.631036	SiteClass[FBgn0000024|Ace|INTRON|0],TranscriptAnnot[INTRON(MODIFIER||||636|Ace|protein_coding|CODING|FBtr0335223|1);INTRON(MODIFIER||||649|Ace|protein_coding|CODING|FBtr0082780|1);INTRON(MODIFIER||||649|Ace|protein_coding|CODING|FBtr0300486|2)]	-
3R_11587786_SNP	G	A	A	0.07317	12	152	-0.2064	7.844e-05	0.000345371	-0.2674	1.842e-07	5.53611e-07	-0.2369	2.422e-06	9.41746e-06	0.06101	0.01453	0.0146267	SiteClass[|||],TranscriptAnnot[INTERGENIC(MODIFIER|||||||||)]	-
3R_9120655_SNP	G	A	A	0.3377	51	100	-0.1549	2.378e-07	1.95258e-06	-0.1624	4.091e-08	9.30722e-07	-0.1587	3.78e-08	5.63325e-07	0.007562	0.6114	0.600983	SiteClass[FBgn0038135|CG8773|SYNONYMOUS_CODING|0],TranscriptAnnot[SYNONYMOUS_CODING(LOW|SILENT|gaA/gaG|E48|994|CG8773|protein_coding|CODING|FBtr0290037|)]	(TF_binding_site|BDTNP1_TFBS_da|FBsf0000329062),(TF_binding_site|BDTNP1_TFBS_dl|FBsf0000311420),(TF_binding_site|BDTNP1_TFBS_hb|FBsf0000292448),(TF_binding_site|BDTNP1_TFBS_Med|FBsf0000285186),(TF_binding_site|BDTNP1_TFBS_sna|FBsf0000270955),(TF_binding_site|BDTNP1_TFBS_twi|FBsf0000264861),(TF_binding_site|mE1_TFBS_cad|FBsf0000248255),(TF_binding_site|mE1_TFBS_chinmo|FBsf0000212629),(TF_binding_s…
3R_8998807_SNP	C	A	A	0.09259	15	147	-0.201	2.321e-05	2.93018e-06	-0.2171	4.129e-06	6.20876e-07	-0.209	5.419e-06	5.7118e-07	0.01604	0.4757	0.481091	SiteClass[|||],TranscriptAnnot[INTERGENIC(MODIFIER|||||||||)]	-
2R_12630129_SNP	C	G	G	0.06667	11	154	-0.232	1.744e-05	2.0412e-06	-0.2378	1.03e-05	1.0166e-06	-0.2349	7.085e-06	6.04678e-07	0.005763	0.8281	0.826129	SiteClass[|||],TranscriptAnnot[INTERGENIC(MODIFIER|||||||||)]	-
3R_9037591_SNP	G	A	A	0.4052	62	91	-0.1364	2.283e-06	2.04175e-06	-0.1383	1.225e-06	1.05564e-06	-0.1373	7.657e-07	6.16903e-07	0.001912	0.8932	0.890136	SiteClass[FBgn0038126|CG8483|INTRON|0],TranscriptAnnot[INTRON(MODIFIER||||392|CG8483|protein_coding|CODING|FBtr0082782|1)]	-
3R_9188851_SNP	C	T	C	0.4387	68	87	-0.1509	9.8e-08	6.32103e-07	-0.1317	3.874e-06	5.35387e-05	-0.1413	2.974e-07	3.06694e-06	-0.01917	0.1631	0.157768	SiteClass[FBgn0086371|poly|INTRON|0],TranscriptAnnot[INTRON(MODIFIER||||251|poly|protein_coding|CODING|FBtr0082772|1);INTRON(MODIFIER||||251|poly|protein_coding|CODING|FBtr0303265|1)]	-
2L_20858283_SNP	T	A	A	0.3812	61	99	-0.1163	3.551e-05	0.000119191	-0.1437	3.097e-07	6.43491e-07	-0.13	1.841e-06	5.13861e-06	0.02745	0.04541	0.0435818	SiteClass[FBgn0032896|CG14400|UPSTREAM|392;FBgn0032897|CG9336|UPSTREAM|412],TranscriptAnnot[INTERGENIC(MODIFIER|||||||||);UPSTREAM(MODIFIER||||115|CG9336|protein_coding|CODING|FBtr0307498|);UPSTREAM(MODIFIER||||148|CG9336|protein_coding|CODING|FBtr0081427|);UPSTREAM(MODIFIER||||246|CG14400|protein_coding|CODING|FBtr0081449|)]	(TF_binding_site|BDTNP1_TFBS_z|FBsf0000196299),(TF_binding_site|mE1_TFBS_cnc|FBsf0000206293),(TF_binding_site|mE1_TFBS_HSA|FBsf0000352930),(TF_binding_site|mE1_TFBS_HSA|FBsf0000352931)
3R_8986803_SNP	A	G	G	0.09938	16	145	-0.2013	1.09e-05	1.50641e-06	-0.2025	8.474e-06	1.62504e-06	-0.2019	5.051e-06	6.57881e-07	0.001183	0.9575	0.957415	SiteClass[FBgn0038118|timeout|INTRON|0],TranscriptAnnot[INTRON(MODIFIER||||1384|timeout|protein_coding|CODING|FBtr0082712|14)]	-
2L_18644622_SNP	G	A	A	0.2185	33	118	-0.1567	2.417e-06	3.17934e-06	-0.1649	9.449e-07	7.89067e-07	-0.1608	7.22e-07	6.76764e-07	0.008158	0.6123	0.622049	SiteClass[FBgn0032694|MESR3|INTRON|0],TranscriptAnnot[INTRON(MODIFIER||||281|MESR3|protein_coding|CODING|FBtr0081073|2);INTRON(MODIFIER||||281|MESR3|protein_coding|CODING|FBtr0329972|1);INTRON(MODIFIER||||299|MESR3|protein_coding|CODING|FBtr0329971|2)]	-
X_17322212_SNP	T	C	C	0.07362	12	151	0.06875	0.2024	0.0914466	-0.05183	0.3328	0.506668	0.00846	0.8717	0.596188	0.1206	4.075e-07	7.14599e-07	SiteClass[FBgn0030839|CG5613|SYNONYMOUS_CODING|0;FBgn0040877|CG12994|INTRON|0],TranscriptAnnot[INTRON(MODIFIER||||67|CG12994|protein_coding|CODING|FBtr0074438|1);SYNONYMOUS_CODING(LOW|SILENT|gtC/gtT|V453|592|CG5613|protein_coding|CODING|FBtr0074432|);SYNONYMOUS_CODING(LOW|SILENT|gtC/gtT|V516|655|CG5613|protein_coding|CODING|FBtr0074431|)]	(TF_binding_site|BDTNP1_TFBS_Mad|FBsf0000289598),(TF_binding_site|mE1_TFBS_chinmo|FBsf0000209068)
3R_9036002_SNP	A	C	A	0.3571	55	99	0.1508	2.109e-07	7.20596e-07	0.1339	4.479e-06	5.56108e-06	0.1424	4.431e-07	8.77492e-07	0.01696	0.2453	0.229229	SiteClass[FBgn0038126|CG8483|SYNONYMOUS_CODING|0],TranscriptAnnot[SYNONYMOUS_CODING(LOW|SILENT|ccT/ccG|P112|392|CG8483|protein_coding|CODING|FBtr0082782|)]	-
3R_6407337_SNP	T	C	C	0.1111	17	136	-0.1924	1.942e-05	7.36386e-07	-0.1404	0.00184	0.000166481	-0.1664	0.0001487	6.60044e-06	-0.05203	0.01145	0.0152292	SiteClass[FBgn0001235|hth|DOWNSTREAM|863],TranscriptAnnot[DOWNSTREAM(MODIFIER||||266|hth|protein_coding|CODING|FBtr0100454|);INTRON(MODIFIER||||458|hth|protein_coding|CODING|FBtr0301956|5);INTRON(MODIFIER||||472|hth|protein_coding|CODING|FBtr0082256|6);INTRON(MODIFIER||||487|hth|protein_coding|CODING|FBtr0082255|6)]	-
3R_9005683_SNP	C	T	T	0.08642	14	148	-0.2135	9.964e-06	7.52679e-07	-0.1672	0.000607	7.34365e-05	-0.1904	5.287e-05	4.03565e-06	-0.0463	0.05027	0.0476091	SiteClass[|||],TranscriptAnnot[INTERGENIC(MODIFIER|||||||||)]	-
3R_9102363_SNP	A	T	T	0.4392	65	83	-0.1545	2.716e-08	7.72828e-07	-0.1494	9.02e-08	4.34643e-06	-0.152	1.668e-08	7.92371e-07	-0.005101	0.7226	0.714033	SiteClass[|||],TranscriptAnnot[INTERGENIC(MODIFIER|||||||||)]	(TF_binding_site|BDTNP1_TFBS_prd|FBsf0000276479),(TF_binding_site|mE1_TFBS_HSA|FBsf0000371167)
3R_9100401_SNP	T	A	T	0.2848	43	108	0.153	1.22e-06	7.8687e-07	0.1463	3.266e-06	5.60012e-06	0.1497	1.013e-06	9.2172e-07	0.00666	0.6515	0.660329	SiteClass[|||],TranscriptAnnot[INTERGENIC(MODIFIER|||||||||)]	-
3L_3771744_SNP	A	T	A	0.0641	10	146	0.09419	0.107	0.0665434	-0.0367	0.5323	0.561397	0.02875	0.6139	0.517002	0.1309	1.697e-06	7.99175e-07	SiteClass[FBgn0052264|CG32264|INTRON|0],TranscriptAnnot[INTRON(MODIFIER||||1008|CG32264|protein_coding|CODING|FBtr0073187|2);INTRON(MODIFIER||||759|CG32264|protein_coding|CODING|FBtr0332986|1);INTRON(MODIFIER||||822|CG32264|protein_coding|CODING|FBtr0308639|2);INTRON(MODIFIER||||927|CG32264|protein_coding|CODING|FBtr0332987|1);INTRON(MODIFIER||||937|CG32264|protein_coding|CODING|FBtr0308637|1);IN…	-
3R_8980033_SNP	G	A	A	0.3875	62	98	-0.1383	9.054e-07	8.11627e-07	-0.1302	4.556e-06	1.27305e-05	-0.1342	9.927e-07	1.4923e-06	-0.008139	0.5526	0.550546	SiteClass[FBgn0038118|timeout|INTRON|0;FBgn0260793|2mit|INTRON|0],TranscriptAnnot[INTRON(MODIFIER||||1141|2mit|protein_coding|CODING|FBtr0301436|2);INTRON(MODIFIER||||1155|2mit|protein_coding|CODING|FBtr0330143|2);INTRON(MODIFIER||||1384|timeout|protein_coding|CODING|FBtr0082712|11)]	-
3R_18610597_SNP	A	C	C	0.05096	8	149	0.0179	0.7879	0.609088	-0.1269	0.05518	0.117313	-0.0545	0.4	0.590299	0.1448	5.411e-07	8.82017e-07	SiteClass[FBgn0039026|CG7029|INTRON|0],TranscriptAnnot[INTRON(MODIFIER||||1463|CG7029|protein_coding|CODING|FBtr0310036|2);INTRON(MODIFIER||||1471|CG7029|protein_coding|CODING|FBtr0310038|2);INTRON(MODIFIER||||1506|CG7029|protein_coding|CODING|FBtr0310039|2);INTRON(MODIFIER||||1517|CG7029|protein_coding|CODING|FBtr0113270|2);INTRON(MODIFIER||||1517|CG7029|protein_coding|CODING|FBtr0113271|2);INTR…	(TF_binding_site|BDTNP1_TFBS_dl|FBsf0000313483),(TF_binding_site|BDTNP1_TFBS_Med|FBsf0000286243),(TF_binding_site|BDTNP1_TFBS_twi|FBsf0000265808),(TF_binding_site|mE1_TFBS_HSA|FBsf0000374261)
3R_11587775_DEL	C	CAGAAGATG	CAGAAGATG	0.07273	12	153	-0.2041	0.0001077	0.000499719	-0.2652	2.859e-07	8.9839e-07	-0.2347	3.667e-06	1.48654e-05	0.06111	0.01406	0.0144313	SiteClass[|||],TranscriptAnnot[INTERGENIC(MODIFIER|||||||||)]	-
3R_9031458_SNP	C	G	G	0.2027	30	118	-0.1846	2.395e-07	9.24772e-07	-0.1535	1.738e-05	0.000308318	-0.169	1.065e-06	1.07982e-05	-0.03109	0.0753	0.0691204	SiteClass[|||],TranscriptAnnot[INTERGENIC(MODIFIER|||||||||)]	-
3R_9101779_SNP	G	T	T	0.1375	22	138	-0.1917	9.284e-07	1.57861e-06	-0.1875	1.384e-06	2.98993e-06	-0.1896	4.856e-07	9.37679e-07	-0.004232	0.8305	0.826434	SiteClass[|||],TranscriptAnnot[INTERGENIC(MODIFIER|||||||||)]	-
3R_9048838_SNP	T	C	C	0.38	57	93	-0.1472	4.129e-07	9.42951e-07	-0.1193	4.267e-05	0.000140168	-0.1333	2.416e-06	6.663e-06	-0.02788	0.04622	0.0473395	SiteClass[FBgn0000024|Ace|UTR_3_PRIME|0],TranscriptAnnot[UTR_3_PRIME(MODIFIER||||636|Ace|protein_coding|CODING|FBtr0335223|10)]	-
3R_9026809_SNP	A	T	T	0.07738	13	155	-0.2175	1.553e-05	4.94634e-06	-0.2305	3.84e-06	1.19651e-06	-0.224	4.035e-06	1.0743e-06	0.01305	0.594	0.590652	SiteClass[|||],TranscriptAnnot[INTERGENIC(MODIFIER|||||||||)]	-
3R_8387416_SNP	T	A	A	0.05422	9	157	-0.01445	0.8148	0.970287	-0.1502	0.01349	0.0174934	-0.0823	0.1671	0.216869	0.1357	1.545e-06	1.0824e-06	SiteClass[FBgn0038063|Octbeta2R|UPSTREAM|528],TranscriptAnnot[UPSTREAM(MODIFIER||||536|Octbeta2R|protein_coding|CODING|FBtr0100019|);UPSTREAM(MODIFIER||||630|Octbeta2R|protein_coding|CODING|FBtr0330120|);UTR_5_PRIME(MODIFIER||||536|Octbeta2R|protein_coding|CODING|FBtr0304844|2);UTR_5_PRIME(MODIFIER||||536|Octbeta2R|protein_coding|CODING|FBtr0304845|2);UTR_5_PRIME(MODIFIER||||536|Octbeta2R|protein…	-
3R_9036107_SNP	G	C	G	0.3618	55	97	0.1475	3.935e-07	1.12571e-06	0.1251	2.251e-05	5.78931e-05	0.1363	1.555e-06	4.24869e-06	0.02236	0.1263	0.113719	SiteClass[FBgn0038126|CG8483|INTRON|0],TranscriptAnnot[INTRON(MODIFIER||||392|CG8483|protein_coding|CODING|FBtr0082782|2)]	-
3R_9188878_DEL	GAGAGTAAACAAG	G	GAGAGTAAACAAG	0.434	69	90	-0.1467	1.684e-07	1.19062e-06	-0.1258	8.042e-06	0.000106209	-0.1363	6.005e-07	6.28321e-06	-0.02088	0.1199	0.119325	SiteClass[FBgn0086371|poly|INTRON|0],TranscriptAnnot[INTRON(MODIFIER||||251|poly|protein_coding|CODING|FBtr0082772|1);INTRON(MODIFIER||||251|poly|protein_coding|CODING|FBtr0303265|1)]	-
X_10576880_SNP	T	C	C	0.3312	52	105	-0.1321	6.1e-06	1.2428e-06	-0.1221	3.506e-05	1.48477e-05	-0.1271	7.779e-06	2.02097e-06	-0.009941	0.4979	0.485279	SiteClass[FBgn0052677|X11Lbeta|INTRON|0],TranscriptAnnot[INTRON(MODIFIER||||2063|X11Lbeta|protein_coding|CODING|FBtr0310298|3);INTRON(MODIFIER||||2139|X11Lbeta|protein_coding|CODING|FBtr0071493|3)]	-
3R_9071406_SNP	A	T	T	0.4333	65	85	-0.1498	1.974e-07	1.28882e-06	-0.1329	4.248e-06	5.23534e-05	-0.1414	4.124e-07	4.27574e-06	-0.01689	0.2451	0.221775	SiteClass[FBgn0000024|Ace|INTRON|0],TranscriptAnnot[INTRON(MODIFIER||||636|Ace|protein_coding|CODING|FBtr0335223|2);INTRON(MODIFIER||||649|Ace|protein_coding|CODING|FBtr0082780|2);INTRON(MODIFIER||||649|Ace|protein_coding|CODING|FBtr0300486|3)]	-
3R_12236110_SNP	T	C	C	0.1088	16	131	-0.2011	2.744e-05	3.6187e-06	-0.2088	1.094e-05	2.36928e-06	-0.2049	9.5e-06	1.29295e-06	0.007712	0.7396	0.729011	SiteClass[|||],TranscriptAnnot[INTERGENIC(MODIFIER|||||||||)]	-
3R_9048808_SNP	C	G	G	0.4966	74	75	-0.1408	9.217e-07	1.30356e-06	-0.1264	1.093e-05	4.61355e-05	-0.1336	1.573e-06	3.99068e-06	-0.0144	0.3104	0.29517	SiteClass[FBgn0000024|Ace|UTR_3_PRIME|0],TranscriptAnnot[UTR_3_PRIME(MODIFIER||||636|Ace|protein_coding|CODING|FBtr0335223|10)]	-
3R_9048849_SNP	A	C	A	0.4966	73	74	-0.1439	4.775e-07	1.33415e-06	-0.1247	1.47e-05	0.000102212	-0.1343	1.402e-06	6.48292e-06	-0.01922	0.1636	0.164648	SiteClass[FBgn0000024|Ace|UTR_3_PRIME|0],TranscriptAnnot[UTR_3_PRIME(MODIFIER||||636|Ace|protein_coding|CODING|FBtr0335223|10)]	-
3R_9068054_SNP	C	T	T	0.4371	66	85	-0.1583	3.918e-08	1.43797e-06	-0.1517	1.223e-07	6.86447e-06	-0.155	2.722e-08	1.41035e-06	-0.006611	0.635	0.631626	SiteClass[FBgn0000024|Ace|INTRON|0],TranscriptAnnot[INTRON(MODIFIER||||636|Ace|protein_coding|CODING|FBtr0335223|5);INTRON(MODIFIER||||649|Ace|protein_coding|CODING|FBtr0082780|5);INTRON(MODIFIER||||649|Ace|protein_coding|CODING|FBtr0300486|6)]	-
3R_8965839_SNP	T	C	C	0.3716	55	93	0.1373	4.053e-06	1.45879e-06	0.1284	1.696e-05	1.31195e-05	0.1328	4.213e-06	2.04365e-06	0.008825	0.5531	0.536916	SiteClass[FBgn0038118|timeout|INTRON|0;FBgn0260793|2mit|INTRON|0],TranscriptAnnot[INTRON(MODIFIER||||1141|2mit|protein_coding|CODING|FBtr0301436|2);INTRON(MODIFIER||||1155|2mit|protein_coding|CODING|FBtr0330143|2);INTRON(MODIFIER||||1384|timeout|protein_coding|CODING|FBtr0082712|11)]	-
3R_9005555_SNP	C	T	T	0.07362	12	151	-0.2163	3.466e-05	1.46693e-06	-0.152	0.003668	0.000398608	-0.1842	0.0002923	1.57015e-05	-0.06431	0.008298	0.010013	SiteClass[|||],TranscriptAnnot[INTERGENIC(MODIFIER|||||||||)]	-
3L_9900525_SNP	A	T	T	0.1812	29	131	-0.1591	9.928e-06	1.48121e-06	-0.1322	0.0002416	5.1569e-05	-0.1456	3.142e-05	4.53678e-06	-0.02688	0.1145	0.117899	SiteClass[FBgn0085385|CG34356|UPSTREAM|695],TranscriptAnnot[INTERGENIC(MODIFIER|||||||||);UPSTREAM(MODIFIER||||834|CG34356|protein_coding|CODING|FBtr0331577|);UPSTREAM(MODIFIER||||854|CG34356|protein_coding|CODING|FBtr0331579|)]	-
2R_8178352_SNP	T	A	A	0.06548	11	157	-0.2361	1.455e-05	1.41317e-05	-0.2545	2.215e-06	1.53511e-06	-0.2453	3.163e-06	2.20627e-06	0.01838	0.4641	0.482983	SiteClass[FBgn0261611|CG42700|INTRON|0],TranscriptAnnot[INTRON(MODIFIER||||361|CG42700|protein_coding|CODING|FBtr0332922|1);INTRON(MODIFIER||||370|CG42700|protein_coding|CODING|FBtr0302922|1);UTR_5_PRIME(MODIFIER||||364|CG42700|protein_coding|CODING|FBtr0332923|1);UTR_5_PRIME(MODIFIER||||415|CG42700|protein_coding|CODING|FBtr0332924|1);UTR_5_PRIME(MODIFIER||||500|CG42700|protein_coding|CODING|FBt…	-
3R_8852426_SNP	A	T	T	0.1776	27	125	-0.134	0.0004098	0.000199356	-0.1696	5.074e-06	1.61639e-06	-0.1518	3.106e-05	1.08642e-05	0.03569	0.04889	0.0442014	SiteClass[FBgn0038111|CG12360|DOWNSTREAM|387;FBgn0020496|CtBP|DOWNSTREAM|429],TranscriptAnnot[DOWNSTREAM(MODIFIER||||379|CtBP|protein_coding|CODING|FBtr0334516|);DOWNSTREAM(MODIFIER||||473|CtBP|protein_coding|CODING|FBtr0334514|);DOWNSTREAM(MODIFIER||||476|CtBP|protein_coding|CODING|FBtr0100161|);DOWNSTREAM(MODIFIER||||476|CtBP|protein_coding|CODING|FBtr0334517|);DOWNSTREAM(MODIFIER||||481|CtBP|p…	-
3R_8887721_SNP	T	G	G	0.2297	34	114	-0.1698	6.066e-07	1.62543e-06	-0.149	9.71e-06	3.31226e-05	-0.1594	1.134e-06	3.66781e-06	-0.02076	0.2265	0.205234	SiteClass[FBgn0004666|sim|INTRON|0],TranscriptAnnot[INTRON(MODIFIER||||664|sim|protein_coding|CODING|FBtr0082711|1);INTRON(MODIFIER||||672|sim|protein_coding|CODING|FBtr0334614|1);UPSTREAM(MODIFIER||||675|sim|protein_coding|CODING|FBtr0334613|)]	-
3R_9035837_SNP	G	A	A	0.3826	57	92	-0.1393	1.585e-06	4.64726e-06	-0.1384	1.3e-06	2.82363e-06	-0.1389	6.172e-07	1.62605e-06	-0.0008855	0.9521	0.950185	SiteClass[FBgn0038126|CG8483|SYNONYMOUS_CODING|0],TranscriptAnnot[SYNONYMOUS_CODING(LOW|SILENT|gaT/gaC|D167|392|CG8483|protein_coding|CODING|FBtr0082782|)]	-
3R_9017172_SNP	T	C	T	0.4067	61	89	0.1402	1.888e-06	1.62742e-06	0.1174	6.92e-05	0.000168532	0.1288	6.586e-06	9.65475e-06	0.02283	0.1107	0.100887	SiteClass[FBgn0038125|CG8141|UPSTREAM|251],TranscriptAnnot[INTERGENIC(MODIFIER|||||||||);UPSTREAM(MODIFIER||||239|CG8141|protein_coding|CODING|FBtr0082734|)]	(TF_binding_site|BDTNP1_TFBS_twi|FBsf0000264854)
3R_10182916_SNP	T	C	C	0.1935	30	125	-0.1694	1.872e-06	2.34732e-05	-0.1855	1.85e-07	1.62957e-06	-0.1775	2.662e-07	3.04196e-06	0.01605	0.3544	0.34697	SiteClass[FBgn0024321|NK7.1|INTRON|0],TranscriptAnnot[INTRON(MODIFIER||||721|NK7.1|protein_coding|CODING|FBtr0082941|1);INTRON(MODIFIER||||721|NK7.1|protein_coding|CODING|FBtr0082942|2);INTRON(MODIFIER||||721|NK7.1|protein_coding|CODING|FBtr0306742|2)]	-
3R_9027475_SNP	G	A	G	0.2484	39	118	0.1575	1.156e-06	1.67302e-06	0.128	8.12e-05	0.000421639	0.1427	5.767e-06	1.72821e-05	0.02954	0.05853	0.0557959	SiteClass[|||],TranscriptAnnot[INTERGENIC(MODIFIER|||||||||)]	-
3R_8999508_SNP	G	T	T	0.4408	67	85	-0.133	4.211e-06	1.79163e-06	-0.1189	3.735e-05	4.18556e-05	-0.126	7.205e-06	4.41017e-06	-0.01407	0.2991	0.305013	SiteClass[|||],TranscriptAnnot[INTERGENIC(MODIFIER|||||||||)]	-
3R_8859567_SNP	C	T	T	0.09375	15	145	-0.1752	0.0002975	2.5582e-05	-0.2063	1.495e-05	1.79409e-06	-0.1907	4.516e-05	3.3542e-06	0.03119	0.1573	0.170231	SiteClass[FBgn0003308|ry|SYNONYMOUS_CODING|0],TranscriptAnnot[SYNONYMOUS_CODING(LOW|SILENT|ggT/ggC|G90|1335|ry|protein_coding|CODING|FBtr0082704|)]	(TF_binding_site|BDTNP1_TFBS_dl|FBsf0000311386),(TF_binding_site|BDTNP1_TFBS_twi|FBsf0000264843),(TF_binding_site|mE1_TFBS_cad|FBsf0000248245),(TF_binding_site|mE1_TFBS_chinmo|FBsf0000212619),(TF_binding_site|mE1_TFBS_HSA|FBsf0000371116)
3R_9001585_SNP	T	C	C	0.1384	22	137	-0.1709	1.953e-05	2.75123e-06	-0.1649	3.686e-05	5.74012e-06	-0.1679	1.484e-05	1.79543e-06	-0.005924	0.7629	0.758948	SiteClass[|||],TranscriptAnnot[INTERGENIC(MODIFIER|||||||||)]	-
3R_9032994_INS	C	CCTGGGAAATGGC	C	0.2313	34	113	0.1597	3.5e-06	1.81384e-06	0.149	1.114e-05	9.7274e-06	0.1543	3.801e-06	1.93171e-06	0.01078	0.4559	0.511994	SiteClass[|||],TranscriptAnnot[INTERGENIC(MODIFIER|||||||||)]	-
3R_9016474_SNP	C	T	T	0.4286	66	88	-0.1331	2.999e-06	1.85413e-06	-0.1184	3.131e-05	5.58198e-05	-0.1258	5.012e-06	5.30758e-06	-0.01471	0.3039	0.281583	SiteClass[FBgn0038125|CG8141|UPSTREAM|949],TranscriptAnnot[INTERGENIC(MODIFIER|||||||||);UPSTREAM(MODIFIER||||239|CG8141|protein_coding|CODING|FBtr0082734|)]	(TF_binding_site|BDTNP1_TFBS_twi|FBsf0000264854)
3R_9111214_SNP	C	T	T	0.2436	38	118	-0.1587	8.647e-07	1.861e-06	-0.1306	4.425e-05	0.000139818	-0.1446	3.533e-06	9.18716e-06	-0.02806	0.06642	0.0721552	SiteClass[FBgn0038131|CG15888|SYNONYMOUS_CODING|0;FBgn0038130|CG8630|DOWNSTREAM|965],TranscriptAnnot[DOWNSTREAM(MODIFIER||||408|CG8630|protein_coding|CODING|FBtr0082737|);SYNONYMOUS_CODING(LOW|SILENT|gcA/gcG|A172|319|CG15888|protein_coding|CODING|FBtr0100257|)]	-
3R_8966061_SNP	T	C	C	0.3526	55	101	0.13	1.023e-05	1.88029e-06	0.1214	3.666e-05	1.5645e-05	0.1257	1.064e-05	2.56984e-06	0.008529	0.5535	0.54471	SiteClass[FBgn0038118|timeout|INTRON|0;FBgn0260793|2mit|INTRON|0],TranscriptAnnot[INTRON(MODIFIER||||1141|2mit|protein_coding|CODING|FBtr0301436|2);INTRON(MODIFIER||||1155|2mit|protein_coding|CODING|FBtr0330143|2);INTRON(MODIFIER||||1384|timeout|protein_coding|CODING|FBtr0082712|11)]	-
2R_8178075_SNP	A	G	G	0.06509	11	158	-0.2066	0.0001589	0.00021309	-0.2551	2.24e-06	1.88394e-06	-0.2308	1.186e-05	1.21617e-05	0.04851	0.0649	0.0629226	SiteClass[FBgn0261611|CG42700|INTRON|0],TranscriptAnnot[INTRON(MODIFIER||||361|CG42700|protein_coding|CODING|FBtr0332922|1);INTRON(MODIFIER||||370|CG42700|protein_coding|CODING|FBtr0302922|1);UPSTREAM(MODIFIER||||364|CG42700|protein_coding|CODING|FBtr0332923|);UPSTREAM(MODIFIER||||415|CG42700|protein_coding|CODING|FBtr0332924|);UPSTREAM(MODIFIER||||500|CG42700|protein_coding|CODING|FBtr0302923|)]	-
3R_9082579_SNP	C	G	G	0.1595	26	137	-0.1853	3.858e-07	5.0922e-06	-0.1844	4.101e-07	3.40082e-06	-0.1848	1.625e-07	1.88588e-06	-0.0009035	0.9606	0.959939	SiteClass[FBgn0000024|Ace|INTRON|0],TranscriptAnnot[INTRON(MODIFIER||||636|Ace|protein_coding|CODING|FBtr0335223|1);INTRON(MODIFIER||||649|Ace|protein_coding|CODING|FBtr0082780|1);INTRON(MODIFIER||||649|Ace|protein_coding|CODING|FBtr0300486|2)]	-
3R_14257061_SNP	T	A	A	0.07362	12	151	-0.2569	7.333e-07	1.9968e-06	-0.2104	5.719e-05	0.000157381	-0.2337	3.719e-06	1.02072e-05	-0.0465	0.0676	0.0637884	SiteClass[FBgn0004652|fru|INTRON|0],TranscriptAnnot[INTRON(MODIFIER||||516|fru|protein_coding|CODING|FBtr0083646|5);INTRON(MODIFIER||||688|fru|protein_coding|CODING|FBtr0083644|6);INTRON(MODIFIER||||695|fru|protein_coding|CODING|FBtr0083640|6);INTRON(MODIFIER||||705|fru|protein_coding|CODING|FBtr0083650|6);INTRON(MODIFIER||||789|fru|protein_coding|CODING|FBtr0083641|6);INTRON(MODIFIER||||796|fru|…	(TF_binding_site|mE1_TFBS_cad|FBsf0000248695)
3R_9027419_SNP	G	A	G	0.2468	38	116	0.1579	1.637e-06	2.03249e-06	0.1307	6.318e-05	0.000248569	0.1443	5.963e-06	1.36085e-05	0.02721	0.0801	0.0820174	SiteClass[|||],TranscriptAnnot[INTERGENIC(MODIFIER|||||||||)]	-
3R_9027463_SNP	C	T	C	0.2564	40	116	0.1562	1.267e-06	2.03704e-06	0.1241	0.0001227	0.000506028	0.1402	7.524e-06	2.12304e-05	0.03206	0.0425	0.0363258	SiteClass[|||],TranscriptAnnot[INTERGENIC(MODIFIER|||||||||)]	-
3R_9029138_SNP	A	T	A	0.2166	34	123	0.1616	1.8e-06	2.04876e-06	0.1327	9.089e-05	0.000341596	0.1472	7.388e-06	1.66323e-05	0.02887	0.08404	0.0749833	SiteClass[|||],TranscriptAnnot[INTERGENIC(MODIFIER|||||||||)]	-
3R_9027357_SNP	T	C	T	0.242	38	119	0.1508	4.405e-06	2.11358e-06	0.1174	0.0003607	0.000860399	0.1341	2.607e-05	3.03157e-05	0.0334	0.03698	0.031831	SiteClass[|||],TranscriptAnnot[INTERGENIC(MODIFIER|||||||||)]	-
3R_9017454_SNP	G	C	C	0.2166	34	123	-0.1649	9.762e-07	2.13906e-06	-0.1398	3.573e-05	9.49539e-05	-0.1524	3.231e-06	7.79031e-06	-0.02514	0.1277	0.12137	SiteClass[FBgn0038125|CG8141|NON_SYNONYMOUS_CODING|0],TranscriptAnnot[NON_SYNONYMOUS_CODING(MODERATE|MISSENSE|cCa/cGa|P11R|239|CG8141|protein_coding|CODING|FBtr0082734|)]	(TF_binding_site|BDTNP1_TFBS_twi|FBsf0000264854)
3R_8967862_SNP	A	G	G	0.3526	55	101	0.1303	9.724e-06	2.16731e-06	0.1095	0.0002106	0.000145197	0.1199	2.795e-05	1.01105e-05	0.02078	0.147	0.138853	SiteClass[FBgn0038118|timeout|INTRON|0;FBgn0260793|2mit|INTRON|0],TranscriptAnnot[INTRON(MODIFIER||||1141|2mit|protein_coding|CODING|FBtr0301436|2);INTRON(MODIFIER||||1155|2mit|protein_coding|CODING|FBtr0330143|2);INTRON(MODIFIER||||1384|timeout|protein_coding|CODING|FBtr0082712|11)]	-
3L_15115418_SNP	T	C	C	0.06024	10	156	-0.2665	2.109e-06	2.18254e-06	-0.2453	1.287e-05	1.1631e-05	-0.2559	2.764e-06	2.34862e-06	-0.02121	0.4284	0.438832	SiteClass[FBgn0036480|Cep135|INTRON|0;FBgn0036481|CG16959|INTRON|0;FBgn0052847|CG32847|DOWNSTREAM|17],TranscriptAnnot[DOWNSTREAM(MODIFIER||||164|CG32847|protein_coding|CODING|FBtr0075639|);INTRON(MODIFIER||||1059|Cep135|protein_coding|CODING|FBtr0075638|7);INTRON(MODIFIER||||1065|Cep135|protein_coding|CODING|FBtr0303375|7);INTRON(MODIFIER||||489|CG16959|protein_coding|CODING|FBtr0303378|3);INTRON…	(TF_binding_site|BDTNP1_TFBS_twi|FBsf0000203873)
3R_8998438_SNP	T	G	G	0.08228	13	145	-0.2109	3.259e-05	5.34334e-06	-0.2149	2.702e-05	4.30748e-06	-0.2129	1.7e-05	2.19461e-06	0.004024	0.869	0.868699	SiteClass[|||],TranscriptAnnot[INTERGENIC(MODIFIER|||||||||)]	-
3R_9031057_SNP	T	G	G	0.3158	48	104	-0.1382	7.684e-06	2.21348e-06	-0.1305	2.117e-05	1.95272e-05	-0.1344	6.703e-06	3.16593e-06	-0.007697	0.6127	0.599632	SiteClass[|||],TranscriptAnnot[INTERGENIC(MODIFIER|||||||||)]	-
3R_8999551_SNP	T	A	A	0.4533	68	82	-0.1292	7.624e-06	2.26942e-06	-0.1126	8.656e-05	8.29308e-05	-0.1209	1.491e-05	7.3995e-06	-0.01659	0.2337	0.227985	SiteClass[|||],TranscriptAnnot[INTERGENIC(MODIFIER|||||||||)]	-
3R_9120816_SNP	A	G	G	0.1325	22	144	-0.1968	7.68e-07	2.33321e-06	-0.1615	5.526e-05	0.000155966	-0.1791	3.767e-06	1.09363e-05	-0.03528	0.06797	0.0654383	SiteClass[FBgn0038135|CG8773|NON_SYNONYMOUS_CODING|0],TranscriptAnnot[NON_SYNONYMOUS_CODING(MODERATE|MISSENSE|gGt/gAt|G102D|994|CG8773|protein_coding|CODING|FBtr0290037|)]	(TF_binding_site|BDTNP1_TFBS_da|FBsf0000329062),(TF_binding_site|BDTNP1_TFBS_dl|FBsf0000311420),(TF_binding_site|BDTNP1_TFBS_hb|FBsf0000292448),(TF_binding_site|BDTNP1_TFBS_sna|FBsf0000270955),(TF_binding_site|BDTNP1_TFBS_twi|FBsf0000264861),(TF_binding_site|mE1_TFBS_cad|FBsf0000248255),(TF_binding_site|mE1_TFBS_chinmo|FBsf0000212629),(TF_binding_site|mE1_TFBS_HSA|FBsf0000371174)
3R_8859558_SNP	G	T	T	0.1049	17	145	-0.1466	0.001333	0.000188286	-0.1932	1.864e-05	2.34444e-06	-0.1699	0.0001188	1.24923e-05	0.04653	0.02903	0.0296897	SiteClass[FBgn0003308|ry|SYNONYMOUS_CODING|0],TranscriptAnnot[SYNONYMOUS_CODING(LOW|SILENT|acT/acG|T87|1335|ry|protein_coding|CODING|FBtr0082704|)]	(TF_binding_site|BDTNP1_TFBS_dl|FBsf0000311386),(TF_binding_site|BDTNP1_TFBS_twi|FBsf0000264843),(TF_binding_site|mE1_TFBS_cad|FBsf0000248245),(TF_binding_site|mE1_TFBS_chinmo|FBsf0000212619),(TF_binding_site|mE1_TFBS_HSA|FBsf0000371116)
3R_8967508_SNP	A	G	G	0.3775	57	94	0.1396	1.83e-06	2.35865e-06	0.1175	6.545e-05	0.000106295	0.1286	6.202e-06	8.73614e-06	0.02214	0.1248	0.115355	SiteClass[FBgn0038118|timeout|INTRON|0;FBgn0260793|2mit|INTRON|0],TranscriptAnnot[INTRON(MODIFIER||||1141|2mit|protein_coding|CODING|FBtr0301436|2);INTRON(MODIFIER||||1155|2mit|protein_coding|CODING|FBtr0330143|2);INTRON(MODIFIER||||1384|timeout|protein_coding|CODING|FBtr0082712|11)]	-
X_16264179_SNP	T	A	T	0.08025	13	149	-0.1873	0.0002032	2.12734e-05	-0.218	1.099e-05	2.37892e-06	-0.2027	3.038e-05	3.47656e-06	0.03065	0.194	0.206332	SiteClass[FBgn0004227|nonA|INTRON|0],TranscriptAnnot[INTRON(MODIFIER||||742|nonA|protein_coding|CODING|FBtr0074233|4)]	-
3R_9101897_SNP	C	A	A	0.1667	27	135	-0.1748	1.469e-06	3.83706e-06	-0.1719	1.934e-06	6.96887e-06	-0.1733	7.586e-07	2.37996e-06	-0.002895	0.8731	0.870229	SiteClass[|||],TranscriptAnnot[INTERGENIC(MODIFIER|||||||||)]	-
3R_9188833_SNP	G	C	G	0.4481	69	85	-0.1511	1.096e-07	2.40631e-06	-0.1384	8.921e-07	3.79062e-05	-0.1448	1.505e-07	4.82354e-06	-0.01272	0.3253	0.349902	SiteClass[FBgn0086371|poly|INTRON|0],TranscriptAnnot[INTRON(MODIFIER||||251|poly|protein_coding|CODING|FBtr0082772|1);INTRON(MODIFIER||||251|poly|protein_coding|CODING|FBtr0303265|1)]	-
3L_18090494_SNP	T	A	A	0.07407	12	150	-0.2116	4.45e-05	2.43094e-06	-0.1995	0.0001409	1.73424e-05	-0.2055	4.715e-05	3.1059e-06	-0.01208	0.6381	0.631944	SiteClass[FBgn0036773|CG13698|INTRON|0],TranscriptAnnot[INTRON(MODIFIER||||316|CG13698|protein_coding|CODING|FBtr0075137|2);INTRON(MODIFIER||||316|CG13698|protein_coding|CODING|FBtr0333698|1)]	-
3R_13135187_SNP	T	C	C	0.06329	10	148	-0.2703	1.985e-06	2.44256e-06	-0.2467	1.44e-05	2.14341e-05	-0.2585	2.659e-06	3.50916e-06	-0.02356	0.4074	0.390626	SiteClass[|||],TranscriptAnnot[INTERGENIC(MODIFIER|||||||||)]	-
3L_15089201_SNP	T	C	C	0.2484	39	118	-0.1341	3.203e-05	0.00013497	-0.163	2.389e-07	2.47416e-06	-0.1486	1.542e-06	1.04703e-05	0.02891	0.06682	0.0612708	SiteClass[FBgn0027088|Aats-gly|SYNONYMOUS_CODING|0],TranscriptAnnot[SYNONYMOUS_CODING(LOW|SILENT|ggC/ggT|G194|679|Aats-gly|protein_coding|CODING|FBtr0075632|);SYNONYMOUS_CODING(LOW|SILENT|ggC/ggT|G280|765|Aats-gly|protein_coding|CODING|FBtr0075633|);SYNONYMOUS_CODING(LOW|SILENT|ggC/ggT|G280|765|Aats-gly|protein_coding|CODING|FBtr0333934|)]	(TF_binding_site|mE1_TFBS_HSA|FBsf0000365399),(TF_binding_site|mE1_TFBS_sens|FBsf0000224543)
2R_16593225_SNP	A	T	T	0.06875	11	149	-0.2072	0.0001489	1.37834e-05	-0.2295	2.4e-05	2.48753e-06	-0.2184	3.538e-05	2.78089e-06	0.02227	0.4074	0.396012	SiteClass[FBgn0040726|dpr|INTRON|0],TranscriptAnnot[INTRON(MODIFIER||||367|dpr|protein_coding|CODING|FBtr0086238|1)]	-
3R_8980919_SNP	T	A	T	0.4236	61	83	-0.1313	9.309e-06	2.50459e-06	-0.1287	1.395e-05	1.20384e-05	-0.13	6.001e-06	2.57076e-06	-0.002562	0.8597	0.856571	SiteClass[FBgn0038118|timeout|INTRON|0;FBgn0260793|2mit|INTRON|0],TranscriptAnnot[INTRON(MODIFIER||||1141|2mit|protein_coding|CODING|FBtr0301436|1);INTRON(MODIFIER||||1155|2mit|protein_coding|CODING|FBtr0330143|1);INTRON(MODIFIER||||1384|timeout|protein_coding|CODING|FBtr0082712|11)]	(TF_binding_site|mE1_TFBS_sbb|FBsf0000250851)
3R_9956962_SNP	A	T	T	0.1195	19	140	-0.1769	4.024e-05	0.000107655	-0.2044	1.511e-06	2.51553e-06	-0.1906	4.418e-06	9.21301e-06	0.02748	0.1825	0.180003	SiteClass[FBgn0038207|CG14356|INTRON|0],TranscriptAnnot[INTRON(MODIFIER||||151|CG14356|protein_coding|CODING|FBtr0082908|1)]	(TF_binding_site|mE1_TFBS_cad|FBsf0000248324)
3R_8735741_SNP	C	A	A	0.2857	44	110	-0.1328	1.491e-05	3.02422e-05	-0.148	1.576e-06	2.59334e-06	-0.1404	2.434e-06	4.44131e-06	0.0152	0.3189	0.309973	SiteClass[FBgn0038090|CG10909|DOWNSTREAM|101],TranscriptAnnot[DOWNSTREAM(MODIFIER||||349|CG10909|protein_coding|CODING|FBtr0082685|);INTERGENIC(MODIFIER|||||||||)]	-
3R_9061333_SNP	A	G	G	0.1491	24	137	-0.1907	7.979e-07	2.61119e-06	-0.1721	9.481e-06	8.13217e-05	-0.1814	1.396e-06	7.83426e-06	-0.01861	0.3219	0.316474	SiteClass[FBgn0000024|Ace|INTRON|0],TranscriptAnnot[INTRON(MODIFIER||||636|Ace|protein_coding|CODING|FBtr0335223|7);INTRON(MODIFIER||||649|Ace|protein_coding|CODING|FBtr0082780|7);INTRON(MODIFIER||||649|Ace|protein_coding|CODING|FBtr0300486|8)]	-
3R_9188801_INS	T	TT	T	0.4359	68	88	-0.1444	3.586e-07	2.63064e-06	-0.1261	9.796e-06	0.00011568	-0.1353	9.698e-07	9.68709e-06	-0.01838	0.1775	0.174617	SiteClass[FBgn0086371|poly|INTRON|0],TranscriptAnnot[INTRON(MODIFIER||||251|poly|protein_coding|CODING|FBtr0082772|1);INTRON(MODIFIER||||251|poly|protein_coding|CODING|FBtr0303265|1)]	-
X_17322180_SNP	C	T	T	0.1205	20	146	0.03973	0.3526	0.212155	-0.05137	0.2287	0.400683	-0.005823	0.8887	0.83119	0.0911	2.064e-06	2.68089e-06	SiteClass[FBgn0030839|CG5613|SYNONYMOUS_CODING|0;FBgn0040877|CG12994|INTRON|0],TranscriptAnnot[INTRON(MODIFIER||||67|CG12994|protein_coding|CODING|FBtr0074438|1);SYNONYMOUS_CODING(LOW|SILENT|Ttg/Ctg|L443|592|CG5613|protein_coding|CODING|FBtr0074432|);SYNONYMOUS_CODING(LOW|SILENT|Ttg/Ctg|L506|655|CG5613|protein_coding|CODING|FBtr0074431|)]	(TF_binding_site|BDTNP1_TFBS_Mad|FBsf0000289598),(TF_binding_site|mE1_TFBS_chinmo|FBsf0000209068)
3R_8998275_SNP	A	C	C	0.0679	11	151	-0.2287	2.696e-05	2.7025e-06	-0.2071	0.0001472	2.54149e-05	-0.2179	3.782e-05	4.06907e-06	-0.02158	0.4158	0.410661	SiteClass[|||],TranscriptAnnot[INTERGENIC(MODIFIER|||||||||)]	-
2R_13205999_SNP	A	T	A	0.3567	56	101	0.1318	4.863e-06	2.71352e-06	0.1147	7.306e-05	4.63423e-05	0.1233	1.041e-05	5.75188e-06	0.01718	0.2348	0.219015	SiteClass[FBgn0261642|mbl|INTRON|0],TranscriptAnnot[INTRON(MODIFIER||||203|mbl|protein_coding|CODING|FBtr0086991|2);INTRON(MODIFIER||||243|mbl|protein_coding|CODING|FBtr0086994|2);INTRON(MODIFIER||||297|mbl|protein_coding|CODING|FBtr0086992|2);INTRON(MODIFIER||||535|mbl|protein_coding|CODING|FBtr0310058|2);INTRON(MODIFIER||||583|mbl|protein_coding|CODING|FBtr0310059|2);INTRON(MODIFIER||||667|mbl|…	-
3R_8961521_SNP	G	C	G	0.3709	56	95	-0.1426	1.711e-06	2.73394e-06	-0.1199	6.167e-05	0.000107775	-0.1312	5.874e-06	9.4633e-06	-0.02273	0.1176	0.107249	SiteClass[FBgn0038118|timeout|INTRON|0;FBgn0260793|2mit|INTRON|0],TranscriptAnnot[INTRON(MODIFIER||||1141|2mit|protein_coding|CODING|FBtr0301436|2);INTRON(MODIFIER||||1155|2mit|protein_coding|CODING|FBtr0330143|2);INTRON(MODIFIER||||1384|timeout|protein_coding|CODING|FBtr0082712|11)]	-
3R_9032625_SNP	T	C	T	0.3947	60	92	0.1452	6.107e-07	2.74122e-06	0.1197	4.461e-05	9.6305e-05	0.1324	2.899e-06	8.86455e-06	0.02551	0.07661	0.0661087	SiteClass[|||],TranscriptAnnot[INTERGENIC(MODIFIER|||||||||)]	-
3R_6134176_SNP	T	C	C	0.2697	41	111	-0.1438	7.874e-06	9.75202e-06	-0.1514	1.838e-06	3.57291e-06	-0.1476	1.886e-06	2.76425e-06	0.00762	0.6283	0.619816	SiteClass[FBgn0262617|CG43143|UTR_3_PRIME|0;FBgn0037807|CG6293|UTR_3_PRIME|0],TranscriptAnnot[UTR_3_PRIME(MODIFIER||||2537|CG43143|protein_coding|CODING|FBtr0305355|14);UTR_3_PRIME(MODIFIER||||2556|CG43143|protein_coding|CODING|FBtr0337050|15);UTR_3_PRIME(MODIFIER||||573|CG6293|protein_coding|CODING|FBtr0082240|4);UTR_3_PRIME(MODIFIER||||573|CG6293|protein_coding|CODING|FBtr0337051|4)]	-
2R_13205941_SNP	A	T	A	0.3248	51	106	0.1305	6.287e-06	2.80562e-06	0.1106	0.0001647	8.3871e-05	0.1206	1.889e-05	8.26391e-06	0.01996	0.1745	0.162412	SiteClass[FBgn0261642|mbl|INTRON|0],TranscriptAnnot[INTRON(MODIFIER||||203|mbl|protein_coding|CODING|FBtr0086991|2);INTRON(MODIFIER||||243|mbl|protein_coding|CODING|FBtr0086994|2);INTRON(MODIFIER||||297|mbl|protein_coding|CODING|FBtr0086992|2);INTRON(MODIFIER||||535|mbl|protein_coding|CODING|FBtr0310058|2);INTRON(MODIFIER||||583|mbl|protein_coding|CODING|FBtr0310059|2);INTRON(MODIFIER||||667|mbl|…	-
3R_8992972_SNP	A	G	G	0.1887	30	129	-0.1386	9.232e-05	5.0109e-06	-0.1356	0.0001237	7.39521e-06	-0.1371	6.432e-05	2.83275e-06	-0.003018	0.8619	0.859419	SiteClass[|||],TranscriptAnnot[INTERGENIC(MODIFIER|||||||||)]	-
3R_8998282_SNP	A	C	C	0.06832	11	150	-0.2274	2.944e-05	2.91639e-06	-0.2064	0.0001598	2.30519e-05	-0.2169	4.151e-05	4.0025e-06	-0.02095	0.4293	0.424614	SiteClass[|||],TranscriptAnnot[INTERGENIC(MODIFIER|||||||||)]	-
3R_8988129_SNP	A	T	T	0.06135	10	153	-0.2216	0.000124	1.19134e-05	-0.2417	2.63e-05	3.25779e-06	-0.2317	3.549e-05	2.94445e-06	0.02014	0.4549	0.462642	SiteClass[FBgn0038118|timeout|NON_SYNONYMOUS_CODING|0],TranscriptAnnot[NON_SYNONYMOUS_CODING(MODERATE|MISSENSE|Tgc/Agc|C920S|1384|timeout|protein_coding|CODING|FBtr0082712|)]	-
3R_8813333_SNP	C	T	T	0.3442	53	101	-0.1338	6.761e-06	7.93757e-06	-0.1391	2.277e-06	5.01739e-06	-0.1365	1.949e-06	2.95048e-06	0.005322	0.7134	0.708906	SiteClass[FBgn0051342|CG31342|INTRON|0;FBgn0038102|CG14383|SYNONYMOUS_CODING|0],TranscriptAnnot[INTRON(MODIFIER||||823|CG31342|protein_coding|CODING|FBtr0113404|4);INTRON(MODIFIER||||994|CG31342|protein_coding|CODING|FBtr0113403|4);SYNONYMOUS_CODING(LOW|SILENT|ctA/ctG|L296|332|CG14383|protein_coding|CODING|FBtr0082724|)]	(TF_binding_site|mE1_TFBS_cad|FBsf0000248237),(TF_binding_site|mE1_TFBS_chinmo|FBsf0000212615)
3R_8964282_SNP	C	A	A	0.2564	40	116	0.1432	1.041e-05	2.99789e-06	0.1213	0.0001861	0.000164262	0.1323	2.69e-05	1.27256e-05	0.0219	0.1642	0.154102	SiteClass[FBgn0038118|timeout|INTRON|0;FBgn0260793|2mit|INTRON|0],TranscriptAnnot[INTRON(MODIFIER||||1141|2mit|protein_coding|CODING|FBtr0301436|2);INTRON(MODIFIER||||1155|2mit|protein_coding|CODING|FBtr0330143|2);INTRON(MODIFIER||||1384|timeout|protein_coding|CODING|FBtr0082712|11)]	-
3R_8887717_SNP	T	A	A	0.2336	32	105	-0.1713	1.49e-06	3.00131e-06	-0.1527	1.453e-05	2.15223e-05	-0.162	2.485e-06	3.90727e-06	-0.01861	0.2668	0.272153	SiteClass[FBgn0004666|sim|INTRON|0],TranscriptAnnot[INTRON(MODIFIER||||664|sim|protein_coding|CODING|FBtr0082711|1);INTRON(MODIFIER||||672|sim|protein_coding|CODING|FBtr0334614|1);UPSTREAM(MODIFIER||||675|sim|protein_coding|CODING|FBtr0334613|)]	-
2L_13404102_SNP	G	T	T	0.1364	21	133	-0.1862	3.841e-06	3.06707e-06	-0.1662	3.353e-05	6.13761e-05	-0.1762	6.314e-06	7.19445e-06	-0.02006	0.2964	0.308921	SiteClass[FBgn0032521|CG7110|INTRON|0],TranscriptAnnot[INTRON(MODIFIER||||825|CG7110|protein_coding|CODING|FBtr0080500|5)]	-
2R_13205936_SNP	G	C	G	0.3333	51	102	0.1291	1.085e-05	3.07489e-06	0.1058	0.0003718	0.000204615	0.1175	4.018e-05	1.4705e-05	0.02324	0.115	0.105635	SiteClass[FBgn0261642|mbl|INTRON|0],TranscriptAnnot[INTRON(MODIFIER||||203|mbl|protein_coding|CODING|FBtr0086991|2);INTRON(MODIFIER||||243|mbl|protein_coding|CODING|FBtr0086994|2);INTRON(MODIFIER||||297|mbl|protein_coding|CODING|FBtr0086992|2);INTRON(MODIFIER||||535|mbl|protein_coding|CODING|FBtr0310058|2);INTRON(MODIFIER||||583|mbl|protein_coding|CODING|FBtr0310059|2);INTRON(MODIFIER||||667|mbl|…	-
3R_9016465_SNP	C	G	G	0.4258	66	89	-0.1309	4.14e-06	3.08842e-06	-0.111	9.571e-05	0.000176337	-0.121	1.124e-05	1.34713e-05	-0.01991	0.1612	0.143586	SiteClass[FBgn0038125|CG8141|UPSTREAM|958],TranscriptAnnot[INTERGENIC(MODIFIER|||||||||);UPSTREAM(MODIFIER||||239|CG8141|protein_coding|CODING|FBtr0082734|)]	(TF_binding_site|BDTNP1_TFBS_twi|FBsf0000264854)
3R_9031455_INS	CTACGG	C	C	0.1793	26	119	-0.1881	9.693e-07	3.08906e-06	-0.1613	2.961e-05	0.000165604	-0.1747	2.978e-06	1.29736e-05	-0.02683	0.1461	0.13915	SiteClass[|||],TranscriptAnnot[INTERGENIC(MODIFIER|||||||||)]	-
3R_9048516_SNP	T	G	T	0.4898	72	75	-0.136	2.155e-06	3.10613e-06	-0.128	7.983e-06	1.87834e-05	-0.132	1.981e-06	3.6837e-06	-0.007994	0.5799	0.564231	SiteClass[FBgn0000024|Ace|DOWNSTREAM|157],TranscriptAnnot[DOWNSTREAM(MODIFIER||||636|Ace|protein_coding|CODING|FBtr0335223|);INTERGENIC(MODIFIER|||||||||)]	-
3R_9012638_SNP	T	C	C	0.1783	28	129	-0.1428	0.0001143	3.57677e-06	-0.1326	0.0002971	1.21525e-05	-0.1377	0.0001154	3.11012e-06	-0.01022	0.5709	0.559769	SiteClass[FBgn0038123|CG8508|UPSTREAM|406],TranscriptAnnot[INTERGENIC(MODIFIER|||||||||);UPSTREAM(MODIFIER||||267|CG8508|protein_coding|CODING|FBtr0082783|)]	-
3R_8887730_SNP	T	A	A	0.2245	33	114	-0.1665	1.144e-06	3.19858e-06	-0.1517	9.281e-06	2.86332e-05	-0.1591	1.506e-06	4.74317e-06	-0.01487	0.397	0.370483	SiteClass[FBgn0004666|sim|INTRON|0],TranscriptAnnot[INTRON(MODIFIER||||664|sim|protein_coding|CODING|FBtr0082711|1);INTRON(MODIFIER||||672|sim|protein_coding|CODING|FBtr0334614|1);UPSTREAM(MODIFIER||||675|sim|protein_coding|CODING|FBtr0334613|)]	-
3R_9101511_DEL	T	TT	TT	0.449	66	81	-0.1505	9.327e-08	6.94584e-06	-0.1495	7.491e-08	6.75318e-06	-0.15	3.179e-08	3.21401e-06	-0.0009974	0.9426	0.942964	SiteClass[|||],TranscriptAnnot[INTERGENIC(MODIFIER|||||||||)]	-
3R_9188796_SNP	G	A	G	0.4351	67	87	-0.1437	5.487e-07	3.26793e-06	-0.1273	7.714e-06	0.000105352	-0.1355	1.082e-06	1.01857e-05	-0.01642	0.2174	0.228603	SiteClass[FBgn0086371|poly|INTRON|0],TranscriptAnnot[INTRON(MODIFIER||||251|poly|protein_coding|CODING|FBtr0082772|1);INTRON(MODIFIER||||251|poly|protein_coding|CODING|FBtr0303265|1)]	-
3R_9016463_SNP	T	C	C	0.4248	65	88	-0.1316	4.686e-06	3.31169e-06	-0.1162	4.961e-05	9.09973e-05	-0.1239	8.472e-06	9.40512e-06	-0.01536	0.2724	0.263069	SiteClass[FBgn0038125|CG8141|UPSTREAM|960],TranscriptAnnot[INTERGENIC(MODIFIER|||||||||);UPSTREAM(MODIFIER||||239|CG8141|protein_coding|CODING|FBtr0082734|)]	(TF_binding_site|BDTNP1_TFBS_twi|FBsf0000264854)
3R_6407950_DEL	T	TT	TT	0.08696	12	126	-0.2236	1.99e-05	3.32665e-06	-0.1523	0.003896	0.00123273	-0.188	0.0002332	4.69219e-05	-0.07133	0.004471	0.00448097	SiteClass[FBgn0001235|hth|DOWNSTREAM|249],TranscriptAnnot[DOWNSTREAM(MODIFIER||||266|hth|protein_coding|CODING|FBtr0100454|);INTRON(MODIFIER||||458|hth|protein_coding|CODING|FBtr0301956|5);INTRON(MODIFIER||||472|hth|protein_coding|CODING|FBtr0082256|6);INTRON(MODIFIER||||487|hth|protein_coding|CODING|FBtr0082255|6)]	-
3R_8959103_SNP	A	T	T	0.2148	32	117	0.1597	5.665e-06	3.33507e-06	0.1435	4.096e-05	5.19088e-05	0.1516	8.991e-06	6.80767e-06	0.01614	0.3176	0.335284	SiteClass[FBgn0038118|timeout|INTRON|0;FBgn0260793|2mit|INTRON|0],TranscriptAnnot[INTRON(MODIFIER||||1141|2mit|protein_coding|CODING|FBtr0301436|2);INTRON(MODIFIER||||1155|2mit|protein_coding|CODING|FBtr0330143|2);INTRON(MODIFIER||||1384|timeout|protein_coding|CODING|FBtr0082712|11)]	-
3R_9069608_SNP	A	G	G	0.1635	26	133	-0.1696	5.852e-06	3.37604e-06	-0.1611	1.71e-05	2.4638e-05	-0.1653	5.307e-06	4.47821e-06	-0.00859	0.6369	0.633597	SiteClass[FBgn0000024|Ace|SYNONYMOUS_CODING|0],TranscriptAnnot[SYNONYMOUS_CODING(LOW|SILENT|ttC/ttT|F236|636|Ace|protein_coding|CODING|FBtr0335223|);SYNONYMOUS_CODING(LOW|SILENT|ttC/ttT|F236|649|Ace|protein_coding|CODING|FBtr0082780|);SYNONYMOUS_CODING(LOW|SILENT|ttC/ttT|F236|649|Ace|protein_coding|CODING|FBtr0300486|)]	-
3R_9020475_SNP	G	T	T	0.1975	31	126	-0.1673	1.225e-06	3.39437e-06	-0.1427	3.434e-05	0.000111362	-0.155	3.457e-06	1.0722e-05	-0.02461	0.149	0.142973	SiteClass[|||],TranscriptAnnot[INTERGENIC(MODIFIER|||||||||)]	-
3R_8998808_SNP	C	T	T	0.1069	17	142	-0.1844	3.561e-05	8.94525e-06	-0.1912	1.671e-05	5.8695e-06	-0.1878	1.377e-05	3.42127e-06	0.006834	0.75	0.751428	SiteClass[|||],TranscriptAnnot[INTERGENIC(MODIFIER|||||||||)]	-
3R_9027856_SNP	T	G	T	0.2452	38	117	0.1481	5.953e-06	3.44264e-06	0.1143	0.0004703	0.00127687	0.1312	3.506e-05	4.87496e-05	0.03384	0.03387	0.0299566	SiteClass[|||],TranscriptAnnot[INTERGENIC(MODIFIER|||||||||)]	-
3R_13795864_SNP	C	A	A	0.1544	23	126	-0.1835	5.135e-06	3.47716e-06	-0.1641	4.334e-05	8.56356e-05	-0.1738	8.334e-06	9.2965e-06	-0.0194	0.3174	0.307962	SiteClass[FBgn0263995|cpo|INTRON|0],TranscriptAnnot[INTRON(MODIFIER||||606|cpo|protein_coding|CODING|FBtr0330269|3);INTRON(MODIFIER||||606|cpo|protein_coding|CODING|FBtr0330276|3);INTRON(MODIFIER||||606|cpo|protein_coding|CODING|FBtr0330278|3);INTRON(MODIFIER||||606|cpo|protein_coding|CODING|FBtr0330279|3);INTRON(MODIFIER||||606|cpo|protein_coding|CODING|FBtr0330280|3);INTRON(MODIFIER||||607|cpo|…	-
3R_8860921_SNP	T	C	T	0.2179	34	122	0.1561	5.716e-06	3.47967e-06	0.149	1.161e-05	1.81276e-05	0.1525	4.471e-06	3.8286e-06	0.007134	0.6551	0.661586	SiteClass[FBgn0003308|ry|NON_SYNONYMOUS_CODING|0],TranscriptAnnot[NON_SYNONYMOUS_CODING(MODERATE|MISSENSE|Tcg/Ccg|S542P|1335|ry|protein_coding|CODING|FBtr0082704|)]	(TF_binding_site|BDTNP1_TFBS_dl|FBsf0000311388),(TF_binding_site|BDTNP1_TFBS_twi|FBsf0000264844),(TF_binding_site|mE1_TFBS_cad|FBsf0000248245),(TF_binding_site|mE1_TFBS_chinmo|FBsf0000212619),(TF_binding_site|mE1_TFBS_HSA|FBsf0000371117)
3R_9020348_SNP	T	G	G	0.08667	13	137	-0.2085	2.002e-05	1.32612e-05	-0.2214	7.171e-06	4.01699e-06	-0.215	6.057e-06	3.48345e-06	0.01291	0.6033	0.596546	SiteClass[|||],TranscriptAnnot[INTERGENIC(MODIFIER|||||||||)]	-
3R_12571819_SNP	T	C	C	0.103	17	148	-0.1784	6.055e-05	0.000188963	-0.2093	1.674e-06	3.50098e-06	-0.1939	6.096e-06	1.51438e-05	0.03085	0.1366	0.150574	SiteClass[FBgn0020556|bxd|EXON|0],TranscriptAnnot[EXON(MODIFIER|||||bxd|ncRNA|NON_CODING|FBtr0083344|1);INTRON(MODIFIER|||||bxd|ncRNA|NON_CODING|FBtr0083341|2);INTRON(MODIFIER|||||bxd|ncRNA|NON_CODING|FBtr0083342|2);INTRON(MODIFIER|||||bxd|ncRNA|NON_CODING|FBtr0083343|1)]	(regulatory_region|REDfly_CRMs|FBsf0000435191),(TF_binding_site|BDTNP1_TFBS_dl|FBsf0000312219),(TF_binding_site|BDTNP1_TFBS_hb|FBsf0000292559),(TF_binding_site|BDTNP1_TFBS_Med|FBsf0000285626),(TF_binding_site|BDTNP1_TFBS_prd|FBsf0000276619),(TF_binding_site|BDTNP1_TFBS_twi|FBsf0000265221),(TF_binding_site|mE1_TFBS_cad|FBsf0000248557),(TF_binding_site|mE1_TFBS_HSA|FBsf0000372352),(TF_binding_site|…
3R_8964383_INS	TATCTTATTATTAT	T	T	0.2739	43	114	0.1402	9.137e-06	3.60284e-06	0.1166	0.0002301	0.00024098	0.1284	2.857e-05	1.75119e-05	0.02366	0.1227	0.114497	SiteClass[FBgn0038118|timeout|INTRON|0;FBgn0260793|2mit|INTRON|0],TranscriptAnnot[INTRON(MODIFIER||||1141|2mit|protein_coding|CODING|FBtr0301436|2);INTRON(MODIFIER||||1155|2mit|protein_coding|CODING|FBtr0330143|2);INTRON(MODIFIER||||1384|timeout|protein_coding|CODING|FBtr0082712|11)]	-
3R_17363617_SNP	A	C	C	0.07407	12	150	0.03192	0.558	0.225828	-0.08129	0.1319	0.285035	-0.02469	0.6398	0.938497	0.1132	6.157e-06	3.62479e-06	SiteClass[|||],TranscriptAnnot[INTERGENIC(MODIFIER|||||||||)]	(TF_binding_site|BDTNP1_TFBS_prd|FBsf0000276734),(TF_binding_site|mE1_TFBS_cad|FBsf0000248942),(TF_binding_site|mE1_TFBS_HSA|FBsf0000373824)
X_4498496_SNP	A	G	A	0.3782	59	97	0.1233	2.036e-05	3.73934e-06	0.09014	0.002009	0.000637747	0.1067	0.0001531	3.24864e-05	0.0332	0.01878	0.0158465	SiteClass[FBgn0052773|CG32773|INTRON|0],TranscriptAnnot[INTRON(MODIFIER||||117|CG32773|protein_coding|CODING|FBtr0070703|1)]	-
3R_9071355_SNP	C	A	A	0.4933	74	76	-0.1455	2.305e-07	3.78677e-06	-0.1403	5.36e-07	1.82002e-05	-0.1429	1.4e-07	4.00844e-06	-0.005109	0.7193	0.709764	SiteClass[FBgn0000024|Ace|INTRON|0],TranscriptAnnot[INTRON(MODIFIER||||636|Ace|protein_coding|CODING|FBtr0335223|2);INTRON(MODIFIER||||649|Ace|protein_coding|CODING|FBtr0082780|2);INTRON(MODIFIER||||649|Ace|protein_coding|CODING|FBtr0300486|3)]	-
2R_13205979_SNP	C	A	C	0.471	73	82	-0.1071	0.0001571	0.000106005	-0.1216	1.42e-05	3.92318e-06	-0.1143	2.801e-05	1.13217e-05	0.01447	0.2999	0.284031	SiteClass[FBgn0261642|mbl|INTRON|0],TranscriptAnnot[INTRON(MODIFIER||||203|mbl|protein_coding|CODING|FBtr0086991|2);INTRON(MODIFIER||||243|mbl|protein_coding|CODING|FBtr0086994|2);INTRON(MODIFIER||||297|mbl|protein_coding|CODING|FBtr0086992|2);INTRON(MODIFIER||||535|mbl|protein_coding|CODING|FBtr0310058|2);INTRON(MODIFIER||||583|mbl|protein_coding|CODING|FBtr0310059|2);INTRON(MODIFIER||||667|mbl|…	-
3R_9032793_SNP	G	T	G	0.396	59	90	0.1434	9.22e-07	3.96663e-06	0.1184	6.17e-05	9.28176e-05	0.1309	4.282e-06	1.03988e-05	0.02507	0.08449	0.0736288	SiteClass[|||],TranscriptAnnot[INTERGENIC(MODIFIER|||||||||)]	-
3R_9036168_SNP	A	G	A	0.3613	56	99	0.1364	2.855e-06	4.04529e-06	0.1166	6.744e-05	6.56865e-05	0.1265	7.811e-06	8.58812e-06	0.01974	0.1705	0.159102	SiteClass[FBgn0038126|CG8483|INTRON|0],TranscriptAnnot[INTRON(MODIFIER||||392|CG8483|protein_coding|CODING|FBtr0082782|2)]	-
3R_8986387_SNP	G	T	T	0.1879	28	121	-0.1657	2.004e-06	1.20021e-05	-0.1703	1.259e-06	5.98505e-06	-0.168	7.556e-07	4.05898e-06	0.004582	0.7864	0.794916	SiteClass[FBgn0038118|timeout|INTRON|0],TranscriptAnnot[INTRON(MODIFIER||||1384|timeout|protein_coding|CODING|FBtr0082712|14)]	-
3R_9004718_SNP	A	C	C	0.06135	10	153	-0.2325	4.377e-05	5.2379e-06	-0.225	8.184e-05	1.39331e-05	-0.2288	3.572e-05	4.09427e-06	-0.007494	0.7842	0.78474	SiteClass[|||],TranscriptAnnot[INTERGENIC(MODIFIER|||||||||)]	-
X_7991232_SNP	A	C	C	0.1775	30	139	0.116	0.00109	4.25274e-05	0.1336	0.0001498	4.12706e-06	0.1248	0.0002784	6.81923e-06	-0.0176	0.3011	0.297501	SiteClass[FBgn0029997|CG2258|SYNONYMOUS_CODING|0],TranscriptAnnot[SYNONYMOUS_CODING(LOW|SILENT|gtG/gtT|V668|801|CG2258|protein_coding|CODING|FBtr0071109|);SYNONYMOUS_CODING(LOW|SILENT|gtG/gtT|V668|801|CG2258|protein_coding|CODING|FBtr0071110|);SYNONYMOUS_CODING(LOW|SILENT|gtG/gtT|V668|801|CG2258|protein_coding|CODING|FBtr0071111|)]	(TF_binding_site|mE1_TFBS_HSA|FBsf0000380469),(TF_binding_site|mE1_TFBS_sens|FBsf0000220114)
X_7991235_SNP	C	T	T	0.1775	30	139	0.116	0.00109	4.25274e-05	0.1336	0.0001498	4.12706e-06	0.1248	0.0002784	6.81923e-06	-0.0176	0.3011	0.297501	SiteClass[FBgn0029997|CG2258|SYNONYMOUS_CODING|0],TranscriptAnnot[SYNONYMOUS_CODING(LOW|SILENT|aaA/aaG|K667|801|CG2258|protein_coding|CODING|FBtr0071109|);SYNONYMOUS_CODING(LOW|SILENT|aaA/aaG|K667|801|CG2258|protein_coding|CODING|FBtr0071110|);SYNONYMOUS_CODING(LOW|SILENT|aaA/aaG|K667|801|CG2258|protein_coding|CODING|FBtr0071111|)]	(TF_binding_site|mE1_TFBS_HSA|FBsf0000380469),(TF_binding_site|mE1_TFBS_sens|FBsf0000220114)
2L_5329719_SNP	T	C	T	0.08537	14	150	0.09535	0.05397	0.0710506	-0.0095	0.8485	0.70734	0.04292	0.374	0.460135	0.1048	4.094e-06	4.15682e-06	SiteClass[FBgn0031701|TotM|UPSTREAM|138;FBgn0031702|fusl|DOWNSTREAM|751;FBgn0031700|CG14022|UPSTREAM|840],TranscriptAnnot[DOWNSTREAM(MODIFIER||||453|fusl|protein_coding|CODING|FBtr0079078|);DOWNSTREAM(MODIFIER||||453|fusl|protein_coding|CODING|FBtr0079079|);DOWNSTREAM(MODIFIER||||453|fusl|protein_coding|CODING|FBtr0307037|);DOWNSTREAM(MODIFIER||||453|fusl|protein_coding|CODING|FBtr0307038|);DOWNS…	-
3R_8994649_SNP	C	T	T	0.2697	41	111	-0.1234	0.000127	8.54401e-06	-0.1232	0.0001067	8.87764e-06	-0.1233	6.842e-05	4.15915e-06	-0.0001744	0.9914	0.990938	SiteClass[|||],TranscriptAnnot[INTERGENIC(MODIFIER|||||||||)]	-
3R_8942005_SNP	C	G	C	0.3419	53	102	-0.1397	1.568e-06	4.15965e-06	-0.1326	4.706e-06	4.17201e-05	-0.1362	1.242e-06	6.71198e-06	-0.007096	0.6297	0.618007	SiteClass[FBgn0038118|timeout|INTRON|0],TranscriptAnnot[INTRON(MODIFIER||||1384|timeout|protein_coding|CODING|FBtr0082712|11)]	-
3R_8852473_SNP	T	C	C	0.18	27	123	-0.1277	0.000729	0.000380686	-0.1631	1.186e-05	4.16472e-06	-0.1454	6.429e-05	2.52214e-05	0.03539	0.05352	0.0463196	SiteClass[FBgn0038111|CG12360|DOWNSTREAM|340;FBgn0020496|CtBP|DOWNSTREAM|476],TranscriptAnnot[DOWNSTREAM(MODIFIER||||379|CtBP|protein_coding|CODING|FBtr0334516|);DOWNSTREAM(MODIFIER||||473|CtBP|protein_coding|CODING|FBtr0334514|);DOWNSTREAM(MODIFIER||||476|CtBP|protein_coding|CODING|FBtr0100161|);DOWNSTREAM(MODIFIER||||476|CtBP|protein_coding|CODING|FBtr0334517|);DOWNSTREAM(MODIFIER||||481|CtBP|p…	-
3R_9032262_SNP	A	G	A	0.2323	36	119	0.149	7.722e-06	4.19537e-06	0.11	0.001052	0.00178105	0.1295	6.445e-05	6.61684e-05	0.03903	0.01813	0.0138006	SiteClass[|||],TranscriptAnnot[INTERGENIC(MODIFIER|||||||||)]	-
3R_9033221_SNP	T	C	C	0.128	21	143	-0.1966	1.384e-06	4.20672e-06	-0.1553	0.0001501	0.000408467	-0.1759	9.237e-06	2.60112e-05	-0.04125	0.0335	0.0345494	SiteClass[|||],TranscriptAnnot[INTERGENIC(MODIFIER|||||||||)]	-
3R_9017449_SNP	C	T	T	0.2215	35	123	-0.1593	1.708e-06	4.28736e-06	-0.1374	3.782e-05	9.94001e-05	-0.1483	4.37e-06	1.1247e-05	-0.02185	0.1814	0.173675	SiteClass[FBgn0038125|CG8141|SYNONYMOUS_CODING|0],TranscriptAnnot[SYNONYMOUS_CODING(LOW|SILENT|gaT/gaC|D9|239|CG8141|protein_coding|CODING|FBtr0082734|)]	(TF_binding_site|BDTNP1_TFBS_twi|FBsf0000264854)
3R_9076698_SNP	G	A	A	0.1562	25	135	-0.1799	2.377e-06	1.10979e-05	-0.1758	4.38e-06	7.46722e-06	-0.1779	1.615e-06	4.3699e-06	-0.004136	0.822	0.821252	SiteClass[FBgn0000024|Ace|INTRON|0],TranscriptAnnot[INTRON(MODIFIER||||636|Ace|protein_coding|CODING|FBtr0335223|1);INTRON(MODIFIER||||649|Ace|protein_coding|CODING|FBtr0082780|1);INTRON(MODIFIER||||649|Ace|protein_coding|CODING|FBtr0300486|2)]	-
3R_8218458_SNP	T	A	A	0.1887	30	129	-0.1656	2.322e-06	4.46166e-06	-0.1501	2.134e-05	0.000138963	-0.1579	3.705e-06	1.39662e-05	-0.01546	0.3703	0.363715	SiteClass[FBgn0038033|CG10097|UTR_3_PRIME|0;FBgn0085431|CG34402|INTRON|0;FBgn0038032|CG10096|INTRON|0],TranscriptAnnot[INTRON(MODIFIER||||486|CG34402|protein_coding|CODING|FBtr0112656|2);INTRON(MODIFIER||||502|CG10096|protein_coding|CODING|FBtr0082604|1);INTRON(MODIFIER||||695|CG34402|protein_coding|CODING|FBtr0112654|4);UTR_3_PRIME(MODIFIER||||449|CG10097|protein_coding|CODING|FBtr0100524|4);UTR…	(TF_binding_site|mE1_TFBS_cad|FBsf0000248198),(TF_binding_site|mE1_TFBS_HSA|FBsf0000370939)
3R_15104052_SNP	C	T	T	0.05488	9	155	-0.01865	0.7636	0.906886	-0.1468	0.0165	0.0337555	-0.08271	0.1677	0.25086	0.1281	6.142e-06	4.56163e-06	SiteClass[FBgn0265062|CG44173|DOWNSTREAM|445],TranscriptAnnot[DOWNSTREAM(MODIFIER||||77|CG44173|protein_coding|CODING|FBtr0336794|);INTERGENIC(MODIFIER|||||||||)]	-
3R_10220008_SNP	A	T	A	0.4145	63	89	-0.1364	2.734e-06	8.646e-06	-0.1273	1.12e-05	1.04911e-05	-0.1319	2.768e-06	4.57788e-06	-0.009105	0.5261	0.510426	SiteClass[FBgn0086901|cv-c|SYNONYMOUS_CODING|0],TranscriptAnnot[SYNONYMOUS_CODING(LOW|SILENT|cgT/cgA|R1942|2351|cv-c|protein_coding|CODING|FBtr0112630|);SYNONYMOUS_CODING(LOW|SILENT|cgT/cgA|R1942|2351|cv-c|protein_coding|CODING|FBtr0112632|);SYNONYMOUS_CODING(LOW|SILENT|cgT/cgA|R608|1017|cv-c|protein_coding|CODING|FBtr0112631|)]	(TF_binding_site|mE1_TFBS_cad|FBsf0000248344)
3R_7312014_SNP	G	C	C	0.06173	10	152	-0.2362	3.887e-05	4.62303e-06	-0.2302	5.901e-05	2.07915e-05	-0.2332	2.761e-05	4.7863e-06	-0.005974	0.831	0.82767	SiteClass[|||],TranscriptAnnot[INTERGENIC(MODIFIER|||||||||)]	-
3R_9077699_SNP	T	A	A	0.1411	23	140	-0.1793	5.696e-06	4.75978e-06	-0.1535	0.0001035	0.000109576	-0.1664	1.434e-05	1.25365e-05	-0.02583	0.1767	0.17088	SiteClass[FBgn0000024|Ace|INTRON|0],TranscriptAnnot[INTRON(MODIFIER||||636|Ace|protein_coding|CODING|FBtr0335223|1);INTRON(MODIFIER||||649|Ace|protein_coding|CODING|FBtr0082780|1);INTRON(MODIFIER||||649|Ace|protein_coding|CODING|FBtr0300486|2)]	-
3R_9017173_SNP	G	T	G	0.3961	61	93	0.1334	4.696e-06	4.82523e-06	0.1123	0.0001202	0.000198763	0.1228	1.415e-05	1.79448e-05	0.02105	0.1374	0.127297	SiteClass[FBgn0038125|CG8141|UPSTREAM|250],TranscriptAnnot[INTERGENIC(MODIFIER|||||||||);UPSTREAM(MODIFIER||||239|CG8141|protein_coding|CODING|FBtr0082734|)]	(TF_binding_site|BDTNP1_TFBS_twi|FBsf0000264854)
3R_8937238_SNP	T	A	A	0.2403	37	117	0.1647	5.866e-07	4.84983e-06	0.1353	4.203e-05	0.000450613	0.15	2.675e-06	2.95428e-05	0.0294	0.07461	0.0623289	SiteClass[FBgn0038118|timeout|INTRON|0],TranscriptAnnot[INTRON(MODIFIER||||1384|timeout|protein_coding|CODING|FBtr0082712|10)]	-
3R_9018839_SNP	T	C	T	0.2468	39	119	0.1504	3.705e-06	4.86903e-06	0.1268	9.264e-05	0.000417353	0.1386	1.08e-05	2.82353e-05	0.0236	0.1348	0.126761	SiteClass[FBgn0038125|CG8141|DOWNSTREAM|608],TranscriptAnnot[DOWNSTREAM(MODIFIER||||239|CG8141|protein_coding|CODING|FBtr0082734|);INTERGENIC(MODIFIER|||||||||)]	-
3R_14119038_SNP	T	C	C	0.1437	23	137	-0.1582	6.54e-05	0.000184332	-0.1863	1.931e-06	4.897e-06	-0.1722	6.441e-06	1.75198e-05	0.02817	0.1439	0.13576	SiteClass[FBgn0010877|l(3)05822|INTRON|0],TranscriptAnnot[INTRON(MODIFIER||||600|l_3_05822|protein_coding|CODING|FBtr0083595|1);INTRON(MODIFIER||||600|l_3_05822|protein_coding|CODING|FBtr0334314|1);UPSTREAM(MODIFIER||||600|l_3_05822|protein_coding|CODING|FBtr0334313|)]	-
X_14398796_SNP	C	T	T	0.1062	17	143	-0.1917	2.299e-05	4.92352e-06	-0.1417	0.001902	0.000655656	-0.1667	0.0001587	3.75409e-05	-0.05003	0.02155	0.0193668	SiteClass[|||],TranscriptAnnot[INTERGENIC(MODIFIER|||||||||)]	(TF_binding_site|BDTNP1_TFBS_dl|FBsf0000319054),(TF_binding_site|mE1_TFBS_HSA|FBsf0000347869),(TF_binding_site|mE1_TFBS_HSA|FBsf0000347870)
3R_9102354_SNP	C	T	T	0.1635	26	133	-0.1748	1.431e-06	1.67854e-05	-0.1802	6.942e-07	6.09887e-06	-0.1775	4.226e-07	4.93098e-06	0.005455	0.7676	0.76214	SiteClass[|||],TranscriptAnnot[INTERGENIC(MODIFIER|||||||||)]	(TF_binding_site|BDTNP1_TFBS_prd|FBsf0000276479),(TF_binding_site|mE1_TFBS_HSA|FBsf0000371167)
X_10575744_SNP	G	A	G	0.2593	42	120	0.132	2.905e-05	1.00189e-05	0.1303	3.096e-05	1.09154e-05	0.1312	1.801e-05	5.06101e-06	0.001683	0.9072	0.911088	SiteClass[FBgn0052677|X11Lbeta|INTRON|0],TranscriptAnnot[INTRON(MODIFIER||||2063|X11Lbeta|protein_coding|CODING|FBtr0310298|3);INTRON(MODIFIER||||2139|X11Lbeta|protein_coding|CODING|FBtr0071493|3)]	-
2L_6335422_SNP	A	G	G	0.06748	11	152	-0.2278	2.522e-05	2.40981e-05	-0.2385	1.028e-05	5.07335e-06	-0.2331	8.628e-06	5.48488e-06	0.0107	0.6875	0.683352	SiteClass[FBgn0031799|Pez|SYNONYMOUS_CODING|0],TranscriptAnnot[SYNONYMOUS_CODING(LOW|SILENT|ttC/ttT|F645|1252|Pez|protein_coding|CODING|FBtr0079284|);SYNONYMOUS_CODING(LOW|SILENT|ttC/ttT|F645|1252|Pez|protein_coding|CODING|FBtr0331226|)]	(TF_binding_site|mE1_TFBS_cad|FBsf0000241510),(TF_binding_site|mE1_TFBS_chinmo|FBsf0000207348)
3R_8999404_SNP	A	T	T	0.4932	73	75	-0.1249	1.408e-05	5.07909e-06	-0.1206	2.699e-05	2.23167e-05	-0.1227	1.052e-05	5.22705e-06	-0.004278	0.7627	0.756875	SiteClass[|||],TranscriptAnnot[INTERGENIC(MODIFIER|||||||||)]	-
3R_8947711_SNP	T	G	T	0.4667	63	72	-0.1442	1.961e-06	5.11334e-06	-0.1193	6.558e-05	0.000440616	-0.1317	6.78e-06	2.98725e-05	-0.02484	0.07595	0.0853995	SiteClass[FBgn0038118|timeout|INTRON|0;FBgn0260793|2mit|UTR_3_PRIME|0],TranscriptAnnot[INTRON(MODIFIER||||1384|timeout|protein_coding|CODING|FBtr0082712|11);UTR_3_PRIME(MODIFIER||||1141|2mit|protein_coding|CODING|FBtr0301436|4);UTR_3_PRIME(MODIFIER||||1155|2mit|protein_coding|CODING|FBtr0330143|4)]	-
3R_9119182_SNP	G	A	A	0.1806	28	127	-0.1501	3.132e-05	0.000284291	-0.1782	3.996e-07	5.12047e-06	-0.1641	2.074e-06	2.32443e-05	0.02805	0.0973	0.108713	SiteClass[FBgn0038134|wntD|UPSTREAM|262],TranscriptAnnot[INTERGENIC(MODIFIER|||||||||);UPSTREAM(MODIFIER||||309|wntD|protein_coding|CODING|FBtr0082775|)]	(regulatory_region|REDfly_CRMs|FBsf0000435093),(regulatory_region|REDfly_CRMs|FBsf0000435493),(TF_binding_site|BDTNP1_TFBS_bcd|FBsf0000334224),(TF_binding_site|BDTNP1_TFBS_da|FBsf0000329061),(TF_binding_site|BDTNP1_TFBS_dl|FBsf0000311419),(TF_binding_site|BDTNP1_TFBS_gt|FBsf0000294393),(TF_binding_site|BDTNP1_TFBS_hb|FBsf0000292448),(TF_binding_site|BDTNP1_TFBS_kni|FBsf0000289880),(TF_binding_sit…
3R_8978787_SNP	T	C	C	0.2372	37	119	0.1447	1.188e-05	5.20364e-06	0.1234	0.0001709	0.000140339	0.1341	2.633e-05	1.51451e-05	0.02131	0.1947	0.176841	SiteClass[FBgn0038118|timeout|INTRON|0;FBgn0260793|2mit|INTRON|0],TranscriptAnnot[INTRON(MODIFIER||||1141|2mit|protein_coding|CODING|FBtr0301436|2);INTRON(MODIFIER||||1155|2mit|protein_coding|CODING|FBtr0330143|2);INTRON(MODIFIER||||1384|timeout|protein_coding|CODING|FBtr0082712|11)]	-
3R_9004210_SNP	C	T	T	0.1375	22	138	-0.17	1.828e-05	5.35487e-06	-0.154	0.0001127	3.4944e-05	-0.162	2.644e-05	6.9034e-06	-0.01599	0.4143	0.407	SiteClass[|||],TranscriptAnnot[INTERGENIC(MODIFIER|||||||||)]	-
3R_11770432_SNP	A	G	G	0.07879	13	152	-0.2208	1.189e-05	5.38103e-06	-0.2134	2.427e-05	2.7216e-05	-0.2171	9.308e-06	6.01551e-06	-0.007437	0.7611	0.759458	SiteClass[FBgn0013334|Sap47|INTRON|0],TranscriptAnnot[INTRON(MODIFIER||||344|Sap47|protein_coding|CODING|FBtr0310672|2);INTRON(MODIFIER||||347|Sap47|protein_coding|CODING|FBtr0301655|1);INTRON(MODIFIER||||351|Sap47|protein_coding|CODING|FBtr0083209|1);INTRON(MODIFIER||||374|Sap47|protein_coding|CODING|FBtr0083205|1);INTRON(MODIFIER||||535|Sap47|protein_coding|CODING|FBtr0083210|2);INTRON(MODIFIER…	-
3R_9068782_SNP	G	C	C	0.1731	27	129	-0.18	8.952e-07	5.39826e-06	-0.1701	3.124e-06	5.28728e-05	-0.1751	7.682e-07	8.76417e-06	-0.009816	0.5888	0.580988	SiteClass[FBgn0000024|Ace|INTRON|0],TranscriptAnnot[INTRON(MODIFIER||||636|Ace|protein_coding|CODING|FBtr0335223|5);INTRON(MODIFIER||||649|Ace|protein_coding|CODING|FBtr0082780|5);INTRON(MODIFIER||||649|Ace|protein_coding|CODING|FBtr0300486|6)]	-
3R_6393729_SNP	C	G	G	0.08537	14	150	-0.1941	7.537e-05	5.54658e-06	-0.1314	0.007757	0.0015052	-0.1627	0.0006776	6.71948e-05	-0.06276	0.005264	0.00692549	SiteClass[FBgn0001235|hth|INTRON|0],TranscriptAnnot[INTRON(MODIFIER||||458|hth|protein_coding|CODING|FBtr0301956|5);INTRON(MODIFIER||||472|hth|protein_coding|CODING|FBtr0082256|6);INTRON(MODIFIER||||487|hth|protein_coding|CODING|FBtr0082255|6)]	(TF_binding_site|mE1_TFBS_cnc|FBsf0000206621)
3R_8887727_SNP	G	T	T	0.2349	35	114	-0.1598	1.698e-06	6.34229e-06	-0.1498	7.143e-06	2.06081e-05	-0.1548	1.617e-06	5.61315e-06	-0.01006	0.5537	0.53541	SiteClass[FBgn0004666|sim|INTRON|0],TranscriptAnnot[INTRON(MODIFIER||||664|sim|protein_coding|CODING|FBtr0082711|1);INTRON(MODIFIER||||672|sim|protein_coding|CODING|FBtr0334614|1);UPSTREAM(MODIFIER||||675|sim|protein_coding|CODING|FBtr0334613|)]	-
3L_12137861_SNP	A	C	C	0.1446	24	142	-0.004428	0.9109	0.882429	-0.08614	0.0278	0.0397542	-0.04528	0.237	0.32884	0.08171	7.404e-06	5.66219e-06	SiteClass[FBgn0036258|CG5642|INTRON|0],TranscriptAnnot[INTRON(MODIFIER||||539|CG5642|protein_coding|CODING|FBtr0076022|2)]	(TF_binding_site|mE1_TFBS_cad|FBsf0000244810),(TF_binding_site|mE1_TFBS_sens|FBsf0000224060)
3L_15115409_SNP	A	G	A	0.2025	33	130	-0.1594	3.088e-06	5.84254e-06	-0.1258	0.0002344	0.000350254	-0.1426	1.799e-05	2.76605e-05	-0.03358	0.03421	0.039208	SiteClass[FBgn0036480|Cep135|INTRON|0;FBgn0036481|CG16959|INTRON|0;FBgn0052847|CG32847|DOWNSTREAM|8],TranscriptAnnot[DOWNSTREAM(MODIFIER||||164|CG32847|protein_coding|CODING|FBtr0075639|);INTRON(MODIFIER||||1059|Cep135|protein_coding|CODING|FBtr0075638|7);INTRON(MODIFIER||||1065|Cep135|protein_coding|CODING|FBtr0303375|7);INTRON(MODIFIER||||489|CG16959|protein_coding|CODING|FBtr0303378|3);INTRON(…	(TF_binding_site|BDTNP1_TFBS_twi|FBsf0000203873)
3R_12572172_SNP	T	A	A	0.08642	14	148	-0.1865	0.0001123	0.000294889	-0.2213	3.637e-06	5.89214e-06	-0.2039	1.161e-05	2.5405e-05	0.0348	0.1485	0.137445	SiteClass[FBgn0020556|bxd|INTRON|0],TranscriptAnnot[INTRON(MODIFIER|||||bxd|ncRNA|NON_CODING|FBtr0083341|2);INTRON(MODIFIER|||||bxd|ncRNA|NON_CODING|FBtr0083342|2);INTRON(MODIFIER|||||bxd|ncRNA|NON_CODING|FBtr0083343|1);UPSTREAM(MODIFIER|||||bxd|ncRNA|NON_CODING|FBtr0083344|)]	(regulatory_region|REDfly_CRMs|FBsf0000435191),(TF_binding_site|mE1_TFBS_cad|FBsf0000248557),(TF_binding_site|mE1_TFBS_HSA|FBsf0000372352)
3R_9146437_SNP	T	C	C	0.06211	10	151	-0.2451	1.779e-05	1.39121e-05	-0.2506	9.517e-06	1.04641e-05	-0.2479	6.789e-06	5.90772e-06	0.005441	0.8472	0.842877	SiteClass[|||],TranscriptAnnot[INTERGENIC(MODIFIER|||||||||)]	(TF_binding_site|mE1_TFBS_HSA|FBsf0000371182)
3R_8735801_SNP	A	G	G	0.4533	68	82	-0.1193	3.809e-05	6.31237e-06	-0.1193	3.028e-05	2.28669e-05	-0.1193	1.951e-05	5.93069e-06	-6.31e-06	0.9996	0.999616	SiteClass[FBgn0038090|CG10909|DOWNSTREAM|41],TranscriptAnnot[DOWNSTREAM(MODIFIER||||349|CG10909|protein_coding|CODING|FBtr0082685|);INTERGENIC(MODIFIER|||||||||)]	-
3R_8959393_SNP	G	C	C	0.2532	40	118	0.1413	1.236e-05	5.95775e-06	0.1293	5.553e-05	8.57146e-05	0.1353	1.58e-05	1.21491e-05	0.01197	0.4184	0.435938	SiteClass[FBgn0038118|timeout|INTRON|0;FBgn0260793|2mit|INTRON|0],TranscriptAnnot[INTRON(MODIFIER||||1141|2mit|protein_coding|CODING|FBtr0301436|2);INTRON(MODIFIER||||1155|2mit|protein_coding|CODING|FBtr0330143|2);INTRON(MODIFIER||||1384|timeout|protein_coding|CODING|FBtr0082712|11)]	-
X_21335217_SNP	A	G	G	0.1677	28	139	-0.1533	2.253e-05	1.99029e-05	-0.1588	1.026e-05	7.48981e-06	-0.1561	8.202e-06	6.02942e-06	0.005507	0.7547	0.751804	SiteClass[|||],TranscriptAnnot[INTERGENIC(MODIFIER|||||||||)]	-
3R_5650896_DEL	T	TC	TC	0.05455	9	156	-0.2499	3.443e-05	6.05024e-06	-0.217	0.000312	0.00011611	-0.2335	6.609e-05	1.4598e-05	-0.03287	0.2547	0.253157	SiteClass[FBgn0262105|CR42858|UPSTREAM|311;FBgn0037766|Teh1|DOWNSTREAM|906],TranscriptAnnot[DOWNSTREAM(MODIFIER||||279|Teh1|protein_coding|CODING|FBtr0082151|);DOWNSTREAM(MODIFIER||||299|Teh1|protein_coding|CODING|FBtr0330082|);INTERGENIC(MODIFIER|||||||||);UPSTREAM(MODIFIER|||||CR42858|ncRNA|NON_CODING|FBtr0304027|)]	(TF_binding_site|mE1_TFBS_cad|FBsf0000248019),(TF_binding_site|mE1_TFBS_chinmo|FBsf0000212425)
3R_9013967_SNP	A	G	G	0.08176	13	146	-0.1953	8.75e-05	6.11167e-06	-0.1788	0.0003729	3.53537e-05	-0.1871	0.0001205	7.43572e-06	-0.01649	0.4779	0.497739	SiteClass[FBgn0038124|CG14380|UPSTREAM|320],TranscriptAnnot[INTERGENIC(MODIFIER|||||||||);UPSTREAM(MODIFIER||||168|CG14380|protein_coding|CODING|FBtr0300768|)]	(TF_binding_site|mE1_TFBS_cad|FBsf0000248251)
3R_9059524_SNP	A	T	T	0.271	42	113	-0.1539	1.501e-06	6.23517e-06	-0.1466	4.263e-06	4.31711e-05	-0.1503	1.252e-06	8.40587e-06	-0.007315	0.6339	0.630062	SiteClass[FBgn0000024|Ace|INTRON|0],TranscriptAnnot[INTRON(MODIFIER||||636|Ace|protein_coding|CODING|FBtr0335223|7);INTRON(MODIFIER||||649|Ace|protein_coding|CODING|FBtr0082780|7);INTRON(MODIFIER||||649|Ace|protein_coding|CODING|FBtr0300486|8)]	-
3L_10508693_DEL	A	AA	AA	0.07738	13	155	-0.08861	0.08255	0.0743123	0.01783	0.7276	0.688952	-0.03539	0.4765	0.474405	-0.1064	7.765e-06	6.23738e-06	SiteClass[FBgn0052062|A2bp1|INTRON|0],TranscriptAnnot[INTRON(MODIFIER||||858|A2bp1|protein_coding|CODING|FBtr0305097|2);INTRON(MODIFIER||||962|A2bp1|protein_coding|CODING|FBtr0305093|2);UPSTREAM(MODIFIER||||547|A2bp1|protein_coding|CODING|FBtr0332985|);UPSTREAM(MODIFIER||||763|A2bp1|protein_coding|CODING|FBtr0113419|);UPSTREAM(MODIFIER||||796|A2bp1|protein_coding|CODING|FBtr0305094|);UPSTREAM(MOD…	(TF_binding_site|BDTNP1_TFBS_dl|FBsf0000306666),(TF_binding_site|BDTNP1_TFBS_hb|FBsf0000291309),(TF_binding_site|BDTNP1_TFBS_Med|FBsf0000282684),(TF_binding_site|BDTNP1_TFBS_twi|FBsf0000203404),(TF_binding_site|mE1_TFBS_HSA|FBsf0000363937)
3R_9001373_SNP	A	G	G	0.05696	9	149	-0.2362	7.997e-05	6.87347e-06	-0.2243	0.000175	2.33023e-05	-0.2302	7.283e-05	6.26447e-06	-0.01192	0.6808	0.679423	SiteClass[|||],TranscriptAnnot[INTERGENIC(MODIFIER|||||||||)]	-
X_11144492_SNP	C	T	T	0.3252	53	110	-0.1126	0.0001285	4.77059e-05	-0.1247	1.912e-05	6.31848e-06	-0.1186	2.919e-05	9.02355e-06	0.01212	0.4	0.387938	SiteClass[FBgn0261569|CG42683|INTRON|0],TranscriptAnnot[INTRON(MODIFIER||||436|CG42683|protein_coding|CODING|FBtr0302839|2);INTRON(MODIFIER||||439|CG42683|protein_coding|CODING|FBtr0332902|2);INTRON(MODIFIER||||450|CG42683|protein_coding|CODING|FBtr0303042|2);INTRON(MODIFIER||||746|CG42683|protein_coding|CODING|FBtr0302838|2)]	-
3R_13042345_SNP	A	G	G	0.3208	51	108	-0.1119	0.0002148	0.000491505	-0.1362	4.264e-06	6.40866e-06	-0.1241	2.009e-05	3.61231e-05	0.02424	0.08477	0.0883164	SiteClass[FBgn0051262|CG31262|DOWNSTREAM|493],TranscriptAnnot[DOWNSTREAM(MODIFIER||||128|CG31262|protein_coding|CODING|FBtr0300361|);DOWNSTREAM(MODIFIER||||579|CG31262|protein_coding|CODING|FBtr0300053|);DOWNSTREAM(MODIFIER||||579|CG31262|protein_coding|CODING|FBtr0302852|);DOWNSTREAM(MODIFIER||||89|CG31262|protein_coding|CODING|FBtr0302853|);INTERGENIC(MODIFIER|||||||||)]	-
3R_8953718_SNP	T	C	C	0.1273	21	144	-0.1873	4.753e-06	6.59236e-06	-0.1471	0.0003693	0.000833442	-0.1672	2.809e-05	4.99337e-05	-0.0402	0.04175	0.0394201	SiteClass[FBgn0038118|timeout|INTRON|0;FBgn0260793|2mit|NON_SYNONYMOUS_CODING|0],TranscriptAnnot[INTRON(MODIFIER||||1384|timeout|protein_coding|CODING|FBtr0082712|11);NON_SYNONYMOUS_CODING(MODERATE|MISSENSE|gGt/gAt|G514D|1141|2mit|protein_coding|CODING|FBtr0301436|);NON_SYNONYMOUS_CODING(MODERATE|MISSENSE|gGt/gAt|G514D|1155|2mit|protein_coding|CODING|FBtr0330143|)]	-
2L_6388132_SNP	A	G	G	0.05952	10	158	0.1037	0.07421	0.0603333	-0.01617	0.7807	0.79341	0.04378	0.4386	0.403901	0.1199	7.997e-06	6.60475e-06	SiteClass[FBgn0259714|CG42368|INTRON|0],TranscriptAnnot[INTRON(MODIFIER||||467|CG42368|protein_coding|CODING|FBtr0299967|4)]	-
3R_9006941_SNP	T	C	C	0.415	61	86	-0.1137	0.0001662	1.04112e-05	-0.1144	0.0001199	1.75409e-05	-0.114	8.658e-05	6.67069e-06	0.0006686	0.9637	0.962122	SiteClass[FBgn0038122|CG8138|UPSTREAM|85],TranscriptAnnot[INTERGENIC(MODIFIER|||||||||);UPSTREAM(MODIFIER||||233|CG8138|protein_coding|CODING|FBtr0082732|)]	-
3R_9039840_SNP	A	T	A	0.46	69	81	0.1334	3.705e-06	6.74944e-06	0.119	3.602e-05	7.45474e-05	0.1262	6.158e-06	1.19357e-05	0.01436	0.3151	0.296426	SiteClass[FBgn0038126|CG8483|NON_SYNONYMOUS_CODING|0],TranscriptAnnot[NON_SYNONYMOUS_CODING(MODERATE|MISSENSE|Ttc/Atc|F21I|392|CG8483|protein_coding|CODING|FBtr0082782|)]	(TF_binding_site|BDTNP1_TFBS_dl|FBsf0000311411),(TF_binding_site|BDTNP1_TFBS_Med|FBsf0000285179)
3R_8993017_SNP	C	T	T	0.2065	32	123	-0.1288	0.0002346	8.57127e-06	-0.1236	0.0004199	2.27072e-05	-0.1262	0.0002028	6.93087e-06	-0.005269	0.7581	0.752069	SiteClass[|||],TranscriptAnnot[INTERGENIC(MODIFIER|||||||||)]	-
3R_8928442_SNP	G	C	C	0.3	48	112	-0.1471	8.837e-07	6.95827e-06	-0.1207	6.141e-05	0.000317239	-0.1339	4.213e-06	2.83259e-05	-0.02645	0.07225	0.0667973	SiteClass[FBgn0038118|timeout|INTRON|0],TranscriptAnnot[INTRON(MODIFIER||||1384|timeout|protein_coding|CODING|FBtr0082712|7)]	-
X_21335276_SNP	G	T	T	0.1472	24	139	-0.1526	8.527e-05	2.48812e-05	-0.1588	4.241e-05	7.79511e-06	-0.1557	3.539e-05	6.96649e-06	0.006221	0.7417	0.73774	SiteClass[|||],TranscriptAnnot[INTERGENIC(MODIFIER|||||||||)]	-
3R_9031539_SNP	T	C	C	0.2157	33	120	-0.1664	1.727e-06	7.06366e-06	-0.1503	1.592e-05	0.000287838	-0.1584	2.764e-06	2.69137e-05	-0.0161	0.3376	0.329274	SiteClass[|||],TranscriptAnnot[INTERGENIC(MODIFIER|||||||||)]	-
3R_9000945_SNP	T	A	A	0.2821	44	112	0.131	3.293e-05	7.13942e-06	0.1053	0.0008481	0.000706662	0.1182	0.0001129	4.67554e-05	0.02575	0.09437	0.0837316	SiteClass[|||],TranscriptAnnot[INTERGENIC(MODIFIER|||||||||)]	-
3R_9147234_SNP	A	G	A	0.4129	64	91	-0.1399	9.877e-07	7.2016e-06	-0.1261	9.016e-06	5.08942e-05	-0.133	1.473e-06	9.92761e-06	-0.01375	0.3254	0.315204	SiteClass[|||],TranscriptAnnot[INTERGENIC(MODIFIER|||||||||)]	-
2R_13221676_SNP	C	G	G	0.1317	22	145	0.01727	0.6743	0.575815	-0.06649	0.1031	0.161392	-0.02461	0.5368	0.668001	0.08376	9.536e-06	7.31321e-06	SiteClass[FBgn0261642|mbl|INTRON|0],TranscriptAnnot[INTRON(MODIFIER||||203|mbl|protein_coding|CODING|FBtr0086991|2);INTRON(MODIFIER||||243|mbl|protein_coding|CODING|FBtr0086994|2);INTRON(MODIFIER||||297|mbl|protein_coding|CODING|FBtr0086992|2);INTRON(MODIFIER||||535|mbl|protein_coding|CODING|FBtr0310058|2);INTRON(MODIFIER||||583|mbl|protein_coding|CODING|FBtr0310059|2);INTRON(MODIFIER||||667|mbl|…	-
3R_13850568_SNP	G	A	A	0.07927	13	151	-0.2254	9.201e-06	7.40574e-06	-0.2037	6.161e-05	0.000125221	-0.2146	1.355e-05	1.68601e-05	-0.0217	0.3795	0.371308	SiteClass[FBgn0038565|CG7794|SYNONYMOUS_CODING|0],TranscriptAnnot[SYNONYMOUS_CODING(LOW|SILENT|agA/agG|R305|455|CG7794|protein_coding|CODING|FBtr0083540|)]	(TF_binding_site|mE1_TFBS_cad|FBsf0000248657)
3R_8942085_SNP	G	A	G	0.327	52	107	-0.1362	3.859e-06	7.42924e-06	-0.1272	1.579e-05	7.49582e-05	-0.1317	3.984e-06	1.25659e-05	-0.008977	0.5388	0.527333	SiteClass[FBgn0038118|timeout|INTRON|0],TranscriptAnnot[INTRON(MODIFIER||||1384|timeout|protein_coding|CODING|FBtr0082712|11)]	-
3R_9110674_SNP	T	C	T	0.4932	73	75	0.1428	5.341e-07	7.62744e-06	0.129	7.168e-06	9.29383e-05	0.1359	1.094e-06	1.44025e-05	0.0138	0.2814	0.317316	SiteClass[FBgn0038131|CG15888|UTR_3_PRIME|0;FBgn0038130|CG8630|DOWNSTREAM|425],TranscriptAnnot[DOWNSTREAM(MODIFIER||||408|CG8630|protein_coding|CODING|FBtr0082737|);UTR_3_PRIME(MODIFIER||||319|CG15888|protein_coding|CODING|FBtr0100257|2)]	-
3R_8979318_SNP	C	G	G	0.2342	37	121	0.1464	1.002e-05	7.69506e-06	0.1292	9.477e-05	8.40459e-05	0.1378	1.77e-05	1.36553e-05	0.01725	0.2891	0.273805	SiteClass[FBgn0038118|timeout|INTRON|0;FBgn0260793|2mit|INTRON|0],TranscriptAnnot[INTRON(MODIFIER||||1141|2mit|protein_coding|CODING|FBtr0301436|2);INTRON(MODIFIER||||1155|2mit|protein_coding|CODING|FBtr0330143|2);INTRON(MODIFIER||||1384|timeout|protein_coding|CODING|FBtr0082712|11)]	(TF_binding_site|mE1_TFBS_HSA|FBsf0000371147),(TF_binding_site|mE1_TFBS_inv|FBsf0000237168)
3R_8976984_SNP	A	T	T	0.2468	39	119	0.1421	1.034e-05	7.75613e-06	0.1216	0.0001522	0.000237202	0.1318	2.319e-05	2.50926e-05	0.02058	0.1973	0.183504	SiteClass[FBgn0038118|timeout|INTRON|0;FBgn0260793|2mit|INTRON|0],TranscriptAnnot[INTRON(MODIFIER||||1141|2mit|protein_coding|CODING|FBtr0301436|2);INTRON(MODIFIER||||1155|2mit|protein_coding|CODING|FBtr0330143|2);INTRON(MODIFIER||||1384|timeout|protein_coding|CODING|FBtr0082712|11)]	-
3R_11106669_SNP	C	T	T	0.1118	18	143	-0.179	5.436e-05	0.000138534	-0.2005	4.391e-06	7.79273e-06	-0.1898	9.109e-06	1.85394e-05	0.02151	0.3009	0.305627	SiteClass[FBgn0003721|Tm1|UPSTREAM|424],TranscriptAnnot[INTERGENIC(MODIFIER|||||||||);UPSTREAM(MODIFIER||||161|Tm1|protein_coding|CODING|FBtr0305655|);UPSTREAM(MODIFIER||||284|Tm1|protein_coding|CODING|FBtr0089968|);UPSTREAM(MODIFIER||||285|Tm1|protein_coding|CODING|FBtr0089964|);UPSTREAM(MODIFIER||||285|Tm1|protein_coding|CODING|FBtr0089967|);UPSTREAM(MODIFIER||||285|Tm1|protein_coding|CODING|FB…	(TF_binding_site|BDTNP1_TFBS_dl|FBsf0000311845),(TF_binding_site|BDTNP1_TFBS_Med|FBsf0000285410),(TF_binding_site|BDTNP1_TFBS_sna|FBsf0000271027),(TF_binding_site|BDTNP1_TFBS_twi|FBsf0000265066),(TF_binding_site|mE1_TFBS_HSA|FBsf0000371786),(TF_binding_site|mE1_TFBS_Trl|FBsf0000341112)
X_16264169_SNP	G	A	G	0.07547	12	147	-0.1812	0.0004704	8.35796e-05	-0.2164	2.184e-05	7.84246e-06	-0.1988	6.765e-05	1.3867e-05	0.03524	0.1532	0.16145	SiteClass[FBgn0004227|nonA|INTRON|0],TranscriptAnnot[INTRON(MODIFIER||||742|nonA|protein_coding|CODING|FBtr0074233|4)]	-
3R_5651319_SNP	A	T	T	0.06548	11	157	-0.2303	2.404e-05	7.85185e-06	-0.2064	0.0001548	0.00010569	-0.2184	3.695e-05	1.57355e-05	-0.02394	0.3637	0.360565	SiteClass[FBgn0037766|Teh1|DOWNSTREAM|484;FBgn0262105|CR42858|UPSTREAM|733],TranscriptAnnot[DOWNSTREAM(MODIFIER||||279|Teh1|protein_coding|CODING|FBtr0082151|);DOWNSTREAM(MODIFIER||||299|Teh1|protein_coding|CODING|FBtr0330082|);INTERGENIC(MODIFIER|||||||||);UPSTREAM(MODIFIER|||||CR42858|ncRNA|NON_CODING|FBtr0304027|)]	-
3R_8928460_SNP	T	C	C	0.3168	51	110	-0.1441	8.664e-07	8.06968e-06	-0.1207	4.307e-05	0.000245147	-0.1324	3.374e-06	2.60854e-05	-0.0234	0.106	0.0989953	SiteClass[FBgn0038118|timeout|INTRON|0],TranscriptAnnot[INTRON(MODIFIER||||1384|timeout|protein_coding|CODING|FBtr0082712|7)]	-
3R_9008466_SNP	C	T	C	0.2628	41	115	0.135	2.803e-05	8.12218e-06	0.1124	0.0004729	0.000380738	0.1237	7.388e-05	3.40479e-05	0.02252	0.1535	0.139556	SiteClass[FBgn0038122|CG8138|DOWNSTREAM|590],TranscriptAnnot[DOWNSTREAM(MODIFIER||||233|CG8138|protein_coding|CODING|FBtr0082732|);INTERGENIC(MODIFIER|||||||||)]	-
3R_8983233_SNP	A	G	A	0.1627	27	139	-0.1722	2.82e-06	8.15045e-06	-0.1437	0.0001065	0.000366275	-0.1579	1.042e-05	3.33182e-05	-0.0285	0.11	0.105569	SiteClass[FBgn0038118|timeout|INTRON|0],TranscriptAnnot[INTRON(MODIFIER||||1384|timeout|protein_coding|CODING|FBtr0082712|11)]	-
2L_17467234_SNP	T	C	C	0.0566	9	150	-0.01008	0.8683	0.789877	-0.1351	0.02481	0.0633096	-0.07258	0.2166	0.415883	0.125	1.429e-05	8.16885e-06	SiteClass[FBgn0000183|BicD|INTRON|0],TranscriptAnnot[INTRON(MODIFIER||||750|BicD|protein_coding|CODING|FBtr0305688|1);INTRON(MODIFIER||||782|BicD|protein_coding|CODING|FBtr0081002|1);INTRON(MODIFIER||||782|BicD|protein_coding|CODING|FBtr0330225|1);INTRON(MODIFIER||||802|BicD|protein_coding|CODING|FBtr0330226|1)]	(TF_binding_site|mE1_TFBS_inv|FBsf0000235016)
3R_8943566_SNP	A	T	T	0.3072	47	106	0.1411	3.958e-06	8.19333e-06	0.11	0.0003499	0.000715188	0.1255	2.536e-05	5.0234e-05	0.03115	0.03125	0.0332791	SiteClass[FBgn0038118|timeout|INTRON|0],TranscriptAnnot[INTRON(MODIFIER||||1384|timeout|protein_coding|CODING|FBtr0082712|11)]	-
3R_25433795_SNP	A	T	T	0.06024	10	156	-0.005104	0.93	0.718148	-0.1239	0.03141	0.0673036	-0.06449	0.2516	0.452897	0.1188	1.098e-05	8.22919e-06	SiteClass[FBgn0086361|alph|INTRON|0;FBgn0262873|Diedel2|UPSTREAM|404],TranscriptAnnot[INTRON(MODIFIER||||374|alph|protein_coding|CODING|FBtr0085444|6);UPSTREAM(MODIFIER||||125|Diedel2|protein_coding|CODING|FBtr0306279|)]	-
3R_26756974_DEL	G	GG	GG	0.05882	9	144	-0.2381	8.327e-05	8.36088e-06	-0.1875	0.002228	0.00039191	-0.2128	0.0003197	3.51305e-05	-0.05062	0.08363	0.0783247	SiteClass[FBgn0020912|Ptx1|DOWNSTREAM|571],TranscriptAnnot[DOWNSTREAM(MODIFIER||||318|Ptx1|protein_coding|CODING|FBtr0089390|);DOWNSTREAM(MODIFIER||||514|Ptx1|protein_coding|CODING|FBtr0089391|);INTERGENIC(MODIFIER|||||||||)]	-
3R_6386599_SNP	C	G	G	0.06748	11	152	-0.2307	2.204e-05	8.38536e-06	-0.1794	0.001142	0.000416214	-0.205	0.0001145	3.64811e-05	-0.05127	0.05165	0.0495068	SiteClass[FBgn0001235|hth|INTRON|0],TranscriptAnnot[INTRON(MODIFIER||||218|hth|protein_coding|CODING|FBtr0301345|1);INTRON(MODIFIER||||458|hth|protein_coding|CODING|FBtr0301956|6);INTRON(MODIFIER||||472|hth|protein_coding|CODING|FBtr0082256|7);INTRON(MODIFIER||||487|hth|protein_coding|CODING|FBtr0082255|7)]	(TF_binding_site|mE1_TFBS_HSA|FBsf0000370320)
3L_5056614_SNP	A	G	G	0.1928	32	134	0.0254	0.4685	0.382939	-0.04614	0.1864	0.370264	-0.01037	0.7606	0.992947	0.07154	1.013e-05	8.50033e-06	SiteClass[FBgn0005775|Con|INTRON|0],TranscriptAnnot[INTRON(MODIFIER||||691|Con|protein_coding|CODING|FBtr0309972|2)]	-
3R_6728127_SNP	C	T	T	0.09317	15	146	-0.2208	3.411e-06	1.06767e-05	-0.2119	7.083e-06	2.68597e-05	-0.2163	2.436e-06	8.52751e-06	-0.008907	0.7026	0.695919	SiteClass[|||],TranscriptAnnot[INTERGENIC(MODIFIER|||||||||)]	-
3L_5056703_SNP	T	A	A	0.1939	32	133	0.009201	0.7939	0.678961	-0.06233	0.07497	0.179488	-0.02656	0.4368	0.635	0.07153	1.093e-05	8.65e-06	SiteClass[FBgn0005775|Con|INTRON|0],TranscriptAnnot[INTRON(MODIFIER||||691|Con|protein_coding|CODING|FBtr0309972|2)]	-
3R_9031356_SNP	G	T	T	0.2148	32	117	-0.1437	4.601e-05	8.68338e-06	-0.1238	0.0004358	0.000621398	-0.1337	8.833e-05	4.73421e-05	-0.01989	0.2579	0.234551	SiteClass[|||],TranscriptAnnot[INTERGENIC(MODIFIER|||||||||)]	-
3R_11694983_SNP	G	A	A	0.08982	15	152	-0.2128	5.436e-06	1.48126e-05	-0.2054	1.102e-05	2.06114e-05	-0.2091	3.951e-06	8.7801e-06	-0.007432	0.7468	0.743897	SiteClass[FBgn0051183|CG31183|SYNONYMOUS_CODING|0],TranscriptAnnot[SYNONYMOUS_CODING(LOW|SILENT|caT/caC|H264|1417|CG31183|protein_coding|CODING|FBtr0083187|)]	(TF_binding_site|mE1_TFBS_cad|FBsf0000248470)
3R_9026735_SNP	A	T	T	0.1788	27	124	0.1637	1.333e-05	8.78633e-06	0.1494	5.895e-05	0.000129417	0.1566	1.528e-05	1.87082e-05	0.01429	0.4456	0.423066	SiteClass[|||],TranscriptAnnot[INTERGENIC(MODIFIER|||||||||)]	-
3R_25385181_SNP	T	C	C	0.05357	9	159	-0.06334	0.3029	0.331336	-0.1877	0.001895	0.000776951	-0.1255	0.03439	0.0264066	0.1243	8.86e-06	8.90408e-06	SiteClass[FBgn0000492|Dr|INTRON|0],TranscriptAnnot[INTRON(MODIFIER||||515|Dr|protein_coding|CODING|FBtr0085441|1)]	(TF_binding_site|BDTNP1_TFBS_da|FBsf0000330813),(TF_binding_site|BDTNP1_TFBS_dl|FBsf0000314613),(TF_binding_site|BDTNP1_TFBS_hb|FBsf0000292880),(TF_binding_site|BDTNP1_TFBS_Med|FBsf0000286874),(TF_binding_site|BDTNP1_TFBS_prd|FBsf0000276927),(TF_binding_site|BDTNP1_TFBS_slp1|FBsf0000273259),(TF_binding_site|BDTNP1_TFBS_twi|FBsf0000266348),(TF_binding_site|mE1_TFBS_HSA|FBsf0000376371),(TF_binding_…
2R_8169319_SNP	T	A	A	0.05357	9	159	-0.2347	9.084e-05	0.000198337	-0.2701	5.205e-06	8.90659e-06	-0.2524	1.274e-05	2.44431e-05	0.03535	0.2234	0.218761	SiteClass[FBgn0261611|CG42700|INTRON|0],TranscriptAnnot[INTRON(MODIFIER||||370|CG42700|protein_coding|CODING|FBtr0302922|1)]	-
3L_8863043_SNP	A	G	G	0.06098	10	154	-0.02795	0.6322	0.608496	0.09043	0.1172	0.0990937	0.03124	0.5799	0.561706	-0.1184	1.348e-05	8.93036e-06	SiteClass[FBgn0263930|dally|INTRON|0],TranscriptAnnot[INTRON(MODIFIER||||626|dally|protein_coding|CODING|FBtr0076583|1);INTRON(MODIFIER||||626|dally|protein_coding|CODING|FBtr0305901|1)]	-
3R_8930122_SNP	C	A	A	0.283	45	114	-0.1421	3.957e-06	8.93239e-06	-0.1138	0.0002414	0.000921627	-0.1279	1.988e-05	6.12127e-05	-0.02822	0.05787	0.0552182	SiteClass[FBgn0038118|timeout|INTRON|0],TranscriptAnnot[INTRON(MODIFIER||||1384|timeout|protein_coding|CODING|FBtr0082712|7)]	-
X_8921321_SNP	A	T	A	0.3988	65	98	-0.09974	0.0003947	3.22171e-05	-0.1134	4.935e-05	9.63646e-06	-0.1066	8.916e-05	8.97516e-06	0.01366	0.3177	0.309038	SiteClass[FBgn0264384|CR43836|INTRON|0;FBgn0261549|rdgA|UTR_3_PRIME|0],TranscriptAnnot[INTRON(MODIFIER|||||CR43836|ncRNA|NON_CODING|FBtr0332279|2);INTRON(MODIFIER|||||CR43836|ncRNA|NON_CODING|FBtr0332280|2);INTRON(MODIFIER|||||CR43836|ncRNA|NON_CODING|FBtr0332281|2);UTR_3_PRIME(MODIFIER||||1460|rdgA|protein_coding|CODING|FBtr0333602|16);UTR_3_PRIME(MODIFIER||||1462|rdgA|protein_coding|CODING|FBtr…	-
3R_8988200_SNP	A	G	G	0.1242	20	141	0.1496	0.0004315	6.32399e-05	0.1689	6.372e-05	9.02622e-06	0.1592	0.0001068	1.26858e-05	-0.01927	0.3487	0.336637	SiteClass[FBgn0038118|timeout|SYNONYMOUS_CODING|0],TranscriptAnnot[SYNONYMOUS_CODING(LOW|SILENT|caG/caA|Q943|1384|timeout|protein_coding|CODING|FBtr0082712|)]	-
3R_11587802_SNP	G	T	T	0.06587	11	156	-0.1884	0.0006306	0.00319031	-0.256	2.241e-06	9.02858e-06	-0.2222	2.773e-05	0.000139474	0.06758	0.01023	0.00925073	SiteClass[|||],TranscriptAnnot[INTERGENIC(MODIFIER|||||||||)]	-
X_8907187_SNP	A	G	G	0.07273	12	153	0.08106	0.1324	0.0728477	-0.02761	0.6097	0.685953	0.02673	0.6109	0.472825	0.1087	1.228e-05	9.07386e-06	SiteClass[FBgn0264384|CR43836|INTRON|0;FBgn0261549|rdgA|INTRON|0],TranscriptAnnot[INTRON(MODIFIER||||1009|rdgA|protein_coding|CODING|FBtr0302663|3);INTRON(MODIFIER||||1027|rdgA|protein_coding|CODING|FBtr0302661|2);INTRON(MODIFIER||||1452|rdgA|protein_coding|CODING|FBtr0302665|3);INTRON(MODIFIER||||1457|rdgA|protein_coding|CODING|FBtr0302660|3);INTRON(MODIFIER||||1460|rdgA|protein_coding|CODING|FB…	-
3L_5056745_SNP	G	C	C	0.1951	32	132	0.007581	0.8296	0.660113	-0.06384	0.06844	0.184837	-0.02813	0.4104	0.65059	0.07142	1.213e-05	9.09128e-06	SiteClass[FBgn0005775|Con|INTRON|0],TranscriptAnnot[INTRON(MODIFIER||||691|Con|protein_coding|CODING|FBtr0309972|2)]	-
3R_8942159_SNP	C	T	C	0.3376	53	104	-0.1325	6.627e-06	9.14433e-06	-0.1261	2.205e-05	5.58889e-05	-0.1293	6.47e-06	1.18225e-05	-0.00642	0.6569	0.650779	SiteClass[FBgn0038118|timeout|INTRON|0],TranscriptAnnot[INTRON(MODIFIER||||1384|timeout|protein_coding|CODING|FBtr0082712|11)]	-
X_7991373_SNP	C	T	T	0.1807	30	136	0.1077	0.002488	0.000109817	0.1273	0.000308	9.18224e-06	0.1175	0.000633	1.75612e-05	-0.01959	0.2539	0.247081	SiteClass[FBgn0029997|CG2258|SYNONYMOUS_CODING|0],TranscriptAnnot[SYNONYMOUS_CODING(LOW|SILENT|ctA/ctG|L621|801|CG2258|protein_coding|CODING|FBtr0071109|);SYNONYMOUS_CODING(LOW|SILENT|ctA/ctG|L621|801|CG2258|protein_coding|CODING|FBtr0071110|);SYNONYMOUS_CODING(LOW|SILENT|ctA/ctG|L621|801|CG2258|protein_coding|CODING|FBtr0071111|)]	(TF_binding_site|mE1_TFBS_HSA|FBsf0000380469)
X_10575742_SNP	T	C	T	0.2562	41	119	0.1291	4.923e-05	2.05232e-05	0.13	3.895e-05	1.6349e-05	0.1296	2.64e-05	9.24183e-06	-0.0009164	0.9506	0.952011	SiteClass[FBgn0052677|X11Lbeta|INTRON|0],TranscriptAnnot[INTRON(MODIFIER||||2063|X11Lbeta|protein_coding|CODING|FBtr0310298|3);INTRON(MODIFIER||||2139|X11Lbeta|protein_coding|CODING|FBtr0071493|3)]	-
3R_8989800_SNP	T	C	C	0.1084	18	148	-0.1717	9.31e-05	2.62079e-05	-0.1798	3.955e-05	1.2774e-05	-0.1757	3.639e-05	9.27158e-06	0.008065	0.7012	0.700694	SiteClass[FBgn0038118|timeout|DOWNSTREAM|202],TranscriptAnnot[DOWNSTREAM(MODIFIER||||1384|timeout|protein_coding|CODING|FBtr0082712|);INTERGENIC(MODIFIER|||||||||)]	-
3R_10219619_SNP	T	C	T	0.2595	41	117	-0.1388	1.549e-05	9.36425e-06	-0.1086	0.0007832	0.000637757	-0.1237	7.596e-05	4.98446e-05	-0.03023	0.05326	0.0462966	SiteClass[FBgn0086901|cv-c|SYNONYMOUS_CODING|0],TranscriptAnnot[SYNONYMOUS_CODING(LOW|SILENT|caA/caG|Q2041|2351|cv-c|protein_coding|CODING|FBtr0112630|);SYNONYMOUS_CODING(LOW|SILENT|caA/caG|Q2041|2351|cv-c|protein_coding|CODING|FBtr0112632|);SYNONYMOUS_CODING(LOW|SILENT|caA/caG|Q707|1017|cv-c|protein_coding|CODING|FBtr0112631|)]	-
3R_8968047_SNP	T	G	G	0.3487	53	99	0.1224	4.673e-05	9.59541e-06	0.1037	0.0005922	0.000273785	0.113	0.0001087	3.02977e-05	0.01874	0.2036	0.189257	SiteClass[FBgn0038118|timeout|INTRON|0;FBgn0260793|2mit|INTRON|0],TranscriptAnnot[INTRON(MODIFIER||||1141|2mit|protein_coding|CODING|FBtr0301436|2);INTRON(MODIFIER||||1155|2mit|protein_coding|CODING|FBtr0330143|2);INTRON(MODIFIER||||1384|timeout|protein_coding|CODING|FBtr0082712|11)]	-
3R_6133080_SNP	C	T	T	0.3158	48	104	-0.131	1.688e-05	1.9532e-05	-0.1339	8.796e-06	1.86348e-05	-0.1324	6.301e-06	9.64699e-06	0.002887	0.8484	0.843984	SiteClass[FBgn0262617|CG43143|SYNONYMOUS_CODING|0;FBgn0037807|CG6293|DOWNSTREAM|448],TranscriptAnnot[DOWNSTREAM(MODIFIER||||573|CG6293|protein_coding|CODING|FBtr0082240|);DOWNSTREAM(MODIFIER||||573|CG6293|protein_coding|CODING|FBtr0337051|);SYNONYMOUS_CODING(LOW|SILENT|agT/agC|S2517|2537|CG43143|protein_coding|CODING|FBtr0305355|);SYNONYMOUS_CODING(LOW|SILENT|agT/agC|S2536|2556|CG43143|protein_co…	(TF_binding_site|mE1_TFBS_cad|FBsf0000248050),(TF_binding_site|mE1_TFBS_chinmo|FBsf0000212448),(TF_binding_site|mE1_TFBS_HSA|FBsf0000370232),(TF_binding_site|mE1_TFBS_sens|FBsf0000231096)
3R_9000985_SNP	A	G	G	0.3205	50	106	0.1268	2.531e-05	9.67334e-06	0.1047	0.0005489	0.000504131	0.1158	7.766e-05	4.38575e-05	0.02215	0.1319	0.123261	SiteClass[|||],TranscriptAnnot[INTERGENIC(MODIFIER|||||||||)]	-
2L_20689700_SNP	C	G	C	0.1195	19	140	-0.1747	3.668e-05	3.24565e-05	-0.1848	1.535e-05	1.13508e-05	-0.1798	1.343e-05	9.80929e-06	0.01013	0.6193	0.621842	SiteClass[FBgn0014859|Hr38|INTRON|0],TranscriptAnnot[INTRON(MODIFIER||||1078|Hr38|protein_coding|CODING|FBtr0081397|2);INTRON(MODIFIER||||836|Hr38|protein_coding|CODING|FBtr0301347|3)]	(TF_binding_site|BDTNP1_TFBS_slp1|FBsf0000271946),(TF_binding_site|mE1_TFBS_cad|FBsf0000242506),(TF_binding_site|mE1_TFBS_chinmo|FBsf0000207907)
3R_9006961_SNP	T	G	G	0.396	59	90	-0.1166	9.701e-05	1.49542e-05	-0.1168	7.09e-05	2.51712e-05	-0.1167	5.228e-05	9.83159e-06	0.0001613	0.9906	0.990877	SiteClass[FBgn0038122|CG8138|UPSTREAM|65],TranscriptAnnot[INTERGENIC(MODIFIER|||||||||);UPSTREAM(MODIFIER||||233|CG8138|protein_coding|CODING|FBtr0082732|)]	-
3R_13042266_INS	AA	A	A	0.3724	54	91	-0.1003	0.0008706	0.00511092	-0.141	2.32e-06	9.85118e-06	-0.1206	3.542e-05	0.000198865	0.04068	0.00343	0.00435981	SiteClass[FBgn0051262|CG31262|DOWNSTREAM|571],TranscriptAnnot[DOWNSTREAM(MODIFIER||||128|CG31262|protein_coding|CODING|FBtr0300361|);DOWNSTREAM(MODIFIER||||579|CG31262|protein_coding|CODING|FBtr0300053|);DOWNSTREAM(MODIFIER||||579|CG31262|protein_coding|CODING|FBtr0302852|);DOWNSTREAM(MODIFIER||||89|CG31262|protein_coding|CODING|FBtr0302853|);INTERGENIC(MODIFIER|||||||||)]	-
3R_8989597_SNP	C	T	T	0.06748	11	152	-0.2105	0.0001231	1.83172e-05	-0.2119	0.0001028	2.07445e-05	-0.2112	6.883e-05	9.8699e-06	0.001317	0.9604	0.959995	SiteClass[FBgn0038118|timeout|UTR_3_PRIME|0],TranscriptAnnot[UTR_3_PRIME(MODIFIER||||1384|timeout|protein_coding|CODING|FBtr0082712|18)]	-
3R_9076608_SNP	C	T	T	0.1333	22	143	-0.196	9.498e-07	9.92333e-06	-0.1746	1.316e-05	9.91998e-05	-0.1853	1.831e-06	1.70628e-05	-0.02149	0.2672	0.263519	SiteClass[FBgn0000024|Ace|INTRON|0],TranscriptAnnot[INTRON(MODIFIER||||636|Ace|protein_coding|CODING|FBtr0335223|1);INTRON(MODIFIER||||649|Ace|protein_coding|CODING|FBtr0082780|1);INTRON(MODIFIER||||649|Ace|protein_coding|CODING|FBtr0300486|2)]	-
3R_9033085_SNP	A	G	A	0.3725	57	96	0.1475	3.871e-07	1.00046e-05	0.1266	1.744e-05	0.000160677	0.1371	1.364e-06	2.2621e-05	0.02089	0.1459	0.13592	SiteClass[|||],TranscriptAnnot[INTERGENIC(MODIFIER|||||||||)]	-
3R_8898854_SNP	A	G	G	0.2822	46	117	-0.1402	4.079e-06	1.02185e-05	-0.1222	5.788e-05	0.000194788	-0.1312	8.721e-06	2.55722e-05	-0.01796	0.2222	0.218468	SiteClass[FBgn0004666|sim|INTRON|0],TranscriptAnnot[INTRON(MODIFIER||||664|sim|protein_coding|CODING|FBtr0082711|2);INTRON(MODIFIER||||672|sim|protein_coding|CODING|FBtr0334614|2);INTRON(MODIFIER||||675|sim|protein_coding|CODING|FBtr0334613|2);INTRON(MODIFIER||||688|sim|protein_coding|CODING|FBtr0082710|2)]	(TF_binding_site|BDTNP1_TFBS_da|FBsf0000329054),(TF_binding_site|BDTNP1_TFBS_dl|FBsf0000311405),(TF_binding_site|BDTNP1_TFBS_Med|FBsf0000285175),(TF_binding_site|BDTNP1_TFBS_prd|FBsf0000276478),(TF_binding_site|BDTNP1_TFBS_sna|FBsf0000270952),(TF_binding_site|BDTNP1_TFBS_tll|FBsf0000267185),(TF_binding_site|BDTNP1_TFBS_twi|FBsf0000264847),(TF_binding_site|mE1_TFBS_cad|FBsf0000248250),(TF_binding_…
3R_8937676_DEL	T	TT	TT	0.1793	26	119	0.1738	4.088e-06	1.05683e-05	0.1403	0.000179	0.00137271	0.157	1.55e-05	8.49375e-05	0.03345	0.08115	0.0646932	SiteClass[FBgn0038118|timeout|INTRON|0],TranscriptAnnot[INTRON(MODIFIER||||1384|timeout|protein_coding|CODING|FBtr0082712|10)]	-
3R_9136252_SNP	C	T	T	0.3711	59	100	-0.124	1.539e-05	1.37187e-05	-0.1242	1.25e-05	3.27927e-05	-0.1241	7.301e-06	1.08505e-05	0.000143	0.9919	0.99174	SiteClass[FBgn0052473|CG32473|SYNONYMOUS_CODING|0],TranscriptAnnot[SYNONYMOUS_CODING(LOW|SILENT|taT/taC|Y274|903|CG32473|protein_coding|CODING|FBtr0082744|);SYNONYMOUS_CODING(LOW|SILENT|taT/taC|Y383|1012|CG32473|protein_coding|CODING|FBtr0082742|);SYNONYMOUS_CODING(LOW|SILENT|taT/taC|Y396|1025|CG32473|protein_coding|CODING|FBtr0082743|)]	(TF_binding_site|mE1_TFBS_HSA|FBsf0000371180),(TF_binding_site|mE1_TFBS_sens|FBsf0000231545)
3R_13030058_SNP	A	C	C	0.2516	39	116	-0.1352	3.482e-05	0.000136985	-0.1523	1.958e-06	1.10297e-05	-0.1437	4.713e-06	2.18615e-05	0.01704	0.2688	0.272537	SiteClass[|||],TranscriptAnnot[INTERGENIC(MODIFIER|||||||||)]	-
3R_13042452_SNP	A	G	G	0.3063	49	111	-0.09362	0.002128	0.00339793	-0.1339	9.542e-06	1.14959e-05	-0.1138	0.0001154	0.000161682	0.04029	0.004931	0.00469429	SiteClass[FBgn0051262|CG31262|DOWNSTREAM|386],TranscriptAnnot[DOWNSTREAM(MODIFIER||||128|CG31262|protein_coding|CODING|FBtr0300361|);DOWNSTREAM(MODIFIER||||579|CG31262|protein_coding|CODING|FBtr0300053|);DOWNSTREAM(MODIFIER||||579|CG31262|protein_coding|CODING|FBtr0302852|);DOWNSTREAM(MODIFIER||||89|CG31262|protein_coding|CODING|FBtr0302853|);INTERGENIC(MODIFIER|||||||||)]	-
3R_8887710_SNP	C	T	T	0.2177	32	115	-0.1596	4.515e-06	1.15476e-05	-0.1402	5.87e-05	0.000132153	-0.1499	9.487e-06	2.17019e-05	-0.01946	0.2395	0.245743	SiteClass[FBgn0004666|sim|INTRON|0],TranscriptAnnot[INTRON(MODIFIER||||664|sim|protein_coding|CODING|FBtr0082711|1);INTRON(MODIFIER||||672|sim|protein_coding|CODING|FBtr0334614|1);UPSTREAM(MODIFIER||||675|sim|protein_coding|CODING|FBtr0334613|)]	-
2L_13403948_SNP	T	G	G	0.1863	30	131	-0.1564	9.283e-06	1.1554e-05	-0.1343	0.0001431	0.000453198	-0.1454	2.313e-05	4.47708e-05	-0.02215	0.1742	0.191813	SiteClass[FBgn0032521|CG7110|INTRON|0],TranscriptAnnot[INTRON(MODIFIER||||825|CG7110|protein_coding|CODING|FBtr0080500|4)]	(TF_binding_site|mE1_TFBS_inv|FBsf0000234914)
3R_9069896_SNP	T	C	C	0.42	63	87	-0.1302	8.939e-06	1.17677e-05	-0.1164	6.239e-05	0.000248551	-0.1233	1.415e-05	3.16165e-05	-0.01375	0.3093	0.322019	SiteClass[FBgn0000024|Ace|INTRON|0],TranscriptAnnot[INTRON(MODIFIER||||636|Ace|protein_coding|CODING|FBtr0335223|3);INTRON(MODIFIER||||649|Ace|protein_coding|CODING|FBtr0082780|3);INTRON(MODIFIER||||649|Ace|protein_coding|CODING|FBtr0300486|4)]	-
2L_4356559_SNP	C	G	C	0.1325	22	144	-0.183	4.134e-06	1.18291e-05	-0.161	6.17e-05	0.00016144	-0.172	9.432e-06	2.46509e-05	-0.022	0.2452	0.251956	SiteClass[|||],TranscriptAnnot[INTERGENIC(MODIFIER|||||||||)]	-
3R_8810911_SNP	G	T	T	0.3733	56	94	-0.1309	1.029e-05	3.65034e-05	-0.1374	2.517e-06	1.44372e-05	-0.1342	2.96e-06	1.18613e-05	0.006446	0.6208	0.649588	SiteClass[FBgn0038100|Paip2|DOWNSTREAM|612;FBgn0051342|CG31342|UPSTREAM|852],TranscriptAnnot[DOWNSTREAM(MODIFIER||||124|Paip2|protein_coding|CODING|FBtr0334509|);UPSTREAM(MODIFIER||||823|CG31342|protein_coding|CODING|FBtr0113404|);UPSTREAM(MODIFIER||||994|CG31342|protein_coding|CODING|FBtr0113403|);UTR_3_PRIME(MODIFIER||||124|Paip2|protein_coding|CODING|FBtr0082693|4)]	-
3R_15185393_SNP	A	G	G	0.487	75	79	0.1288	5.778e-06	1.51298e-05	0.1237	1.466e-05	4.42413e-05	0.1263	4.823e-06	1.34627e-05	0.005063	0.7158	0.708648	SiteClass[|||],TranscriptAnnot[INTERGENIC(MODIFIER|||||||||)]	(TF_binding_site|BDTNP1_TFBS_da|FBsf0000329827),(TF_binding_site|BDTNP1_TFBS_dl|FBsf0000312820),(TF_binding_site|BDTNP1_TFBS_Med|FBsf0000285909),(TF_binding_site|BDTNP1_TFBS_prd|FBsf0000276679),(TF_binding_site|BDTNP1_TFBS_slp1|FBsf0000273093),(TF_binding_site|BDTNP1_TFBS_twi|FBsf0000265483),(TF_binding_site|mE1_TFBS_HSA|FBsf0000373163)
3R_8887715_SNP	A	T	T	0.2083	30	114	-0.1634	4.205e-06	1.39435e-05	-0.1497	2.83e-05	6.8706e-05	-0.1565	5.868e-06	1.64785e-05	-0.01367	0.4333	0.427777	SiteClass[FBgn0004666|sim|INTRON|0],TranscriptAnnot[INTRON(MODIFIER||||664|sim|protein_coding|CODING|FBtr0082711|1);INTRON(MODIFIER||||672|sim|protein_coding|CODING|FBtr0334614|1);UPSTREAM(MODIFIER||||675|sim|protein_coding|CODING|FBtr0334613|)]	-
2L_4356560_INS	T	TTTACTG	T	0.1325	22	144	-0.1816	5.131e-06	1.42854e-05	-0.1616	5.877e-05	0.00015273	-0.1716	9.955e-06	2.62343e-05	-0.01996	0.3022	0.298978	SiteClass[|||],TranscriptAnnot[INTERGENIC(MODIFIER|||||||||)]	-
3R_11770449_SNP	A	G	G	0.142	23	139	-0.1758	8.807e-06	1.43176e-05	-0.1559	7.946e-05	0.000193358	-0.1659	1.52e-05	3.00882e-05	-0.01984	0.3028	0.293658	SiteClass[FBgn0013334|Sap47|INTRON|0],TranscriptAnnot[INTRON(MODIFIER||||344|Sap47|protein_coding|CODING|FBtr0310672|2);INTRON(MODIFIER||||347|Sap47|protein_coding|CODING|FBtr0301655|1);INTRON(MODIFIER||||351|Sap47|protein_coding|CODING|FBtr0083209|1);INTRON(MODIFIER||||374|Sap47|protein_coding|CODING|FBtr0083205|1);INTRON(MODIFIER||||535|Sap47|protein_coding|CODING|FBtr0083210|2);INTRON(MODIFIER…	-
2L_15915751_SNP	A	T	T	0.1795	28	128	-0.003991	0.9153	0.873976	-0.07797	0.03784	0.05632	-0.04098	0.2629	0.370327	0.07398	9.234e-06	1.45412e-05	SiteClass[FBgn0028645|beat-Ib|INTRON|0],TranscriptAnnot[INTRON(MODIFIER||||327|beat-Ib|protein_coding|CODING|FBtr0080808|2);INTRON(MODIFIER||||327|beat-Ib|protein_coding|CODING|FBtr0300615|2)]	-
3R_8813775_SNP	T	A	A	0.4481	69	85	-0.1203	2.52e-05	3.84036e-05	-0.1299	4.516e-06	2.03984e-05	-0.1251	5.725e-06	1.461e-05	0.009566	0.4912	0.482234	SiteClass[FBgn0051342|CG31342|INTRON|0;FBgn0038102|CG14383|NON_SYNONYMOUS_CODING|0],TranscriptAnnot[INTRON(MODIFIER||||823|CG31342|protein_coding|CODING|FBtr0113404|4);INTRON(MODIFIER||||994|CG31342|protein_coding|CODING|FBtr0113403|4);NON_SYNONYMOUS_CODING(MODERATE|MISSENSE|aTg/aAg|M149K|332|CG14383|protein_coding|CODING|FBtr0082724|)]	(TF_binding_site|mE1_TFBS_cad|FBsf0000248237),(TF_binding_site|mE1_TFBS_HSA|FBsf0000371094),(TF_binding_site|mE1_TFBS_sens|FBsf0000231509)
3R_13837961_SNP	T	A	T	0.2581	40	115	-0.1461	4.852e-06	1.47517e-05	-0.1376	2.184e-05	9.10446e-05	-0.1419	5.441e-06	1.98662e-05	-0.008497	0.5919	0.581735	SiteClass[FBgn0263995|cpo|INTRON|0],TranscriptAnnot[INTRON(MODIFIER||||606|cpo|protein_coding|CODING|FBtr0330269|11);INTRON(MODIFIER||||606|cpo|protein_coding|CODING|FBtr0330276|10);INTRON(MODIFIER||||606|cpo|protein_coding|CODING|FBtr0330278|9);INTRON(MODIFIER||||606|cpo|protein_coding|CODING|FBtr0330279|11);INTRON(MODIFIER||||606|cpo|protein_coding|CODING|FBtr0330280|11);INTRON(MODIFIER||||607|…	-
3R_13030031_SNP	G	A	A	0.2642	42	117	-0.128	5.423e-05	0.000359679	-0.1485	2.053e-06	1.49887e-05	-0.1382	6.033e-06	4.47797e-05	0.02053	0.1793	0.173475	SiteClass[|||],TranscriptAnnot[INTERGENIC(MODIFIER|||||||||)]	-
2L_4116533_SNP	T	C	C	0.3007	46	107	-0.1314	1.537e-05	7.32114e-05	-0.1397	4.037e-06	1.5395e-05	-0.1355	4.302e-06	1.8073e-05	0.008256	0.5644	0.577334	SiteClass[FBgn0000547|ed|DOWNSTREAM|784],TranscriptAnnot[DOWNSTREAM(MODIFIER||||1332|ed|protein_coding|CODING|FBtr0334265|);INTERGENIC(MODIFIER|||||||||)]	(TF_binding_site|BDTNP1_TFBS_da|FBsf0000321360),(TF_binding_site|mE1_TFBS_cad|FBsf0000241299),(TF_binding_site|mE1_TFBS_HSA|FBsf0000345181)
2L_4356594_SNP	C	T	C	0.1333	22	143	-0.1809	5.821e-06	1.57579e-05	-0.1603	6.827e-05	0.000178589	-0.1706	1.148e-05	3.01459e-05	-0.02063	0.2883	0.283175	SiteClass[|||],TranscriptAnnot[INTERGENIC(MODIFIER|||||||||)]	-
3R_5636504_SNP	C	T	T	0.06587	11	156	-0.2424	8.886e-06	1.65218e-05	-0.2082	0.0001491	0.000260825	-0.2253	2.205e-05	3.84306e-05	-0.03426	0.1963	0.190353	SiteClass[FBgn0264827|CR44035|EXON|0],TranscriptAnnot[EXON(MODIFIER|||||CR44035|ncRNA|NON_CODING|FBtr0334683|2)]	-
3R_9105937_SNP	T	A	A	0.2089	33	125	-0.1539	5.414e-06	1.71109e-05	-0.1478	1.376e-05	7.06758e-05	-0.1509	4.373e-06	1.8601e-05	-0.006176	0.7149	0.707346	SiteClass[FBgn0038130|CG8630|INTRON|0],TranscriptAnnot[INTRON(MODIFIER||||408|CG8630|protein_coding|CODING|FBtr0082737|1)]	-
3L_4288628_SNP	G	A	G	0.2229	35	122	-0.1362	5.234e-05	0.000195042	-0.1497	7.385e-06	1.80576e-05	-0.1429	1.08e-05	3.42573e-05	0.01349	0.4174	0.402079	SiteClass[FBgn0041630|Hexo1|UPSTREAM|13;FBgn0015829|TfIIEbeta|DOWNSTREAM|279],TranscriptAnnot[DOWNSTREAM(MODIFIER||||249|TfIIEbeta|protein_coding|CODING|FBtr0300449|);DOWNSTREAM(MODIFIER||||292|TfIIEbeta|protein_coding|CODING|FBtr0073234|);INTERGENIC(MODIFIER|||||||||);UPSTREAM(MODIFIER||||606|Hexo1|protein_coding|CODING|FBtr0073237|);UPSTREAM(MODIFIER||||606|Hexo1|protein_coding|CODING|FBtr03007…	(TF_binding_site|mE1_TFBS_HSA|FBsf0000362094),(TF_binding_site|mE1_TFBS_Trl|FBsf0000339505)
3R_8735704_SNP	A	T	T	0.3427	49	94	-0.1324	1.579e-05	4.47888e-05	-0.138	5.046e-06	2.7345e-05	-0.1352	4.604e-06	1.8536e-05	0.005603	0.7102	0.705202	SiteClass[FBgn0038090|CG10909|DOWNSTREAM|138],TranscriptAnnot[DOWNSTREAM(MODIFIER||||349|CG10909|protein_coding|CODING|FBtr0082685|);INTERGENIC(MODIFIER|||||||||)]	-
2R_10525942_SNP	T	A	A	0.05556	9	153	-0.1864	0.001958	0.00315864	-0.2625	7.94e-06	1.87376e-05	-0.2244	0.0001019	0.0001913	0.07611	0.007538	0.00764627	SiteClass[FBgn0262881|CG43236|UPSTREAM|121;FBgn0261632|CG42715|UPSTREAM|768],TranscriptAnnot[INTERGENIC(MODIFIER|||||||||);UPSTREAM(MODIFIER||||134|CG42715|protein_coding|CODING|FBtr0302997|);UPSTREAM(MODIFIER||||50|CG43236|protein_coding|CODING|FBtr0306289|)]	-
3R_8736965_DEL	T	TT	TT	0.226	33	113	-0.1469	1.404e-05	5.49322e-05	-0.1534	6.399e-06	2.31001e-05	-0.1502	4.899e-06	1.89807e-05	0.006509	0.6967	0.69551	SiteClass[FBgn0038090|CG10909|UTR_5_PRIME|0],TranscriptAnnot[UTR_5_PRIME(MODIFIER||||349|CG10909|protein_coding|CODING|FBtr0082685|1)]	-
2R_19126679_SNP	T	A	A	0.3537	58	106	0.1048	0.0002077	0.000221805	0.1245	9.351e-06	1.9905e-05	0.1146	2.671e-05	3.87321e-05	-0.01967	0.1578	0.150719	SiteClass[|||],TranscriptAnnot[INTERGENIC(MODIFIER|||||||||)]	-
3R_9033508_SNP	C	A	C	0.4052	62	91	0.1358	2.868e-06	2.02505e-05	0.1141	8.43e-05	0.000399162	0.125	9.698e-06	5.44857e-05	0.02169	0.1032	0.115887	SiteClass[FBgn0038126|CG8483|DOWNSTREAM|968],TranscriptAnnot[DOWNSTREAM(MODIFIER||||392|CG8483|protein_coding|CODING|FBtr0082782|);INTERGENIC(MODIFIER|||||||||)]	-
3R_8936092_SNP	C	G	G	0.179	29	133	-0.1549	1.508e-05	5.32941e-05	-0.1579	1.023e-05	2.70777e-05	-0.1564	6.648e-06	2.02807e-05	0.002996	0.863	0.861952	SiteClass[FBgn0038118|timeout|INTRON|0],TranscriptAnnot[INTRON(MODIFIER||||1384|timeout|protein_coding|CODING|FBtr0082712|10)]	-
3R_12506579_SNP	A	C	C	0.3007	46	107	-0.1291	3.037e-05	0.00021379	-0.1432	3.191e-06	2.04015e-05	-0.1361	5.362e-06	3.83811e-05	0.01412	0.3462	0.34016	SiteClass[FBgn0003944|Ubx|INTRON|0],TranscriptAnnot[INTRON(MODIFIER||||346|Ubx|protein_coding|CODING|FBtr0083348|1);INTRON(MODIFIER||||355|Ubx|protein_coding|CODING|FBtr0083352|1);INTRON(MODIFIER||||363|Ubx|protein_coding|CODING|FBtr0083350|2);INTRON(MODIFIER||||372|Ubx|protein_coding|CODING|FBtr0083349|2);INTRON(MODIFIER||||380|Ubx|protein_coding|CODING|FBtr0083351|3);INTRON(MODIFIER||||389|Ubx|…	(TF_binding_site|mE1_TFBS_cad|FBsf0000248546)
3R_8948299_SNP	T	A	T	0.4467	67	83	-0.1333	2.734e-06	2.06149e-05	-0.1102	0.0001021	0.00119728	-0.1217	9.771e-06	0.000106366	-0.02311	0.09555	0.0927927	SiteClass[FBgn0038118|timeout|INTRON|0;FBgn0260793|2mit|UTR_3_PRIME|0],TranscriptAnnot[INTRON(MODIFIER||||1384|timeout|protein_coding|CODING|FBtr0082712|11);UTR_3_PRIME(MODIFIER||||1141|2mit|protein_coding|CODING|FBtr0301436|4);UTR_3_PRIME(MODIFIER||||1155|2mit|protein_coding|CODING|FBtr0330143|4)]	-
3R_9027604_SNP	G	T	G	0.2113	30	112	0.1622	5.995e-06	2.15346e-05	0.1269	0.0004805	0.00354436	0.1446	3.528e-05	0.000215174	0.03533	0.05012	0.0396709	SiteClass[|||],TranscriptAnnot[INTERGENIC(MODIFIER|||||||||)]	-
3R_13855044_SNP	C	G	C	0.4744	74	82	-0.1232	1.142e-05	4.5702e-05	-0.1242	9.313e-06	3.61658e-05	-0.1237	5.347e-06	2.17221e-05	0.0009503	0.9451	0.943798	SiteClass[|||],TranscriptAnnot[INTERGENIC(MODIFIER|||||||||)]	-
3R_9033512_SNP	G	C	G	0.4172	63	88	0.1347	3.128e-06	2.27438e-05	0.1136	8.185e-05	0.000421591	0.1242	9.785e-06	5.95551e-05	0.02108	0.116	0.127307	SiteClass[FBgn0038126|CG8483|DOWNSTREAM|964],TranscriptAnnot[DOWNSTREAM(MODIFIER||||392|CG8483|protein_coding|CODING|FBtr0082782|);INTERGENIC(MODIFIER|||||||||)]	-
3R_13030039_SNP	A	G	G	0.25	39	117	-0.1385	2.381e-05	0.000132175	-0.1494	3.336e-06	2.41047e-05	-0.1439	5.063e-06	3.16884e-05	0.01094	0.4716	0.481089	SiteClass[|||],TranscriptAnnot[INTERGENIC(MODIFIER|||||||||)]	-
3R_9039848_SNP	T	C	T	0.457	69	82	0.1262	9.379e-06	2.41657e-05	0.1124	7.819e-05	0.00019016	0.1193	1.505e-05	3.87307e-05	0.0138	0.332	0.314232	SiteClass[FBgn0038126|CG8483|NON_SYNONYMOUS_CODING|0],TranscriptAnnot[NON_SYNONYMOUS_CODING(MODERATE|MISSENSE|gAa/gGa|E18G|392|CG8483|protein_coding|CODING|FBtr0082782|)]	(TF_binding_site|BDTNP1_TFBS_dl|FBsf0000311411),(TF_binding_site|BDTNP1_TFBS_Med|FBsf0000285179)
3R_8887712_INS	TTGGGACCCC	T	T	0.2162	32	116	-0.1549	7.486e-06	2.45015e-05	-0.1397	5.672e-05	0.000157876	-0.1473	1.159e-05	3.50932e-05	-0.0152	0.3688	0.364651	SiteClass[FBgn0004666|sim|INTRON|0],TranscriptAnnot[INTRON(MODIFIER||||664|sim|protein_coding|CODING|FBtr0082711|1);INTRON(MODIFIER||||672|sim|protein_coding|CODING|FBtr0334614|1);UPSTREAM(MODIFIER||||675|sim|protein_coding|CODING|FBtr0334613|)]	-
3R_8980896_SNP	T	G	T	0.1795	28	128	-0.1638	8.398e-06	2.48827e-05	-0.1467	7.221e-05	0.000695052	-0.1553	1.425e-05	8.36575e-05	-0.01704	0.3392	0.330709	SiteClass[FBgn0038118|timeout|INTRON|0;FBgn0260793|2mit|INTRON|0],TranscriptAnnot[INTRON(MODIFIER||||1141|2mit|protein_coding|CODING|FBtr0301436|1);INTRON(MODIFIER||||1155|2mit|protein_coding|CODING|FBtr0330143|1);INTRON(MODIFIER||||1384|timeout|protein_coding|CODING|FBtr0082712|11)]	-
3R_9111166_SNP	A	C	C	0.1076	17	141	-0.2005	8.479e-06	2.49084e-05	-0.1608	0.0004252	0.0012582	-0.1807	4.295e-05	0.000119857	-0.03968	0.05294	0.0646477	SiteClass[FBgn0038131|CG15888|NON_SYNONYMOUS_CODING|0;FBgn0038130|CG8630|DOWNSTREAM|917],TranscriptAnnot[DOWNSTREAM(MODIFIER||||408|CG8630|protein_coding|CODING|FBtr0082737|);NON_SYNONYMOUS_CODING(MODERATE|MISSENSE|atG/atT|M188I|319|CG15888|protein_coding|CODING|FBtr0100257|)]	-
3R_9033505_SNP	G	A	G	0.4067	61	89	0.1353	4.167e-06	2.72788e-05	0.1126	0.0001333	0.000429064	0.1239	1.533e-05	6.57869e-05	0.02268	0.08963	0.10324	SiteClass[FBgn0038126|CG8483|DOWNSTREAM|971],TranscriptAnnot[DOWNSTREAM(MODIFIER||||392|CG8483|protein_coding|CODING|FBtr0082782|);INTERGENIC(MODIFIER|||||||||)]	-
3R_9048664_SNP	C	A	A	0.4258	66	89	-0.1313	3.073e-06	2.7472e-05	-0.1207	1.766e-05	0.000235078	-0.126	3.681e-06	4.66264e-05	-0.01064	0.4529	0.435694	SiteClass[FBgn0000024|Ace|DOWNSTREAM|9],TranscriptAnnot[DOWNSTREAM(MODIFIER||||636|Ace|protein_coding|CODING|FBtr0335223|);INTERGENIC(MODIFIER|||||||||)]	-
3R_9290391_SNP	C	T	T	0.4667	70	80	-0.1304	8.608e-06	2.76886e-05	-0.1153	7.674e-05	0.000560992	-0.1228	1.493e-05	7.75734e-05	-0.01503	0.2851	0.273793	SiteClass[FBgn0040554|CR17025|INTRON|0;FBgn0262323|mir-252|UPSTREAM|358;FBgn0038156|CG14372|DOWNSTREAM|485],TranscriptAnnot[DOWNSTREAM(MODIFIER||||1001|CG14372|protein_coding|CODING|FBtr0303259|);DOWNSTREAM(MODIFIER||||1001|CG14372|protein_coding|CODING|FBtr0309090|);INTRON(MODIFIER|||||CR17025|ncRNA|NON_CODING|FBtr0309273|1);UPSTREAM(MODIFIER|||||mir-252|miRNA|NON_CODING|FBtr0304494|);UPSTREAM(M…	-
2L_9072139_SNP	T	C	T	0.2133	32	118	-0.1188	0.000788	0.000979073	-0.1529	6.771e-06	2.83588e-05	-0.1358	5.935e-05	0.000110907	0.03417	0.02553	0.0401519	SiteClass[FBgn0051708|CG31708|UPSTREAM|977],TranscriptAnnot[INTERGENIC(MODIFIER|||||||||);UPSTREAM(MODIFIER||||512|CG31708|protein_coding|CODING|FBtr0303881|);UPSTREAM(MODIFIER||||532|CG31708|protein_coding|CODING|FBtr0079776|);UPSTREAM(MODIFIER||||532|CG31708|protein_coding|CODING|FBtr0079777|)]	-
3R_9836488_SNP	A	C	A	0.2614	40	113	-0.1467	5.853e-06	2.89522e-05	-0.1328	3.811e-05	0.00014812	-0.1398	7.994e-06	3.68581e-05	-0.01391	0.3856	0.36786	SiteClass[FBgn0264493|rdx|INTRON|0],TranscriptAnnot[INTRON(MODIFIER||||374|rdx|protein_coding|CODING|FBtr0301633|2);INTRON(MODIFIER||||403|rdx|protein_coding|CODING|FBtr0301634|2)]	-
3R_8813896_SNP	C	A	A	0.4295	64	85	-0.1191	4.51e-05	8.1088e-05	-0.13	7.578e-06	3.63706e-05	-0.1246	1.021e-05	2.97955e-05	0.01094	0.4437	0.431195	SiteClass[FBgn0051342|CG31342|INTRON|0;FBgn0038102|CG14383|NON_SYNONYMOUS_CODING|0],TranscriptAnnot[INTRON(MODIFIER||||823|CG31342|protein_coding|CODING|FBtr0113404|4);INTRON(MODIFIER||||994|CG31342|protein_coding|CODING|FBtr0113403|4);NON_SYNONYMOUS_CODING(MODERATE|MISSENSE|Tgc/Ggc|C109G|332|CG14383|protein_coding|CODING|FBtr0082724|)]	(TF_binding_site|mE1_TFBS_cad|FBsf0000248237),(TF_binding_site|mE1_TFBS_HSA|FBsf0000371094),(TF_binding_site|mE1_TFBS_sens|FBsf0000231509)
3R_9755280_SNP	C	A	A	0.4028	58	86	-0.1383	2.234e-06	3.05624e-05	-0.09969	0.0007293	0.00952273	-0.119	2.912e-05	0.000483189	-0.03859	0.00771	0.00630433	SiteClass[|||],TranscriptAnnot[INTERGENIC(MODIFIER|||||||||)]	-
2L_289202_SNP	G	A	A	0.1037	17	147	-0.1173	0.01063	0.00752302	-0.02985	0.512	0.473622	-0.0736	0.09975	0.0805831	-0.0875	4.736e-06	3.07494e-05	SiteClass[FBgn0031245|CG3625|INTRON|0;FBgn0025686|CG11592|UPSTREAM|58],TranscriptAnnot[INTRON(MODIFIER||||145|CG3625|protein_coding|CODING|FBtr0308693|2);INTRON(MODIFIER||||247|CG3625|protein_coding|CODING|FBtr0113009|2);UPSTREAM(MODIFIER||||505|CG11592|protein_coding|CODING|FBtr0078134|);UPSTREAM(MODIFIER||||505|CG11592|protein_coding|CODING|FBtr0330647|)]	-
3R_9033460_SNP	A	C	A	0.4	62	93	0.1324	4.333e-06	3.17269e-05	0.1146	6.741e-05	0.000316988	0.1235	9.596e-06	5.94841e-05	0.01784	0.2073	0.194494	SiteClass[|||],TranscriptAnnot[INTERGENIC(MODIFIER|||||||||)]	-
3R_9158394_SNP	T	C	C	0.2157	33	120	-0.1521	9.482e-06	3.31004e-05	-0.135	7.758e-05	0.000586426	-0.1435	1.549e-05	8.68745e-05	-0.01716	0.3047	0.298298	SiteClass[FBgn0038139|CG8795|INTRON|0],TranscriptAnnot[INTRON(MODIFIER||||599|CG8795|protein_coding|CODING|FBtr0082774|2);UTR_5_PRIME(MODIFIER||||599|CG8795|protein_coding|CODING|FBtr0082773|2)]	(TF_binding_site|mE1_TFBS_HSA|FBsf0000371183),(TF_binding_site|mE1_TFBS_sbb|FBsf0000250855)
3R_9836484_SNP	G	T	G	0.2649	40	111	-0.1448	7.773e-06	4.46364e-05	-0.1364	1.938e-05	8.41562e-05	-0.1406	6.738e-06	3.37585e-05	-0.008391	0.5835	0.588182	SiteClass[FBgn0264493|rdx|INTRON|0],TranscriptAnnot[INTRON(MODIFIER||||374|rdx|protein_coding|CODING|FBtr0301633|2);INTRON(MODIFIER||||403|rdx|protein_coding|CODING|FBtr0301634|2)]	-
2R_1840027_DEL	CAGTGCAC	C	CAGTGCAC	0.1895	29	124	0.05155	0.165	0.0648781	-0.01844	0.6212	0.848668	0.01655	0.6496	0.392638	0.06998	4.242e-06	3.49705e-05	SiteClass[|||],TranscriptAnnot[INTERGENIC(MODIFIER|||||||||)]	-
3R_10219948_SNP	A	G	A	0.4013	63	94	-0.1283	8.853e-06	3.50726e-05	-0.1124	9.752e-05	0.000214841	-0.1203	1.728e-05	5.01148e-05	-0.01593	0.2528	0.243599	SiteClass[FBgn0086901|cv-c|SYNONYMOUS_CODING|0],TranscriptAnnot[SYNONYMOUS_CODING(LOW|SILENT|gtT/gtC|V1962|2351|cv-c|protein_coding|CODING|FBtr0112630|);SYNONYMOUS_CODING(LOW|SILENT|gtT/gtC|V1962|2351|cv-c|protein_coding|CODING|FBtr0112632|);SYNONYMOUS_CODING(LOW|SILENT|gtT/gtC|V628|1017|cv-c|protein_coding|CODING|FBtr0112631|)]	(TF_binding_site|mE1_TFBS_cad|FBsf0000248344)
X_2513884_SNP	G	A	A	0.05325	9	160	-0.2178	0.0002967	0.00111967	-0.2652	8.204e-06	3.57867e-05	-0.2415	3.19e-05	0.000134336	0.04737	0.1012	0.0986865	SiteClass[FBgn0040336|Seipin|UTR_5_PRIME|0;FBgn0040334|Tsp3A|UPSTREAM|113],TranscriptAnnot[UPSTREAM(MODIFIER||||304|Tsp3A|protein_coding|CODING|FBtr0070445|);UPSTREAM(MODIFIER||||304|Tsp3A|protein_coding|CODING|FBtr0307159|);UTR_5_PRIME(MODIFIER||||370|Seipin|protein_coding|CODING|FBtr0070442|1)]	(TF_binding_site|BDTNP1_TFBS_da|FBsf0000331475),(TF_binding_site|BDTNP1_TFBS_dl|FBsf0000316127),(TF_binding_site|BDTNP1_TFBS_twi|FBsf0000204920),(TF_binding_site|mE1_TFBS_cad|FBsf0000242766),(TF_binding_site|mE1_TFBS_disco|FBsf0000261246),(TF_binding_site|mE1_TFBS_h|FBsf0000257753),(TF_binding_site|mE1_TFBS_HSA|FBsf0000378618),(TF_binding_site|mE1_TFBS_sens|FBsf0000219325)
2R_15670779_SNP	G	A	A	0.4214	67	92	0.122	8.546e-06	3.585e-05	0.1023	0.0002427	0.000834991	0.1122	2.795e-05	0.000111314	0.01962	0.1552	0.144847	SiteClass[FBgn0034474|Obp56g|DOWNSTREAM|210],TranscriptAnnot[DOWNSTREAM(MODIFIER||||131|Obp56g|protein_coding|CODING|FBtr0086342|);DOWNSTREAM(MODIFIER||||132|Obp56g|protein_coding|CODING|FBtr0086343|);INTERGENIC(MODIFIER|||||||||)]	-
3R_9121156_SNP	T	C	C	0.3097	48	107	-0.1342	1.177e-05	6.36403e-05	-0.138	4.898e-06	6.88181e-05	-0.1361	3.945e-06	3.65691e-05	0.003754	0.8003	0.797112	SiteClass[FBgn0038135|CG8773|SYNONYMOUS_CODING|0],TranscriptAnnot[SYNONYMOUS_CODING(LOW|SILENT|caC/caT|H215|994|CG8773|protein_coding|CODING|FBtr0290037|)]	(TF_binding_site|BDTNP1_TFBS_dl|FBsf0000311421),(TF_binding_site|BDTNP1_TFBS_twi|FBsf0000264862),(TF_binding_site|mE1_TFBS_HSA|FBsf0000371174),(TF_binding_site|mE1_TFBS_sens|FBsf0000231541)
3R_9195213_SNP	A	G	G	0.1875	30	130	-0.1573	8.876e-06	3.74271e-05	-0.1392	9.761e-05	0.000749369	-0.1482	1.766e-05	0.000106591	-0.0181	0.2864	0.286952	SiteClass[FBgn0038142|CheA87a|UPSTREAM|157;FBgn0027610|Dic1|DOWNSTREAM|400;FBgn0023495|Lip3|DOWNSTREAM|749],TranscriptAnnot[DOWNSTREAM(MODIFIER||||280|Dic1|protein_coding|CODING|FBtr0082747|);DOWNSTREAM(MODIFIER||||280|Dic1|protein_coding|CODING|FBtr0082748|);DOWNSTREAM(MODIFIER||||394|Lip3|protein_coding|CODING|FBtr0082771|);INTERGENIC(MODIFIER|||||||||);UPSTREAM(MODIFIER||||183|CheA87a|protein_…	-
3R_8810060_SNP	T	C	C	0.3766	58	96	-0.1244	1.238e-05	0.00010268	-0.1311	2.907e-06	4.42346e-05	-0.1278	3.213e-06	3.75737e-05	0.006708	0.6179	0.631257	SiteClass[FBgn0038100|Paip2|UTR_3_PRIME|0],TranscriptAnnot[UTR_3_PRIME(MODIFIER||||124|Paip2|protein_coding|CODING|FBtr0082693|4);UTR_3_PRIME(MODIFIER||||124|Paip2|protein_coding|CODING|FBtr0334509|5)]	-
3R_9197015_SNP	A	G	A	0.1166	19	144	-0.19	8.192e-06	3.76428e-05	-0.1599	0.0001935	0.000631302	-0.1749	2.43e-05	9.66108e-05	-0.03008	0.151	0.141366	SiteClass[FBgn0023495|Lip3|SYNONYMOUS_CODING|0;FBgn0038142|CheA87a|DOWNSTREAM|947],TranscriptAnnot[DOWNSTREAM(MODIFIER||||183|CheA87a|protein_coding|CODING|FBtr0082749|);SYNONYMOUS_CODING(LOW|SILENT|gaT/gaC|D100|394|Lip3|protein_coding|CODING|FBtr0082771|)]	-
3R_9755290_SNP	T	A	A	0.4069	59	86	-0.137	2.223e-06	3.85923e-05	-0.09904	0.0006977	0.0104336	-0.118	2.818e-05	0.000568605	-0.03798	0.008188	0.00691211	SiteClass[|||],TranscriptAnnot[INTERGENIC(MODIFIER|||||||||)]	-
3R_12145518_SNP	T	G	T	0.4295	67	89	-0.1218	1.875e-05	0.000123597	-0.1285	4.534e-06	4.13884e-05	-0.1251	4.726e-06	4.02276e-05	0.006729	0.6339	0.620565	SiteClass[FBgn0040271|Sulf1|INTRON|0],TranscriptAnnot[INTRON(MODIFIER||||1114|Sulf1|protein_coding|CODING|FBtr0083273|2);INTRON(MODIFIER||||1114|Sulf1|protein_coding|CODING|FBtr0334699|3);INTRON(MODIFIER||||1114|Sulf1|protein_coding|CODING|FBtr0334700|2)]	-
3L_5506946_SNP	C	T	T	0.2222	36	126	-0.1126	0.0007302	0.0028181	-0.148	5.794e-06	4.11776e-05	-0.1303	4.729e-05	0.000253754	0.03533	0.02589	0.0250689	SiteClass[FBgn0035610|Lkr|SYNONYMOUS_CODING|0],TranscriptAnnot[SYNONYMOUS_CODING(LOW|SILENT|aaA/aaG|K324|542|Lkr|protein_coding|CODING|FBtr0077149|)]	-
3L_5219239_SNP	G	C	C	0.3395	55	107	-0.1293	7.956e-06	4.28301e-05	-0.1066	0.0002661	0.00130327	-0.118	2.917e-05	0.000158319	-0.02269	0.1092	0.102509	SiteClass[FBgn0052423|shep|INTRON|0],TranscriptAnnot[INTRON(MODIFIER||||499|shep|protein_coding|CODING|FBtr0077173|1);INTRON(MODIFIER||||499|shep|protein_coding|CODING|FBtr0077174|2);INTRON(MODIFIER||||578|shep|protein_coding|CODING|FBtr0077172|2);INTRON(MODIFIER||||590|shep|protein_coding|CODING|FBtr0308859|2)]	-
3R_9836605_SNP	A	C	A	0.2885	45	111	-0.1369	7.511e-06	4.38579e-05	-0.1254	3.928e-05	0.000149335	-0.1312	9.091e-06	4.58376e-05	-0.01152	0.4525	0.437688	SiteClass[FBgn0264493|rdx|INTRON|0],TranscriptAnnot[INTRON(MODIFIER||||374|rdx|protein_coding|CODING|FBtr0301633|2);INTRON(MODIFIER||||403|rdx|protein_coding|CODING|FBtr0301634|2)]	-
3R_8955023_SNP	T	G	T	0.1595	26	137	-0.1683	5.466e-06	4.56418e-05	-0.125	0.0007428	0.00493833	-0.1467	4.441e-05	0.000373735	-0.04333	0.01675	0.0150708	SiteClass[FBgn0038118|timeout|INTRON|0;FBgn0260793|2mit|INTRON|0],TranscriptAnnot[INTRON(MODIFIER||||1141|2mit|protein_coding|CODING|FBtr0301436|3);INTRON(MODIFIER||||1155|2mit|protein_coding|CODING|FBtr0330143|3);INTRON(MODIFIER||||1384|timeout|protein_coding|CODING|FBtr0082712|11)]	(TF_binding_site|BDTNP1_TFBS_da|FBsf0000329057)
3L_15089120_SNP	G	T	T	0.2593	42	120	-0.1187	0.0001541	0.000521856	-0.14	6.226e-06	4.80853e-05	-0.1294	1.848e-05	9.84289e-05	0.02129	0.1681	0.156586	SiteClass[FBgn0027088|Aats-gly|SYNONYMOUS_CODING|0],TranscriptAnnot[SYNONYMOUS_CODING(LOW|SILENT|gcT/gcG|A167|679|Aats-gly|protein_coding|CODING|FBtr0075632|);SYNONYMOUS_CODING(LOW|SILENT|gcT/gcG|A253|765|Aats-gly|protein_coding|CODING|FBtr0075633|);SYNONYMOUS_CODING(LOW|SILENT|gcT/gcG|A253|765|Aats-gly|protein_coding|CODING|FBtr0333934|)]	(TF_binding_site|mE1_TFBS_HSA|FBsf0000365399),(TF_binding_site|mE1_TFBS_sens|FBsf0000224543)
2R_16168775_SNP	C	A	C	0.3287	47	96	-0.1401	7.128e-06	4.86347e-05	-0.1185	0.0001401	0.0014105	-0.1293	1.908e-05	0.000176438	-0.02157	0.151	0.148212	SiteClass[FBgn0034497|CG9090|UPSTREAM|146;FBgn0034498|CG16868|DOWNSTREAM|359],TranscriptAnnot[DOWNSTREAM(MODIFIER||||1449|CG16868|protein_coding|CODING|FBtr0086302|);INTERGENIC(MODIFIER|||||||||);UPSTREAM(MODIFIER||||374|CG9090|protein_coding|CODING|FBtr0086303|)]	-
3R_9033945_SNP	T	C	T	0.3987	61	92	0.1306	7.08e-06	4.87587e-05	0.1167	5.244e-05	0.000249582	0.1236	1.085e-05	6.44832e-05	0.01385	0.3232	0.317793	SiteClass[FBgn0038126|CG8483|DOWNSTREAM|531],TranscriptAnnot[DOWNSTREAM(MODIFIER||||392|CG8483|protein_coding|CODING|FBtr0082782|);INTERGENIC(MODIFIER|||||||||)]	(TF_binding_site|mE1_TFBS_Trl|FBsf0000340966)
3R_13036608_SNP	A	G	A	0.3533	53	97	-0.1129	0.0001964	0.000476271	-0.1308	7.837e-06	5.33556e-05	-0.1219	2.692e-05	9.82612e-05	0.01794	0.1827	0.210392	SiteClass[|||],TranscriptAnnot[INTERGENIC(MODIFIER|||||||||)]	-
3L_1365534_SNP	T	A	T	0.3758	62	103	-0.1179	2.612e-05	0.000120127	-0.1234	9.813e-06	7.51347e-05	-0.1207	8.643e-06	5.40092e-05	0.00547	0.6899	0.685552	SiteClass[FBgn0003138|Ptp61F|INTRON|0],TranscriptAnnot[INTRON(MODIFIER||||431|Ptp61F|protein_coding|CODING|FBtr0310161|3);INTRON(MODIFIER||||530|Ptp61F|protein_coding|CODING|FBtr0072716|1)]	(TF_binding_site|BDTNP1_TFBS_dl|FBsf0000304973)
2R_16168903_SNP	A	T	A	0.3049	50	114	-0.1336	6.574e-06	5.93852e-05	-0.1068	0.0003716	0.00301944	-0.1202	3.364e-05	0.000308863	-0.02687	0.05602	0.058195	SiteClass[FBgn0034498|CG16868|DOWNSTREAM|231;FBgn0034497|CG9090|UPSTREAM|274],TranscriptAnnot[DOWNSTREAM(MODIFIER||||1449|CG16868|protein_coding|CODING|FBtr0086302|);INTERGENIC(MODIFIER|||||||||);UPSTREAM(MODIFIER||||374|CG9090|protein_coding|CODING|FBtr0086303|)]	-
3R_14141471_SNP	G	A	A	0.3221	48	101	-0.1395	7.178e-06	5.96631e-05	-0.1139	0.0002743	0.00116901	-0.1267	2.941e-05	0.000173948	-0.02562	0.07936	0.0808112	SiteClass[|||],TranscriptAnnot[INTERGENIC(MODIFIER|||||||||)]	-
3R_9117821_SNP	C	T	T	0.2614	40	113	-0.1463	5.485e-06	6.70053e-05	-0.1173	0.0002915	0.00172637	-0.1318	2.555e-05	0.000232239	-0.02899	0.06565	0.0595458	SiteClass[FBgn0038134|wntD|UTR_3_PRIME|0;FBgn0038133|Osi22|DOWNSTREAM|253],TranscriptAnnot[DOWNSTREAM(MODIFIER||||332|Osi22|protein_coding|CODING|FBtr0082738|);UTR_3_PRIME(MODIFIER||||309|wntD|protein_coding|CODING|FBtr0082775|1)]	(TF_binding_site|BDTNP1_TFBS_da|FBsf0000329059),(TF_binding_site|mE1_TFBS_cad|FBsf0000248255),(TF_binding_site|mE1_TFBS_chinmo|FBsf0000212628),(TF_binding_site|mE1_TFBS_HSA|FBsf0000371172)
2R_10541246_SNP	C	T	C	0.4188	67	93	0.1121	6.432e-05	0.000495728	0.126	5.839e-06	6.97387e-05	0.1191	1.177e-05	0.000114868	-0.01392	0.281	0.300568	SiteClass[|||],TranscriptAnnot[INTERGENIC(MODIFIER|||||||||)]	-
3R_8816580_SNP	G	A	G	0.4423	69	87	0.1155	5.899e-05	0.000302209	0.1251	8.485e-06	7.04782e-05	0.1203	1.328e-05	8.71359e-05	-0.009558	0.4771	0.480317	SiteClass[FBgn0051342|CG31342|UTR_3_PRIME|0;FBgn0041710|yellow-f|DOWNSTREAM|591],TranscriptAnnot[DOWNSTREAM(MODIFIER||||413|yellow-f|protein_coding|CODING|FBtr0331427|);DOWNSTREAM(MODIFIER||||418|yellow-f|protein_coding|CODING|FBtr0331426|);DOWNSTREAM(MODIFIER||||429|yellow-f|protein_coding|CODING|FBtr0082723|);UTR_3_PRIME(MODIFIER||||823|CG31342|protein_coding|CODING|FBtr0113404|7);UTR_3_PRIME(M…	(TF_binding_site|mE1_TFBS_cad|FBsf0000248238)
2R_16168787_SNP	G	C	G	0.2805	46	118	-0.1343	9.506e-06	7.52587e-05	-0.1138	0.0001927	0.00129113	-0.1241	2.646e-05	0.000206475	-0.02053	0.1632	0.158826	SiteClass[FBgn0034497|CG9090|UPSTREAM|158;FBgn0034498|CG16868|DOWNSTREAM|347],TranscriptAnnot[DOWNSTREAM(MODIFIER||||1449|CG16868|protein_coding|CODING|FBtr0086302|);INTERGENIC(MODIFIER|||||||||);UPSTREAM(MODIFIER||||374|CG9090|protein_coding|CODING|FBtr0086303|)]	-
3R_9128977_SNP	T	G	G	0.3506	54	100	-0.1356	3.924e-06	7.55421e-05	-0.1182	6.444e-05	0.00107957	-0.1269	8.869e-06	0.000186131	-0.01739	0.2337	0.219679	SiteClass[FBgn0052473|CG32473|INTRON|0;FBgn0262844|CG43208|UPSTREAM|171;FBgn0038136|CG8774|DOWNSTREAM|921],TranscriptAnnot[DOWNSTREAM(MODIFIER||||885|CG8774|protein_coding|CODING|FBtr0082740|);DOWNSTREAM(MODIFIER||||942|CG8774|protein_coding|CODING|FBtr0082741|);INTRON(MODIFIER||||1012|CG32473|protein_coding|CODING|FBtr0082742|2);UPSTREAM(MODIFIER||||73|CG43208|protein_coding|CODING|FBtr0306120|)]	-
3L_3735670_SNP	G	A	A	0.4777	75	82	-0.1116	4.225e-05	0.00078795	-0.1241	5.596e-06	9.14518e-05	-0.1178	8.731e-06	0.000171694	0.01248	0.3375	0.352385	SiteClass[FBgn0052264|CG32264|INTRON|0],TranscriptAnnot[INTRON(MODIFIER||||1008|CG32264|protein_coding|CODING|FBtr0073187|5);INTRON(MODIFIER||||464|CG32264|protein_coding|CODING|FBtr0303097|1);INTRON(MODIFIER||||509|CG32264|protein_coding|CODING|FBtr0308638|2);INTRON(MODIFIER||||759|CG32264|protein_coding|CODING|FBtr0332986|4);INTRON(MODIFIER||||790|CG32264|protein_coding|CODING|FBtr0073188|2);IN…	-
2L_6116365_SNP	C	A	A	0.3444	52	99	0.1319	9.844e-06	9.84769e-05	0.1199	6.725e-05	0.000398927	0.1259	1.468e-05	0.000120122	0.01201	0.4117	0.403867	SiteClass[FBgn0051641|stai|INTRON|0],TranscriptAnnot[INTRON(MODIFIER||||250|stai|protein_coding|CODING|FBtr0079198|2);INTRON(MODIFIER||||257|stai|protein_coding|CODING|FBtr0079196|2);INTRON(MODIFIER||||302|stai|protein_coding|CODING|FBtr0079197|2);INTRON(MODIFIER||||302|stai|protein_coding|CODING|FBtr0333406|4)]	-
3R_9106088_SNP	T	A	A	0.487	75	79	0.1263	7.516e-06	0.000101359	0.1182	3.083e-05	0.000583796	0.1222	8.348e-06	0.000151058	0.008117	0.5546	0.549022	SiteClass[FBgn0038130|CG8630|INTRON|0],TranscriptAnnot[INTRON(MODIFIER||||408|CG8630|protein_coding|CODING|FBtr0082737|1)]	-
X_5091751_DEL	T	TT	TT	0.3723	51	86	0.141	5.728e-06	0.000108224	0.1132	0.0003428	0.00623823	0.1271	2.817e-05	0.000641968	0.0278	0.0769	0.06	SiteClass[FBgn0086911|rg|INTRON|0],TranscriptAnnot[INTRON(MODIFIER||||3505|rg|protein_coding|CODING|FBtr0299589|2);INTRON(MODIFIER||||3712|rg|protein_coding|CODING|FBtr0110993|2);INTRON(MODIFIER||||3722|rg|protein_coding|CODING|FBtr0290088|2)]	-
3R_9120437_SNP	A	C	C	0.2452	38	117	-0.1355	1.995e-05	0.000168656	-0.1376	1.256e-05	0.000255595	-0.1365	7.947e-06	0.000124412	0.002076	0.8984	0.894766	SiteClass[FBgn0038135|CG8773|UPSTREAM|33],TranscriptAnnot[INTERGENIC(MODIFIER|||||||||);UPSTREAM(MODIFIER||||994|CG8773|protein_coding|CODING|FBtr0290037|)]	(regulatory_region|REDfly_CRMs|FBsf0000435493),(TF_binding_site|BDTNP1_TFBS_da|FBsf0000329062),(TF_binding_site|BDTNP1_TFBS_dl|FBsf0000311420),(TF_binding_site|BDTNP1_TFBS_gt|FBsf0000294395),(TF_binding_site|BDTNP1_TFBS_hb|FBsf0000292448),(TF_binding_site|BDTNP1_TFBS_Med|FBsf0000285186),(TF_binding_site|BDTNP1_TFBS_sna|FBsf0000270955),(TF_binding_site|BDTNP1_TFBS_twi|FBsf0000264861),(TF_binding_s…
3R_13189510_INS	ACTTCGGA	A	A	0.2282	34	115	0.1484	1.367e-05	0.00024727	0.1458	1.739e-05	0.000253428	0.1471	7.938e-06	0.00015183	0.002508	0.8837	0.878514	SiteClass[FBgn0038498|beat-IIa|INTRON|0],TranscriptAnnot[INTRON(MODIFIER||||431|beat-IIa|protein_coding|CODING|FBtr0083453|1)]	-
2L_9074768_SNP	C	T	T	0.4052	62	91	0.1074	0.0001696	0.00232649	0.1261	8.931e-06	0.000152225	0.1168	2.439e-05	0.000416029	-0.01864	0.1675	0.176886	SiteClass[|||],TranscriptAnnot[INTERGENIC(MODIFIER|||||||||)]	-
3R_13277199_SNP	C	G	G	0.1772	28	130	-0.1435	6.53e-05	0.00129052	-0.1587	9.689e-06	0.000162386	-0.1511	1.377e-05	0.000303429	0.01523	0.3978	0.383875	SiteClass[|||],TranscriptAnnot[INTERGENIC(MODIFIER|||||||||)]	-
3R_9102255_SNP	T	A	A	0.4097	59	85	-0.1355	5.824e-06	0.000199835	-0.1343	7.298e-06	0.000427725	-0.1349	3.211e-06	0.000179975	-0.001202	0.9359	0.932724	SiteClass[|||],TranscriptAnnot[INTERGENIC(MODIFIER|||||||||)]	(TF_binding_site|BDTNP1_TFBS_prd|FBsf0000276479),(TF_binding_site|mE1_TFBS_HSA|FBsf0000371167)
3R_9755244_SNP	T	A	T	0.469	68	77	0.1274	9.703e-06	0.000198931	0.1061	0.0002875	0.00384388	0.1168	3.232e-05	0.000632221	0.02132	0.1458	0.126144	SiteClass[|||],TranscriptAnnot[INTERGENIC(MODIFIER|||||||||)]	-
[truncated: 5 more rows]

## Sheet: mal.12.pheno
Malathion 12-hour mortality raw phenotypes
DGRP line	male	female
21	0.220139	0.516835
26	0.688889	0.52
28	1	1
31	1	1
32	1	1
38	1	1
40	0.534722	0.503571
41	0	0.6
[truncated: 162 more rows]

## Sheet: mal.12.GWAS
Malathion 12-hour mortality DGRP pipeline output
[truncated: 386 more rows]

[truncated: 6 more sheets: mal.24.pheno, mal.24.GWAS, per.3KD.pheno, per.3KD.GWAS, per.24.pheno, per.24.GWAS]
