# Supplementary material
Source: publisher figshare collection journal article supplement (https://gsajournals.figshare.com/articles/dataset/_/6954443)
Supplement: Supplementary file 2 [file 1]

| Malathion phenotype    | <i>Cyp6g1</i> derived allele | <i>Cyp12d1</i> duplication | <i>Jheh1/Jheh2 Bari1</i> insertion | Permethrin phenotype   | <i>Cyp6a17/23</i> chimera | <i>Cyp6a17</i> deletion |
|------------------------|------------------------------|----------------------------|------------------------------------|------------------------|---------------------------|-------------------------|
| male 3-hr mortality    | 1.06E-02                     | 5.19E-01                   | 7.36E-01                           | male 3-hr KD           | 1.52E-01                  | 6.93E-06                |
| female 3-hr mortality  | 6.37E-03                     | 6.34E-01                   | 3.59E-01                           | female 3-hr KD         | 1.17E-01                  | 2.71E-06                |
| male 6-hr mortality    | 1.78E-02                     | 7.38E-01                   | 8.28E-01                           | male 24-hr mortality   | 1.96E-01                  | 9.92E-05                |
| female 6-hr mortality  | 1.16E-02                     | 7.03E-01                   | 8.75E-01                           | female 24-hr mortality | 8.38E-01                  | 2.89E-03                |
| male 12-hr mortality   | 1.02E-02                     | 7.16E-01                   | 8.59E-01                           |                        |                           |                         |
| female 12-hr mortality | 1.28E-07                     | 8.15E-01                   | 9.87E-01                           |                        |                           |                         |
| male 24-hr mortality   | 1.38E-03                     | 2.04E-01                   | 5.80E-01                           |                        |                           |                         |
| female 24-hr mortality | 1.22E-14                     | 2.95E-01                   | 8.32E-01                           |                        |                           |                         |
