# Supplementary material
Source: publisher figshare collection journal article supplement (https://gsajournals.figshare.com/articles/dataset/_/6954443)
Supplement: Supplementary file 4 [file 1]

| transcript               | minimum p-value | associated phenotypes (p<1.25E-4) |
|--------------------------|-----------------|-----------------------------------|
| <i>Cyp6g1</i>            | 2.98E-09        | male 3hr; female 3hr              |
| <i>Sf3a1</i>             | 6.50E-07        | male 12hr; male 24hr              |
| <i>Cyp12d1-p</i>         | 4.80E-06        | male 24hr                         |
| <i>CG32264</i>           | 8.01E-06        | male 6hr; male 12hr               |
| <i>CG34129</i>           | 1.06E-05        | male 6hr; male 12hr; male 24hr    |
| <i>Fie</i>               | 1.28E-05        | male 12hr                         |
| <i>nSyb</i>              | 1.39E-05        | male 6hr; male 12hr               |
| <i>Uhg1</i>              | 1.81E-05        | male 6hr; male 12hr               |
| <i>CG2065</i>            | 2.13E-05        | female 24hr                       |
| <i>XLOC_002155</i>       | 2.16E-05        | male 6hr                          |
| <i>Oamb</i>              | 2.48E-05        | male 6hr                          |
| <i>NetB</i>              | 2.65E-05        | male 3hr                          |
| <i>CG42751</i>           | 2.79E-05        | male 3hr; male 6hr; male 12hr     |
| <i>CG31826</i>           | 2.96E-05        | male 3hr                          |
| <i>Vkor</i>              | 3.74E-05        | female 3hr; female 6hr            |
| <i>mdy</i>               | 3.90E-05        | male 12hr                         |
| <i>Cyp4e2</i>            | 3.93E-05        | male 24hr                         |
| <i>XLOC_002848</i>       | 4.33E-05        | male 3hr                          |
| <i>DNApol-epsilon255</i> | 4.47E-05        | male 6hr; male 12hr               |
| <i>Jheh2</i>             | 4.52E-05        | male 3hr                          |
| <i>Jheh1</i>             | 4.62E-05        | male 24hr                         |
| <i>CG14196</i>           | 5.65E-05        | male 24hr                         |
| <i>CG13759</i>           | 5.87E-05        | male 12hr                         |
| <i>BG642163</i>          | 5.96E-05        | male 6hr                          |
| <i>CG9413</i>            | 6.25E-05        | male 6hr                          |
| <i>CG10348</i>           | 6.43E-05        | male 24hr                         |
| <i>icln</i>              | 7.17E-05        | male 6hr; male 12hr               |
| <i>CG6324</i>            | 7.27E-05        | male 6hr                          |
| <i>CG12950</i>           | 7.28E-05        | male 3hr                          |
| <i>CG30423</i>           | 7.77E-05        | male 3hr                          |
| <i>gammaTub37C</i>       | 8.52E-05        | male 12hr                         |
| <i>CG12643</i>           | 8.85E-05        | female 24hr                       |
| <i>alpha-Man-IIb</i>     | 8.91E-05        | male 24hr                         |
| <i>CG12448</i>           | 9.38E-05        | male 3hr                          |
| <i>CG7276</i>            | 9.53E-05        | male 12hr                         |
| <i>ppan</i>              | 9.70E-05        | male 12hr                         |
| <i>CG31445</i>           | 9.72E-05        | male 3hr                          |
| <i>igl</i>               | 1.03E-04        | male 12hr                         |
| <i>CG32762</i>           | 1.03E-04        | male 3hr                          |
| <i>Usp16-45</i>          | 1.06E-04        | male 24hr                         |
| <i>Cyp6g2</i>            | 1.10E-04        | female 3hr                        |
| <i>XLOC_001186</i>       | 1.15E-04        | male 6hr                          |
