# Supplementary material
Source: publisher figshare collection journal article supplement (https://gsajournals.figshare.com/articles/dataset/_/6954443)
Supplement: Supplementary file 5 [file 1]

| tool        | p-value  | genes identified                                         | phenotype         |
|-------------|----------|----------------------------------------------------------|-------------------|
| R_spider    | 1.00E-02 | <i>Cyp6a23, Cyp6a19, Cyp6a9, Cyp317a1</i>                | permethrin female |
| KEGG_spider | 4.95E-01 | <i>Cyp6a23, Cyp6a19, Cyp6a9, Cyp317a1</i>                | permethrin female |
| ProfCom_GO  | 1.00E-02 | <i>CG34449, Cyp6a23, Cyp6a19, Cyp6a9, Cyp317a1, Trpm</i> | permethrin female |
