# Supplementary material
Source: publisher figshare collection journal article supplement (https://gsajournals.figshare.com/articles/dataset/_/6954443)
Supplement: Supplementary file 7 [file 1]

| phenotype                         | broad-sense<br>heritability | sex effect | significant covariate effects    |
|-----------------------------------|-----------------------------|------------|----------------------------------|
| malathion male 3-hr mortality     | 0.56                        | 0.02       | -                                |
| malathion female 3-hr mortality   | 0.64                        | -          | ln_2R_NS (0.28); ln_3R_P(0.34)   |
| malathion male 6-hr mortality     | 0.65                        | 0.04       | wolbachia (-0.16)                |
| malathion female 6-hr mortality   | 0.68                        | -          | wolbachia (-0.14)                |
| malathion male 12-hr mortality    | 0.64                        | 0.04       | wolbachia (-0.16)                |
| malathion female 12-hr mortality  | 0.68                        | -          | wolbachia (-0.15); ln_3R_P(0.33) |
| malathion male 24-hr mortality    | 0.61                        | 0.04       | wolbachia (-0.10)                |
| malathion female 24-hr mortality  | 0.58                        | -          | -                                |
| permethrin male 3-hr knockdown    | 0.60                        | 0.11       | wolbachia (-0.12)                |
| permethrin female 3-hr knockdown  | 0.56                        | -          | -                                |
| permethrin male 24-hr mortality   | 0.61                        | 0.24       | wolbachia (-0.15)                |
| permethrin female 24-hr mortality | 0.61                        | -          | wolbachia (-0.12)                |
