# Supplementary material
Source: publisher figshare collection journal article supplement (https://gsajournals.figshare.com/articles/dataset/_/6954443)
Supplement: Supplementary file 8 [file 1]

| location    | annotation                                                                    | eQTL            | veQTL           |
|-------------|-------------------------------------------------------------------------------|-----------------|-----------------|
| X:5332300   |                                                                               |                 |                 |
| X:6902425   | lnx7 (intron); cm (downstream)                                                |                 |                 |
| X:10576880  | X11Lbeta (intron)                                                             |                 |                 |
| X:11614946  | Tango10 (synonymous)                                                          |                 |                 |
| X:15209738  | CR44961 (exon); gce (intron)                                                  |                 |                 |
| X:15211890  | CR44961 (exon); gce (3'UTR)                                                   |                 |                 |
| X:15211895  | CR44961 (exon); gce (3'UTR)                                                   |                 |                 |
| X:15212796  | gce (3'UTR); Top1 (upstream); CR44961 (upstream)                              |                 |                 |
| X:15222038  | Top1 (3'UTR); dah (upstream)                                                  |                 |                 |
| X:15241431  | CG6227 (intron)                                                               |                 |                 |
| X:15241453  | CG6227 (intron)                                                               |                 |                 |
| 2L:1197775  | CG5139 (downstream); CG5001 (downstream)                                      |                 |                 |
| 2L:4277785  | Art2 (3'UTR)                                                                  |                 |                 |
| 2L:4277786  | Art2 (3'UTR)                                                                  |                 |                 |
| 2L:4277819  | Art2 (3'UTR)                                                                  |                 |                 |
| 2L:4295343  | tutI (nonsynonymous)                                                          |                 |                 |
| 2L:6334848  | Pez (synonymous)                                                              |                 |                 |
| 2L:8758627  |                                                                               |                 |                 |
| 2L:9095535  |                                                                               |                 |                 |
| 2L:10787708 | CG31869 (intron)                                                              |                 |                 |
| 2L:18644589 | MESR3 (intron)                                                                |                 |                 |
| 2L:20933564 | CG9270 (nonsynonymous)                                                        |                 |                 |
| 2L:20947381 | CR44606 (exon)                                                                |                 |                 |
| 2R:5436340  | CG1888 (upstream)                                                             |                 |                 |
| 2R:7204782  | nompA (intron)                                                                | Madm            |                 |
| 2R:8059576  | Oda (intron)                                                                  | Cyp6g1; Cyp6g2  |                 |
| 2R:8060092  | Oda (intron)                                                                  | Cyp6g1; Cyp6g2  |                 |
| 2R:8060123  | Oda (intron)                                                                  | Cyp6g1; Cyp6g2  |                 |
| 2R:8060142  | Oda (intron)                                                                  | Cyp6g1; Cyp6g2  |                 |
| 2R:8061873  | Oda (upstream); Cct5 (upstream)                                               | Cyp6g1; Cyp6g2  |                 |
| 2R:8061931  | Oda (upstream); Cct5 (upstream)                                               | Cyp6g1; Cyp6g2  |                 |
| 2R:8062180  | Cct5 (upstream); Oda (upstream)                                               | Cyp6g1; Cyp6g2  |                 |
| 2R:8063706  | Cct5 (synonymous)                                                             | Cyp6g1; Cyp6g2  |                 |
| 2R:8063730  | Cct5 (synonymous)                                                             | Cyp6g1; Cyp6g2  |                 |
| 2R:8068113  | wash (intron); CG8860 (upstream); CR45264 (downstream)                        | Cyp6g1; Cyp6g2  |                 |
| 2R:8068499  | wash (synonymous)                                                             | Cyp6g1; Cyp6g2  |                 |
| 2R:8070658  | CG33964 (5'UTR); CG13175 (nonsynonymous); SmF (downstream); wash (downstream) | Cyp6g1; Cyp6g2  |                 |
| 2R:8072837  | CG13175 (3'UTR); CG33964 (3'UTR); Cyp6g1 (upstream)                           | Cyp6g1; Cyp6g2  |                 |
| 2R:8072884  | CG33964 (3'UTR); CG13175 (3'UTR); Cyp6g1 (upstream)                           | Cyp6g1; Cyp6g2  |                 |
| 2R:8072902  | CG13175 (3'UTR); CG33964 (3'UTR); Cyp6g1 (upstream)                           | Cyp6g1; Cyp6g2  |                 |
| 2R:8072916  | CG33964 (3'UTR); CG13175 (3'UTR); Cyp6g1 (upstream)                           | Cyp6g1; Cyp6g2  |                 |
| 2R:8073503  | Cyp6g1 (intron); CG13175 (downstream); CG33964 (downstream)                   | Cyp6g1; Cyp6g2  |                 |
| 2R:9389095  | drk (intron); mars (intron)                                                   |                 |                 |
| 2R:12630129 |                                                                               |                 |                 |
| 2R:17311105 | Sdc (intron)                                                                  |                 |                 |
| 2R:17581542 | CngB (synonymous)                                                             |                 |                 |
| 2R:17639707 |                                                                               |                 |                 |
| 2R:19476075 | apt (intron)                                                                  |                 |                 |
| 3L:4115889  | Chd64 (intron)                                                                |                 |                 |
| 3L:5428592  | CG34391 (intron)                                                              |                 |                 |
| 3L:5428593  | CG34391 (intron)                                                              |                 |                 |
| 3L:9109461  | bol (intron)                                                                  |                 |                 |
| 3L:10022121 | dpr6 (intron); CR45155 (downstream)                                           |                 |                 |
| 3L:15034879 | Sylbeta (intron); Rpn12R (synonymous)                                         |                 |                 |
| 3L:15115418 | CG16959 (intron); Cep135 (intron); CG32847 (downstream)                       |                 |                 |
| 3L:15508763 | CG13454 (downstream)                                                          |                 |                 |
| 3L:16752714 |                                                                               |                 |                 |
| 3L:18807947 | CG14073 (intron)                                                              |                 |                 |
| 3L:20172441 | CG42674 (intron)                                                              |                 |                 |
| 3R:5587726  | Snap24 (3'UTR); CG8417 (downstream)                                           |                 |                 |
| 3R:5636504  | CR44035 (exon)                                                                |                 |                 |
| 3R:5650896  | CR42858 (upstream); Teh1 (downstream)                                         |                 |                 |
| 3R:5651319  | Teh1 (downstream); CR42858 (upstream)                                         |                 |                 |
| 3R:5696879  |                                                                               |                 |                 |
| 3R:6044043  | Syn (synonymous)                                                              |                 |                 |
| 3R:6077388  | CG3999 (synonymous); CG42795 (downstream)                                     |                 |                 |
| 3R:6312944  |                                                                               |                 |                 |
| 3R:6318598  |                                                                               |                 |                 |
| 3R:6346660  | hth (intron)                                                                  |                 |                 |
| 3R:6348794  | hth (intron)                                                                  |                 |                 |
| 3R:6358830  | hth (intron)                                                                  |                 |                 |
| 3R:6370589  | hth (intron)                                                                  |                 |                 |
| 3R:6382372  | hth (intron)                                                                  |                 |                 |
| 3R:6385704  | hth (intron)                                                                  |                 |                 |
| 3R:6393220  | hth (intron)                                                                  |                 |                 |
| 3R:6393729  | hth (intron)                                                                  |                 |                 |
| 3R:6407337  | hth (downstream)                                                              |                 |                 |
| 3R:6407950  | hth (downstream)                                                              |                 |                 |
| 3R:6728127  |                                                                               |                 |                 |
| 3R:7312014  | CR45581 (upstream)                                                            |                 |                 |
| 3R:8735741  | CG10909 (downstream)                                                          |                 | Hsc70-2; CG7966 |
| 3R:8735801  | CG10909 (downstream)                                                          |                 | Hsc70-2; CG7966 |
| 3R:8976262  | CR45109 (intron); 2mit (intron); timeout (intron)                             |                 | Hsc70-2; CG7966 |
| 3R:8978647  | CR45109 (intron); 2mit (intron); timeout (intron)                             | Hsc70-2; CG7966 | Hsc70-2; CG7966 |
| 3R:8979756  | 2mit (intron); timeout (intron); CR45109 (intron)                             |                 |                 |
| 3R:8979770  | CR45109 (intron); timeout (intron); 2mit (intron)                             | Hsc70-2         | Hsc70-2; CG7966 |
| 3R:8979771  | CR45109 (intron); 2mit (intron); timeout (intron)                             | Hsc70-2         | Hsc70-2; CG7966 |
| 3R:8979781  | 2mit (intron); timeout (intron); CR45109 (intron)                             |                 |                 |
| 3R:8979958  | timeout (intron); 2mit (intron); CR45109 (intron)                             |                 |                 |
| 3R:8980033  | timeout (intron); 2mit (intron); CR45109 (intron)                             |                 |                 |
| 3R:8985973  | timeout (intron)                                                              |                 |                 |
| 3R:8986185  | timeout (intron)                                                              |                 |                 |
| 3R:8986186  | timeout (intron)                                                              |                 |                 |
| 3R:8986205  | timeout (intron)                                                              |                 | CG7966          |
| 3R:8986215  | timeout (intron)                                                              |                 | CG7966          |
| 3R:8986217  | timeout (intron)                                                              |                 |                 |
| 3R:8986293  | timeout (intron)                                                              |                 |                 |
| 3R:8987558  | timeout (intron)                                                              |                 |                 |
| 3R:8988291  | timeout (stop gained)                                                         | Hsc70-2         | Hsc70-2; CG7966 |
| 3R:8988335  | timeout (nonsynonymous)                                                       | Hsc70-2         | Hsc70-2; CG7966 |
| 3R:8988821  | timeout (synonymous)                                                          |                 | Hsc70-2; CG7966 |
| 3R:8990351  | timeout (downstream)                                                          |                 |                 |
| 3R:8990410  | timeout (downstream)                                                          |                 |                 |
| 3R:8990415  | timeout (downstream)                                                          |                 |                 |
| 3R:8990428  | timeout (downstream)                                                          |                 |                 |
| 3R:8990454  | timeout (downstream)                                                          |                 |                 |
| 3R:8990896  |                                                                               |                 |                 |

|             |                                          |                               |                 |
|-------------|------------------------------------------|-------------------------------|-----------------|
| 3R:8991896  |                                          |                               |                 |
| 3R:8994127  |                                          |                               |                 |
| 3R:8994147  |                                          |                               |                 |
| 3R:8994155  |                                          |                               |                 |
| 3R:8994268  |                                          |                               |                 |
| 3R:8998765  |                                          |                               |                 |
| 3R:8999499  |                                          |                               |                 |
| 3R:9005478  |                                          |                               |                 |
| 3R:9005502  |                                          |                               |                 |
| 3R:9005683  |                                          |                               |                 |
| 3R:9005935  |                                          |                               |                 |
| 3R:9011884  | CG8508 (nonsynonymous)                   |                               |                 |
| 3R:9012627  | CG8508 (upstream)                        |                               |                 |
| 3R:9013089  | CG8508 (upstream)                        |                               |                 |
| 3R:9013468  | CG14380 (upstream)                       |                               |                 |
| 3R:9014198  | CG14380 (upstream)                       |                               |                 |
| 3R:9014302  | CG14380 (5'UTR)                          |                               |                 |
| 3R:9014506  | CG14380 (synonymous)                     |                               |                 |
| 3R:9015116  | CG14380 (3'UTR)                          |                               |                 |
| 3R:9017284  | CG8141 (upstream)                        |                               |                 |
| 3R:9017823  | CG8141 (nonsynonymous)                   |                               |                 |
| 3R:9017824  | CG8141 (nonsynonymous)                   |                               |                 |
| 3R:9018021  | CG8141 (nonsynonymous)                   |                               |                 |
| 3R:9018353  | CG8141 (downstream)                      |                               |                 |
| 3R:9018365  | CG8141 (downstream)                      |                               |                 |
| 3R:9018366  | CG8141 (downstream)                      |                               |                 |
| 3R:9018389  | CG8141 (downstream)                      |                               |                 |
| 3R:9025266  |                                          |                               |                 |
| 3R:9028964  |                                          |                               | CG7966          |
| 3R:9030746  |                                          |                               |                 |
| 3R:9030755  |                                          |                               |                 |
| 3R:9030772  |                                          |                               |                 |
| 3R:9031423  |                                          | Hsc70-2; CG7966               | CG7966          |
| 3R:9031458  |                                          | Hsc70-2; CG7966               | Hsc70-2; CG7966 |
| 3R:9031918  |                                          |                               |                 |
| 3R:9031928  |                                          |                               |                 |
| 3R:9033214  |                                          | Hsc70-2; CG7966               | Hsc70-2; CG7966 |
| 3R:9033221  |                                          | Hsc70-2; CG7966; CG44142      | Hsc70-2; CG7966 |
| 3R:9033676  | CG8483 (downstream)                      |                               |                 |
| 3R:9034291  | CG8483 (downstream)                      |                               |                 |
| 3R:9035756  | CG8483 (intron)                          |                               |                 |
| 3R:9035795  | CG8483 (splice site region)              |                               |                 |
| 3R:9035837  | CG8483 (synonymous)                      |                               |                 |
| 3R:9035867  | CG8483 (synonymous)                      |                               |                 |
| 3R:9036002  | CG8483 (synonymous)                      |                               |                 |
| 3R:9036107  | CG8483 (intron)                          |                               |                 |
| 3R:9037591  | CG8483 (intron)                          |                               |                 |
| 3R:9038276  | CG8483 (intron)                          |                               |                 |
| 3R:9043065  |                                          |                               |                 |
| 3R:9048572  | Ace (downstream)                         |                               |                 |
| 3R:9048838  | Ace (3'UTR)                              | CG44142                       |                 |
| 3R:9048955  | Ace (3'UTR)                              | CG44142                       |                 |
| 3R:9048956  | Ace (3'UTR)                              | CG44142                       |                 |
| 3R:9059524  | Ace (intron)                             | Hsc70-2                       | CG7966          |
| 3R:9061359  | Ace (intron)                             | CG14372                       |                 |
| 3R:9069054  | Ace (nonsynonymous)                      |                               |                 |
| 3R:9069248  | Ace (intron)                             |                               |                 |
| 3R:9069408  | Ace (nonsynonymous)                      |                               |                 |
| 3R:9069608  | Ace (synonymous)                         | Hsc70-2; CG7966; CG17691      | Hsc70-2; CG7966 |
| 3R:9069611  | Ace (synonymous)                         |                               |                 |
| 3R:9069659  | Ace (synonymous)                         |                               |                 |
| 3R:9069721  | Ace (nonsynonymous)                      | Hsc70-2; CG7966               | Hsc70-2; CG7966 |
| 3R:9076295  | Ace (intron)                             | CG7966; CG44142               | Hsc70-2; CG7966 |
| 3R:9076302  | Ace (intron)                             | CG7966; CG44142               | Hsc70-2; CG7966 |
| 3R:9076306  | Ace (intron)                             | CG7966; CG44142               | Hsc70-2; CG7966 |
| 3R:9076308  | Ace (intron)                             | CG7966; CG44142               | Hsc70-2; CG7966 |
| 3R:9076310  | Ace (intron)                             | CG7966                        | CG7966          |
| 3R:9076317  | Ace (intron)                             | CG7966; CG44142               | CG7966          |
| 3R:9076807  | Ace (intron)                             | Hsc70-2; CG7966; CG44142      | CG7966          |
| 3R:9077048  | Ace (intron)                             | Hsc70-2; CG44142              | CG7966          |
| 3R:9077051  | Ace (intron)                             | Hsc70-2; CG7966               | CG7966          |
| 3R:9077232  | Ace (intron)                             | CG44142                       | CG7966          |
| 3R:9077233  | Ace (intron)                             | CG44142                       | CG7966          |
| 3R:9078332  | Ace (intron)                             | CG44142                       | Hsc70-2; CG7966 |
| 3R:9078578  | Ace (intron)                             |                               |                 |
| 3R:9078718  | Ace (intron)                             |                               |                 |
| 3R:9078765  | Ace (intron)                             |                               |                 |
| 3R:9087502  | CG11686 (intron); Ravus (downstream)     | CG7966; CG44142               | Hsc70-2; CG7966 |
| 3R:9087504  | CG11686 (intron); Ravus (downstream)     | CG7966; CG44142               | Hsc70-2; CG7966 |
| 3R:9087510  | CG11686 (intron); Ravus (downstream)     | CG44142                       | CG7966          |
| 3R:9087531  | CG11686 (intron); Ravus (downstream)     | CG44142                       |                 |
| 3R:9087669  | CG11686 (intron); Ravus (downstream)     | CG44142                       | CG7966          |
| 3R:9088196  | CG11686 (downstream); Ravus (downstream) |                               |                 |
| 3R:9100401  |                                          | CG14372                       |                 |
| 3R:9101511  |                                          | CG44142                       |                 |
| 3R:9101779  |                                          | Hsc70-2; CG44142; XLOC_003905 | CG7966          |
| 3R:9101860  |                                          |                               | Hsc70-2; CG7966 |
| 3R:9102354  |                                          | Hsc70-2; CG7966               | Hsc70-2; CG7966 |
| 3R:9102363  |                                          | CG44142                       |                 |
| 3R:9102472  |                                          | CG44142                       |                 |
| 3R:9104280  |                                          |                               |                 |
| 3R:9114055  | CG15887 (intron)                         |                               |                 |
| 3R:9114081  | CG15887 (intron)                         | CG44142                       |                 |
| 3R:9188851  | poly (intron)                            |                               |                 |
| 3R:9188878  | poly (intron)                            |                               |                 |
| 3R:9203094  | CR44138 (exon); CG9813 (intron)          | CG7966                        | Hsc70-2         |
| 3R:10005491 | Dop1R1 (intron)                          |                               |                 |
| 3R:10005528 | Dop1R1 (intron)                          |                               |                 |
| 3R:11025977 | CG42542 (intron)                         |                               |                 |
| 3R:11631830 | alpha-Man-IIIb (intron)                  |                               |                 |
| 3R:13258656 | CG5873 (intron)                          |                               |                 |
| 3R:13277108 |                                          | XLOC_004064                   | XLOC_004064     |
| 3R:13277130 |                                          | XLOC_004064                   | XLOC_004064     |
| 3R:13277147 |                                          | XLOC_004064                   | XLOC_004064     |
| 3R:13346741 |                                          |                               |                 |
| 3R:13346742 |                                          |                               |                 |
| 3R:13354019 |                                          |                               |                 |
| 3R:18690243 |                                          |                               | dik             |
| 3R:18690248 |                                          |                               | dik             |

3R.24736602  
3R.25828112

Doa (intron)  
Tace (intron)
