# Supplementary material
Source: publisher figshare collection journal article supplement (https://gsajournals.figshare.com/articles/dataset/_/6954443)
Supplement: Supplementary file 9 [file 1]

| location    | annotation                                        | eQTL    | veQTL |
|-------------|---------------------------------------------------|---------|-------|
| X:2419275   | trol (intron)                                     |         |       |
| X:7796524   | bys (synonymous)                                  |         |       |
| X:7802493   | dpr14 (upstream); CG1444 (upstream)               |         |       |
| X:7802873   | CG1444 (upstream); dpr14 (upstream)               |         |       |
| X:10070001  | CG43902 (intron); CR44894 (intron)                |         |       |
| X:11031712  | CG18292 (upstream); Klp10A (upstream)             |         |       |
| X:11614932  | Tango10 (nonsynonymous)                           |         |       |
| X:11614946  | Tango10 (synonymous)                              |         |       |
| X:12617153  | Smr (intron); CR43963 (intron)                    |         |       |
| X:12758474  | Pde9 (intron)                                     |         |       |
| X:12758481  | Pde9 (intron)                                     |         |       |
| X:13147627  | mew (intron)                                      |         |       |
| X:13147684  | mew (intron)                                      |         |       |
| X:15209738  | CR44961 (exon); gce (intron)                      |         |       |
| X:15211890  | CR44961 (exon); gce (3'UTR)                       |         |       |
| X:15211895  | CR44961 (exon); gce (3'UTR)                       |         |       |
| X:15223088  | dah (synonymous)                                  |         |       |
| X:15241431  | CG6227 (intron)                                   |         |       |
| X:15241453  | CG6227 (intron)                                   |         |       |
| X:20339937  | GstT3 (intron)                                    |         |       |
| X:22067684  | CR44997 (intron)                                  |         |       |
| 2L:2271389  | CR43753 (exon)                                    |         |       |
| 2L:4081046  | ed (intron)                                       |         |       |
| 2L:6237389  |                                                   |         |       |
| 2L:6237483  |                                                   |         |       |
| 2L:6334848  | Pez (synonymous)                                  |         |       |
| 2L:7260106  | Wnt4 (intron)                                     |         |       |
| 2L:9095535  |                                                   |         |       |
| 2L:10787708 | CG31869 (intron)                                  |         |       |
| 2L:14039221 | CR45284 (upstream); nChRalpha5 (upstream)         |         |       |
| 2L:18644589 | MESR3 (intron)                                    |         |       |
| 2L:18644622 | MESR3 (intron)                                    |         |       |
| 2L:19303070 |                                                   |         |       |
| 2L:20858283 | CG14400 (upstream); CG9336 (upstream)             |         |       |
| 2R:7688863  | ths (intron)                                      |         |       |
| 2R:7688886  | ths (intron)                                      |         |       |
| 2R:7820529  |                                                   |         |       |
| 2R:10612435 |                                                   |         |       |
| 2R:11639298 | CG30089 (intron)                                  |         |       |
| 2R:12630129 |                                                   |         |       |
| 2R:17339499 | Sdc (intron)                                      |         |       |
| 3L:2025658  |                                                   |         |       |
| 3L:4115889  | Chd64 (intron)                                    |         |       |
| 3L:6864577  |                                                   |         |       |
| 3L:6864587  |                                                   |         |       |
| 3L:6864606  |                                                   |         |       |
| 3L:6864607  |                                                   |         |       |
| 3L:6864619  |                                                   |         |       |
| 3L:6864651  |                                                   |         |       |
| 3L:6864688  |                                                   |         |       |
| 3L:9109461  | bol (intron)                                      |         |       |
| 3L:18012945 | Eip75B (intron)                                   |         |       |
| 3L:18168486 | W (intron)                                        |         |       |
| 3L:23347639 |                                                   |         |       |
| 3R:5696879  |                                                   |         |       |
| 3R:6077388  | CG3999 (synonymous); CG42795 (downstream)         |         |       |
| 3R:6348794  | hth (intron)                                      |         |       |
| 3R:7311619  | CR45581 (upstream)                                |         |       |
| 3R:7312014  | CR45581 (upstream)                                |         |       |
| 3R:7350497  |                                                   |         |       |
| 3R:8978647  | CR45109 (intron); 2mit (intron); timeout (intron) | CG31157 |       |
| 3R:8979756  | 2mit (intron); timeout (intron); CR45109 (intron) |         |       |
| 3R:8979770  | CR45109 (intron); timeout (intron); 2mit (intron) |         |       |
| 3R:8979771  | CR45109 (intron); 2mit (intron); timeout (intron) |         |       |
| 3R:8979781  | 2mit (intron); timeout (intron); CR45109 (intron) |         |       |
| 3R:8979958  | timeout (intron); 2mit (intron); CR45109 (intron) |         |       |
| 3R:8985973  | timeout (intron)                                  |         |       |
| 3R:8986185  | timeout (intron)                                  |         |       |
| 3R:8986186  | timeout (intron)                                  |         |       |
| 3R:8986205  | timeout (intron)                                  |         |       |
| 3R:8986215  | timeout (intron)                                  |         |       |
| 3R:8986217  | timeout (intron)                                  |         |       |
| 3R:8986293  | timeout (intron)                                  |         |       |
| 3R:8988291  | timeout (stop gained)                             |         |       |
| 3R:8988335  | timeout (nonsynonymous)                           |         |       |
| 3R:8988821  | timeout (synonymous)                              |         |       |
| 3R:8990351  | timeout (downstream)                              |         |       |
| 3R:8990410  | timeout (downstream)                              |         |       |
| 3R:8990415  | timeout (downstream)                              |         |       |
| 3R:8990428  | timeout (downstream)                              |         |       |
| 3R:8990896  |                                                   |         |       |
| 3R:8994147  |                                                   |         |       |
| 3R:8994155  |                                                   |         |       |
| 3R:8994268  |                                                   |         |       |
| 3R:8998765  |                                                   | CG31157 |       |
| 3R:8998807  |                                                   |         |       |
| 3R:9005478  |                                                   |         |       |
| 3R:9005502  |                                                   |         |       |
| 3R:9005935  |                                                   |         |       |
| 3R:9012627  | CG8508 (upstream)                                 |         |       |
| 3R:9013089  | CG8508 (upstream)                                 |         |       |
| 3R:9013468  | CG14380 (upstream)                                |         |       |
| 3R:9014198  | CG14380 (upstream)                                |         |       |
| 3R:9014302  | CG14380 (5'UTR)                                   |         |       |
| 3R:9014506  | CG14380 (synonymous)                              |         |       |
| 3R:9015116  | CG14380 (3'UTR)                                   |         |       |
| 3R:9017823  | CG8141 (nonsynonymous)                            |         |       |
| 3R:9017824  | CG8141 (nonsynonymous)                            |         |       |
| 3R:9018021  | CG8141 (nonsynonymous)                            |         |       |
| 3R:9018353  | CG8141 (downstream)                               |         |       |
| 3R:9018365  | CG8141 (downstream)                               |         |       |
| 3R:9018366  | CG8141 (downstream)                               |         |       |
| 3R:9018389  | CG8141 (downstream)                               |         |       |
| 3R:9026809  |                                                   |         |       |
| 3R:9028964  |                                                   |         |       |
| 3R:9031423  |                                                   |         |       |
| 3R:9031918  |                                                   |         |       |

|             |                                      |                                       |
|-------------|--------------------------------------|---------------------------------------|
| 3R:9031928  |                                      |                                       |
| 3R:9033676  | CG8483 (downstream)                  |                                       |
| 3R:9034291  | CG8483 (downstream)                  | CG31157                               |
| 3R:9035756  | CG8483 (intron)                      |                                       |
| 3R:9035795  | CG8483 (splice site region)          |                                       |
| 3R:9035867  | CG8483 (synonymous)                  |                                       |
| 3R:9037591  | CG8483 (intron)                      |                                       |
| 3R:9043065  |                                      |                                       |
| 3R:9069054  | Ace (nonsynonymous)                  |                                       |
| 3R:9069248  | Ace (intron)                         |                                       |
| 3R:9069408  | Ace (nonsynonymous)                  |                                       |
| 3R:9069611  | Ace (synonymous)                     | CR17025                               |
| 3R:9069659  | Ace (synonymous)                     | CG31157                               |
| 3R:9069721  | Ace (nonsynonymous)                  |                                       |
| 3R:9076295  | Ace (intron)                         | CG7966; CG31157; CG44142; XLOC_003905 |
| 3R:9076302  | Ace (intron)                         | CG7966; CG31157; CG44142; XLOC_003905 |
| 3R:9076306  | Ace (intron)                         | CG7966; CG31157; CG44142; XLOC_003905 |
| 3R:9076308  | Ace (intron)                         | CG7966; CG31157; CG44142; XLOC_003905 |
| 3R:9076310  | Ace (intron)                         | CG7966; CG31157; CG44142; XLOC_003905 |
| 3R:9076317  | Ace (intron)                         | CG7966; CG31157; CG44142; XLOC_003905 |
| 3R:9077051  | Ace (intron)                         | CG7966; CG44142                       |
| 3R:9077232  | Ace (intron)                         | CG44142                               |
| 3R:9077233  | Ace (intron)                         | CG44142                               |
| 3R:9077555  | Ace (intron)                         |                                       |
| 3R:9078332  | Ace (intron)                         | CG44142; XLOC_003905                  |
| 3R:9078718  | Ace (intron)                         |                                       |
| 3R:9078765  | Ace (intron)                         |                                       |
| 3R:9087502  | CG11686 (intron); Ravus (downstream) | CG7966; CG44142; XLOC_003905          |
| 3R:9087504  | CG11686 (intron); Ravus (downstream) | CG7966; CG31157; CG44142; XLOC_003905 |
| 3R:9087510  | CG11686 (intron); Ravus (downstream) | CG44142                               |
| 3R:9087531  | CG11686 (intron); Ravus (downstream) | CG44142                               |
| 3R:9087655  | CG11686 (intron); Ravus (downstream) | CG31157; CG44142                      |
| 3R:9087669  | CG11686 (intron); Ravus (downstream) | CG44142; XLOC_003905                  |
| 3R:9101860  |                                      | CG44142                               |
| 3R:9102472  |                                      |                                       |
| 3R:9114055  | CG15887 (intron)                     |                                       |
| 3R:9114081  | CG15887 (intron)                     | CG14372                               |
| 3R:9120655  | CG8773 (synonymous)                  |                                       |
| 3R:10534764 | kibra (intron)                       |                                       |
| 3R:11587775 |                                      |                                       |
| 3R:11587786 |                                      |                                       |
| 3R:11643387 | alpha-Man-IIb (intron)               |                                       |
| 3R:13460801 | CG43175 (intron)                     |                                       |
| 3R:13784262 | cpo (intron)                         |                                       |
| 3R:13784323 | cpo (intron)                         |                                       |
