# Supplementary material
Source: publisher figshare collection journal article supplement (https://gsajournals.figshare.com/articles/dataset/_/6954443)
Supplement: Supplementary file 10 [file 1]

| location    | annotation                                                 | eQTL      | veQTL   |
|-------------|------------------------------------------------------------|-----------|---------|
| X:3615755   | tlk (intron)                                               |           |         |
| X:9229442   | CG34449 (intron)                                           |           |         |
| X:9229767   | CG34449 (intron)                                           |           |         |
| X:9941718   | Cht6 (intron); CR45185 (exon); CR45219 (exon)              |           |         |
| 2L:1490093  |                                                            |           |         |
| 2L:4961580  | CG34124 (intron)                                           |           |         |
| 2L:6195027  | CG34380 (intron)                                           |           |         |
| 2L:14415203 |                                                            |           |         |
| 2R:10756792 | Inr-a (downstream)                                         |           |         |
| 2R:10764464 | Cyp6a23 (intron); Cyp6a19 (upstream)                       |           | Cyp6a17 |
| 2R:10764570 | Cyp6a23 (synonymous); Cyp6a19 (upstream)                   |           | Cyp6a17 |
| 2R:10764798 | Cyp6a23 (synonymous); Cyp6a19 (upstream)                   |           | Cyp6a17 |
| 2R:10767181 | Cyp6a9 (3'UTR); Cyp6a19 (downstream)                       |           |         |
| 2R:10787290 | Cyp317a1 (synonymous)                                      |           |         |
| 2R:10787296 | Cyp317a1 (synonymous)                                      |           |         |
| 2R:10787494 | Cyp317a1 (synonymous)                                      |           |         |
| 2R:10787515 | Cyp317a1 (synonymous)                                      |           |         |
| 2R:10787521 | Cyp317a1 (synonymous)                                      |           |         |
| 2R:11163763 | Trpm (intron)                                              |           |         |
| 2R:14908715 |                                                            |           |         |
| 3L:5728801  | sif (intron)                                               |           |         |
| 3L:7686994  | Ank2 (intron); CG44195 (intron); CG32373 (intron)          |           |         |
| 3L:9857381  | iPLA2-VIA (start gained); CG8108 (upstream)                | iPLA2-VIA |         |
| 3L:10704497 |                                                            |           |         |
| 3L:10704500 |                                                            |           |         |
| 3L:11359947 | CR45036 (downstream)                                       |           |         |
| 3L:13943740 | CG32137 (intron)                                           |           |         |
| 3L:15088526 | Aats-gly (synonymous); cp309 (upstream); CG6945 (upstream) |           |         |
| 3L:15100984 | CG45071 (intron); CTPsyn (intron); CR43971 (downstream)    |           |         |
| 3L:15739762 | CR45240 (upstream)                                         |           |         |
| 3R:12944329 | cher (intron)                                              |           |         |
| 3R:18809639 | Nha2 (nonsynonymous)                                       |           | CG11334 |
| 3R:18809655 | Nha2 (synonymous)                                          |           |         |
