# Supplementary material
Source: publisher figshare collection journal article supplement (https://gsajournals.figshare.com/articles/dataset/_/6954443)
Supplement: Supplementary file 11 [file 1]

| location    | annotation                               | eQTL           | veQTL          |
|-------------|------------------------------------------|----------------|----------------|
| 2L:9329539  | CG17005 (synonymous)                     |                |                |
| 2L:14253077 |                                          |                |                |
| 2L:19699106 | Lar (intron); scw (downstream)           |                |                |
| 2L:19699202 | Lar (intron); scw (downstream)           |                |                |
| 2L:20858879 | CG9336 (intron); CG14400 (upstream)      |                |                |
| 2R:10764464 | Cyp6a23 (intron); Cyp6a19 (upstream)     | <i>Cyp6a17</i> | <i>Cyp6a17</i> |
| 2R:10764570 | Cyp6a23 (synonymous); Cyp6a19 (upstream) | <i>Cyp6a17</i> | <i>Cyp6a17</i> |
| 2R:10764798 | Cyp6a23 (synonymous); Cyp6a19 (upstream) | <i>Cyp6a17</i> | <i>Cyp6a17</i> |
| 2R:10787290 | Cyp317a1 (synonymous)                    |                |                |
| 2R:10787296 | Cyp317a1 (synonymous)                    |                |                |
| 2R:10787494 | Cyp317a1 (synonymous)                    |                |                |
| 2R:10787515 | Cyp317a1 (synonymous)                    |                |                |
| 2R:10787521 | Cyp317a1 (synonymous)                    |                |                |
| 2R:10787548 | Cyp317a1 (synonymous)                    |                |                |
| 2R:11163763 | Trpm (intron)                            |                |                |
