# Supplementary material
Source: publisher figshare collection journal article supplement (https://gsajournals.figshare.com/articles/dataset/_/6954443)
Supplement: Supplementary file 12 [file 1]

| Population               | Ace I199V | Ace G303A | Ace F368Y | 2R:8072837* |
|--------------------------|-----------|-----------|-----------|-------------|
| <b>Europe</b>            |           |           |           |             |
| Lyon, France             | 0.63      | 0.16      | 0.07      | 1.00        |
| <b>Asia</b>              |           |           |           |             |
| Beijing, China           | 0.00      | 0.57      | 0.00      | 0.92        |
| <b>North America</b>     |           |           |           |             |
| Ithaca, NY, USA          | 0.11      | 0.22      | 0.00      | 1.00        |
| Winters, CA, USA         | 0.71      | 0.19      | 0.19      | 1.00        |
| Raleigh, NC, USA         | 0.40      | 0.28      | 0.28      | 0.96        |
| <b>Africa</b>            |           |           |           |             |
| Cairo, Egypt             | 0.91      | 0.27      | 0.18      | 1.00        |
| Fiche, Ethiopia          | 0.00      | 0.00      | 0.00      | 0.62        |
| Oku, Cameroon            | 0.00      | 0.00      | 0.00      | 0.40        |
| Gikongoro, Rwanda        | 0.14      | 0.32      | 0.09      | 1.00        |
| Siavonga, Zambia         | 0.13      | 0.05      | 0.05      | 0.75        |
| Phalaborwa, SouthAfrica  | 0.22      | 0.00      | 0.00      | 0.83        |
| Dullstroom, South Africa | 0.45      | 0.00      | 0.00      | 0.56        |
| <b>Australia</b>         |           |           |           |             |
| Sorell, TAS, Australia   | 0.33      | 0.33      | 0.33      | 0.92        |
