# Supplementary material
Source: publisher figshare collection journal article supplement (https://gsajournals.figshare.com/articles/dataset/_/6954443)

**A**      **2R:7722921-8486706**

■ *Cyp6g1*-M (ancestral)

■ *Cyp6g1*-AA

■ *Cyp6g1*-BA

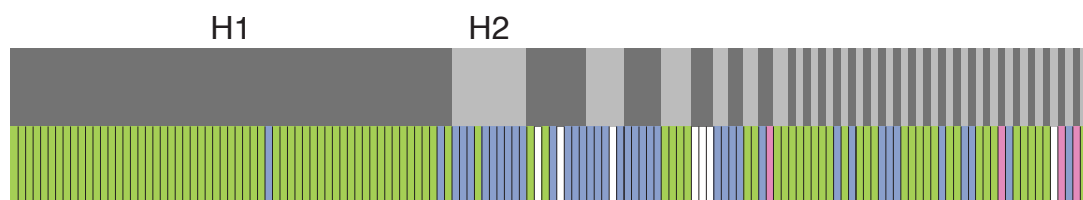

**B**      **3R:6711552-6789665**

■ 3R:6728127 T

■ 3R:6728127 C

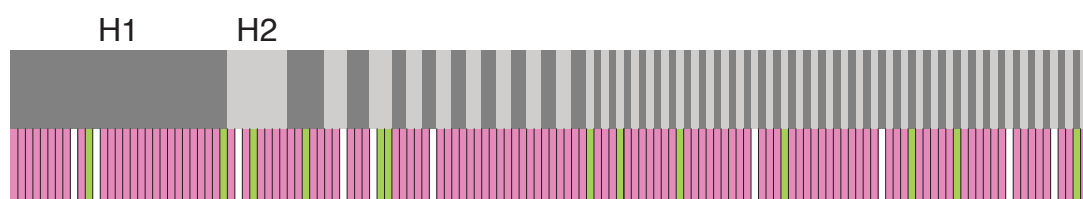

**C**      **3R:8563358-9432483**

■ *Ace* ancestral

■ *Ace* derived

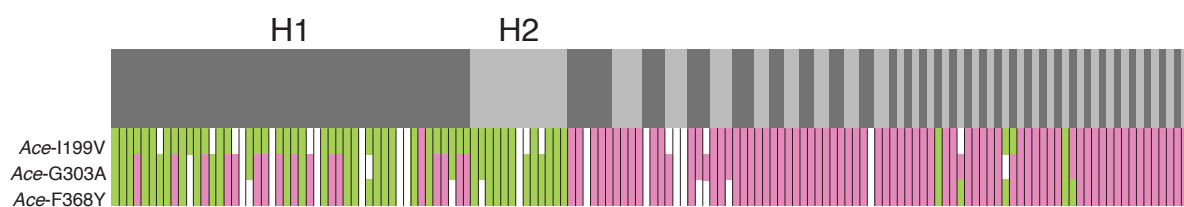

**D**      **3R:13195146-13304663**

■ major allele

■ minor allele

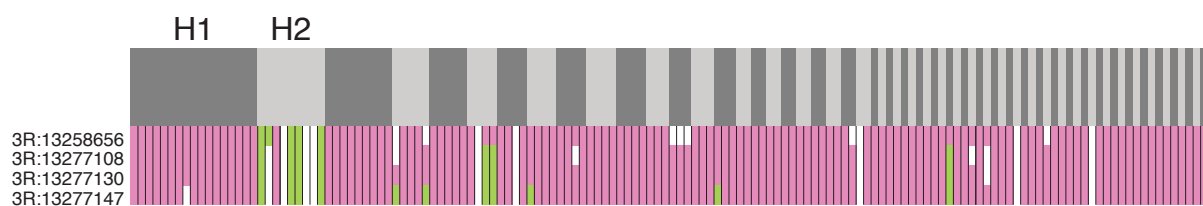

Supplement: Supplementary file 13 [file 1]
