# Supplementary material
Source: publisher figshare collection journal article supplement (https://gsajournals.figshare.com/articles/dataset/_/6954443)

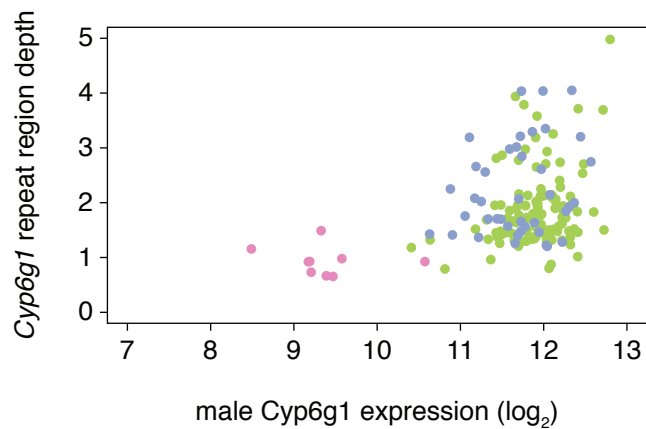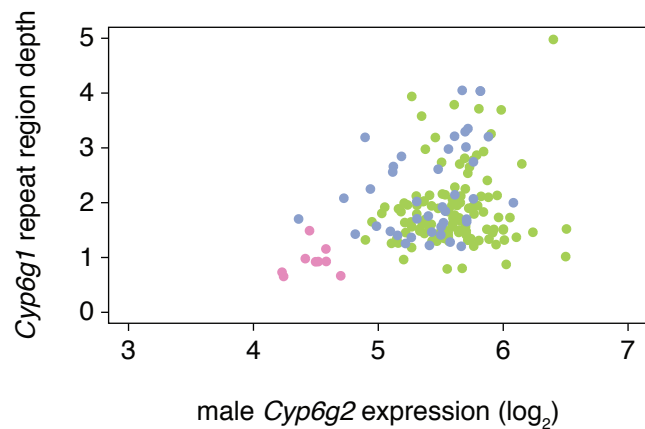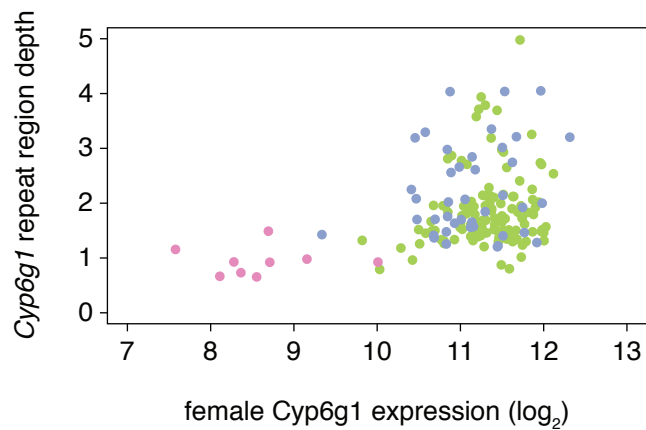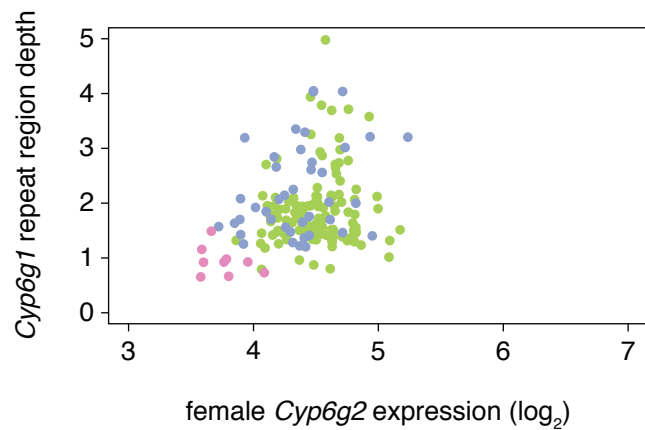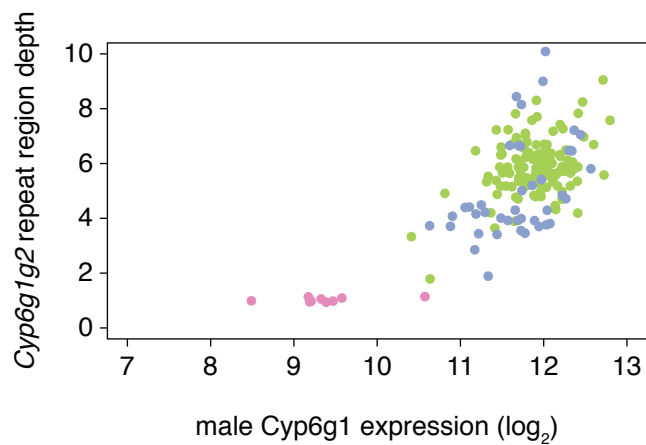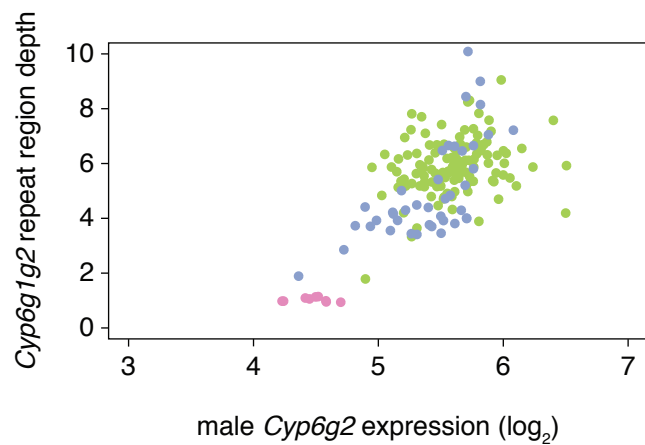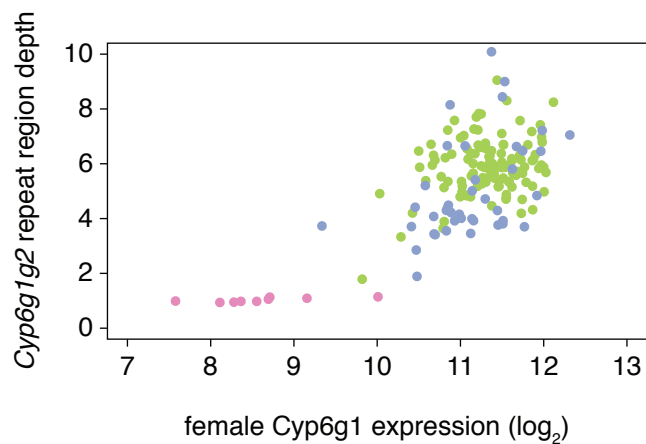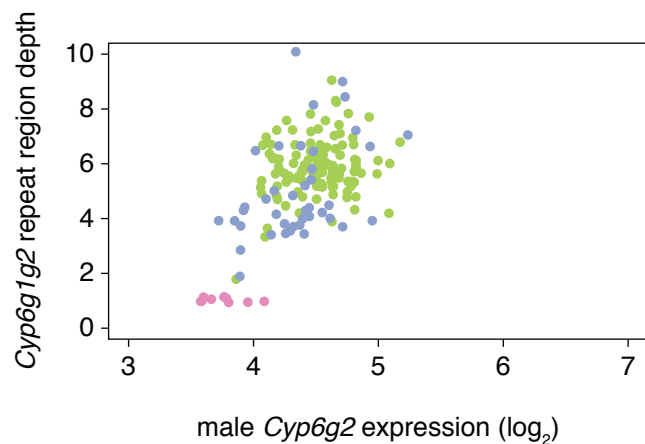

Supplement: Supplementary file 3 [file 1]

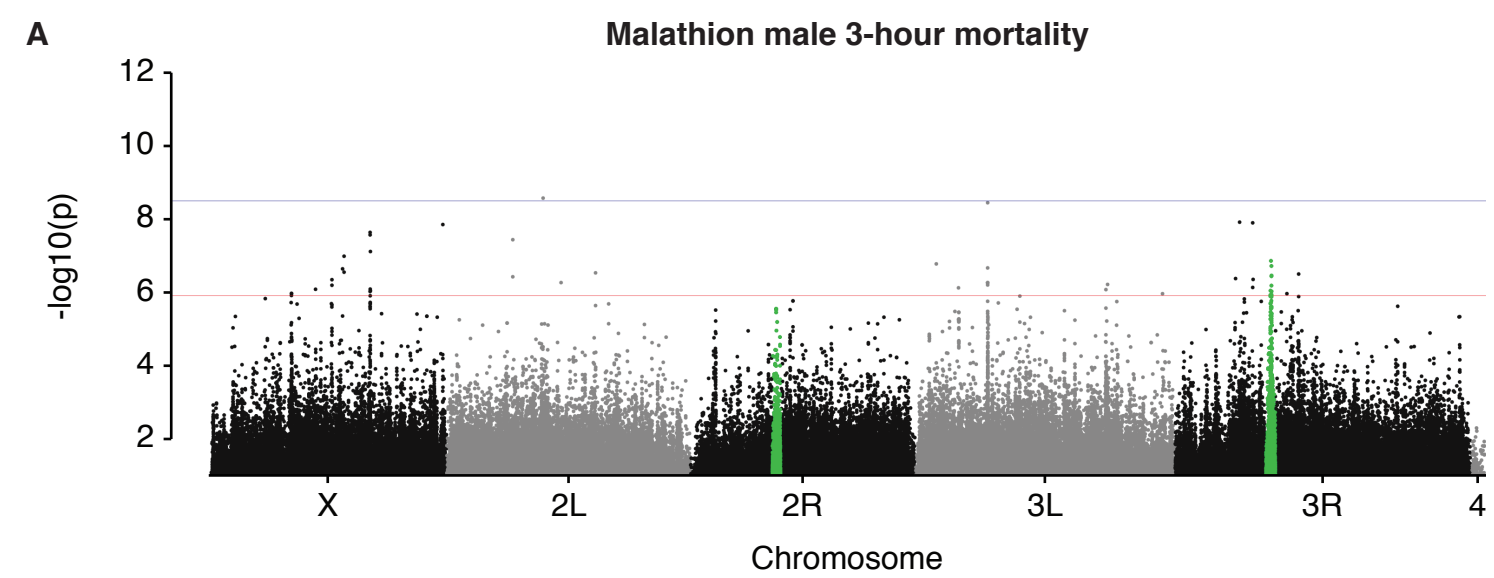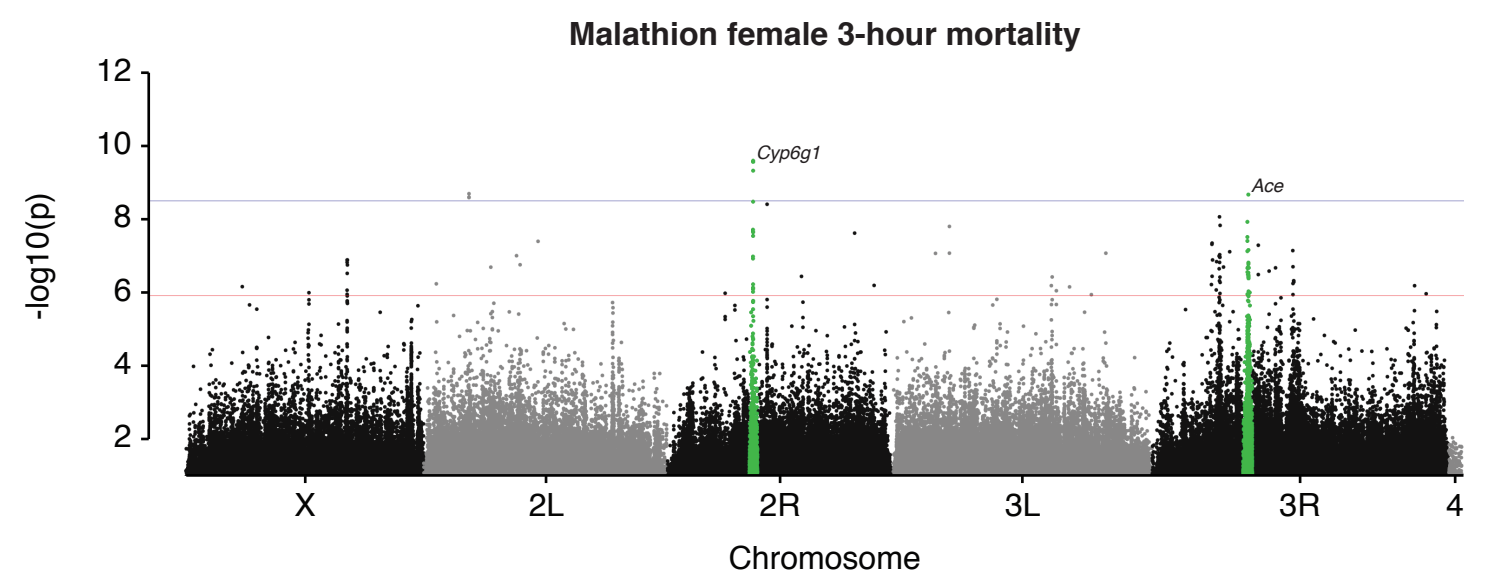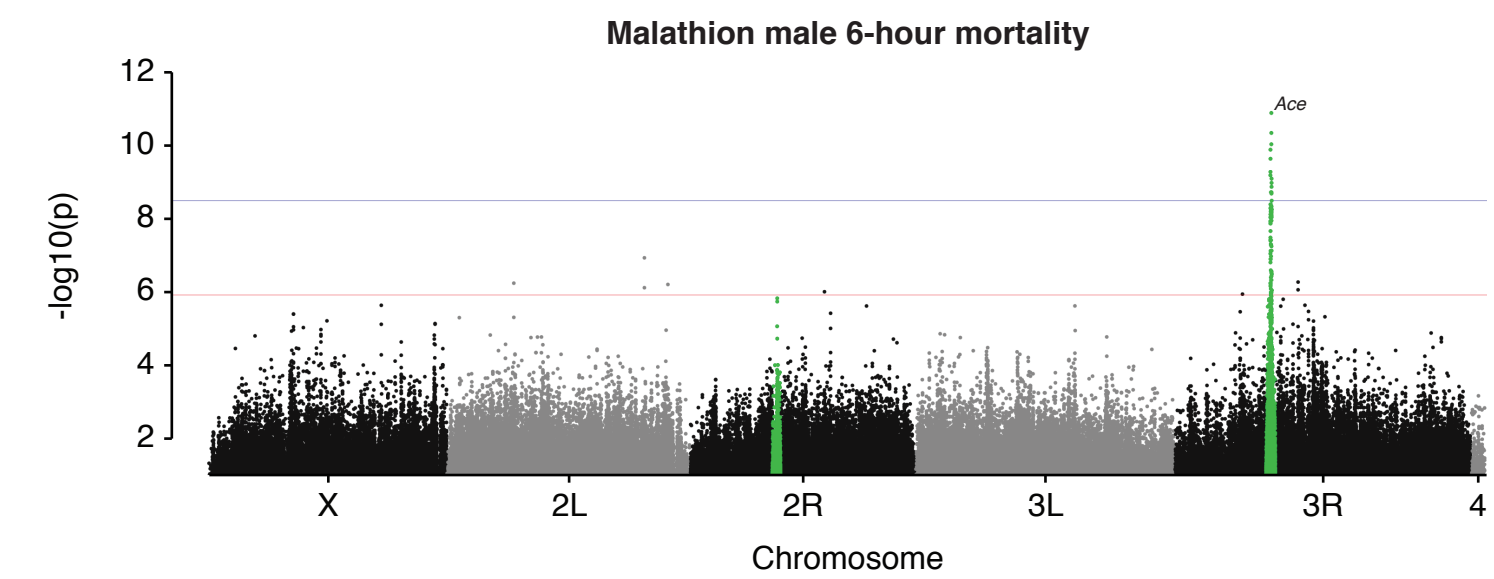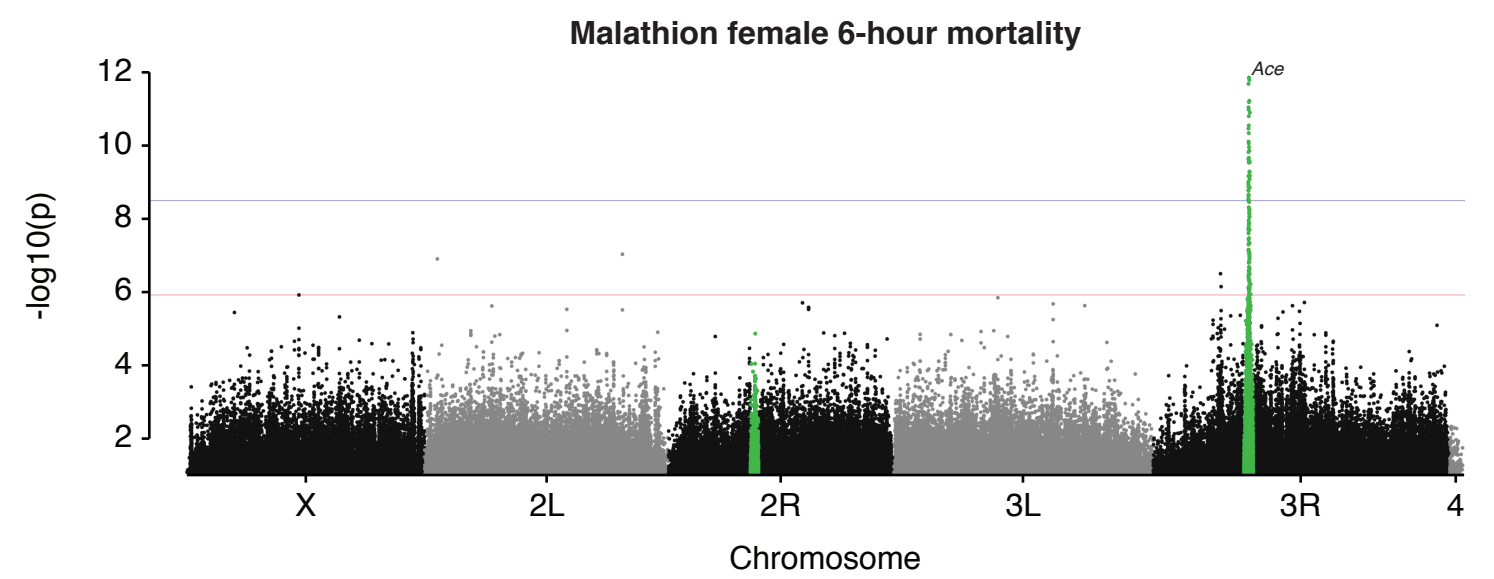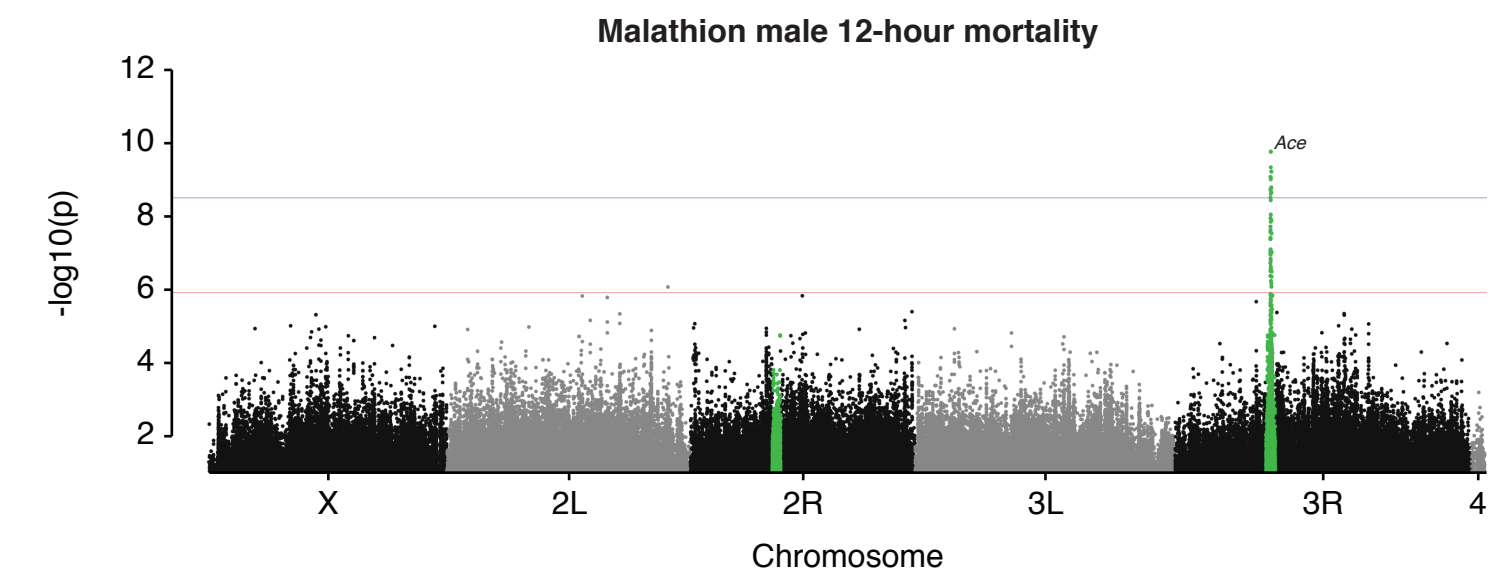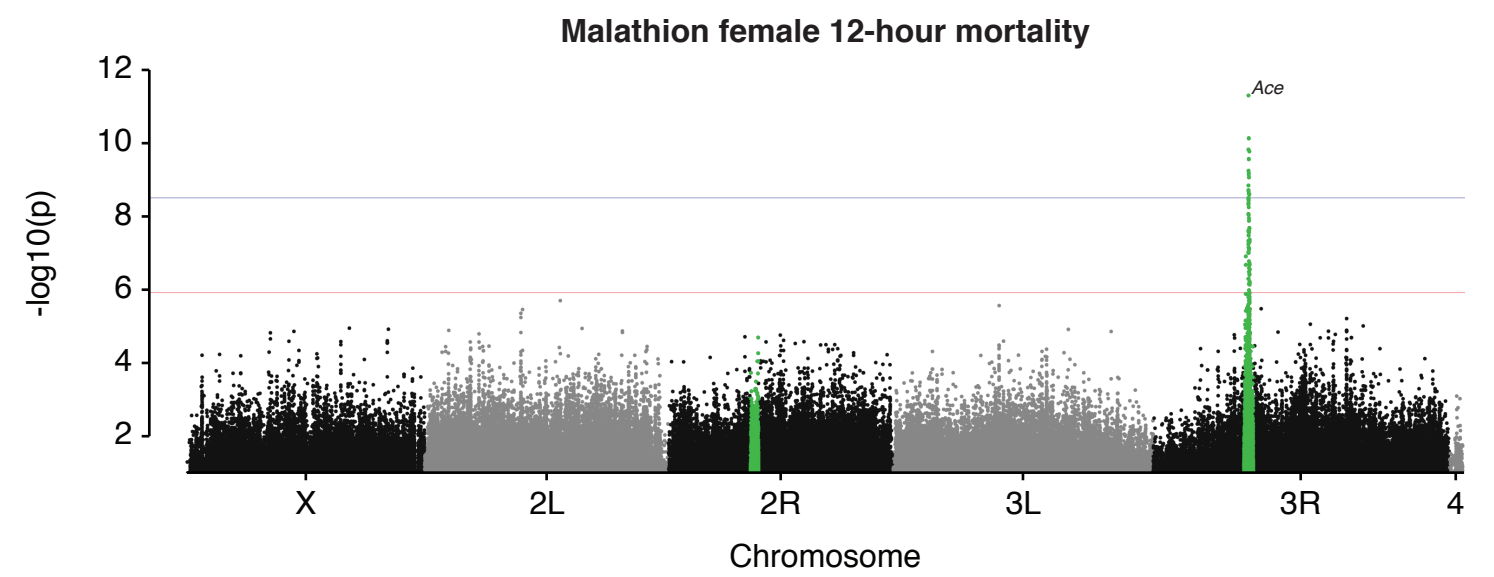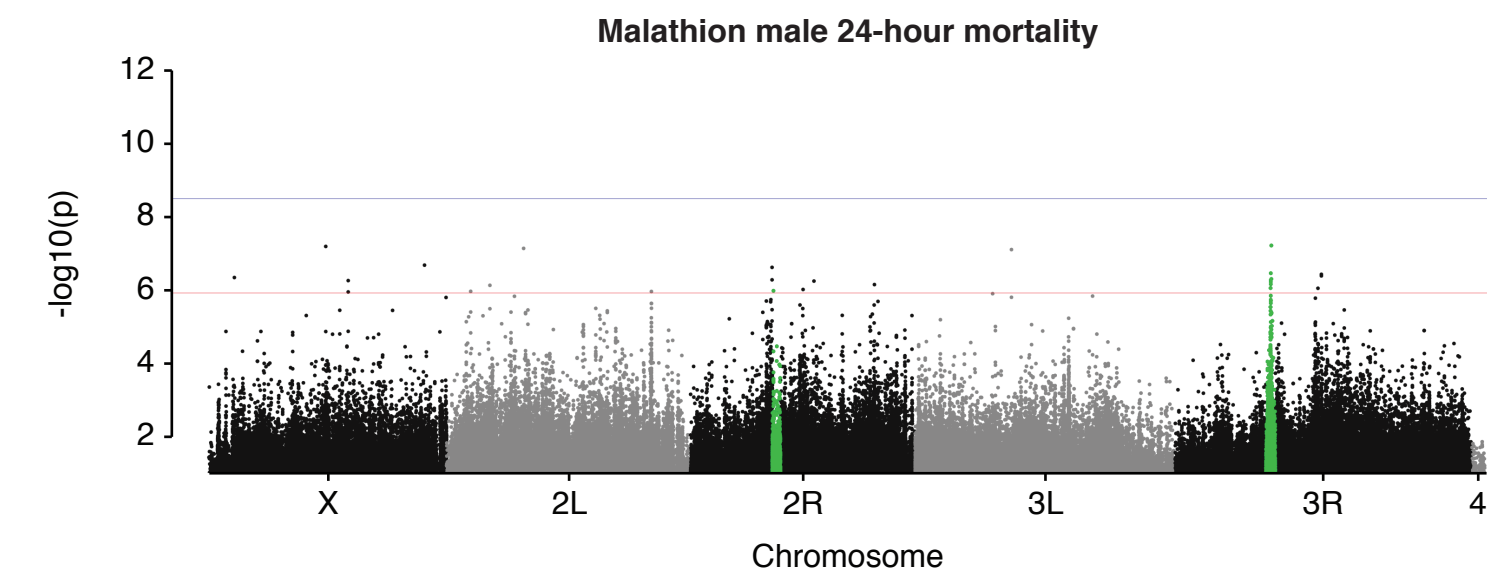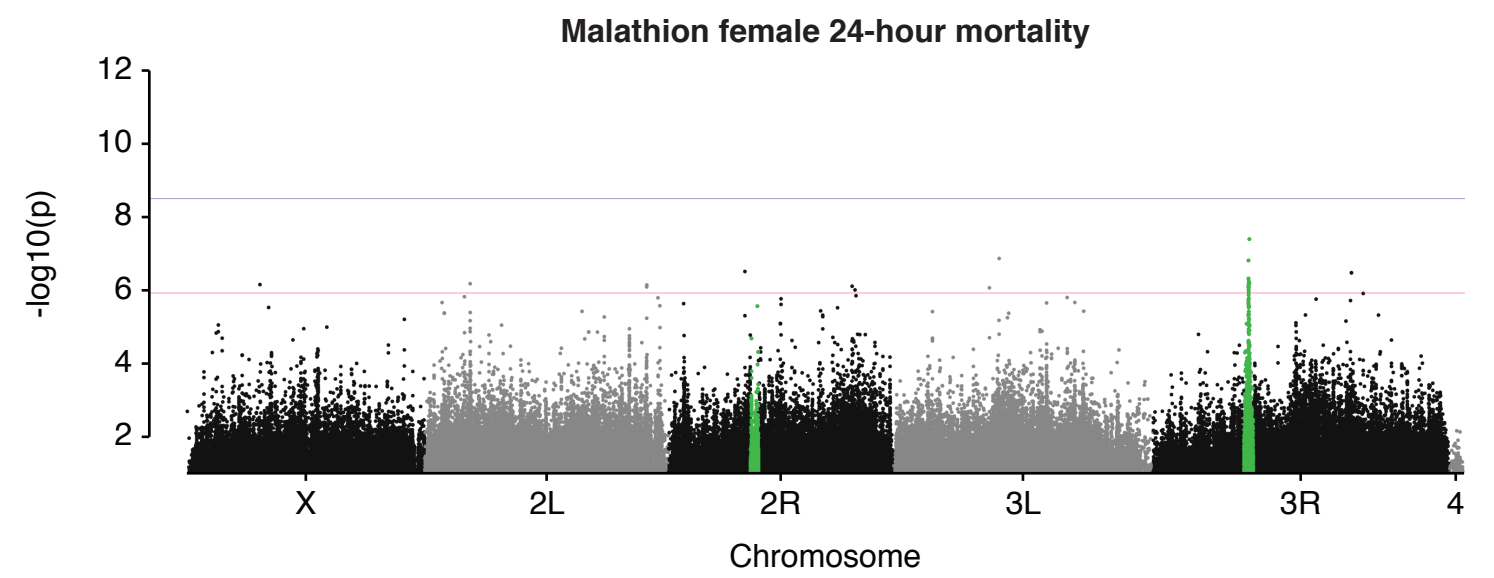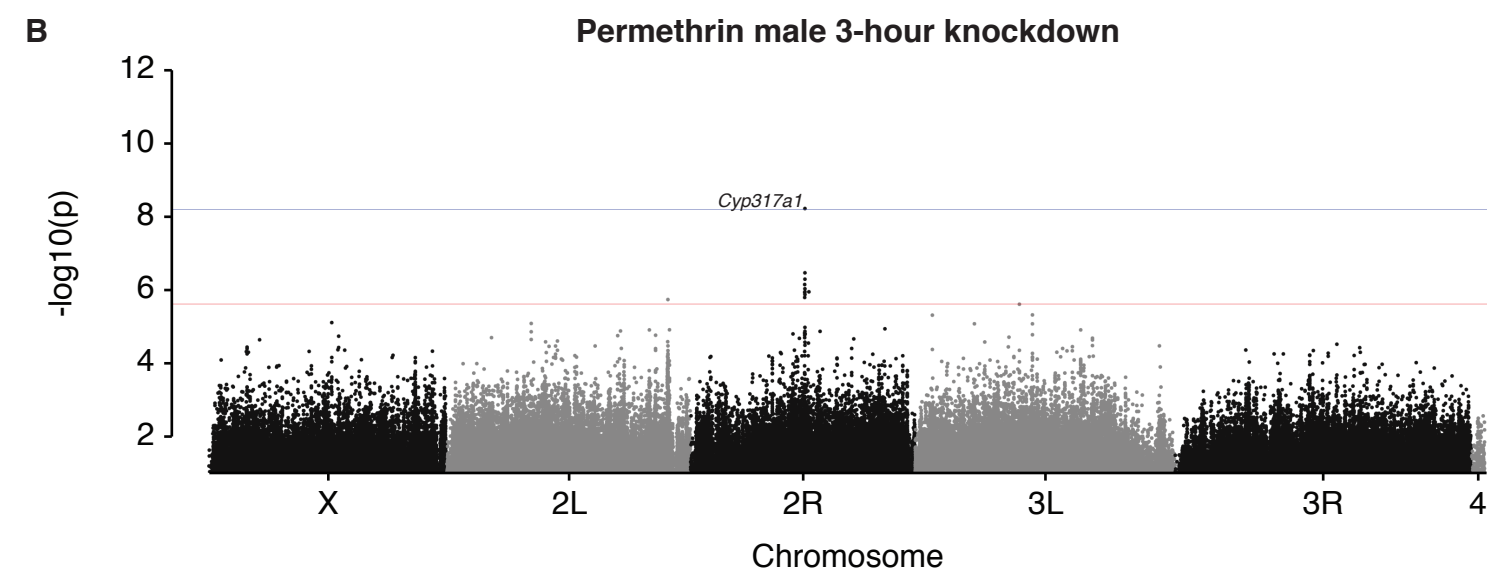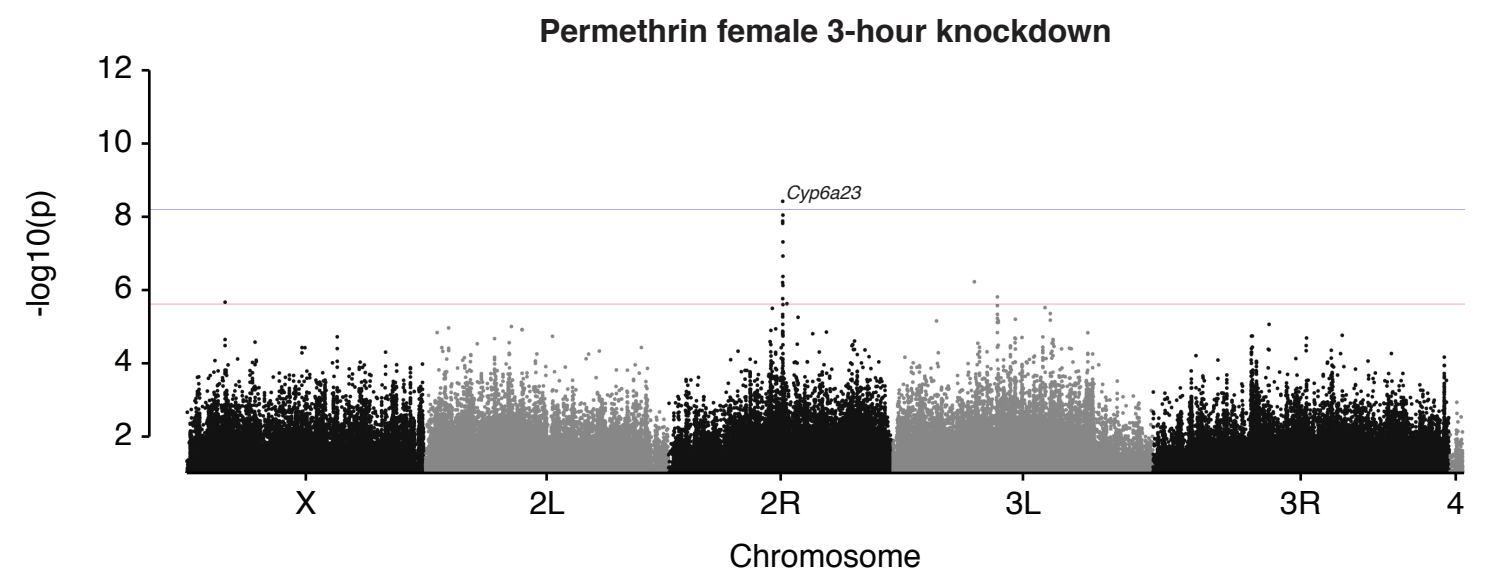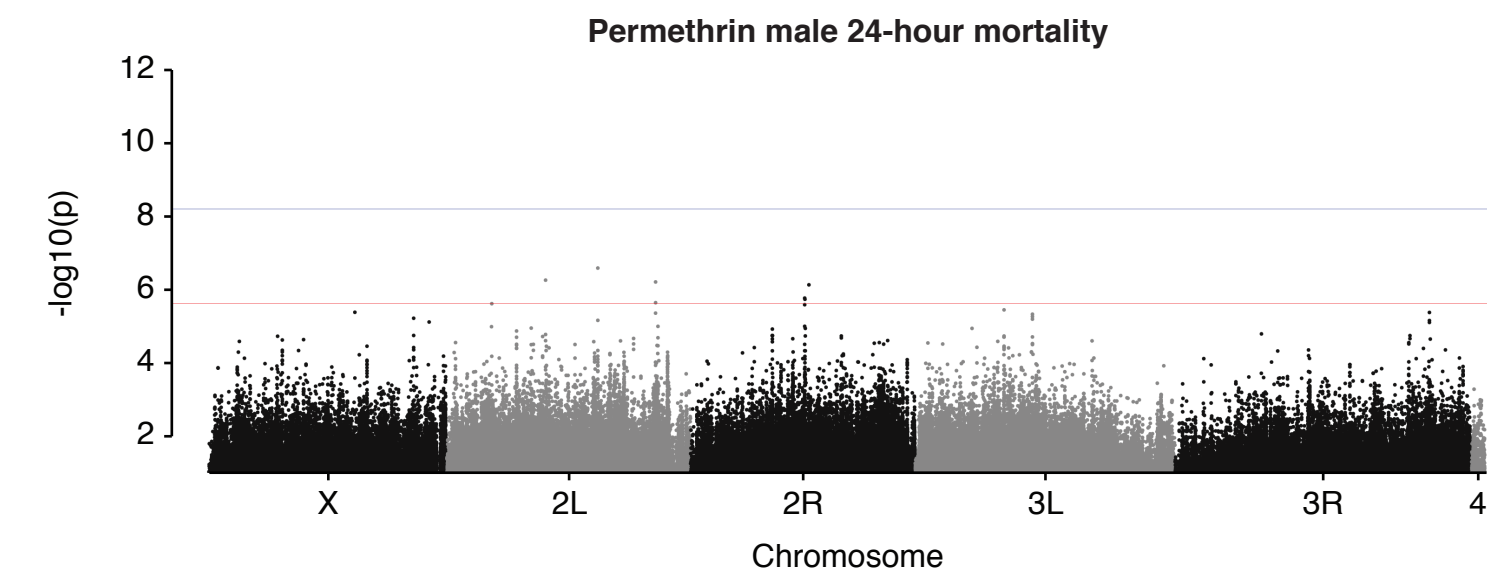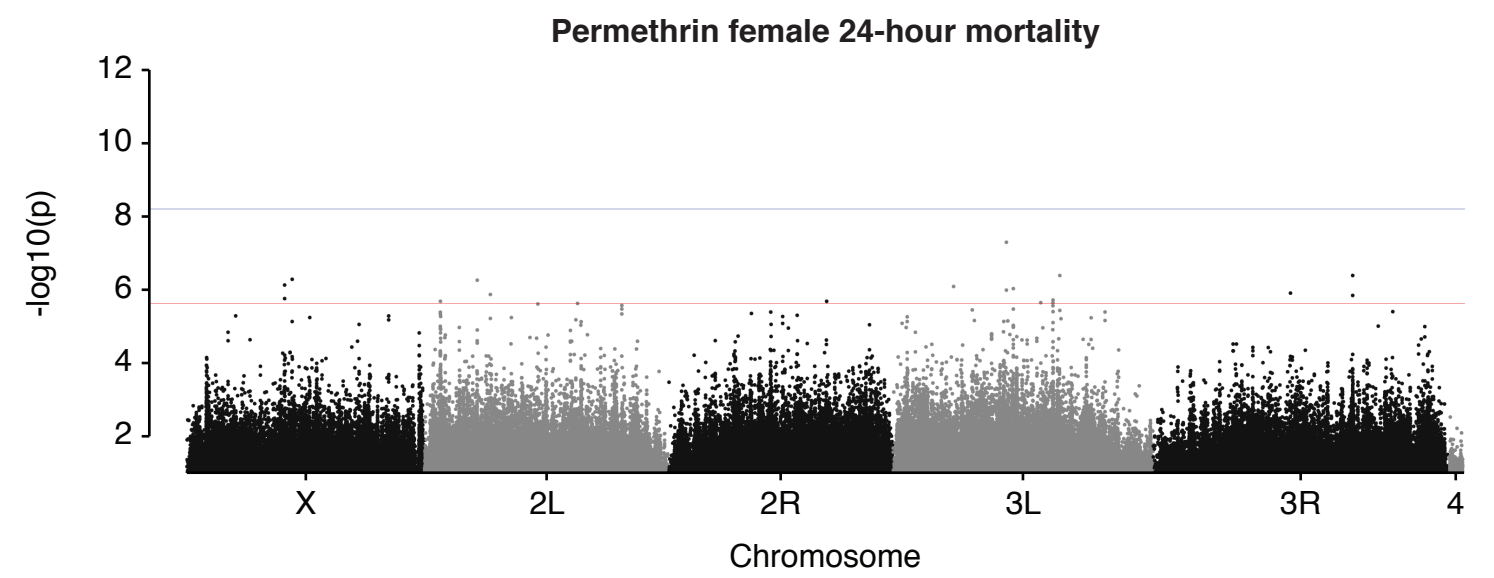

Supplement: Supplementary file 6 [file 1]

**A**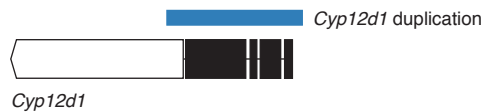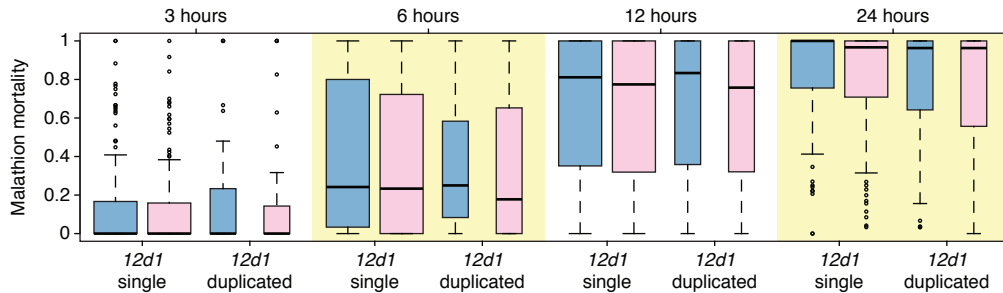**B**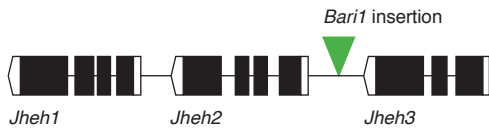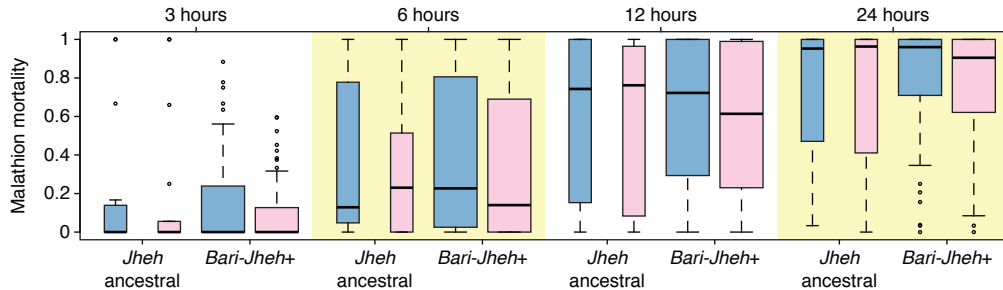

Supplement: Supplementary file 14 [file 1]
